# Supplementary material for: Classification of Acute Myeloid Leukemia by Cell-Free DNA 5-Hydroxymethylcytosine
Source: Genes (Basel). 2023 May 28;14(6):1180. doi: 10.3390/genes14061180 (PMC10298116; doi:10.3390/genes14061180)
Supplement: Supplementary file 1 [file genes-14-01180-s001.zip]

Archive with 4 entries (4 files):
- Supplementary_F_R_F.pdf
- Table S2 List of differentially hydroxymethylated regions.xlsx
- Table S4 List of genes with differentially hydroxymethylated regions.xlsx
- Table S5 Signaling pathways with differentially hydroxymethylated regions.xlsx
