# Supplementary material for: Classification of Acute Myeloid Leukemia by Cell-Free DNA 5-Hydroxymethylcytosine
Source: Genes (Basel). 2023 May 28;14(6):1180. doi: 10.3390/genes14061180 (PMC10298116; doi:10.3390/genes14061180)
Supplement: Supplementary file 1 [file genes-14-01180-s001.zip › Table S2 List of differentially hydroxymethylated regions.xlsx]

## Sheet: C2 vs C1 FDR < 0.05
Region ID	Chromosome	Start	End	Log2FoldChange	FDR	Annotation	Gene symbol
Peak_24570	chr1	107897316	107897914	-2.94386	0.000303726	Promoter (<=1kb)	MIR7852
Peak_10687	chr6	77367945	77369378	-2.89983	0.00319206	Distal Intergenic	HTR1B
Peak_18524	chr17	59829596	59829985	-2.88778	0.000211762	Intron (ENST00000262291.9/81671, intron 10 of 11)	VMP1
Peak_37917	chr19	32223663	32224230	-2.79305	0.000225363	Distal Intergenic	LINC01782
Peak_36204	chr2	109335691	109335911	-2.78212	1.37663e-05	Intron (ENST00000309415.8/344558, intron 1 of 9)	MIR4266
Peak_29148	chr4	16952480	16952952	-2.66748	0.00162315	Distal Intergenic	LDB2
Peak_17218	chr7	2406521	2406968	-2.59327	2.21818e-05	Intron (ENST00000258711.7/55501, intron 1 of 1)	CHST12
Peak_25736	chr1	182259512	182259809	-2.53262	0.00077335	Intron (ENST00000663078.1/400799, intron 1 of 4)	LINC01344
Peak_22086	chr4	84497996	84498772	-2.46035	0.0250006	Promoter (<=1kb)	NKX6-1
Peak_23407	chr17	50027051	50027757	-2.45876	0.00124949	Distal Intergenic	PICART1
Peak_22953	chr9	1051680	1052366	-2.4516	0.0110955	Promoter (<=1kb)	DMRT2
Peak_23435	chr7	6228514	6228845	-2.45007	0.00159186	Intron (ENST00000396741.3/9265, intron 1 of 12)	CYTH3
Peak_22913	chr6	36032326	36032847	-2.42735	0.00169203	Intron (ENST00000622903.4/1432, intron 1 of 6)	MAPK14
Peak_25932	chr10	114404275	114404854	-2.37202	0.0201192	Promoter (<=1kb)	AFAP1L2
Peak_22345	chr18	31042318	31042924	-2.37096	0.0152134	Promoter (<=1kb)	DSC3
Peak_20723	chr7	42227734	42228472	-2.35803	0.00131584	Promoter (<=1kb)	GLI3
Peak_33963	chr5	87340639	87340890	-2.34844	0.0166132	Intron (ENST00000274376.11/5921, intron 5 of 24)	RASA1
Peak_31309	chr11	119315758	119316295	-2.34815	0.00951762	Promoter (<=1kb)	MCAM
Peak_16776	chr18	37566741	37567700	-2.34623	0.00716886	Promoter (<=1kb)	LOC107985118
Peak_27062	chr3	11140286	11140496	-2.33706	0.0208752	Intron (ENST00000438284.2/3269, intron 1 of 1)	HRH1
Peak_24563	chr14	70886720	70887256	-2.3279	0.00506367	Distal Intergenic	PCNX1
Peak_24830	chr19	46493732	46494246	-2.32723	0.00490963	Promoter (1-2kb)	PNMA8B
Peak_17535	chr2	113390013	113390516	-2.3189	0.0368322	Intron (ENST00000653674.1/101927400, intron 2 of 3)	LOC101927400
Peak_33940	chr21	17003876	17004310	-2.31061	0.023574	Distal Intergenic	MIR99AHG
Peak_24767	chr17	39209597	39209852	-2.30376	0.0433905	Distal Intergenic	RPL19
Peak_29064	chr5	5494478	5494702	-2.29527	0.0162979	Distal Intergenic	ICE1
Peak_26785	chr17	42457041	42457443	-2.28492	0.00707548	Promoter (1-2kb)	ATP6V0A1
Peak_28432	chr5	158642650	158642851	-2.27542	0.0220237	Distal Intergenic	EBF1
Peak_31934	chr12	56720419	56720779	-2.26849	0.00249888	Exon (ENST00000550952.6/4666, exon 3 of 11)	NACA
Peak_27788	chr18	34222527	34223528	-2.26684	0.0121338	Promoter (<=1kb)	NOL4
Peak_22573	chr12	85036259	85036657	-2.26582	0.0409705	Promoter (<=1kb)	TSPAN19
Peak_15376	chr20	10218795	10219533	-2.2565	0.0409262	Promoter (<=1kb)	SNAP25-AS1
Peak_26727	chr7	92754811	92755161	-2.25647	0.000213926	Intron (ENST00000265734.8/1021, intron 3 of 7)	CDK6
Peak_19979	chr7	42238079	42238521	-2.25007	0.00389736	Promoter (<=1kb)	GLI3
Peak_36090	chr12	51972385	51972966	-2.24701	5.61136e-05	Intron (ENST00000257963.9/91, intron 1 of 8)	ACVR1B
Peak_31811	chr1	109370988	109371202	-2.24031	0.00589072	Promoter (1-2kb)	SORT1
Peak_22099	chr10	17428370	17428935	-2.23383	0.00230673	Intron (ENST00000657045.1/105376436, intron 3 of 6)	ST8SIA6
Peak_23270	chr11	12827934	12828598	-2.23074	0.0302712	Promoter (<=1kb)	TEAD1
Peak_12764	chr2	167292209	167293923	-2.22654	0.00243753	Promoter (<=1kb)	B3GALT1
Peak_18911	chr7	155344670	155344979	-2.22654	0.036808	Distal Intergenic	BLACE
Peak_18970	chr2	95345329	95346254	-2.21943	0.0372663	Promoter (<=1kb)	KCNIP3
Peak_21547	chr2	129161111	129161408	-2.21764	0.0282513	Distal Intergenic	LINC01854
Peak_20919	chr3	138200129	138200488	-2.20558	0.00139931	Intron (ENST00000538260.5/25852, intron 1 of 20)	ARMC8
Peak_34496	chr10	54621628	54622035	-2.20314	0.0360542	Intron (ENST00000422842.1/105378311, intron 4 of 5)	MIR548F1
Peak_27299	chr5	138240826	138241135	-2.19004	0.0183772	Distal Intergenic	CDC23
Peak_33981	chr9	82513364	82513686	-2.18885	0.0158216	Intron (ENST00000637606.1/105376107, intron 9 of 9)	LOC107987087
Peak_12899	chr12	54390688	54391647	-2.1828	3.25816e-06	Promoter (<=1kb)	ZNF385A
Peak_39086	chr6	6943037	6943192	-2.1753	0.0211755	Distal Intergenic	LOC105374904
Peak_16504	chr7	121438148	121438974	-2.17487	0.0105031	Distal Intergenic	FAM3C
Peak_18963	chr12	100447205	100447652	-2.17474	0.000760787	Distal Intergenic	NR1H4
Peak_20427	chr11	75668113	75668887	-2.17468	0.0199	Promoter (<=1kb)	MAP6
Peak_19875	chr18	48136668	48137465	-2.17116	4.22037e-05	Promoter (<=1kb)	ZBTB7C
Peak_26791	chr8	69676609	69676783	-2.15595	0.00892637	3' UTR	LOC105375889
Peak_20628	chr8	66962720	66963477	-2.15568	0.00568437	Promoter (<=1kb)	TCF24
Peak_18674	chr11	72589892	72590370	-2.14861	0.000146375	Promoter (<=1kb)	PDE2A
Peak_27154	chr2	186889094	186889545	-2.14814	0.000203003	Distal Intergenic	ZSWIM2
Peak_33664	chr4	116925802	116926258	-2.14548	0.0364567	Intron (ENST00000654940.1/107986306, intron 3 of 8)	LOC107986306
Peak_17885	chr17	40177547	40177869	-2.1421	0.0301275	Promoter (<=1kb)	RAPGEFL1
Peak_22917	chr7	100605224	100605905	-2.1321	0.00200178	Promoter (<=1kb)	PCOLCE
Peak_17400	chr4	52051124	52052510	-2.13085	0.000303726	Promoter (<=1kb)	SPATA18
Peak_27934	chr4	110622860	110623316	-2.12048	0.0143559	Promoter (<=1kb)	PITX2
Peak_28508	chr12	93593627	93593809	-2.11605	0.0375249	Distal Intergenic	SOCS2
Peak_34842	chr8	54554234	54554896	-2.11541	0.0147102	Promoter (<=1kb)	RP1
Peak_25269	chr9	24698990	24699353	-2.11496	0.0436126	Distal Intergenic	IZUMO3
Peak_27769	chr17	64777261	64777678	-2.10894	0.00180724	Intron (ENST00000578492.5/109286553, intron 2 of 11)	MIR6080
Peak_22127	chr10	103692566	103693162	-2.10883	0.00028507	Promoter (<=1kb)	SH3PXD2A
Peak_19445	chr7	94394631	94395276	-2.10344	0.00616425	Promoter (<=1kb)	COL1A2
Peak_17722	chr4	15755912	15756414	-2.09973	0.0204413	Distal Intergenic	CD38
Peak_27088	chr9	122213631	122214112	-2.09366	0.00171373	Promoter (<=1kb)	LHX6
Peak_17216	chr7	108454657	108456526	-2.09258	0.0114189	Promoter (<=1kb)	NRCAM
Peak_22199	chr14	99752674	99753144	-2.0922	0.0085149	Intron (ENST00000554479.5/2009, intron 1 of 10)	EML1
Peak_21635	chr8	41797679	41798063	-2.0866	0.0232576	Promoter (<=1kb)	ANK1
Peak_19405	chr3	5026553	5027057	-2.07952	0.0393805	Distal Intergenic	BHLHE40-AS1
Peak_28818	chr14	88005330	88005635	-2.07812	0.0494782	Promoter (<=1kb)	GPR65
Peak_25362	chr1	44048074	44048578	-2.07392	0.00592178	Promoter (<=1kb)	KLF17
Peak_28158	chr6	142029998	142030678	-2.07379	0.00642062	Distal Intergenic	GJE1
Peak_14104	chr1	84433327	84434020	-2.07361	0.0124962	Distal Intergenic	DNASE2B
Peak_30043	chr2	132267901	132268217	-2.07276	0.0152406	Distal Intergenic	ANKRD30BL
Peak_15881	chr9	37034136	37034752	-2.06792	0.0139396	Promoter (<=1kb)	PAX5
Peak_40302	chr10	298494	298685	-2.06424	0.00146294	Intron (ENST00000381496.7/22982, intron 31 of 35)	DIP2C
Peak_21965	chr4	13074797	13075205	-2.06006	0.0135247	Distal Intergenic	RAB28
Peak_22315	chr2	172103055	172103431	-2.05775	0.0454602	Promoter (<=1kb)	DLX2-DT
Peak_11436	chr18	32471052	32471670	-2.0467	0.0294417	Promoter (<=1kb)	GAREM1
Peak_19906	chr2	127218807	127219640	-2.04581	0.0149463	Promoter (<=1kb)	CYP27C1
Peak_23385	chr11	127733882	127734313	-2.04571	0.0142732	Distal Intergenic	LINC02725
Peak_15461	chr9	1047720	1048450	-2.04215	0.0250006	Promoter (1-2kb)	DMRT2
Peak_16938	chr15	24772780	24773555	-2.04084	0.00285418	Intron (ENST00000651136.1/791114, intron 9 of 14)	SNRPN
Peak_26110	chr17	50559236	50559689	-2.03862	0.00678085	Promoter (<=1kb)	CACNA1G-AS1
Peak_15468	chr19	13846783	13847175	-2.03109	0.0266745	Distal Intergenic	MIR23AHG
Peak_15287	chr20	25853768	25854458	-2.02971	0.0303528	Promoter (<=1kb)	LOC101926935
Peak_35079	chr7	100041041	100041501	-2.02933	0.00299639	3' UTR	ZSCAN21
Peak_7995	chr12	91381430	91382276	-2.02407	0.00191207	Distal Intergenic	LINC02823
Peak_36897	chr19	23204179	23204366	-2.01845	0.0273637	Exon (ENST00000598402.1/ENST00000598402.1, exon 1 of 1)	ZNF724
Peak_24996	chr9	127927199	127927428	-2.01843	0.0427531	Promoter (<=1kb)	PIP5KL1
Peak_32744	chr18	57441181	57441667	-2.01592	0.0184902	Intron (ENST00000491143.3/9480, intron 1 of 1)	ONECUT2
Peak_24097	chr1	43058696	43058953	-2.01538	0.0229892	Distal Intergenic	FAM183A
Peak_23565	chr1	6465786	6466064	-2.01468	0.00732112	Promoter (<=1kb)	TNFRSF25
Peak_11188	chr12	4269434	4270577	-2.01362	0.0196431	Promoter (<=1kb)	CCND2
Peak_18131	chr5	159106554	159106967	-2.01248	0.0171325	Exon (ENST00000523301.1/107986467, exon 2 of 2)	LINC02202
Peak_23262	chr7	38102685	38102995	-2.0095	0.0409301	Distal Intergenic	STARD3NL
Peak_29656	chr1	147079926	147080431	-2.00681	0.0182534	Distal Intergenic	RNVU1-8
Peak_23978	chr2	44778931	44779240	-2.00287	0.0162979	Distal Intergenic	CAMKMT
Peak_21451	chr10	123994493	123994780	-2.0009	0.0458543	Distal Intergenic	CHST15
Peak_22836	chr2	72144619	72145427	-1.99728	0.0227553	Promoter (<=1kb)	CYP26B1
Peak_34137	chr3	23324924	23325218	-1.99318	0.0453919	Intron (ENST00000425792.5/7325, intron 3 of 5)	UBE2E2
Peak_27993	chr6	99603541	99603971	-1.99057	0.0135247	Distal Intergenic	PRDM13
Peak_24886	chr20	41615714	41615997	-1.99012	0.00404989	Promoter (<=1kb)	CHD6
Peak_6013	chr11	68839389	68841721	-1.99001	0.0201192	Promoter (<=1kb)	CPT1A
Peak_22341	chr2	196459471	196459809	-1.9894	0.0329501	Intron (ENST00000260983.8/57520, intron 1 of 28)	HECW2
Peak_26976	chr17	50127601	50127859	-1.98858	0.00727362	Promoter (1-2kb)	SAMD14
Peak_23215	chr3	196631890	196632522	-1.98833	0.0083355	Promoter (<=1kb)	LINC01063
Peak_15521	chr15	60592687	60593365	-1.98758	0.0129658	Promoter (<=1kb)	RORA
Peak_19448	chr8	103500195	103501051	-1.98505	0.0415981	Promoter (<=1kb)	RIMS2
Peak_33298	chr1	240493177	240493448	-1.98224	0.0422503	Exon (ENST00000318160.5/64388, exon 2 of 2)	FMN2
Peak_34509	chr17	3640051	3640278	-1.97982	0.00139931	Promoter (<=1kb)	CTNS
Peak_22794	chr19	3275310	3275978	-1.97624	0.0302712	Promoter (1-2kb)	CELF5
Peak_43986	chr17	61139132	61139388	-1.97516	0.0165917	Intron (ENST00000407086.8/54828, intron 22 of 23)	LOC107984992
Peak_15087	chr15	85840257	85840781	-1.97343	0.0229832	Distal Intergenic	MIR548AP
Peak_21580	chr3	58898973	58899788	-1.97308	0.0143641	Intron (ENST00000493123.1/101929238, intron 1 of 1)	CFAP20DC
Peak_21676	chr11	61516536	61517165	-1.9717	0.000491447	3' UTR	LRRC10B
Peak_17195	chr3	180679221	180680283	-1.96912	0.0326971	Promoter (<=1kb)	CCDC39
Peak_22173	chr4	109302151	109302968	-1.96548	0.0229832	Promoter (<=1kb)	COL25A1
Peak_22412	chr8	23881351	23881798	-1.9643	0.0108247	Distal Intergenic	STC1
Peak_32038	chr8	69676025	69676473	-1.96252	0.00662486	Intron (ENST00000260126.9/81796, intron 9 of 9)	LOC105375889
Peak_25668	chr5	77972038	77972780	-1.9584	0.000303726	Distal Intergenic	LOC101929154
Peak_35372	chr11	40291642	40292050	-1.95106	0.00664817	Promoter (1-2kb)	LRRC4C
Peak_30256	chr7	815703	816162	-1.94929	0.00245123	Promoter (<=1kb)	SUN1
Peak_17443	chr1	85577079	85578152	-1.9482	0.000389898	Promoter (<=1kb)	DDAH1
Peak_9992	chr7	47991648	47992435	-1.94753	0.000389898	Intron (ENST00000473723.5/256979, intron 3 of 5)	SUN3
Peak_26911	chr2	111698902	111699378	-1.94155	0.00602648	Promoter (<=1kb)	MIR4435-2HG
Peak_48359	chr5	125485049	125485301	-1.93885	0.0127165	Intron (ENST00000647105.1/101927421, intron 4 of 6)	LINC02240
Peak_41171	chr10	49272828	49273104	-1.93614	0.00108413	Distal Intergenic	C10orf71-AS1
Peak_34247	chr12	5402195	5402821	-1.93448	0.0189924	Exon (ENST00000538430.1/105369618, exon 2 of 5)	LOC105369618
Peak_38497	chr9	123053747	123053991	-1.93411	0.0446798	Intron (ENST00000456584.5/23637, intron 14 of 27)	RABGAP1
Peak_38139	chr20	53642699	53643447	-1.93006	0.0171325	Distal Intergenic	ZNF217
Peak_30724	chr15	75867272	75867475	-1.92673	0.045156	Promoter (1-2kb)	UBE2Q2
Peak_18059	chr11	2480790	2481642	-1.92541	4.06037e-05	Intron (ENST00000496887.6/3784, intron 2 of 6)	KCNQ1
Peak_31184	chr20	52494200	52494557	-1.92383	0.0228479	Intron (ENST00000663974.1/105372666, intron 3 of 4)	LINC01524
Peak_22927	chr7	152925150	152925813	-1.92228	0.0231999	Exon (ENST00000658865.1/ENST00000658865.1, exon 1 of 4)	ACTR3B
Peak_20373	chr1	156706274	156706822	-1.92051	0.0300284	Promoter (<=1kb)	CRABP2
Peak_16019	chr13	71610874	71611550	-1.92003	0.000303726	Intron (ENST00000611519.4/1602, intron 3 of 7)	DACH1
Peak_19221	chr4	113978973	113980179	-1.91908	0.00649429	Promoter (<=1kb)	ARSJ
Peak_36265	chr1	168342926	168343135	-1.91697	0.0229915	Intron (ENST00000636624.1/ENST00000636624.1, intron 1 of 3)	MIR557
Peak_11994	chr11	122983974	122985049	-1.91549	0.0110768	Distal Intergenic	BSX
Peak_28487	chr3	131386552	131387441	-1.9137	0.00198855	3' UTR	NUDT16
Peak_26112	chr17	64985557	64986015	-1.91211	0.0108218	Distal Intergenic	AMZ2P1
Peak_2244	chr2	144517022	144520447	-1.90968	0.00358457	Promoter (<=1kb)	ZEB2-AS1
Peak_7988	chr13	74135650	74136750	-1.904	0.0117779	Promoter (1-2kb)	KLF12
Peak_27267	chr9	132546161	132546763	-1.90369	0.0207531	Intron (ENST00000393216.3/389799, intron 5 of 5)	BARHL1
Peak_14047	chr8	144477572	144477887	-1.90131	0.0223226	Promoter (<=1kb)	PPP1R16A
Peak_14815	chr8	22693505	22694948	-1.89986	0.00988229	Promoter (<=1kb)	EGR3
Peak_24093	chr4	38177066	38177433	-1.89948	0.00337733	Distal Intergenic	TBC1D1
Peak_16895	chr20	36154754	36155180	-1.89524	0.00972583	Promoter (<=1kb)	EPB41L1-AS1
Peak_28295	chr12	1533461	1534284	-1.89435	3.59475e-06	Intron (ENST00000539198.5/81029, intron 1 of 3)	WNT5B
Peak_26159	chr19	32224271	32224743	-1.8923	0.0315021	Distal Intergenic	LINC01782
Peak_20659	chr3	100047746	100048064	-1.88445	0.000673808	Intron (ENST00000463526.1/84319, intron 1 of 3)	FILIP1L
Peak_29087	chr10	132335757	132336060	-1.88304	0.00493989	Promoter (<=1kb)	LRRC27
Peak_19153	chr1	154999664	155000609	-1.88284	0.0337331	Distal Intergenic	ZBTB7B
Peak_21994	chr6	19837847	19838844	-1.88276	0.0385913	Promoter (<=1kb)	LOC105374959
Peak_25239	chr17	57284618	57285344	-1.88264	5.25048e-05	Promoter (<=1kb)	MSI2
Peak_15778	chr10	16520959	16521990	-1.88174	0.0303697	Promoter (<=1kb)	LOC101928701
Peak_32948	chr22	19766823	19767175	-1.88164	0.0306815	Promoter (1-2kb)	TBX1
Peak_21339	chr6	20564615	20564995	-1.88128	0.0374854	Intron (ENST00000274695.8/54901, intron 4 of 15)	CDKAL1
Peak_29318	chr18	63098741	63099085	-1.88041	0.00233322	Distal Intergenic	BCL2
Peak_17708	chr3	136758363	136758694	-1.88028	0.000546288	Distal Intergenic	STAG1
Peak_29769	chr11	64292183	64292778	-1.88006	0.0283606	Promoter (<=1kb)	KCNK4
Peak_30580	chr4	915195	915939	-1.87913	6.59623e-06	Promoter (<=1kb)	GAK
Peak_15551	chr19	3047428	3047981	-1.87762	0.0163183	Promoter (<=1kb)	TLE2
Peak_27400	chr12	12010349	12010825	-1.87621	0.0031063	Distal Intergenic	BCL2L14
Peak_19287	chr12	49089712	49090667	-1.87444	0.000851889	Promoter (<=1kb)	LOC105369759
Peak_15836	chr2	176140379	176140995	-1.87299	0.0115619	Intron (ENST00000432796.2/3232, intron 1 of 1)	HOXD-AS2
Peak_15596	chr7	141074191	141074956	-1.86812	0.039766	Promoter (<=1kb)	TMEM178B
Peak_5147	chr12	63667451	63669478	-1.86747	0.00941977	Promoter (<=1kb)	DPY19L2
Peak_25616	chr2	201260036	201260438	-1.86403	0.0060326	Promoter (<=1kb)	CASP8
Peak_29373	chr19	17523449	17523760	-1.86224	0.00588877	Promoter (<=1kb)	NIBAN3
Peak_9868	chr2	234950826	234951800	-1.86028	0.000225363	Promoter (<=1kb)	SH3BP4
Peak_16088	chr12	8180176	8180690	-1.85983	0.0478262	Promoter (<=1kb)	FAM66C
Peak_21078	chr12	111402988	111403395	-1.858	0.0095912	Exon (ENST00000552663.2/105369984, exon 3 of 3)	SH2B3
Peak_22205	chr2	208406729	208407222	-1.857	0.0496602	Promoter (<=1kb)	PTH2R
Peak_10327	chr4	117085032	117086032	-1.85135	0.0038939	Promoter (<=1kb)	TRAM1L1
Peak_26979	chr19	46616662	46616991	-1.84889	0.00631915	Distal Intergenic	PTGIR
Peak_18293	chr12	64824134	64825191	-1.848	0.0327466	Promoter (<=1kb)	TBC1D30
Peak_28292	chr11	47400431	47400705	-1.84529	0.0240222	Promoter (<=1kb)	MIR4487
Peak_36479	chr10	15083931	15084114	-1.84168	0.00494541	Intron (ENST00000356189.6/414149, intron 1 of 3)	ACBD7
Peak_29170	chr19	31339495	31339793	-1.84063	0.0184345	Intron (ENST00000651361.1/57616, intron 1 of 6)	TSHZ3-AS1
Peak_12519	chr11	84719938	84721396	-1.83871	0.0127942	Promoter (<=1kb)	DLG2
Peak_18897	chr6	1604273	1605489	-1.83847	0.000878921	Promoter (<=1kb)	FOXCUT
Peak_39463	chr1	34928790	34929604	-1.83777	0.0311364	Promoter (<=1kb)	DLGAP3
Peak_29066	chr7	28685219	28685595	-1.83766	0.0122989	Promoter (<=1kb)	CREB5
Peak_29100	chr11	124725337	124726012	-1.83756	0.00569674	Distal Intergenic	NRGN
Peak_26716	chr6	167833269	167833518	-1.83638	0.0448802	Intron (ENST00000683244.1/4301, intron 1 of 33)	AFDN
Peak_18979	chr12	53751385	53752289	-1.83134	0.000303726	Promoter (<=1kb)	CISTR
Peak_32978	chr3	126287555	126288160	-1.82895	0.00505759	Exon (ENST00000511512.1/107986124, exon 2 of 3)	KLF15
Peak_24822	chr19	2281782	2282469	-1.82441	0.0230856	Promoter (<=1kb)	PEAK3
Peak_19758	chr12	5887900	5888523	-1.82416	0.00184317	Intron (ENST00000546188.5/57101, intron 3 of 24)	ANO2
Peak_29209	chr2	69582214	69582466	-1.8179	0.00493989	Intron (ENST00000606389.7/22848, intron 1 of 16)	AAK1
Peak_20623	chr8	15539828	15541028	-1.81652	0.010499	Promoter (<=1kb)	TUSC3
Peak_17775	chr1	152188779	152189580	-1.81638	0.0130879	Promoter (<=1kb)	FLG-AS1
Peak_30795	chr4	157220401	157220782	-1.81541	0.0455526	Promoter (<=1kb)	GRIA2
Peak_24128	chr10	8060666	8061018	-1.81504	0.0127892	Intron (ENST00000379328.9/2625, intron 3 of 5)	GATA3
Peak_12414	chr4	112515041	112516011	-1.81499	0.0285584	Promoter (<=1kb)	NEUROG2-AS1
Peak_20191	chr7	1506716	1507188	-1.81167	0.0184025	Distal Intergenic	INTS1
Peak_23820	chr5	116576394	116576758	-1.80929	0.0171325	Promoter (1-2kb)	SEMA6A-AS2
Peak_18094	chr5	172174937	172176023	-1.80871	0.000225363	Intron (ENST00000176763.10/6793, intron 1 of 18)	STK10
Peak_21834	chr15	41502386	41502970	-1.80528	0.00677691	Promoter (<=1kb)	ITPKA
Peak_11239	chr6	27312096	27313046	-1.80444	0.0426115	Promoter (<=1kb)	POM121L2
Peak_26611	chr10	118669196	118669787	-1.80415	0.00299294	Distal Intergenic	CACUL1
Peak_34829	chr6	140897886	140898161	-1.80363	0.0405958	Promoter (<=1kb)	LOC102723724
Peak_17637	chr1	161727190	161727795	-1.80317	0.00496892	Promoter (1-2kb)	FCRLB
Peak_38717	chr19	35436325	35436731	-1.80282	0.0408654	Promoter (1-2kb)	LOC101927522
Peak_15609	chr8	47188433	47189357	-1.80189	0.0181502	Promoter (<=1kb)	LOC100287846
Peak_29252	chr5	55821849	55822166	-1.79996	0.0149382	Distal Intergenic	IL31RA
Peak_16908	chr17	50055107	50057034	-1.79978	0.000202955	Promoter (<=1kb)	PICART1
Peak_34130	chr16	56643422	56643735	-1.79853	0.0267419	Promoter (<=1kb)	MT1DP
Peak_34398	chr20	53934465	53934838	-1.79636	0.00847033	Distal Intergenic	SUMO1P1
Peak_30999	chr17	62653451	62653943	-1.79481	0.000673808	Intron (ENST00000303375.10/9902, intron 1 of 29)	MRC2
Peak_22523	chr19	6100235	6100709	-1.79322	0.000698925	Intron (ENST00000303657.10/5990, intron 1 of 17)	RFX2
Peak_23869	chr7	93043339	93043589	-1.789	0.0348142	Distal Intergenic	SAMD9
Peak_8901	chr6	52577176	52578093	-1.78815	0.00437083	Promoter (<=1kb)	TRAM2-AS1
Peak_15357	chr3	24677822	24678590	-1.78801	0.000423411	Intron (ENST00000630391.1/ENST00000630391.1, intron 4 of 4)	RARB
Peak_18636	chr18	8367294	8367923	-1.78637	0.0116656	Promoter (<=1kb)	LOC100192426
Peak_24691	chr11	45664452	45665651	-1.78475	0.0380892	Promoter (<=1kb)	CHST1
Peak_32866	chr2	205684885	205685145	-1.78395	0.040977	Promoter (<=1kb)	NRP2
Peak_18186	chr2	84880098	84881081	-1.78288	0.0229892	Promoter (<=1kb)	TRABD2A
Peak_22633	chr1	53062317	53062827	-1.78194	0.0451499	Promoter (<=1kb)	PODN
Peak_5431	chr11	101914373	101916222	-1.77846	0.00207097	Promoter (<=1kb)	CEP126
Peak_18894	chr6	10416873	10417373	-1.77667	0.0483857	Promoter (<=1kb)	TFAP2A
Peak_22145	chr7	130956766	130957243	-1.77655	0.000555813	Intron (ENST00000642963.1/378805, intron 3 of 6)	LINC-PINT
Peak_21627	chr2	64859866	64860354	-1.7762	0.00086736	Intron (ENST00000445865.1/101927438, intron 1 of 4)	LINC01800
Peak_20719	chr6	75935085	75935693	-1.7759	0.0200852	Promoter (<=1kb)	IMPG1
Peak_26747	chr4	184534855	184535094	-1.77567	0.0019608	Intron (ENST00000605270.6/105377585, intron 1 of 2)	LINC02427
Peak_21501	chr12	57621195	57621948	-1.77498	0.0475418	Promoter (<=1kb)	SLC26A10
Peak_25334	chr4	182139689	182139968	-1.77373	0.0437903	Intron (ENST00000509012.5/90768, intron 1 of 4)	TENM3-AS1
Peak_18475	chr19	15106824	15107333	-1.77208	0.00975296	Promoter (<=1kb)	SYDE1
Peak_22627	chr1	3170763	3171703	-1.77193	0.00352063	Intron (ENST00000511072.5/63976, intron 1 of 15)	MIR4251
Peak_29586	chr2	197293344	197293825	-1.77145	0.00358763	Intron (ENST00000282272.15/91526, intron 1 of 27)	ANKRD44-IT1
Peak_26686	chr15	67039501	67039754	-1.76918	0.00299294	Intron (ENST00000558071.2/102723493, intron 1 of 4)	LOC102723493
Peak_33863	chr2	26741360	26741687	-1.76833	0.0483235	Distal Intergenic	SLC35F6
Peak_26288	chr4	123443876	123444678	-1.76812	0.000807151	Distal Intergenic	SPRY1
Peak_25809	chr4	105895751	105896718	-1.7671	0.0456933	Promoter (<=1kb)	INTS12
Peak_31026	chr3	31213954	31214467	-1.7663	0.0302861	Distal Intergenic	MIR466
Peak_22006	chr7	140639783	140640412	-1.76529	0.0401728	Promoter (<=1kb)	DENND2A
Peak_32947	chr22	19765749	19766003	-1.7615	0.0406804	Promoter (<=1kb)	TBX1
Peak_53151	chr5	125205826	125206166	-1.76004	0.00612796	Intron (ENST00000647105.1/101927421, intron 2 of 6)	LOC101927421
Peak_22602	chr1	112849653	112850393	-1.75954	0.0215468	Promoter (<=1kb)	LINC01356
Peak_23268	chr9	31908647	31909249	-1.75947	0.0459871	Distal Intergenic	ACO1
Peak_24487	chr10	103693363	103693870	-1.7567	0.0034873	Promoter (<=1kb)	SH3PXD2A
Peak_12754	chr17	5500197	5501395	-1.75641	0.001784	Promoter (<=1kb)	LOC728392
Peak_18101	chr17	63752033	63752401	-1.7552	0.00402587	Promoter (<=1kb)	STRADA
Peak_14359	chr19	48322223	48322758	-1.75381	0.0203692	Promoter (<=1kb)	ODAD1
Peak_17264	chr18	75455483	75456646	-1.75326	0.000364315	Promoter (<=1kb)	LOC107985177
Peak_22413	chr12	6532270	6532622	-1.75185	0.00290703	Promoter (<=1kb)	GAPDH-DT
Peak_19268	chr11	110710743	110711279	-1.75117	0.0120732	Promoter (<=1kb)	ARHGAP20
Peak_22354	chr1	26700805	26701003	-1.75104	0.0388896	Intron (ENST00000430799.7/8289, intron 1 of 19)	ARID1A
Peak_28275	chr12	48981155	48981689	-1.75017	0.0149952	3' UTR	WNT1
Peak_32682	chr17	2058556	2058970	-1.7474	0.00333895	3' UTR	HIC1
Peak_9695	chr11	119356437	119357114	-1.74677	0.0114314	3' UTR	USP2
Peak_16676	chr1	53328160	53328525	-1.74656	0.0199	Promoter (<=1kb)	LRP8-DT
Peak_30505	chr3	46701352	46701733	-1.74607	0.00775353	Promoter (<=1kb)	TMIE
Peak_33589	chr6	148557653	148558104	-1.74469	0.00379635	Distal Intergenic	SASH1
Peak_25003	chr9	96022053	96022776	-1.74303	0.0161903	Promoter (<=1kb)	LINC00092
Peak_25171	chr9	134771010	134771565	-1.73906	0.000807151	Exon (ENST00000666389.1/ENST00000666389.1, exon 2 of 2)	COL5A1
Peak_33564	chr18	54852573	54853188	-1.73566	0.0318913	Intron (ENST00000586570.5/5874, intron 2 of 4)	RAB27B
Peak_13695	chr2	73284429	73285351	-1.73424	0.010283	Promoter (<=1kb)	FBXO41
Peak_22467	chr3	169354235	169355365	-1.73161	0.0286956	Intron (ENST00000651503.2/2122, intron 2 of 16)	MECOM
Peak_14936	chr21	38639301	38640077	-1.7313	0.0185626	Intron (ENST00000398910.5/2078, intron 1 of 10)	ERG
Peak_20434	chr13	113001291	113001920	-1.73111	2.76393e-05	Promoter (<=1kb)	MCF2L
Peak_48391	chr7	25895129	25895484	-1.73027	0.00398837	Distal Intergenic	MIR148A
Peak_24920	chr4	13547120	13547849	-1.72801	0.0170934	Exon (ENST00000501050.1/ENST00000501050.1, exon 1 of 2)	NKX3-2
Peak_34975	chr1	15386277	15386646	-1.72628	0.00411069	Intron (ENST00000683790.1/114827, intron 31 of 33)	FHAD1
Peak_18850	chr2	96145620	96146276	-1.72415	2.22993e-05	Promoter (<=1kb)	DUSP2
Peak_20688	chr1	111507668	111508382	-1.72406	0.0228735	Intron (ENST00000369717.8/57413, intron 1 of 5)	TMIGD3
Peak_35441	chr10	86413208	86413517	-1.7237	0.0229832	Distal Intergenic	WAPL
Peak_19818	chr12	64390213	64390835	-1.72336	0.00153254	Promoter (<=1kb)	C12orf56
Peak_14741	chr2	174326304	174327171	-1.72307	0.0193362	Promoter (<=1kb)	LINC01305
Peak_21004	chr16	56589011	56589809	-1.72043	0.00241719	Promoter (<=1kb)	MT3
Peak_26496	chr18	64270228	64270699	-1.71983	5.53463e-05	Intron (ENST00000589376.1/284294, intron 3 of 9)	LINC01538
Peak_27774	chr17	76515671	76515847	-1.71909	0.0135391	Distal Intergenic	PRCD
Peak_31940	chr13	71613258	71613564	-1.71841	0.00107284	Intron (ENST00000611519.4/1602, intron 3 of 7)	DACH1
Peak_7305	chr1	224434649	224435813	-1.71699	0.0377277	Promoter (<=1kb)	CNIH3
Peak_13689	chr1	41516319	41516924	-1.71688	0.000653385	Intron (ENST00000643665.1/59269, intron 6 of 7)	EDN2
Peak_29337	chr3	58074397	58074777	-1.71592	0.000609537	Intron (ENST00000682097.1/2317, intron 1 of 12)	FLNB
Peak_24261	chr9	32344566	32344907	-1.71574	0.00198583	Distal Intergenic	ACO1
Peak_28812	chr7	150787567	150787885	-1.71295	0.00514477	Distal Intergenic	TMEM176B
Peak_19954	chr5	140926707	140927405	-1.7128	0.0456942	Promoter (<=1kb)	PCDHAC1
Peak_20931	chr8	38553862	38554533	-1.71244	0.0310196	Promoter (<=1kb)	LOC105379383
Peak_38305	chr8	38527600	38528013	-1.71108	0.0187835	Promoter (<=1kb)	C8orf86
Peak_33758	chr8	67968886	67969143	-1.71079	0.0498287	Intron (ENST00000288368.5/80243, intron 1 of 39)	PREX2
Peak_20698	chr19	4089069	4089890	-1.71068	9.662e-07	Distal Intergenic	MAP2K2
Peak_26629	chr17	76791434	76792012	-1.70487	0.000768248	Distal Intergenic	LINC02080
Peak_6545	chr17	75855517	75856631	-1.70352	0.0274688	Promoter (<=1kb)	WBP2
Peak_29310	chr15	70492257	70492916	-1.70136	0.0046804	Distal Intergenic	LINC02205
Peak_32423	chr1	32924824	32925344	-1.70114	0.00889697	Distal Intergenic	TMEM54
Peak_18764	chr14	77498315	77499477	-1.70016	0.00199288	Promoter (<=1kb)	ISM2
Peak_4827	chr8	91039968	91040882	-1.69909	0.0134714	Promoter (<=1kb)	PIP4P2
Peak_29553	chr11	70397638	70398425	-1.69864	0.00494613	Promoter (<=1kb)	CTTN
Peak_12448	chr5	139711505	139712224	-1.69802	0.000415476	Intron (ENST00000515296.1/84249, intron 2 of 5)	PSD2
Peak_19978	chr7	4144502	4145349	-1.69745	0.0422503	Intron (ENST00000404826.7/221935, intron 28 of 44)	LOC105375131
Peak_24683	chr11	125496101	125496618	-1.69408	0.0268239	Promoter (<=1kb)	FEZ1
Peak_22670	chr11	830390	830773	-1.69193	0.0226139	Promoter (<=1kb)	CRACR2B
Peak_24219	chr4	42396609	42397282	-1.69136	0.00732695	Promoter (<=1kb)	SHISA3
Peak_24268	chr17	55845234	55845875	-1.68952	0.00988229	Intron (ENST00000571972.1/ENST00000571972.1, intron 2 of 2)	ANKFN1
Peak_2531	chr3	182793478	182795561	-1.68939	0.0022281	Promoter (<=1kb)	ATP11B
Peak_24168	chr13	79382350	79382890	-1.68899	0.0215616	Intron (ENST00000438724.5/64062, intron 1 of 20)	RBM26
Peak_20050	chr2	161414238	161415064	-1.6837	0.0102489	Promoter (1-2kb)	TBR1
Peak_26313	chr5	132819433	132820021	-1.68006	0.00124949	Distal Intergenic	SHROOM1
Peak_26653	chr5	173327142	173327741	-1.67912	0.0447282	Promoter (<=1kb)	STC2
Peak_19380	chr2	96116548	96117482	-1.67847	0.0477062	Promoter (<=1kb)	ADRA2B
Peak_30780	chr5	35664613	35664907	-1.6784	0.0475418	Intron (ENST00000282469.10/79925, intron 8 of 9)	SPEF2
Peak_22457	chr6	165634005	165634665	-1.67778	0.00781104	Intron (ENST00000366882.6/10846, intron 1 of 21)	PDE10A
Peak_20132	chr5	124649927	124650466	-1.67457	0.0432664	Intron (ENST00000513986.2/57507, intron 3 of 9)	ZNF608
Peak_40612	chr6	156013422	156013817	-1.67435	0.0300738	Intron (ENST00000663591.1/101928923, intron 3 of 3)	MIR1202
Peak_6284	chr6	68633872	68635012	-1.67279	0.0364202	Promoter (<=1kb)	ADGRB3-DT
Peak_24457	chr6	40719800	40720103	-1.67169	0.0352655	Distal Intergenic	LOC101929535
Peak_9801	chr2	113583369	113584169	-1.67133	0.0396232	Promoter (<=1kb)	MIR1302-3
Peak_24028	chr4	109046489	109047159	-1.67129	0.0146366	Intron (ENST00000399132.6/84570, intron 5 of 37)	COL25A1
Peak_22469	chr5	143222471	143223176	-1.6706	6.36664e-07	3' UTR	ARHGAP26
Peak_11641	chr11	61890370	61891576	-1.66904	0.00318681	Promoter (<=1kb)	FADS3
Peak_20090	chr6	142902675	142902937	-1.66892	0.0254474	Intron (ENST00000012134.7/3097, intron 1 of 8)	HIVEP2
Peak_9093	chr19	4456469	4457303	-1.66798	0.0330778	Promoter (<=1kb)	UBXN6
Peak_20515	chr19	3042517	3042874	-1.66724	0.0226398	Intron (ENST00000426948.6/7089, intron 1 of 18)	TLE2
Peak_30218	chr6	3229731	3229991	-1.66723	0.0138277	Promoter (1-2kb)	LOC100422781
Peak_9631	chr17	63697895	63699743	-1.66674	0.000367667	Promoter (<=1kb)	LIMD2
Peak_29649	chr1	10716425	10716657	-1.6667	0.00905718	Intron (ENST00000377022.8/54897, intron 2 of 20)	CASZ1
Peak_19544	chr10	21174109	21174915	-1.66647	0.0360369	Promoter (<=1kb)	NEBL-AS1
Peak_16316	chr3	57164369	57165411	-1.66528	0.0483424	Promoter (<=1kb)	IL17RD
Peak_13113	chr1	231040363	231041232	-1.66489	0.0267419	Promoter (<=1kb)	FAM89A
Peak_21516	chr13	20193169	20194055	-1.66414	0.0223226	Promoter (<=1kb)	GJB2
Peak_49171	chr22	30267417	30267757	-1.66375	0.0498085	Promoter (<=1kb)	OSM
Peak_32778	chr19	18429502	18430010	-1.66336	0.00159186	Promoter (1-2kb)	SSBP4
Peak_22709	chr15	100879003	100879587	-1.66331	0.0445685	Promoter (<=1kb)	ALDH1A3
Peak_14643	chr8	97560000	97560467	-1.66148	0.0211094	Distal Intergenic	MTDH
Peak_11781	chr20	40968885	40969372	-1.66137	0.0365972	Distal Intergenic	TOP1
Peak_25417	chr13	48492491	48492870	-1.66137	0.0303528	Promoter (<=1kb)	RCBTB2
Peak_19587	chr1	239457710	239458545	-1.65988	0.048172	Intron (ENST00000468573.5/1131, intron 1 of 8)	CHRM3
Peak_21050	chr1	247906445	247906871	-1.65928	0.00734666	Distal Intergenic	OR2W3
Peak_14100	chr8	26088801	26089592	-1.65872	0.0117779	Distal Intergenic	EBF2
Peak_26672	chr10	33309388	33309612	-1.65702	0.001713	Intron (ENST00000374875.5/8829, intron 2 of 15)	NRP1
Peak_22195	chr5	32725748	32726722	-1.65624	0.036946	Intron (ENST00000509104.5/4883, intron 2 of 5)	NPR3
Peak_11504	chr4	7068365	7069275	-1.65514	0.0184381	Promoter (<=1kb)	GRPEL1
Peak_15277	chr2	102250955	102251767	-1.65494	0.00107284	Distal Intergenic	IL1RL1
Peak_19055	chr18	22324093	22324772	-1.65326	0.00285418	Distal Intergenic	CTAGE1
Peak_37813	chr12	3454623	3454884	-1.65284	0.0450544	Intron (ENST00000452611.6/56341, intron 1 of 9)	PRMT8
Peak_27000	chr5	124057010	124057455	-1.65249	0.00972698	Distal Intergenic	LOC101927397
Peak_37835	chr3	177145235	177145596	-1.65105	0.00292643	Intron (ENST00000457928.7/79718, intron 1 of 15)	TBL1XR1
Peak_29643	chr5	67360171	67360565	-1.65094	0.00707548	Exon (ENST00000653057.1/ENST00000653057.1, exon 2 of 2)	LOC101928858
Peak_22224	chr22	24729109	24729575	-1.65081	0.00654458	Intron (ENST00000616349.4/440822, intron 13 of 19)	PIWIL3
Peak_35968	chr20	8457920	8458692	-1.64993	0.00250705	Intron (ENST00000637919.1/23236, intron 3 of 32)	PLCB1
Peak_7193	chr16	50152144	50153183	-1.64898	0.0230856	Promoter (<=1kb)	TENT4B
Peak_29375	chr2	160427996	160428285	-1.64827	0.00788596	Intron (ENST00000474820.5/5937, intron 2 of 15)	RBMS1
Peak_16550	chr9	125646587	125647262	-1.6479	0.0171133	Intron (ENST00000373511.6/79109, intron 4 of 10)	MAPKAP1
Peak_27482	chr4	153256958	153257577	-1.64758	0.000171953	Promoter (<=1kb)	TRIM2
Peak_15542	chr17	61411511	61413181	-1.64744	0.00249888	Promoter (<=1kb)	TBX2-AS1
Peak_24713	chr13	24680378	24681089	-1.64592	0.0298848	Promoter (<=1kb)	ATP12A
Peak_14832	chr4	41256570	41258318	-1.64503	4.06037e-05	Promoter (<=1kb)	UCHL1-DT
Peak_18758	chr13	98142133	98142907	-1.64427	0.0122939	Promoter (<=1kb)	FARP1
Peak_25102	chr21	15134903	15135428	-1.64335	0.00800244	Intron (ENST00000674143.1/107985483, intron 1 of 4)	LOC107985483
Peak_16551	chr11	33893261	33894976	-1.6418	7.56082e-06	Promoter (1-2kb)	LMO2
Peak_13382	chr2	25251214	25252272	-1.6403	0.00372248	Promoter (<=1kb)	DNMT3A
Peak_25315	chr14	32932554	32933410	-1.6382	0.0232576	Promoter (<=1kb)	NPAS3
Peak_26681	chr12	64583843	64584117	-1.63627	0.0448802	Intron (ENST00000637125.1/283349, intron 2 of 5)	RASSF3-DT
Peak_34506	chr16	57533385	57533771	-1.63521	0.00098047	Intron (ENST00000258214.3/92922, intron 1 of 8)	CCDC102A
Peak_17631	chr7	51315472	51316809	-1.63479	0.0483076	Promoter (<=1kb)	COBL
Peak_21091	chr14	76956057	76957081	-1.63434	0.0296091	Distal Intergenic	LINC01629
Peak_23702	chr17	63446274	63447130	-1.63002	0.0385913	Promoter (<=1kb)	CYB561
Peak_46411	chr11	57648260	57648830	-1.62974	0.0194474	Promoter (<=1kb)	CLP1
Peak_32562	chr12	92147419	92147738	-1.62924	0.0005324	Promoter (1-2kb)	BTG1-DT
Peak_31871	chr1	47592891	47593554	-1.62889	0.0136467	Distal Intergenic	LINC01738
Peak_18125	chr8	21959766	21960495	-1.6287	0.000162299	Intron (ENST00000252512.14/23039, intron 1 of 27)	XPO7
Peak_29239	chr5	135372800	135373228	-1.62785	0.00117665	Intron (ENST00000511689.5/9555, intron 2 of 8)	MACROH2A1
Peak_25496	chr16	11361751	11362071	-1.62617	0.0228479	Intron (ENST00000649869.1/105371082, intron 1 of 2)	LOC105371082
Peak_16620	chr15	65384850	65385739	-1.62519	0.0211094	Promoter (<=1kb)	IGDCC4
Peak_24609	chr10	103758014	103758292	-1.62509	0.0170145	Intron (ENST00000369774.8/9644, intron 3 of 14)	SH3PXD2A-AS1
Peak_12182	chr1	227887218	227888157	-1.62362	0.000805564	Distal Intergenic	MIR5008
Peak_44529	chr1	101128277	101128693	-1.62268	0.0228479	Distal Intergenic	LOC102606465
Peak_28934	chr1	37486730	37486984	-1.62265	0.0251495	Distal Intergenic	ZC3H12A
Peak_17462	chr12	110689226	110689857	-1.6222	0.0303658	Promoter (<=1kb)	HVCN1
Peak_12226	chr20	53591878	53593801	-1.62202	0.0085698	Promoter (<=1kb)	ZNF217
Peak_13332	chr1	36322930	36323651	-1.62172	0.0183772	Promoter (<=1kb)	EVA1B
Peak_27520	chr1	10888369	10888596	-1.62054	0.032149	Distal Intergenic	C1orf127
Peak_24554	chr10	80144581	80145132	-1.62037	0.0246478	Promoter (<=1kb)	PLAC9
Peak_29573	chr17	4714856	4715305	-1.62028	0.00860748	Promoter (<=1kb)	ARRB2
Peak_45773	chr15	59354626	59354939	-1.61958	0.000799731	Intron (ENST00000288235.9/4643, intron 1 of 27)	MYO1E
Peak_16626	chr2	26971039	26971569	-1.6194	0.00230673	Promoter (<=1kb)	MAPRE3
Peak_32669	chr16	85610649	85610887	-1.61832	0.0487649	Promoter (<=1kb)	GSE1
Peak_24256	chr5	139903685	139904539	-1.61757	0.0327698	Promoter (<=1kb)	NRG2
Peak_16855	chr8	141205743	141206632	-1.61667	0.00285418	Distal Intergenic	DENND3
Peak_39015	chr3	122975106	122975458	-1.61534	0.0110955	Promoter (<=1kb)	SEMA5B
Peak_24594	chr3	122233218	122233788	-1.61408	0.034169	Intron (ENST00000639785.2/846, intron 1 of 6)	CASR
Peak_34493	chr1	8427751	8428281	-1.61236	0.00156223	Intron (ENST00000449895.5/102724552, intron 1 of 3)	RERE-AS1
Peak_28323	chr4	140567679	140568233	-1.61205	0.0140047	Promoter (<=1kb)	UCP1
Peak_18539	chr6	144582991	144583731	-1.61193	1.37663e-05	Promoter (<=1kb)	UTRN
Peak_13646	chr5	140145951	140146590	-1.6115	0.00944405	Distal Intergenic	LOC101929719
Peak_39294	chr17	77400512	77400755	-1.61097	0.0117779	Promoter (<=1kb)	SEPTIN9
Peak_18529	chr11	120952530	120952994	-1.60885	0.0280745	Exon (ENST00000638419.1/2900, exon 15 of 21)	LOC101929227
Peak_6346	chr5	50665937	50668968	-1.60861	6.36664e-07	Promoter (<=1kb)	PARP8
Peak_10879	chr10	47383910	47385241	-1.60815	0.029286	Promoter (<=1kb)	ZNF488
Peak_40517	chr12	32522523	32522915	-1.60685	0.0174258	Intron (ENST00000534526.7/121512, intron 1 of 16)	FGD4
Peak_22228	chr4	158599086	158599490	-1.60567	0.00744883	5' UTR	RXFP1
Peak_35209	chr17	65029802	65030178	-1.60474	0.00424986	Intron (ENST00000439174.7/10672, intron 2 of 3)	GNA13
Peak_15501	chr11	107928504	107929428	-1.60431	0.0236043	Promoter (<=1kb)	RAB39A
Peak_27055	chr20	63567624	63568028	-1.60178	0.000639924	Promoter (<=1kb)	HELZ2
Peak_18796	chr17	43645915	43646602	-1.60152	0.00635853	Intron (ENST00000318579.9/4222, intron 1 of 2)	MEOX1
Peak_26890	chr6	131199999	131200203	-1.59986	0.0321477	Promoter (<=1kb)	AKAP7
Peak_31480	chr4	81505601	81506048	-1.59968	0.0207531	Intron (ENST00000638048.1/153020, intron 4 of 16)	RASGEF1B
Peak_34546	chr10	33661727	33662309	-1.59921	0.00169489	Distal Intergenic	LINC02628
Peak_23861	chr7	4809115	4809573	-1.59789	0.0380892	Intron (ENST00000445392.5/55698, intron 9 of 14)	RADIL
Peak_39471	chr3	65356603	65356956	-1.59762	0.0139235	3' UTR	MAGI1
Peak_17460	chr11	849260	849580	-1.59584	0.00726425	Promoter (<=1kb)	TSPAN4
Peak_17879	chr16	57984569	57984997	-1.59536	0.0155984	Promoter (<=1kb)	TEPP
Peak_19423	chr6	26613754	26614769	-1.59465	0.0204307	Distal Intergenic	LOC105374989
Peak_22096	chr2	182866266	182867616	-1.59407	0.00385376	Promoter (<=1kb)	FRZB
Peak_25652	chr19	3133046	3133394	-1.5939	0.00298487	Distal Intergenic	GNA15
Peak_30307	chr9	134396603	134396864	-1.59344	0.0081687	Intron (ENST00000484822.1/6256, intron 2 of 2)	RXRA
Peak_35694	chr6	164396608	164396968	-1.59058	0.0226139	Distal Intergenic	MEAT6
Peak_43156	chr3	13933175	13933510	-1.58941	0.00934838	Promoter (<=1kb)	FGD5P1
Peak_8512	chr12	53053828	53054559	-1.58541	0.0390469	Promoter (<=1kb)	TNS2
Peak_14217	chr10	75396392	75397174	-1.58364	0.0060125	Intron (ENST00000418818.6/84858, intron 1 of 3)	ZNF503
Peak_9104	chr4	105713927	105714653	-1.58237	0.0170099	Promoter (1-2kb)	GSTCD
Peak_9913	chr15	40308014	40309463	-1.58151	0.00228743	Promoter (<=1kb)	PLCB2
Peak_20192	chr7	155805317	155805882	-1.58029	0.0211867	Promoter (1-2kb)	SHH
Peak_14757	chr3	12868035	12869054	-1.57957	0.00493519	Intron (ENST00000454887.1/23066, intron 3 of 3)	LINC02022
Peak_22400	chr5	95027584	95028010	-1.57953	0.00829827	Intron (ENST00000515393.5/79772, intron 1 of 22)	MCTP1
Peak_18189	chr12	6532774	6533217	-1.57864	0.0160166	Promoter (<=1kb)	GAPDH-DT
Peak_25507	chr7	111987368	111987723	-1.57863	0.032085	Intron (ENST00000428084.6/9732, intron 6 of 52)	DOCK4
Peak_28775	chr12	116559567	116559829	-1.5771	0.0108178	Promoter (<=1kb)	MAP1LC3B2
Peak_16592	chr11	75873199	75874332	-1.57637	1.14135e-05	Intron (ENST00000356136.8/7405, intron 3 of 14)	UVRAG
Peak_25875	chr1	1034131	1034419	-1.57617	0.0336907	Promoter (<=1kb)	AGRN
Peak_26235	chr20	49979156	49979381	-1.57587	0.0445031	Distal Intergenic	SNAI1
Peak_40847	chr3	8623220	8623556	-1.57567	0.0198324	3' UTR	SSUH2
Peak_20144	chr2	68362222	68362692	-1.57455	0.00493989	Exon (ENST00000366218.2/101927723, exon 2 of 2)	PLEK
Peak_23767	chr2	43831586	43831884	-1.57355	0.04344	Promoter (<=1kb)	ABCG8
Peak_30761	chr4	81648734	81649162	-1.57342	0.0168709	Intron (ENST00000638048.1/153020, intron 3 of 16)	RASGEF1B
Peak_20662	chr9	131733465	131733941	-1.57003	0.00077335	Intron (ENST00000372189.7/2889, intron 1 of 23)	RAPGEF1
Peak_24109	chr19	42198979	42200300	-1.5696	2.20326e-06	3' UTR	POU2F2
Peak_22500	chr10	74739139	74739500	-1.56918	0.00883939	Distal Intergenic	KAT6B
Peak_35704	chr3	111911539	111911711	-1.56894	0.00494541	Promoter (<=1kb)	PHLDB2
Peak_20602	chr7	140640767	140641204	-1.56867	0.0363502	Promoter (<=1kb)	LOC107986718
Peak_26321	chr5	172701493	172701939	-1.56863	0.00905718	Distal Intergenic	LOC107986479
Peak_27481	chr3	50624215	50624758	-1.56627	0.00176989	Intron (ENST00000446044.5/7867, intron 4 of 12)	MAPKAPK3
Peak_9964	chr19	17390335	17391141	-1.5659	0.0379636	Exon (ENST00000636079.1/110806280, exon 4 of 4)	CCDC194
Peak_25100	chr8	97259605	97260060	-1.56503	0.000629131	Distal Intergenic	TSPYL5
Peak_20215	chr2	126776451	126776693	-1.56463	0.0302712	Distal Intergenic	GYPC
Peak_25457	chr1	117359534	117360248	-1.56453	0.0109778	Distal Intergenic	MAN1A2
Peak_20844	chr6	5850762	5851698	-1.56136	0.0103553	Exon (ENST00000454882.2/ENST00000454882.2, exon 1 of 3)	NRN1
Peak_21079	chr12	48818775	48819293	-1.56045	0.0106195	Promoter (<=1kb)	CACNB3
Peak_20530	chr19	704311	704626	-1.55943	0.0179902	Distal Intergenic	PALM
Peak_17725	chr21	16264134	16264805	-1.5579	0.00250074	Intron (ENST00000635845.1/388815, intron 4 of 5)	MIR99AHG
Peak_17246	chr14	32938022	32938721	-1.55735	0.0127654	Promoter (<=1kb)	NPAS3
Peak_21459	chr17	29722392	29722934	-1.55734	0.00138998	Intron (ENST00000269033.7/85464, intron 2 of 14)	SSH2
Peak_21842	chr15	90660775	90661135	-1.55708	0.0129963	Promoter (<=1kb)	LINC01585
Peak_16129	chr19	13012612	13013618	-1.55568	0.000235828	Promoter (<=1kb)	NFIX
Peak_20733	chr3	169348634	169349862	-1.55554	0.0012069	Intron (ENST00000651503.2/2122, intron 2 of 16)	MECOM
Peak_30513	chr2	230124861	230125140	-1.55482	0.0109769	Promoter (<=1kb)	LOC107985997
Peak_24896	chr22	24806161	24806820	-1.55454	0.0222721	Promoter (<=1kb)	SGSM1
Peak_19563	chr6	129490618	129491120	-1.55444	0.0330508	Promoter (<=1kb)	LAMA2
Peak_15018	chr3	127547940	127548577	-1.55338	0.0164822	Distal Intergenic	LINC02034
Peak_41061	chr15	81182904	81183255	-1.55292	0.0203573	Promoter (<=1kb)	IL16
Peak_54145	chr9	124292001	124292348	-1.55257	0.000546288	Promoter (<=1kb)	NEK6
Peak_23392	chr1	198174345	198174901	-1.54898	0.000851889	Intron (ENST00000442588.5/140609, intron 1 of 3)	NEK7
Peak_30281	chr8	54469991	54470561	-1.54884	0.0456331	Exon (ENST00000610741.1/ENST00000610741.1, exon 2 of 2)	SOX17
Peak_39868	chr3	52498473	52498770	-1.54827	0.00421928	Intron (ENST00000321725.10/23166, intron 1 of 68)	STAB1
Peak_21111	chr16	85610930	85611217	-1.54801	0.0458516	Promoter (<=1kb)	GSE1
Peak_21732	chr8	105188172	105188864	-1.54759	0.0154126	Promoter (<=1kb)	LOC101927392
Peak_9972	chr19	58009262	58010503	-1.54651	0.00680176	Exon (ENST00000550135.5/100128398, exon 3 of 3)	LOC100128398
Peak_23056	chr2	25132107	25132421	-1.54622	0.0300738	Intron (ENST00000403714.8/22979, intron 10 of 22)	EFR3B
Peak_21371	chr12	47307024	47307991	-1.54579	6.69489e-05	Distal Intergenic	LOC105369746
Peak_19660	chr11	14973589	14974893	-1.54532	0.0395381	Promoter (1-2kb)	CALCA
Peak_13896	chr12	52022584	52024344	-1.54309	0.000116272	Promoter (<=1kb)	NR4A1
Peak_19428	chr6	41545560	41546240	-1.54177	0.0112145	Promoter (<=1kb)	FOXP4-AS1
Peak_23279	chr19	33077966	33078382	-1.54092	0.00972583	Distal Intergenic	GPATCH1
Peak_12782	chr3	42501416	42502826	-1.54086	0.00319206	Promoter (<=1kb)	VIPR1
Peak_23378	chr9	121271809	121272075	-1.54028	0.0229832	Intron (ENST00000373823.7/2934, intron 8 of 24)	GSN
Peak_27287	chr1	18923980	18924243	-1.53929	0.00441809	Intron (ENST00000455833.7/126917, intron 1 of 8)	IFFO2
Peak_5555	chr10	71319251	71320116	-1.53911	0.0227267	Promoter (<=1kb)	SLC29A3
Peak_24548	chr12	27549588	27550037	-1.5382	0.0215763	Intron (ENST00000538433.5/8496, intron 1 of 4)	PPFIBP1
Peak_21829	chr15	100880264	100880769	-1.53698	0.0477062	Promoter (<=1kb)	ALDH1A3
Peak_18616	chr9	87148352	87149050	-1.53639	0.00617327	Promoter (<=1kb)	LINC02872
Peak_4034	chr19	13095221	13098221	-1.5357	1.37263e-05	3' UTR	LYL1
Peak_36538	chr11	46295234	46295526	-1.53541	0.013604	Promoter (<=1kb)	CREB3L1
Peak_22955	chr9	121736068	121736479	-1.53537	0.048288	Promoter (<=1kb)	DAB2IP
Peak_19952	chr5	132822902	132823375	-1.53478	0.0013487	Promoter (<=1kb)	SHROOM1
Peak_16905	chr9	13568710	13569416	-1.53391	0.0393121	Intron (ENST00000664438.1/105375977, intron 2 of 2)	LINC01235
Peak_17023	chr4	184039890	184040619	-1.53294	0.00307944	Distal Intergenic	STOX2
Peak_9054	chr10	70816278	70816982	-1.5321	0.00860903	Promoter (<=1kb)	SGPL1
Peak_23095	chr2	197255708	197256422	-1.5314	0.0124441	Intron (ENST00000282272.15/91526, intron 1 of 27)	ANKRD44-IT1
Peak_28580	chr2	237678181	237678376	-1.53122	0.0245648	Intron (ENST00000308482.14/9208, intron 1 of 23)	LRRFIP1
Peak_20717	chr16	58755855	58756579	-1.5312	0.01119	Exon (ENST00000568134.6/107984867, exon 3 of 4)	LOC107984867
Peak_18648	chr2	111118306	111119796	-1.53081	5.15403e-06	Promoter (<=1kb)	BCL2L11
Peak_6050	chr3	169659798	169662881	-1.53062	0.00110504	Promoter (<=1kb)	MECOM
Peak_22122	chr5	39076960	39077674	-1.53016	0.0131305	Distal Intergenic	RICTOR
Peak_16894	chr20	33444541	33444920	-1.52847	0.0465547	Promoter (<=1kb)	SNTA1
Peak_35529	chr2	45263406	45263627	-1.5278	0.0306567	Intron (ENST00000427020.6/400952, intron 2 of 7)	LINC01121
Peak_17008	chr11	13338063	13338568	-1.52758	0.0293252	Intron (ENST00000529050.5/406, intron 2 of 2)	ARNTL
Peak_14483	chr13	21075020	21075856	-1.52463	0.019544	Distal Intergenic	LATS2
Peak_7685	chr21	46459575	46460436	-1.52379	0.0155598	Promoter (<=1kb)	DIP2A
Peak_8110	chr13	91346633	91348147	-1.52263	0.024186	Promoter (<=1kb)	MIR17HG
Peak_10850	chr12	55743453	55744672	-1.52055	0.00379635	Promoter (<=1kb)	GDF11
Peak_35597	chr6	166439929	166440438	-1.52049	0.00340195	Exon (ENST00000491836.2/6196, exon 4 of 4)	RPS6KA2
Peak_35502	chr19	11421139	11421706	-1.51985	0.00545351	Promoter (1-2kb)	RGL3
Peak_21399	chr1	100463856	100464143	-1.51949	0.0393121	Intron (ENST00000644844.1/8556, intron 9 of 15)	CDC14A
Peak_16133	chr19	31350139	31351951	-1.51948	0.0355683	Promoter (<=1kb)	TSHZ3
Peak_25212	chr11	9004201	9004592	-1.51815	0.0388896	Promoter (<=1kb)	NRIP3-DT
Peak_26755	chr1	201282992	201283568	-1.51701	0.0226211	Promoter (<=1kb)	PKP1
Peak_9833	chr9	86945746	86949058	-1.51442	0.0286549	Promoter (<=1kb)	GAS1RR
Peak_14158	chr19	56066225	56067164	-1.51318	0.0426637	Promoter (<=1kb)	LINC01864
Peak_17866	chr14	69259464	69261166	-1.51235	0.0372246	Promoter (<=1kb)	GALNT16-AS1
Peak_29190	chr18	74631579	74631847	-1.51029	0.0222924	Promoter (<=1kb)	ZNF407
Peak_14438	chr7	158976841	158977352	-1.50954	0.0372246	Distal Intergenic	LINC00689
Peak_25666	chr5	136080046	136080535	-1.50903	0.0203343	Promoter (<=1kb)	VTRNA2-1
Peak_7937	chr22	39348980	39349874	-1.50864	0.00262408	Promoter (<=1kb)	SYNGR1
Peak_17253	chr16	84294276	84295259	-1.50812	0.00162315	Promoter (<=1kb)	WFDC1
Peak_14837	chr1	201480640	201482268	-1.50748	0.000845619	Distal Intergenic	CSRP1
Peak_26092	chr17	2852389	2852709	-1.50717	0.0271388	Intron (ENST00000637138.1/23108, intron 3 of 25)	RAP1GAP2
Peak_4957	chr6	27502210	27503750	-1.50661	0.00624189	Intron (ENST00000648816.1/ENST00000648816.1, intron 1 of 3)	LOC105375001
Peak_26767	chr7	154913917	154914531	-1.50654	0.0467701	Distal Intergenic	PAXIP1-AS2
Peak_943	chr19	27792738	27794941	-1.50652	0.00156502	Promoter (<=1kb)	LOC101927151
Peak_35652	chr5	137734046	137734496	-1.50603	0.0100318	Promoter (1-2kb)	KLHL3
Peak_17351	chr12	54303435	54304395	-1.50556	0.0144521	Intron (ENST00000553061.1/ENST00000553061.1, intron 1 of 1)	COPZ1
Peak_22169	chr10	34780876	34781160	-1.50428	0.0234094	Intron (ENST00000545260.5/56288, intron 1 of 22)	PARD3
Peak_19790	chr10	68561853	68562068	-1.50393	0.0187835	Promoter (1-2kb)	TET1
Peak_22290	chr1	205440931	205441301	-1.50374	0.0156377	5' UTR	MIR135B
Peak_35062	chr4	158810134	158810631	-1.50095	0.000303709	Intron (ENST00000264433.11/57600, intron 1 of 16)	FNIP2
Peak_7475	chr18	25352401	25353630	-1.50035	0.00525498	Promoter (<=1kb)	ZNF521
Peak_24649	chr1	29123218	29123698	-1.4998	0.0238887	Promoter (<=1kb)	TMEM200B
Peak_31024	chr3	16481363	16481757	-1.49868	0.0173517	Promoter (1-2kb)	RFTN1
Peak_19893	chr19	40811182	40812405	-1.49793	0.000206353	Promoter (<=1kb)	CYP2T1P
Peak_14822	chr11	10933943	10934846	-1.49662	0.0173302	Distal Intergenic	ZBED5-AS1
Peak_20988	chr3	133572569	133573243	-1.49631	0.0458786	Promoter (<=1kb)	CDV3
Peak_16725	chr10	43104706	43105620	-1.49528	0.0135391	Promoter (<=1kb)	RET
Peak_25918	chr1	44486052	44486432	-1.49523	0.0329145	Intron (ENST00000355387.6/55182, intron 2 of 14)	MIR5584
Peak_7866	chr5	117454786	117455891	-1.49383	0.0127165	Promoter (<=1kb)	LINC00992
Peak_32055	chr7	7867900	7868382	-1.4936	0.0138726	Exon (ENST00000638342.1/729852, exon 4 of 5)	GLCCI1-DT
Peak_58605	chr13	113854902	113855259	-1.49278	0.000531469	Intron (ENST00000327773.7/2621, intron 2 of 14)	GAS6
Peak_13151	chr18	23618831	23620023	-1.49269	5.24087e-05	Promoter (<=1kb)	ANKRD29
Peak_50353	chr6	38443504	38443665	-1.49086	0.0128207	Intron (ENST00000314100.10/114781, intron 5 of 9)	BTBD9-AS1
Peak_10778	chr22	37639481	37640302	-1.49058	0.0298735	Promoter (<=1kb)	SH3BP1
Peak_27595	chr10	61001532	61001937	-1.48905	0.0152226	Promoter (<=1kb)	RHOBTB1
Peak_12502	chr2	109031240	109032594	-1.48854	3.91681e-05	Distal Intergenic	EDAR
Peak_26518	chr2	237291357	237291937	-1.48658	0.0409705	Distal Intergenic	LOC105373953
Peak_26989	chr3	63960124	63960898	-1.48502	0.0228021	Intron (ENST00000674280.1/6314, intron 5 of 12)	ATXN7
Peak_17565	chr3	169666248	169666993	-1.48475	0.00837241	Distal Intergenic	MECOM
Peak_18863	chr22	20429433	20429871	-1.48475	0.0083663	Promoter (<=1kb)	SCARF2
Peak_21574	chr6	151808412	151808837	-1.48389	0.0493207	Promoter (<=1kb)	ESR1
Peak_27346	chr1	101079234	101079524	-1.48099	0.00481715	Intron (ENST00000451213.2/102606465, intron 3 of 4)	LOC102606465
Peak_15423	chr4	108167087	108169276	-1.48027	0.0403168	Promoter (<=1kb)	LEF1
Peak_21971	chr4	185127448	185128062	-1.47976	0.0464522	Exon (ENST00000665695.1/ENST00000665695.1, exon 1 of 2)	SLC25A4
Peak_7604	chr11	64304176	64305268	-1.47966	0.0410877	Promoter (<=1kb)	ESRRA
Peak_29381	chr4	41362088	41362346	-1.47867	0.00171373	Promoter (1-2kb)	LIMCH1
Peak_9140	chr14	21068648	21072316	-1.47821	8.64918e-06	Promoter (<=1kb)	ARHGEF40
Peak_23157	chr18	62420888	62421310	-1.47771	0.0250893	Distal Intergenic	TNFRSF11A
Peak_13305	chr3	57078131	57079304	-1.47752	0.0133938	Promoter (<=1kb)	ARHGEF3
Peak_35490	chr17	14428326	14428782	-1.47733	0.0406983	Distal Intergenic	LOC107985080
Peak_35426	chr1	32725038	32725274	-1.4758	0.00624189	Exon (ENST00000421619.1/ENST00000421619.1, exon 1 of 2)	KIAA1522
Peak_20173	chr2	239252864	239253537	-1.47504	0.000432364	Intron (ENST00000345617.7/9759, intron 2 of 26)	HDAC4
Peak_13422	chr19	18203105	18204175	-1.47479	0.0375083	Promoter (<=1kb)	RAB3A
Peak_24681	chr10	86971436	86972007	-1.47395	0.00163061	Promoter (<=1kb)	ADIRF-AS1
Peak_20356	chr1	19477176	19478048	-1.47363	0.000662382	Intron (ENST00000264202.8/832, intron 1 of 8)	MICOS10
Peak_28602	chr2	213119105	213119587	-1.47318	0.0157453	Intron (ENST00000451136.6/22807, intron 4 of 7)	IKZF2
Peak_28151	chr2	118223764	118224744	-1.47203	0.0203692	Promoter (1-2kb)	THORLNC
Peak_10717	chr3	24521043	24522833	-1.47025	1.50589e-05	Exon (ENST00000627154.2/644990, exon 3 of 3)	THRB-AS1
Peak_17231	chr9	136050885	136052347	-1.47001	7.82962e-05	Promoter (<=1kb)	NACC2
Peak_13568	chr16	67660977	67661597	-1.46774	0.0215925	Promoter (<=1kb)	PARD6A
Peak_6612	chr16	25257976	25259022	-1.46732	0.00878217	Promoter (<=1kb)	ZKSCAN2-DT
Peak_25411	chr9	34123388	34123853	-1.46716	0.00205658	Promoter (1-2kb)	DCAF12
Peak_4529	chr7	87599317	87601449	-1.46697	0.00647268	Promoter (<=1kb)	ABCB1
Peak_23603	chr11	62925818	62926743	-1.46464	0.0130879	Distal Intergenic	CHRM1
Peak_23287	chr2	237617242	237617486	-1.46314	0.0303199	Intron (ENST00000417947.1/ENST00000417947.1, intron 1 of 1)	LRRFIP1
Peak_22194	chr10	13718350	13718837	-1.46231	0.00241115	Intron (ENST00000357447.7/55691, intron 12 of 24)	LOC105376426
Peak_10468	chr22	27800178	27802936	-1.46223	0.00883939	Promoter (<=1kb)	MN1
Peak_27183	chr17	51238459	51238730	-1.46076	0.0107467	Intron (ENST00000586178.6/54799, intron 2 of 16)	MBTD1
Peak_15671	chr18	7822510	7822941	-1.46016	0.0465479	Intron (ENST00000332175.12/5797, intron 2 of 30)	PTPRM
Peak_21390	chr18	46433256	46433586	-1.4598	0.0485601	5' UTR	RNF165
Peak_10251	chr12	132559993	132561394	-1.45966	0.00289982	Promoter (<=1kb)	FBRSL1
Peak_13276	chr4	163549869	163550707	-1.45932	0.030503	Intron (ENST00000274056.11/55016, intron 4 of 5)	TMA16
Peak_18434	chr7	90210956	90212418	-1.45928	0.0412095	Promoter (<=1kb)	STEAP2-AS1
Peak_16390	chr1	27392572	27393192	-1.4582	0.0380283	Promoter (<=1kb)	GPR3
Peak_30050	chr2	219057559	219058137	-1.45702	0.0127892	Promoter (<=1kb)	MIR3131
Peak_17589	chr6	34235638	34236766	-1.45647	0.00568437	Promoter (<=1kb)	HMGA1
Peak_25331	chr2	11326568	11326923	-1.45628	0.012191	Intron (ENST00000315872.11/9475, intron 1 of 32)	ROCK2
Peak_8952	chr3	139677091	139678040	-1.45529	0.00558864	Promoter (<=1kb)	NMNAT3
Peak_24705	chr12	49342049	49343018	-1.45506	0.027238	Distal Intergenic	DNAJC22
Peak_16342	chr8	79890699	79892193	-1.45411	0.000364315	Exon (ENST00000669451.1/ENST00000669451.1, exon 1 of 3)	LOC101927040
Peak_23236	chr3	123618434	123618878	-1.4526	0.00136061	Promoter (1-2kb)	MYLK
Peak_18062	chr6	141483375	141484295	-1.45238	0.0201192	Distal Intergenic	LOC105378029
Peak_24976	chr7	5296975	5297309	-1.45161	0.0495712	Exon (ENST00000396872.8/222962, exon 7 of 11)	SLC29A4
Peak_20143	chr12	104049824	104050449	-1.45064	0.0315021	Promoter (<=1kb)	GLT8D2
Peak_21531	chr11	22432135	22433151	-1.44988	0.0484948	Distal Intergenic	LINC01495
Peak_13924	chr11	115975233	115976101	-1.44892	0.048288	Distal Intergenic	LINC02703
Peak_22789	chr19	18388138	18388598	-1.44869	0.0402904	Promoter (1-2kb)	GDF15
Peak_19863	chr17	6070968	6071466	-1.44773	0.0454273	Promoter (<=1kb)	WSCD1
Peak_21690	chr8	100471944	100472369	-1.44451	0.00118804	Distal Intergenic	LOC105375670
Peak_20745	chr8	102898386	102899265	-1.44265	5.75685e-06	Intron (ENST00000659614.1/100506753, intron 2 of 5)	AZIN1
Peak_21970	chr4	183906562	183907445	-1.44212	0.00744883	Promoter (1-2kb)	STOX2
Peak_38858	chr10	103911155	103911565	-1.44144	0.0102387	Intron (ENST00000224950.8/79991, intron 2 of 9)	STN1
Peak_19759	chr8	120749353	120750005	-1.44012	0.00077335	Intron (ENST00000395601.7/6641, intron 2 of 7)	LOC101927543
Peak_9729	chr9	34379464	34380729	-1.43946	0.00100393	Promoter (<=1kb)	C9orf24
Peak_20889	chr8	133498533	133499316	-1.43859	0.00028507	Promoter (<=1kb)	ST3GAL1
Peak_5610	chr19	1590845	1592689	-1.43754	0.00726425	Promoter (<=1kb)	MBD3
Peak_3659	chr5	81970717	81971871	-1.43719	0.013604	Promoter (<=1kb)	ATG10
Peak_28701	chr5	141491970	141492876	-1.43669	0.00191488	Intron (ENST00000517417.3/56114, intron 1 of 3)	PCDHGC5
Peak_15913	chr22	40384924	40385661	-1.43598	0.000225363	Intron (ENST00000636714.1/158, intron 13 of 13)	SGSM3-AS1
Peak_26155	chr19	18932437	18932777	-1.43571	0.0407217	Promoter (<=1kb)	HOMER3
Peak_16949	chr9	99118965	99119650	-1.43548	0.00336218	Intron (ENST00000547314.5/7046, intron 1 of 2)	TGFBR1
Peak_18198	chr16	58500746	58501905	-1.4349	0.00238771	Promoter (<=1kb)	NDRG4
Peak_22243	chr12	6924472	6925064	-1.43474	0.0170404	Promoter (<=1kb)	ATN1
Peak_17098	chr11	8267812	8268759	-1.43404	0.022801	Promoter (<=1kb)	LMO1
Peak_13391	chr3	93841509	93841881	-1.43353	0.0229915	Distal Intergenic	PROS1
Peak_26820	chr17	1197600	1198072	-1.43164	0.039766	Intron (ENST00000574139.7/29, intron 1 of 22)	ABR
Peak_17501	chr17	47733630	47734353	-1.43037	0.04637	Promoter (<=1kb)	TBX21
Peak_16400	chr10	97196123	97196806	-1.4303	0.030503	Promoter (<=1kb)	LOC112268065
Peak_30081	chr2	85134509	85135003	-1.43028	0.00869145	Promoter (<=1kb)	TCF7L1
Peak_15356	chr16	84726233	84727217	-1.42973	0.00114029	Intron (ENST00000562743.5/9100, intron 1 of 4)	USP10
Peak_20845	chr10	46556139	46556643	-1.42844	0.0355088	Promoter (<=1kb)	GPRIN2
Peak_11438	chr1	202967409	202968971	-1.42843	0.00243753	Promoter (<=1kb)	CYB5R1
Peak_26707	chr4	140095071	140096054	-1.42774	0.000943256	Intron (ENST00000509479.6/55534, intron 1 of 4)	LOC101927516
Peak_15562	chr2	231411848	231412508	-1.42703	0.0389804	Distal Intergenic	B3GNT7
Peak_7924	chr19	18636980	18637904	-1.42694	0.0492112	Promoter (<=1kb)	KLHL26
Peak_8709	chr8	38029550	38030443	-1.42598	0.0060125	Promoter (<=1kb)	EIF4EBP1
Peak_34310	chr22	44701521	44701902	-1.42523	0.00694291	Promoter (<=1kb)	PRR5
Peak_19509	chr3	48560714	48561200	-1.42412	0.0373891	Promoter (<=1kb)	PFKFB4
Peak_5274	chr4	155666280	155669242	-1.42369	0.000417771	Promoter (<=1kb)	GUCY1A1
Peak_18846	chr2	27264047	27265269	-1.42219	0.0458227	Promoter (<=1kb)	SLC30A3
Peak_19013	chr1	101308978	101310034	-1.42075	0.0145663	Distal Intergenic	LINC01307
Peak_19540	chr8	38081541	38082230	-1.42058	0.000807544	Exon (ENST00000668779.1/ENST00000668779.1, exon 1 of 3)	ASH2L
Peak_21356	chr7	102140995	102141576	-1.41935	0.00144154	Intron (ENST00000437600.9/1523, intron 8 of 22)	CUX1
Peak_26701	chr20	59016973	59017227	-1.41925	0.00824532	Distal Intergenic	TUBB1
Peak_27685	chr14	29928008	29928388	-1.41797	0.00798017	Promoter (<=1kb)	LOC105370429
Peak_5939	chr2	186693566	186695808	-1.41791	0.00030496	Promoter (<=1kb)	FAM171B
Peak_13294	chr11	123654049	123655282	-1.41785	0.00897749	Promoter (<=1kb)	SCN3B
Peak_21368	chr1	82979770	82980074	-1.41713	0.0426115	Promoter (<=1kb)	LINC01361
Peak_24171	chr4	86960759	86961599	-1.41711	0.000303726	Intron (ENST00000504956.5/4299, intron 2 of 2)	AFF1
Peak_34860	chr12	113233110	113233348	-1.41579	0.0168984	Intron (ENST00000552642.5/53373, intron 1 of 3)	TPCN1
Peak_15342	chr19	11673578	11674283	-1.41329	0.0456331	Intron (ENST00000666937.1/ENST00000666937.1, intron 4 of 4)	HNRNPA1P10
Peak_37894	chr13	41004845	41005323	-1.41265	0.0275053	Intron (ENST00000239882.7/1997, intron 1 of 8)	ELF1
Peak_19481	chr1	225999740	226000462	-1.41253	0.0109843	Promoter (<=1kb)	SDE2
Peak_16436	chr17	47253899	47254817	-1.41253	0.0163868	Promoter (<=1kb)	ITGB3
Peak_15852	chr3	123884445	123884964	-1.41126	0.0325971	Promoter (<=1kb)	MYLK
Peak_12965	chr2	130797470	130798620	-1.40743	0.0447282	Distal Intergenic	ARHGEF4
Peak_11844	chr14	53217302	53218420	-1.40726	0.0326587	Promoter (<=1kb)	LOC105370504
Peak_21538	chr14	54776411	54777197	-1.40711	0.0302861	Promoter (<=1kb)	SAMD4A
Peak_24780	chr17	7042374	7042680	-1.40705	0.0134714	Promoter (<=1kb)	SLC16A11
Peak_23399	chr12	51721384	51721727	-1.40634	0.0264621	Exon (ENST00000667214.1/6334, exon 12 of 12)	SCN8A
Peak_16201	chr9	128922188	128922940	-1.4061	0.0081687	Promoter (<=1kb)	PHYHD1
Peak_30551	chr2	135743893	135744309	-1.40538	0.00696685	Promoter (1-2kb)	UBXN4
Peak_18724	chr10	3066605	3067364	-1.40506	0.0313827	Promoter (<=1kb)	PFKP
Peak_28313	chr2	105797111	105797560	-1.40307	0.00285418	Intron (ENST00000233154.9/8440, intron 1 of 4)	NCK2
Peak_16503	chr7	102285759	102286726	-1.40289	0.0233959	Promoter (<=1kb)	SH2B2
Peak_12498	chr17	6831207	6832458	-1.4028	0.0370361	Promoter (<=1kb)	TEKT1
Peak_28213	chr17	69066700	69067074	-1.40255	0.0255765	Distal Intergenic	ABCA9
Peak_22406	chr12	15220912	15221465	-1.40197	0.0199211	Promoter (<=1kb)	RERG
Peak_17540	chr2	222305175	222306505	-1.40064	0.0457846	Exon (ENST00000647762.1/151278, exon 2 of 2)	CCDC140
Peak_21467	chr2	6933975	6934356	-1.40044	0.0356611	Promoter (<=1kb)	RNF144A
Peak_17338	chr1	208086398	208086921	-1.39957	0.02197	Intron (ENST00000367033.4/5362, intron 9 of 31)	LOC105372887
Peak_26171	chr19	45152870	45153683	-1.39833	0.00493989	Exon (ENST00000317951.6/284353, exon 5 of 5)	NKPD1
Peak_28665	chr16	73010306	73010498	-1.39774	0.0151877	Intron (ENST00000268489.10/463, intron 1 of 9)	ZFHX3
Peak_28530	chr5	14676299	14676730	-1.39725	0.00565267	Intron (ENST00000503023.1/90268, intron 1 of 4)	OTULIN
Peak_53352	chr16	85308725	85309041	-1.39724	0.0025725	Exon (ENST00000653746.1/107984830, exon 2 of 2)	MIR5093
Peak_14984	chr16	57536230	57537539	-1.39205	0.00028507	Promoter (<=1kb)	CCDC102A
Peak_39448	chr21	36748071	36748431	-1.39136	0.0405669	3' UTR	SIM2
Peak_20249	chr20	44217528	44218318	-1.38829	0.039766	Exon (ENST00000660003.1/100505783, exon 3 of 4)	OSER1-DT
Peak_8905	chr4	184028191	184029325	-1.38667	0.000591747	Distal Intergenic	STOX2
Peak_22851	chr20	6769206	6770013	-1.38584	0.0212163	Promoter (1-2kb)	BMP2
Peak_20174	chr14	54730046	54730698	-1.38526	0.00207757	Intron (ENST00000554335.6/23034, intron 3 of 12)	SAMD4A
Peak_19549	chr9	122126324	122127095	-1.3845	0.00416079	Distal Intergenic	MIR4478
Peak_5234	chr3	69384134	69386860	-1.38401	0.00176727	Promoter (<=1kb)	FRMD4B
Peak_20475	chr17	21376644	21378290	-1.38352	0.00837241	Promoter (<=1kb)	KCNJ12
Peak_31160	chr17	55271077	55271384	-1.38279	0.0184381	Intron (ENST00000226067.10/3131, intron 2 of 3)	HLF
Peak_15539	chr17	42071929	42073158	-1.38258	0.00178699	Intron (ENST00000436535.4/201181, intron 1 of 8)	ZNF385C
Peak_13074	chr1	220893745	220894563	-1.38192	0.0132933	Distal Intergenic	HLX
Peak_11560	chr21	16193905	16197527	-1.38114	0.00103925	Promoter (<=1kb)	MIR99AHG
Peak_13777	chr18	5628154	5630658	-1.38051	0.0184883	Promoter (<=1kb)	EPB41L3
Peak_1088	chr19	13098296	13103733	-1.3787	3.92665e-07	Promoter (<=1kb)	LYL1
Peak_25869	chr20	51497665	51497940	-1.377	0.0268239	Intron (ENST00000396009.7/4773, intron 3 of 9)	MIR3194
Peak_9494	chr2	66580447	66584435	-1.37665	0.00169203	Intron (ENST00000433396.5/100507073, intron 1 of 5)	LINC01798
Peak_13594	chr3	12796225	12797080	-1.37532	0.0132933	Promoter (<=1kb)	CAND2
Peak_24042	chr10	8404228	8404790	-1.37522	0.0272694	Intron (ENST00000413286.1/105376396, intron 2 of 3)	LOC105376396
Peak_26501	chr3	41419666	41420033	-1.37492	0.0259384	Intron (ENST00000301831.9/54986, intron 34 of 36)	ULK4
Peak_21365	chr3	111913154	111914195	-1.37431	0.00132004	Promoter (1-2kb)	PHLDB2
Peak_18159	chr5	139670167	139671133	-1.37338	1.49214e-06	Intron (ENST00000502295.1/51523, intron 1 of 1)	CXXC5
Peak_23286	chr12	80708485	80709051	-1.37238	0.0460579	Promoter (<=1kb)	MYF6
Peak_22219	chr16	48621396	48622011	-1.37233	0.0228479	Promoter (1-2kb)	N4BP1
Peak_24426	chr12	110354684	110355091	-1.37165	0.0138179	Distal Intergenic	ATP2A2
Peak_23248	chr12	92341155	92341652	-1.37119	0.00935719	Intron (ENST00000615716.2/101930023, intron 2 of 4)	LINC02391
Peak_31448	chr1	231036323	231036497	-1.37109	0.0207531	Intron (ENST00000366654.5/375061, intron 1 of 1)	FAM89A
Peak_4089	chr8	97644178	97646377	-1.36991	0.0098133	Promoter (<=1kb)	MTDH
Peak_24347	chr17	75338392	75339042	-1.36944	0.000702511	Exon (ENST00000413334.1/ENST00000413334.1, exon 1 of 1)	GRB2
Peak_19548	chr3	194205910	194206626	-1.36914	0.00285418	Promoter (<=1kb)	LINC02036
Peak_29398	chr7	37408521	37408778	-1.36719	0.0409301	Intron (ENST00000310758.9/9844, intron 1 of 21)	ELMO1
Peak_25699	chr2	204967424	204967952	-1.36696	0.00869951	Intron (ENST00000406610.7/117583, intron 3 of 22)	PARD3B
Peak_30098	chr20	63844609	63845102	-1.36545	0.0127942	Distal Intergenic	ZBTB46
Peak_16972	chr10	16891472	16891814	-1.36514	0.0473364	Intron (ENST00000377833.10/8029, intron 54 of 66)	CUBN
Peak_23195	chr1	47432601	47432932	-1.3651	0.0228334	Promoter (1-2kb)	FOXD2-AS1
Peak_4297	chr3	152202607	152205891	-1.36442	3.00814e-05	Distal Intergenic	MBNL1
Peak_34491	chr1	246577210	246577552	-1.36336	0.0212869	Intron (ENST00000483271.1/163882, intron 1 of 7)	CNST
Peak_6533	chr2	64766733	64769014	-1.36241	0.0089365	Distal Intergenic	SERTAD2
Peak_15375	chr4	84582205	84582748	-1.36206	0.0417798	Promoter (<=1kb)	CDS1
Peak_16339	chr7	102284734	102285659	-1.35913	0.00239004	Promoter (<=1kb)	SH2B2
Peak_6335	chr20	48825964	48827985	-1.35882	0.000171953	Promoter (<=1kb)	PREX1
Peak_21874	chr17	7043060	7044039	-1.35856	0.0348399	Promoter (<=1kb)	SLC16A11
Peak_31472	chr9	14022352	14022516	-1.35852	0.040977	Distal Intergenic	NFIB
Peak_11078	chr6	90610095	90611766	-1.35731	0.048835	Distal Intergenic	MAP3K7
Peak_24285	chr18	77124422	77124690	-1.3569	0.0397426	Intron (ENST00000355994.7/4155, intron 1 of 8)	MBP
Peak_20253	chr1	220887648	220888135	-1.35688	0.0127165	Distal Intergenic	HLX
Peak_16847	chr7	26101003	26102095	-1.35652	0.0286245	Distal Intergenic	NFE2L3
Peak_19451	chr8	38756430	38757209	-1.3565	0.0135391	Promoter (<=1kb)	TACC1
Peak_12107	chr11	122580647	122581538	-1.35646	0.0242434	Distal Intergenic	MIR100HG
Peak_30840	chr7	137996337	137996794	-1.35472	0.0181532	Intron (ENST00000330387.11/64764, intron 1 of 11)	CREB3L2
Peak_14048	chr8	23102641	23103927	-1.35443	0.0163026	Promoter (<=1kb)	TNFRSF10C
Peak_14624	chr13	43785937	43787867	-1.35442	0.0194688	Promoter (<=1kb)	LOC105370181
Peak_29942	chr17	6713728	6714115	-1.354	0.0307944	Promoter (<=1kb)	SLC13A5
Peak_16420	chr15	60398115	60399227	-1.35313	0.0118584	Promoter (<=1kb)	ANXA2
Peak_15439	chr16	49528093	49529111	-1.35247	0.000935593	Intron (ENST00000561648.5/23090, intron 6 of 8)	ADAM3B
Peak_31335	chr17	2056177	2056958	-1.35241	0.0106418	Promoter (<=1kb)	HIC1
Peak_15014	chr22	42662158	42662859	-1.35237	0.0123043	Distal Intergenic	CYB5R3
Peak_21717	chr18	3790646	3791285	-1.35173	0.0454602	Intron (ENST00000400147.6/9229, intron 2 of 9)	DLGAP1
Peak_978	chr1	44404763	44410487	-1.35162	9.662e-07	Promoter (<=1kb)	RNF220
Peak_3778	chr7	69598416	69601029	-1.35126	0.0212869	Promoter (<=1kb)	AUTS2
Peak_28194	chr12	89345818	89346254	-1.35076	0.019404	Distal Intergenic	DUSP6
Peak_18573	chr10	35607547	35608206	-1.35003	0.00589072	Exon (ENST00000321660.2/219770, exon 2 of 2)	GJD4
Peak_15764	chr1	152109989	152111719	-1.34644	0.00598568	Exon (ENST00000368804.5/7062, exon 2 of 2)	TCHH
Peak_19754	chr14	70018657	70019288	-1.34636	0.00140379	Intron (ENST00000361956.8/64093, intron 10 of 11)	SMOC1
Peak_29797	chr12	3199501	3199776	-1.34577	0.0275846	Promoter (<=1kb)	TSPAN9
Peak_21035	chr1	154760311	154761032	-1.34491	0.0200386	Intron (ENST00000271915.9/3782, intron 3 of 7)	KCNN3
Peak_27914	chr22	49999864	50000133	-1.34459	0.0243343	Exon (ENST00000341280.5/400935, exon 5 of 13)	IL17REL
Peak_3662	chr9	122902988	122905851	-1.34404	0.000442944	Promoter (<=1kb)	RC3H2
Peak_18743	chr12	203348	203810	-1.34342	0.0425584	Promoter (<=1kb)	SLC6A12-AS1
Peak_20876	chr12	122882287	122883518	-1.34339	4.05332e-05	Exon (ENST00000623210.1/ENST00000623210.1, exon 1 of 1)	VPS37B
Peak_20468	chr16	67993389	67994072	-1.34176	0.0228334	Promoter (<=1kb)	DPEP2
Peak_28584	chr7	134669871	134670218	-1.34069	0.0114247	Intron (ENST00000418040.5/669, intron 3 of 3)	BPGM
Peak_2644	chr4	74037678	74039794	-1.33999	0.000171953	Promoter (<=1kb)	CXCL3
Peak_9470	chr12	6828051	6829761	-1.33899	0.0013597	Promoter (<=1kb)	P3H3
Peak_28652	chr7	2738373	2738625	-1.3387	0.0468535	Intron (ENST00000489665.1/155185, intron 4 of 4)	GNA12
Peak_22434	chr21	16241423	16242172	-1.33775	0.0164844	Intron (ENST00000635845.1/388815, intron 4 of 5)	MIR99AHG
Peak_60979	chr6	141254177	141254560	-1.33745	0.0193348	Distal Intergenic	LOC105378029
Peak_17401	chr4	54226989	54228255	-1.33689	0.0356863	Promoter (1-2kb)	PDGFRA
Peak_22478	chr3	134406419	134407103	-1.33662	0.0245364	Distal Intergenic	MIR4788
Peak_17633	chr9	99823749	99825373	-1.33652	0.0139031	Promoter (1-2kb)	NR4A3
Peak_24265	chr9	127783737	127784012	-1.33523	0.00225287	Promoter (1-2kb)	CDK9
Peak_14880	chr8	26448211	26449325	-1.33391	0.0215616	Intron (ENST00000523949.5/665, intron 5 of 5)	LOC105379337
Peak_12271	chr1	32240175	32241363	-1.33338	0.00136674	Promoter (<=1kb)	MTMR9LP
Peak_17785	chr21	29195958	29196449	-1.33284	0.0147577	Promoter (1-2kb)	BACH1
Peak_2266	chr3	169143326	169147918	-1.33199	0.0041922	Promoter (<=1kb)	MECOM
Peak_24801	chr18	8707207	8707520	-1.33198	0.0181532	Promoter (<=1kb)	MTCL1
Peak_11051	chr1	154352225	154353375	-1.32669	0.00992991	Distal Intergenic	ATP8B2
Peak_7463	chr12	109154648	109155575	-1.3263	0.0162979	Promoter (<=1kb)	ACACB
Peak_21160	chr19	35040004	35041210	-1.3258	0.00115568	Promoter (<=1kb)	HPN
Peak_13170	chr2	119544031	119544915	-1.32535	0.0289556	Promoter (<=1kb)	CFAP221
Peak_31455	chr21	42465124	42465411	-1.32283	0.023422	Distal Intergenic	RSPH1-DT
Peak_12373	chr15	40439717	40440571	-1.32152	0.0244796	Promoter (<=1kb)	BAHD1
Peak_53233	chr6	158686359	158686959	-1.32012	0.0468844	Intron (ENST00000360448.8/94120, intron 7 of 18)	SYTL3
Peak_24576	chr17	75997027	75997643	-1.31977	0.00926905	Intron (ENST00000567351.5/100529145, intron 3 of 8)	TEN1-CDK3
Peak_8932	chr1	233294923	233296298	-1.31951	0.0450544	Promoter (<=1kb)	PCNX2
Peak_18564	chr2	74032691	74033181	-1.31922	0.000317538	Intron (ENST00000409262.8/200424, intron 3 of 11)	TET3
Peak_13118	chr10	8054558	8057505	-1.31915	7.6059e-05	Promoter (<=1kb)	GATA3
Peak_23620	chr12	132610207	132610723	-1.31897	0.0319236	Promoter (<=1kb)	LRCOL1
Peak_28361	chr14	105202078	105202275	-1.31867	0.00592178	Distal Intergenic	BRF1
Peak_48474	chr5	54646268	54646941	-1.31856	0.00143676	Distal Intergenic	LOC105378969
Peak_55400	chr8	57993945	57994206	-1.31789	0.0379313	Promoter (<=1kb)	FAM110B
Peak_25787	chr12	94435403	94436034	-1.31785	0.0119597	Intron (ENST00000397809.10/51134, intron 1 of 16)	CEP83
Peak_15416	chr1	182614512	182616172	-1.31722	0.000156968	Promoter (<=1kb)	LINC01686
Peak_14102	chr6	1624369	1625623	-1.31687	0.0128837	Promoter (<=1kb)	GMDS
Peak_18192	chr10	13439616	13440583	-1.31661	0.0315108	Intron (ENST00000486542.5/222389, intron 3 of 3)	BEND7
Peak_28512	chr16	75042701	75043080	-1.316	0.0227364	Intron (ENST00000335325.9/84937, intron 1 of 4)	ZNRF1
Peak_12866	chr7	18289899	18291582	-1.31599	0.0127325	Promoter (<=1kb)	LOC107986698
Peak_11399	chr7	39130398	39131815	-1.31578	0.0127165	Intron (ENST00000518318.7/11281, intron 2 of 9)	POU6F2
Peak_11823	chr1	91884880	91886834	-1.31438	0.0318753	Promoter (<=1kb)	TGFBR3
Peak_17433	chr1	245156703	245157364	-1.31394	0.0455526	Promoter (1-2kb)	KIF26B
Peak_25282	chr12	27555391	27555825	-1.31391	0.00364138	Intron (ENST00000538433.5/8496, intron 1 of 4)	PPFIBP1
Peak_35347	chr11	129950630	129951000	-1.31283	0.0182075	Intron (ENST00000358825.9/56980, intron 4 of 21)	PRDM10
Peak_22498	chr3	24588589	24589761	-1.31241	0.00649819	Exon (ENST00000630391.1/ENST00000630391.1, exon 4 of 5)	THRB-AS1
Peak_22580	chr19	1037904	1038658	-1.31221	8.52001e-05	Promoter (1-2kb)	ABCA7
Peak_20826	chr11	9231204	9231600	-1.31216	0.00333401	Intron (ENST00000328194.8/23258, intron 1 of 22)	DENND5A
Peak_14159	chr4	148216895	148217649	-1.31038	0.0479223	Intron (ENST00000344721.8/4306, intron 3 of 8)	NR3C2
Peak_9253	chr12	30821881	30823567	-1.31011	0.00426092	Intron (ENST00000648700.1/100287314, intron 2 of 2)	LINC00941
Peak_31602	chr5	180085166	180085584	-1.3095	0.0270906	Distal Intergenic	RNF130
Peak_19113	chr6	12483609	12484075	-1.30934	0.00638146	Distal Intergenic	LINC02530
Peak_18097	chr1	246573463	246573812	-1.30792	0.00592178	Intron (ENST00000483271.1/163882, intron 1 of 7)	CNST
Peak_15512	chr12	53324203	53325551	-1.30746	0.0256337	Promoter (<=1kb)	AAAS
Peak_42000	chr10	114498959	114499168	-1.30718	0.0187426	Intron (ENST00000392952.7/3983, intron 1 of 17)	ABLIM1
Peak_25087	chr1	28417033	28417939	-1.30706	0.0236881	Intron (ENST00000633371.1/65979, intron 2 of 4)	PHACTR4
Peak_19177	chr8	26389913	26391119	-1.30706	0.00589072	Promoter (<=1kb)	BNIP3L
Peak_20133	chr9	107490996	107491681	-1.30656	0.0140775	Promoter (<=1kb)	KLF4
Peak_21280	chr8	140955145	140956076	-1.30637	0.00136174	Promoter (<=1kb)	PTK2
Peak_21002	chr14	89303682	89304481	-1.30594	0.00115568	Intron (ENST00000345097.8/1112, intron 3 of 6)	LOC101928817
Peak_30949	chr6	138455728	138456074	-1.30587	0.00275097	Intron (ENST00000427025.6/57224, intron 3 of 6)	MIR3145
Peak_17393	chr1	61254624	61255667	-1.30497	0.0098133	Promoter (1-2kb)	NFIA-AS1
Peak_13648	chr20	51799344	51800677	-1.30308	0.010818	Promoter (<=1kb)	SALL4
Peak_15039	chr7	128135281	128136657	-1.3029	0.0337155	Distal Intergenic	SND1
Peak_16645	chr5	125200384	125201160	-1.30195	0.00721299	Intron (ENST00000647105.1/101927421, intron 2 of 6)	LOC101927421
Peak_23	chr3	185932122	185938109	-1.30132	0.00241115	Promoter (<=1kb)	TRA2B
Peak_23337	chr12	3199929	3201280	-1.30062	0.00233044	Promoter (<=1kb)	TSPAN9
Peak_22103	chr11	62444492	62444897	-1.30048	0.0352655	Intron (ENST00000530124.5/79026, intron 2 of 2)	LOC102723765
Peak_8576	chr12	103928253	103930266	-1.30013	0.0158173	Promoter (<=1kb)	TTC41P
Peak_15717	chr2	161136884	161137360	-1.29967	0.0095472	Promoter (<=1kb)	TANK
Peak_4858	chr16	10876516	10880902	-1.29957	3.70698e-07	Promoter (<=1kb)	CIITA
Peak_6660	chr6	56842619	56843698	-1.29842	0.0106418	Promoter (<=1kb)	DST
Peak_12746	chr17	28371151	28372915	-1.29817	0.0126564	Promoter (<=1kb)	SARM1
Peak_6831	chr9	8856585	8858778	-1.29782	0.0420242	Promoter (<=1kb)	PTPRD-AS1
Peak_13967	chr10	72086888	72088613	-1.29768	0.00254768	Promoter (<=1kb)	SPOCK2
Peak_29509	chr17	77445705	77446361	-1.29661	0.0109843	Promoter (1-2kb)	LOC112268198
Peak_25842	chr10	15313641	15314082	-1.29597	0.010316	Intron (ENST00000378116.9/221061, intron 1 of 7)	FAM171A1
Peak_24325	chr1	6743534	6744117	-1.29438	0.0308376	Distal Intergenic	LINC01672
Peak_15367	chr15	76995113	76996178	-1.29422	0.0019587	Promoter (<=1kb)	PSTPIP1
Peak_33538	chr10	72088695	72089166	-1.29303	0.00228743	Promoter (<=1kb)	SPOCK2
Peak_6765	chr19	14091119	14092496	-1.29222	0.0120974	Promoter (<=1kb)	SAMD1
Peak_5787	chr21	38734023	38735174	-1.29206	0.0237859	Exon (ENST00000663481.1/400866, exon 4 of 4)	LINC00114
Peak_26665	chr9	20398274	20399087	-1.29077	0.0107467	Intron (ENST00000380338.9/4300, intron 5 of 10)	MIR4473
Peak_22260	chr1	67635230	67635812	-1.29033	0.0119449	Distal Intergenic	GADD45A
Peak_26626	chr15	55740280	55740685	-1.29004	0.0274912	Promoter (1-2kb)	PRTG
Peak_25592	chr3	32321262	32321513	-1.29	0.0448802	Intron (ENST00000458535.6/152189, intron 1 of 2)	CMTM7
Peak_19537	chr3	194315135	194315818	-1.28774	0.039189	Intron (ENST00000670716.1/100131551, intron 1 of 3)	LINC00887
Peak_23097	chr9	79812553	79813220	-1.28774	0.0311364	Distal Intergenic	LOC105376101
Peak_16731	chr11	46381871	46382895	-1.28753	0.0134234	Promoter (<=1kb)	MDK
Peak_32755	chr18	80159782	80160363	-1.28735	0.0219961	Exon (ENST00000353265.8/84552, exon 3 of 3)	PARD6G-AS1
Peak_21715	chr14	75542608	75543488	-1.2868	0.00664817	Intron (ENST00000555795.1/10538, intron 2 of 2)	BATF
Peak_12093	chr4	168831473	168833405	-1.28665	0.00708713	Promoter (<=1kb)	PALLD
Peak_30821	chr7	70006013	70006632	-1.28659	0.0187687	Intron (ENST00000644939.1/26053, intron 2 of 18)	AUTS2
Peak_24169	chr17	18901109	18901396	-1.28622	0.0190859	Intron (ENST00000432893.6/5636, intron 7 of 8)	PRPSAP2
Peak_29141	chr14	77372254	77372672	-1.28612	0.00525498	Intron (ENST00000216468.8/283578, intron 1 of 5)	SAMD15
Peak_5702	chr2	105327637	105329526	-1.28589	0.00228742	Promoter (<=1kb)	TGFBRAP1
Peak_15452	chr1	109396962	109397925	-1.28463	0.0316752	Promoter (<=1kb)	SORT1
Peak_258	chr4	145937685	145939423	-1.28431	0.0145695	Promoter (<=1kb)	ZNF827
Peak_22499	chr1	18907688	18908311	-1.28365	0.0216441	3' UTR	IFFO2
Peak_38771	chr10	15169650	15170090	-1.28328	0.00280502	Promoter (<=1kb)	NMT2
Peak_28440	chr18	32040779	32041041	-1.28325	0.0451229	Promoter (<=1kb)	RNF125
Peak_5786	chr5	36605900	36607597	-1.28293	0.00390673	Promoter (<=1kb)	SLC1A3
Peak_33448	chr21	36429514	36429869	-1.2828	0.0171561	Promoter (<=1kb)	LOC105369301
Peak_28509	chr3	4751732	4752034	-1.28245	0.0427531	Promoter (<=1kb)	EGOT
Peak_7246	chr7	29194309	29196948	-1.28181	0.00570823	Promoter (<=1kb)	CHN2
Peak_9878	chr11	30583897	30587134	-1.28179	0.000300168	Promoter (<=1kb)	MPPED2-AS1
Peak_21138	chr17	75844854	75845154	-1.28136	0.0160111	Promoter (<=1kb)	UNC13D
Peak_3610	chr16	70800022	70801545	-1.28058	0.00781201	Promoter (<=1kb)	VAC14
Peak_34292	chr2	207107723	207108161	-1.27987	0.00298272	Promoter (1-2kb)	MIR2355
Peak_29439	chr15	90034659	90034993	-1.2798	0.0086891	Intron (ENST00000268154.9/374655, intron 1 of 4)	MIR3174
Peak_24560	chr11	72584591	72585146	-1.27876	0.0221707	Promoter (<=1kb)	PDE2A-AS2
Peak_6245	chr10	60731653	60734058	-1.27678	0.00104779	Promoter (<=1kb)	LOC107984292
Peak_6459	chr10	75400151	75405264	-1.27586	0.00882993	Promoter (<=1kb)	ZNF503-AS2
Peak_23730	chr19	18700183	18700469	-1.27537	0.00883555	Intron (ENST00000338797.10/23373, intron 1 of 14)	CRTC1
Peak_9948	chr17	16406860	16407604	-1.275	0.0455526	Distal Intergenic	TRPV2
Peak_19741	chr8	115647873	115648750	-1.27456	0.0163868	Intron (ENST00000640765.1/7227, intron 1 of 5)	TRPS1
Peak_36097	chr6	298624	298853	-1.27401	0.00292643	Intron (ENST00000603296.5/56940, intron 1 of 5)	DUSP22
Peak_26125	chr17	81365027	81365538	-1.27387	0.00481715	Intron (ENST00000574472.1/ENST00000574472.1, intron 1 of 2)	LOC100130370
Peak_27152	chr9	79583886	79584273	-1.27315	0.00312175	Intron (ENST00000376544.7/7091, intron 4 of 17)	TLE4
Peak_24189	chr1	12344363	12345574	-1.27269	5.45019e-05	Promoter (<=1kb)	VPS13D
Peak_15429	chr1	39215835	39217207	-1.27182	0.00100038	Promoter (<=1kb)	MACF1
Peak_22361	chr11	78350058	78351242	-1.27112	0.00570611	Intron (ENST00000534168.1/ENST00000534168.1, intron 1 of 1)	GAB2
Peak_35039	chr2	216006294	216006827	-1.27057	0.000779087	Intron (ENST00000263268.11/55686, intron 1 of 4)	MREG
Peak_26774	chr15	41695858	41696211	-1.26929	0.0124757	5' UTR	MIR626
Peak_18206	chr2	209423398	209423834	-1.26921	0.0259482	Promoter (<=1kb)	MAP2
Peak_9008	chr3	20038515	20040297	-1.26907	0.00721299	Promoter (<=1kb)	KAT2B
Peak_3550	chr2	66574987	66579849	-1.26838	0.0148897	Promoter (<=1kb)	LINC01798
Peak_32616	chr15	41503146	41503714	-1.26824	0.00972583	Promoter (1-2kb)	ITPKA
Peak_8676	chr17	75587368	75589202	-1.26749	0.0155597	Promoter (<=1kb)	MYO15B
Peak_40216	chr6	2820022	2820456	-1.26703	0.0147102	Distal Intergenic	SERPINB1
Peak_10766	chr19	3699121	3700493	-1.26437	0.0385913	Promoter (<=1kb)	PIP5K1C
Peak_17325	chr22	19109644	19110389	-1.26368	0.022801	Intron (ENST00000537045.5/9993, intron 1 of 8)	DGCR2
Peak_8194	chr12	7130365	7131674	-1.26331	0.0468535	Promoter (<=1kb)	CLSTN3
Peak_7054	chr14	39432637	39434000	-1.26296	0.0450544	Promoter (<=1kb)	LOC105370461
Peak_13319	chr12	98745402	98746311	-1.26142	0.0038939	Promoter (<=1kb)	ANKS1B
Peak_25737	chr1	59697334	59697744	-1.2608	0.0393086	3' UTR	FGGY
Peak_16785	chr19	35114480	35115210	-1.25988	0.0315716	Promoter (<=1kb)	FXYD3
Peak_30115	chr22	37566280	37566495	-1.2596	0.0211094	Promoter (1-2kb)	CDC42EP1
Peak_23451	chr11	133927726	133928232	-1.25898	0.0422503	Intron (ENST00000533871.8/22997, intron 12 of 19)	IGSF9B
Peak_19105	chr2	239267297	239267559	-1.25883	0.00311697	Intron (ENST00000345617.7/9759, intron 2 of 26)	HDAC4
Peak_23823	chr5	139697608	139697967	-1.25775	0.02488	Intron (ENST00000515296.1/84249, intron 2 of 5)	PSD2
Peak_21631	chr5	170278832	170279447	-1.25741	0.0463848	Intron (ENST00000046794.10/3937, intron 3 of 20)	LCP2
Peak_25776	chr4	123744947	123745404	-1.25719	0.0200386	Exon (ENST00000439565.1/ENST00000439565.1, exon 2 of 3)	LINC01091
Peak_14857	chr19	48696340	48697040	-1.25718	0.0330778	Promoter (<=1kb)	FUT2
Peak_6688	chr6	110039536	110040486	-1.25685	0.0209805	Promoter (<=1kb)	LOC107986631
Peak_38835	chr1	154747835	154748322	-1.25609	0.0171561	Intron (ENST00000271915.9/3782, intron 3 of 7)	KCNN3
Peak_10278	chr2	234494827	234496674	-1.2559	0.00087277	Promoter (<=1kb)	ARL4C
Peak_36067	chr9	133869982	133870223	-1.25563	0.0450544	Intron (ENST00000406606.7/7410, intron 2 of 26)	VAV2
Peak_14652	chr2	120176715	120177941	-1.25541	0.0024064	3' UTR	EPB41L5
Peak_20582	chr5	132746893	132747691	-1.25531	0.0385913	Promoter (<=1kb)	CCNI2
Peak_9148	chr17	17302751	17305340	-1.25505	0.000162299	Promoter (<=1kb)	NT5M
Peak_32078	chr8	93158953	93159243	-1.25161	0.0264654	Intron (ENST00000521906.5/389676, intron 1 of 2)	LINC02906
Peak_21972	chr4	185128288	185129225	-1.2512	0.00358457	Distal Intergenic	SLC25A4
Peak_1346	chr12	11649919	11653980	-1.2509	6.36664e-07	Promoter (<=1kb)	ETV6
Peak_4505	chr19	52785929	52787583	-1.25052	0.0207531	Promoter (<=1kb)	ZNF600
Peak_25199	chr3	149532615	149533039	-1.24921	0.00708713	Intron (ENST00000360632.8/25937, intron 4 of 6)	WWTR1
Peak_18841	chr2	205685607	205686959	-1.24897	0.0470992	Promoter (<=1kb)	NRP2
Peak_20624	chr8	22561954	22562391	-1.24799	0.0445685	Promoter (1-2kb)	SORBS3
Peak_30993	chr1	27403179	27403813	-1.24725	0.000225363	Distal Intergenic	GPR3
Peak_9502	chr4	41359878	41362043	-1.24672	0.00134765	Promoter (<=1kb)	LIMCH1
Peak_26054	chr16	10619444	10620065	-1.2466	0.00780082	Distal Intergenic	EMP2
Peak_21660	chr13	50916934	50917490	-1.24616	0.0267651	Intron (ENST00000422660.6/79621, intron 1 of 9)	RNASEH2B
Peak_16361	chr4	98352452	98353215	-1.24554	0.00168866	Promoter (<=1kb)	RAP1GDS1
Peak_16849	chr7	44104337	44104959	-1.24553	0.0390093	Promoter (<=1kb)	AEBP1
Peak_18662	chr9	35108900	35109971	-1.24542	0.00107284	Promoter (1-2kb)	FAM214B
Peak_278	chr12	54297630	54302728	-1.24507	7.82962e-05	Promoter (<=1kb)	COPZ1
Peak_22852	chr21	17454235	17454659	-1.24322	0.0108218	Distal Intergenic	LINC01549
Peak_13261	chr5	14010894	14012231	-1.24273	0.017924	Promoter (<=1kb)	DNAH5
Peak_6909	chr15	89335061	89336062	-1.24182	0.0409301	Promoter (<=1kb)	POLG
Peak_25156	chr22	25419389	25420240	-1.2405	0.00806348	Distal Intergenic	LRP5L
Peak_7768	chr15	74995068	74996521	-1.23946	0.00126574	Promoter (<=1kb)	SCAMP5
Peak_15907	chr7	93889869	93891119	-1.23914	0.046124	Promoter (<=1kb)	TFPI2-DT
Peak_11456	chr11	44305289	44306398	-1.23895	0.00889697	Intron (ENST00000652299.1/60529, intron 1 of 3)	ALX4
Peak_23515	chr3	28916721	28917221	-1.23807	0.0124089	Intron (ENST00000635992.1/152098, intron 7 of 13)	RBMS3
Peak_38172	chr11	36408983	36409696	-1.23785	0.0434902	Intron (ENST00000529034.5/79899, intron 3 of 3)	PRR5L
Peak_29443	chr16	73166661	73167269	-1.23668	0.00344312	Intron (ENST00000641206.2/463, intron 5 of 17)	ZFHX3
Peak_23158	chr19	18644585	18645177	-1.23657	0.00192464	Promoter (<=1kb)	KLHL26
Peak_14117	chr1	161227557	161228240	-1.23644	0.0254168	Promoter (<=1kb)	TOMM40L
Peak_20763	chr14	95185567	95186218	-1.23477	0.00127239	3' UTR	CLMN
Peak_4991	chr3	171458175	171461927	-1.23388	0.00287121	Promoter (<=1kb)	LOC102724479
Peak_20155	chr11	30560355	30560822	-1.2329	0.0129658	Intron (ENST00000448418.6/744, intron 2 of 6)	MPPED2-AS1
Peak_33955	chr5	137563867	137564717	-1.23275	0.0223226	Intron (ENST00000503916.1/6695, intron 1 of 4)	SPOCK1
Peak_8308	chr14	100221447	100222926	-1.23249	0.000303726	Intron (ENST00000554537.1/ENST00000554537.1, intron 1 of 1)	YY1
Peak_20181	chr14	22556704	22557694	-1.23228	0.0205817	Promoter (<=1kb)	LINC02332
Peak_25255	chr3	152376522	152376826	-1.23132	0.00629299	Intron (ENST00000282486.10/4154, intron 2 of 9)	TMEM14EP
Peak_13564	chr16	29612539	29613751	-1.22986	0.048172	Promoter (<=1kb)	SMG1P2
Peak_23439	chr1	150162539	150163168	-1.22962	0.0211867	Intron (ENST00000502767.1/105371433, intron 1 of 2)	LOC105371433
Peak_14413	chr7	99929079	99929746	-1.22889	0.0216441	Promoter (<=1kb)	GJC3
Peak_27524	chr1	1206162	1206906	-1.22807	0.024186	Promoter (<=1kb)	TNFRSF18
Peak_15516	chr14	102927751	102929253	-1.22731	0.00372248	Promoter (<=1kb)	AMN
Peak_19506	chr3	194324025	194324551	-1.2268	0.0110955	Promoter (1-2kb)	LINC00887
Peak_21492	chr12	27587886	27588601	-1.22621	0.0283398	Intron (ENST00000538433.5/8496, intron 2 of 4)	PPFIBP1
Peak_14290	chr6	149922466	149923646	-1.22598	0.0404526	Promoter (<=1kb)	RAET1G
Peak_9107	chr5	10441095	10442811	-1.2255	0.0192408	Promoter (<=1kb)	ROPN1L-AS1
Peak_25712	chr5	81233085	81233837	-1.22549	0.00881907	Promoter (<=1kb)	CKMT2
Peak_32118	chr2	112832244	112832568	-1.22535	0.0407753	Promoter (1-2kb)	IL1B
Peak_20066	chr1	174938445	174938955	-1.2243	0.0275846	Exon (ENST00000452442.5/101928696, exon 4 of 6)	RABGAP1L-AS1
Peak_24397	chr5	131747412	131747969	-1.22359	0.0252811	Intron (ENST00000514667.1/51735, intron 1 of 28)	FNIP1
Peak_20464	chr16	3938653	3939232	-1.22319	0.0244446	Intron (ENST00000571302.2/ENST00000571302.2, intron 2 of 2)	LINC02861
Peak_16752	chr16	3020388	3021806	-1.22283	0.0193348	Promoter (<=1kb)	TNFRSF12A
Peak_44689	chr8	30389218	30389492	-1.22263	0.0133938	Intron (ENST00000339877.8/11030, intron 1 of 6)	RBPMS
Peak_13631	chr15	88704808	88705892	-1.22094	0.0288528	Distal Intergenic	ISG20
Peak_16577	chr1	16921482	16922276	-1.22043	0.00156223	Promoter (<=1kb)	CROCC
Peak_1376	chr7	106864665	106867171	-1.21986	0.010283	Promoter (<=1kb)	PIK3CG
Peak_22742	chr17	2059442	2059878	-1.21944	0.0147648	3' UTR	HIC1
Peak_13126	chr12	132488607	132489858	-1.21924	0.0497804	Promoter (<=1kb)	FBRSL1
Peak_17127	chr17	30921589	30922123	-1.21826	0.0498378	Promoter (<=1kb)	ADAP2
Peak_1753	chr17	9574880	9577371	-1.2164	0.000610484	Promoter (<=1kb)	CFAP52
Peak_16746	chr14	99946409	99947100	-1.21608	0.0413378	Distal Intergenic	EML1
Peak_28807	chr2	37582804	37583081	-1.21575	0.0290372	Intron (ENST00000659653.1/105374464, intron 2 of 2)	LOC105374464
Peak_15422	chr21	41112759	41113841	-1.21504	0.0146403	Distal Intergenic	LINC00323
Peak_20731	chr7	140359273	140359740	-1.21427	0.0202816	Intron (ENST00000477571.5/84255, intron 5 of 15)	SLC37A3
Peak_5283	chr3	152242930	152247468	-1.21397	5.61136e-05	Promoter (<=1kb)	MBNL1
Peak_31350	chr19	2089863	2090230	-1.21378	0.00416079	Promoter (<=1kb)	MOB3A
Peak_29001	chr4	48490006	48490680	-1.21343	0.0489347	Promoter (<=1kb)	ZAR1
Peak_22592	chr4	94520080	94520630	-1.21331	0.0223226	Intron (ENST00000318007.9/10611, intron 2 of 9)	PDLIM5
Peak_18808	chr17	82697232	82698322	-1.21126	0.0025725	Promoter (<=1kb)	RAB40B
Peak_10562	chr2	177147957	177149126	-1.21105	0.0300738	Promoter (<=1kb)	LOC107985965
Peak_29639	chr14	69625249	69625699	-1.2108	0.0414545	Intron (ENST00000342745.5/9766, intron 1 of 5)	SUSD6
Peak_21080	chr12	49548571	49549505	-1.20994	0.00729237	3' UTR	KCNH3
Peak_11740	chr2	149329405	149331469	-1.20915	0.0131424	Promoter (<=1kb)	LYPD6
Peak_12129	chr4	54539368	54540127	-1.20835	0.0165917	Distal Intergenic	LINC02260
Peak_42139	chr3	7307044	7307531	-1.20776	0.0495373	Intron (ENST00000467425.5/2917, intron 4 of 12)	GRM7
Peak_16377	chr4	16231784	16232629	-1.20762	0.0087592	Intron (ENST00000573308.5/202020, intron 1 of 2)	TAPT1
Peak_26190	chr2	128279866	128280594	-1.20725	0.0022429	Intron (ENST00000469019.1/9394, intron 1 of 2)	HS6ST1
Peak_26507	chr8	22540310	22540926	-1.20674	0.00642406	3' UTR	SORBS3
Peak_21090	chr14	103188720	103189301	-1.20615	0.0245364	Promoter (<=1kb)	LINC00605
Peak_15424	chr1	39214974	39215791	-1.20479	0.000681729	Promoter (<=1kb)	MACF1
Peak_16253	chr5	154405027	154405722	-1.20427	0.0468382	Promoter (1-2kb)	GALNT10
Peak_9949	chr17	17722847	17725047	-1.2034	0.000303726	5' UTR	RAI1
Peak_30876	chr1	172381039	172381335	-1.20283	0.0409301	Intron (ENST00000627582.3/26052, intron 18 of 20)	DNM3
Peak_14873	chr14	64293377	64295040	-1.20269	0.000845619	Promoter (<=1kb)	ESR2
Peak_18962	chr11	134275656	134277102	-1.20268	0.0304596	Promoter (<=1kb)	GLB1L3
Peak_10819	chr17	78130133	78132909	-1.20177	1.24162e-06	Promoter (<=1kb)	TMC6
Peak_23475	chr9	136107166	136107759	-1.20142	0.0098133	Promoter (1-2kb)	LINC02846
Peak_4200	chr7	63924853	63927255	-1.19848	0.00663269	Promoter (<=1kb)	LOC105375318
Peak_30014	chr19	49534166	49534606	-1.19804	0.028734	Exon (ENST00000270645.8/57333, exon 3 of 7)	RCN3
Peak_23991	chr6	22929189	22929485	-1.1978	0.0426496	Intron (ENST00000420572.2/ENST00000420572.2, intron 2 of 2)	LOC102724736
Peak_23410	chr18	13562588	13563076	-1.1978	0.00683275	Exon (ENST00000590042.1/ENST00000590042.1, exon 2 of 3)	LOC102724615
Peak_7319	chr16	75516426	75517713	-1.19665	0.0302861	Distal Intergenic	CHST5
Peak_10072	chr19	11373731	11375038	-1.19616	0.0150969	Promoter (<=1kb)	SWSAP1
Peak_2862	chr5	32708735	32716602	-1.19553	2.3157e-06	Promoter (<=1kb)	NPR3
Peak_10936	chr17	5096419	5098049	-1.19543	0.0169545	Downstream (<=300bp)	ZNF232
Peak_20281	chr11	62555877	62557436	-1.19463	0.00168437	Promoter (<=1kb)	AHNAK
Peak_12580	chr20	4148303	4150495	-1.19326	0.000876015	Promoter (<=1kb)	SMOX
Peak_35311	chr3	72289311	72289718	-1.19268	0.00716886	Distal Intergenic	LINC00877
Peak_16320	chr5	10761468	10762112	-1.19215	0.0124962	Promoter (<=1kb)	DAP
Peak_12074	chr8	61139175	61140043	-1.19203	0.0252996	Intron (ENST00000522621.1/157807, intron 2 of 2)	CLVS1
Peak_12151	chr1	173206788	173207766	-1.19178	0.00422049	Promoter (<=1kb)	TNFSF4
Peak_2192	chr6	135179926	135184882	-1.19174	0.0100996	Promoter (<=1kb)	MYB
Peak_16647	chr8	80687025	80687347	-1.19151	0.0229832	Exon (ENST00000327835.7/619279, exon 4 of 9)	ZNF704
Peak_5860	chr10	22251149	22255000	-1.19133	6.7832e-05	Promoter (<=1kb)	LOC100130992
Peak_30511	chr2	127093773	127093943	-1.19079	0.0133938	Intron (ENST00000376113.6/274, intron 1 of 13)	BIN1
Peak_25980	chr12	121789300	121789931	-1.19058	0.0397163	Intron (ENST00000267205.7/54509, intron 2 of 4)	RHOF
Peak_10631	chr3	143119740	143121390	-1.19008	0.0108218	Promoter (<=1kb)	CHST2
Peak_19890	chr19	3617701	3618094	-1.18942	0.0103898	Promoter (1-2kb)	CACTIN
Peak_25135	chr15	40104909	40105486	-1.1886	0.0314692	Promoter (<=1kb)	BMF
Peak_25245	chr19	48745442	48745742	-1.18805	0.0333474	Promoter (<=1kb)	IZUMO1
Peak_19407	chr3	52532581	52533652	-1.18725	0.0058813	Promoter (<=1kb)	NT5DC2
Peak_17467	chr12	6199723	6200164	-1.18665	0.0162495	Promoter (<=1kb)	CD9
Peak_4121	chr14	67599284	67600724	-1.18556	0.00738099	Promoter (<=1kb)	PIGH
Peak_25140	chr17	45307384	45307838	-1.18485	0.0226864	Intron (ENST00000344686.8/9020, intron 1 of 15)	MAP3K14
Peak_3025	chr14	21382857	21385319	-1.18425	0.0276693	Promoter (<=1kb)	SUPT16H
Peak_34159	chr4	101306405	101306708	-1.18374	0.0228479	Intron (ENST00000512215.5/5530, intron 1 of 7)	MIR1255A
Peak_23273	chr14	75419124	75419527	-1.1837	0.0121338	Distal Intergenic	JDP2-AS1
Peak_25717	chr9	129320422	129321123	-1.18343	0.00635143	Promoter (<=1kb)	LINC02913
Peak_11757	chr17	78923479	78925109	-1.18326	0.0126792	Promoter (<=1kb)	TIMP2
Peak_9526	chr6	89116944	89118477	-1.18284	0.0060125	Promoter (<=1kb)	SRSF12
Peak_10781	chr4	101790383	101791631	-1.18282	0.0487959	Promoter (<=1kb)	BANK1
Peak_27500	chr20	51695721	51696329	-1.18247	0.010369	Exon (ENST00000338821.6/10079, exon 6 of 28)	ATP9A
Peak_9139	chr13	49995508	49996844	-1.18179	0.0055449	Promoter (<=1kb)	MIR3613
Peak_3937	chr7	27161729	27170031	-1.18162	9.662e-07	Promoter (<=1kb)	HOXA10-AS
Peak_47447	chr1	154403583	154403758	-1.18137	0.0437046	Promoter (1-2kb)	IL6R
Peak_34304	chr21	37208003	37208462	-1.18021	0.00723688	Promoter (<=1kb)	DSCR9
Peak_23199	chr11	737385	738024	-1.17994	0.00853015	Distal Intergenic	TALDO1
Peak_9506	chr6	166955411	166957434	-1.17893	0.00794254	Promoter (<=1kb)	RNASET2
Peak_14627	chr4	53592724	53593630	-1.17864	0.000782183	Promoter (<=1kb)	LNX1-AS2
Peak_21457	chr15	84734985	84735717	-1.17582	0.0209805	Intron (ENST00000648837.1/ENST00000648837.1, intron 1 of 1)	ZNF592
Peak_12541	chr11	8909933	8910952	-1.174	0.0199922	Promoter (<=1kb)	DENND2B
Peak_18646	chr13	50208753	50209342	-1.1737	0.02903	Intron (ENST00000486895.5/10301, intron 1 of 1)	DLEU1
Peak_24987	chr8	33574728	33575113	-1.17334	0.0383471	Distal Intergenic	RNF122
Peak_14248	chr17	29593572	29594352	-1.17233	0.0424341	Promoter (<=1kb)	GIT1
Peak_4562	chr17	29137904	29141842	-1.17214	1.03902e-08	Promoter (<=1kb)	MYO18A
Peak_38725	chr2	37892211	37892724	-1.17211	0.0142656	Distal Intergenic	LINC00211
Peak_6948	chr9	133147694	133149344	-1.17157	0.000845619	Promoter (<=1kb)	RALGDS
Peak_6531	chr21	37364752	37366257	-1.17139	0.0187936	Promoter (<=1kb)	DYRK1A
Peak_24015	chr4	140243156	140243768	-1.17133	0.0108561	Distal Intergenic	SCOC
Peak_26758	chr4	53012390	53013118	-1.17121	0.0442435	Intron (ENST00000401642.8/152579, intron 5 of 8)	LOC101928658
Peak_11828	chr10	93061805	93062727	-1.17121	0.0274688	Promoter (<=1kb)	CYP26A1
Peak_12587	chr22	37051687	37052336	-1.17114	0.0384296	Promoter (<=1kb)	KCTD17
Peak_10286	chr22	43013422	43015257	-1.17096	0.0054505	Promoter (<=1kb)	PACSIN2
Peak_19179	chr1	15697077	15697577	-1.17087	0.0211094	Intron (ENST00000375799.8/23207, intron 1 of 19)	PLEKHM2
Peak_28939	chr10	16471116	16471315	-1.17069	0.0257087	Intron (ENST00000423462.6/9317, intron 1 of 3)	PTER
Peak_17047	chr2	74031880	74032551	-1.17014	0.0254052	Intron (ENST00000409262.8/200424, intron 3 of 11)	TET3
Peak_12769	chr2	9205835	9206653	-1.1693	0.00508707	Promoter (<=1kb)	ASAP2
Peak_8520	chr16	3157478	3159494	-1.1691	0.0433049	Exon (ENST00000570843.1/ENST00000570843.1, exon 1 of 1)	CASP16P
Peak_22453	chr4	2811918	2812640	-1.16909	0.0355683	Promoter (<=1kb)	SH3BP2
Peak_19731	chr1	22089557	22090448	-1.16839	0.0102912	3' UTR	CDC42
Peak_14296	chr7	100852234	100853545	-1.16835	0.0123805	Promoter (<=1kb)	SLC12A9-AS1
Peak_31319	chr12	131221865	131222358	-1.16823	0.0414545	Intron (ENST00000536191.2/116437, intron 3 of 3)	LINC01257
Peak_23516	chr4	183455415	183456051	-1.16687	0.0162979	Distal Intergenic	CDKN2AIP
Peak_18333	chr17	68290104	68291313	-1.16645	0.0215763	Promoter (<=1kb)	SLC16A6
Peak_9734	chr11	8593407	8594809	-1.16643	0.0257677	Promoter (<=1kb)	STK33
Peak_563	chr19	37593675	37595755	-1.16589	0.00588877	Promoter (<=1kb)	ZNF540
Peak_14007	chr19	53870398	53871008	-1.16462	0.00100038	Promoter (<=1kb)	MYADM
Peak_25557	chr4	153138771	153139238	-1.16402	0.0486073	Distal Intergenic	TRIM2
Peak_16321	chr18	58438555	58439185	-1.16351	0.0356083	Distal Intergenic	MIR122HG
Peak_24095	chr6	167047669	167048152	-1.16196	0.0402573	3' UTR	CEP43
Peak_24433	chr15	57565274	57565805	-1.16163	0.0171325	Distal Intergenic	MYZAP
Peak_10076	chr11	65832852	65834590	-1.16071	0.0242434	Promoter (<=1kb)	SNX32
Peak_23052	chr7	106071100	106071915	-1.16069	0.0300284	Distal Intergenic	SYPL1
Peak_25285	chr13	39958215	39958684	-1.15977	0.049846	Distal Intergenic	LINC00332
Peak_22244	chr6	36038359	36038828	-1.15932	0.0449409	Intron (ENST00000622903.4/1432, intron 1 of 6)	MAPK14
Peak_23258	chr4	48899379	48899687	-1.15884	0.0125856	Promoter (1-2kb)	OCIAD2
Peak_16585	chr1	203075417	203076456	-1.15881	0.0384296	Promoter (<=1kb)	PPFIA4
Peak_17779	chr7	101740880	101741533	-1.15765	0.0038939	Distal Intergenic	CUX1
Peak_18343	chr19	13104680	13105619	-1.15665	0.0019587	Promoter (1-2kb)	LYL1
Peak_901	chr3	97763903	97765427	-1.15552	0.0486073	Promoter (<=1kb)	ARL6
Peak_29183	chr11	120224657	120224980	-1.15518	0.0308709	Intron (ENST00000328965.9/220323, intron 1 of 3)	POU2F3
Peak_18111	chr10	102673714	102674853	-1.15461	0.000364315	3' UTR	TRIM8
Peak_5996	chr17	48584950	48591196	-1.15444	5.60498e-05	Promoter (<=1kb)	HOXB3
Peak_29766	chr11	63999561	63999851	-1.15385	0.0381223	Promoter (<=1kb)	MACROD1
Peak_17692	chr15	73926401	73928333	-1.15367	0.0164104	Promoter (<=1kb)	LOXL1-AS1
Peak_9740	chr1	201739505	201740956	-1.15297	0.00575803	Promoter (<=1kb)	NAV1
Peak_3168	chr9	20378745	20382957	-1.15215	0.000597556	Promoter (<=1kb)	MLLT3
Peak_18895	chr6	136920744	136922824	-1.15085	0.0122748	Promoter (<=1kb)	SLC35D3
Peak_16037	chr15	74788052	74790827	-1.15021	6.59623e-06	Promoter (<=1kb)	MIR4513
Peak_13091	chr13	99657686	99658890	-1.14961	0.0437875	Intron (ENST00000376355.7/171425, intron 1 of 7)	MIR4306
Peak_17928	chr2	106065061	106066343	-1.14909	0.004645	Promoter (<=1kb)	ECRG4
Peak_6498	chr7	27154111	27161532	-1.14896	2.28628e-05	Promoter (<=1kb)	HOXA7
Peak_3634	chr10	21493816	21497810	-1.1485	0.00135214	Promoter (<=1kb)	MIR1915
Peak_11626	chr1	155062884	155064531	-1.14774	0.00169665	Promoter (<=1kb)	EFNA3
Peak_18749	chr12	64780288	64781326	-1.14715	0.0127165	Promoter (<=1kb)	TBC1D30
Peak_28943	chr11	130160144	130160730	-1.14462	0.0285584	Promoter (<=1kb)	ST14
Peak_26540	chr4	13981332	13982123	-1.14442	0.0392182	Intron (ENST00000669061.1/107986182, intron 4 of 4)	LOC107986182
Peak_35521	chr2	207150286	207150639	-1.14403	0.0163026	Intron (ENST00000309446.11/8609, intron 1 of 3)	KLF7
Peak_25438	chr12	116635168	116635881	-1.14328	0.0373778	Distal Intergenic	MAP1LC3B2
Peak_25535	chr17	2053485	2054610	-1.14177	0.0107467	Promoter (<=1kb)	HIC1
Peak_10249	chr11	9612927	9614972	-1.14174	0.030867	Distal Intergenic	WEE1
Peak_9997	chr8	22578535	22581114	-1.14143	0.000127838	Promoter (<=1kb)	PDLIM2
Peak_35657	chr1	18928275	18928495	-1.14099	0.035101	Intron (ENST00000455833.7/126917, intron 1 of 8)	IFFO2
Peak_1669	chr8	119873638	119876418	-1.14048	0.00126775	Promoter (<=1kb)	DEPTOR
Peak_12454	chr20	9159973	9161837	-1.14016	0.00375228	Intron (ENST00000407043.6/5332, intron 2 of 6)	PLCB4
Peak_1234	chr7	80134825	80137269	-1.1397	0.00176763	Promoter (<=1kb)	GNAI1
Peak_24783	chr17	74213580	74214518	-1.13945	0.0240366	Promoter (<=1kb)	TTYH2
Peak_3544	chr9	76458827	76460588	-1.13864	0.00744883	Promoter (<=1kb)	LOC105376095
Peak_18703	chr1	12594922	12595348	-1.13836	0.0161903	Promoter (<=1kb)	DHRS3
Peak_18336	chr18	13641656	13642246	-1.13807	0.0311184	Promoter (<=1kb)	LDLRAD4
Peak_2450	chr19	58154234	58155615	-1.13762	0.0330508	Promoter (<=1kb)	ZNF329
Peak_5628	chr6	45419179	45422734	-1.1375	0.0280399	Promoter (<=1kb)	RUNX2
Peak_12429	chr9	137044455	137046773	-1.13591	0.0267419	Promoter (<=1kb)	NPDC1
Peak_1783	chr1	32539764	32541059	-1.13571	0.000315634	Promoter (<=1kb)	ZBTB8A
Peak_13928	chr9	125904400	125904999	-1.1355	0.0376473	Intron (ENST00000342287.9/5090, intron 2 of 7)	PBX3
Peak_16494	chr4	3037867	3038715	-1.13451	7.382e-05	Exon (ENST00000398052.9/2868, exon 15 of 16)	HTT
Peak_15403	chr20	11686542	11687625	-1.13246	0.0033999	Promoter (<=1kb)	LOC107985384
Peak_38800	chr9	2032133	2032578	-1.13241	0.0451244	Promoter (<=1kb)	SMARCA2
Peak_29410	chr10	11684614	11685471	-1.13229	0.0157453	Distal Intergenic	ECHDC3
Peak_26616	chr11	69297641	69298744	-1.13223	0.0308522	Intron (ENST00000544008.1/26579, intron 1 of 1)	MYEOV
Peak_5825	chr10	21515977	21520449	-1.13209	0.00889697	5' UTR	SKIDA1
Peak_22426	chr6	87645074	87645690	-1.13205	0.040977	Intron (ENST00000546266.5/23595, intron 12 of 18)	ORC3
Peak_20925	chr5	138610853	138611858	-1.132	0.00411758	Promoter (<=1kb)	CTNNA1
Peak_30842	chr9	107760750	107761207	-1.13172	0.0156377	Distal Intergenic	KLF4
Peak_7331	chr19	29714810	29716258	-1.13156	0.0484501	Promoter (<=1kb)	C19orf12
Peak_11911	chr7	37683339	37685723	-1.13071	0.0183772	Promoter (<=1kb)	GPR141
Peak_8451	chr19	48720523	48721305	-1.12882	0.00708713	Promoter (<=1kb)	MAMSTR
Peak_1985	chr4	142844396	142847860	-1.12795	0.00572666	Promoter (<=1kb)	INPP4B
Peak_23017	chr12	121450858	121451210	-1.12732	0.0300652	Intron (ENST00000377071.9/84678, intron 13 of 22)	MIR7107
Peak_11995	chr11	19711857	19713530	-1.12715	0.0453192	Promoter (<=1kb)	NAV2-AS6
Peak_41041	chr12	108313320	108313768	-1.12527	0.00799069	Intron (ENST00000412676.5/1240, intron 1 of 2)	CMKLR1
Peak_34155	chr1	232725834	232726372	-1.12477	0.0477897	Distal Intergenic	LINC01745
Peak_14588	chr5	150656090	150656690	-1.12474	0.0317519	Exon (ENST00000307662.5/11346, exon 3 of 3)	MYOZ3
Peak_10684	chr6	27138908	27140501	-1.12429	0.0167276	Promoter (<=1kb)	H4C9
Peak_24542	chr7	66281718	66282065	-1.12375	0.0201192	Intron (ENST00000480281.5/8460, intron 1 of 4)	TPST1
Peak_18602	chr5	96816314	96817596	-1.12305	0.00426092	Intron (ENST00000501338.5/51752, intron 3 of 3)	ERAP1
Peak_17513	chr18	48975096	48975822	-1.12165	0.00854569	Distal Intergenic	LOC105372108
Peak_11041	chr19	1855520	1856944	-1.12137	0.00263229	Intron (ENST00000541015.5/83855, intron 1 of 2)	KLF16
Peak_19716	chr7	16563202	16563667	-1.12059	0.0105121	Intron (ENST00000401542.3/100506049, intron 5 of 8)	SOSTDC1
Peak_19526	chr10	4034889	4035750	-1.11979	0.00168247	Intron (ENST00000656775.1/107984195, intron 2 of 2)	LOC107984195
Peak_6370	chr3	136818262	136820705	-1.11911	0.00100112	Promoter (<=1kb)	SLC35G2
Peak_23455	chr13	95247331	95247869	-1.11863	0.0264654	3' UTR	ABCC4
Peak_17519	chr19	13013658	13014928	-1.11849	0.00156223	Promoter (<=1kb)	LOC107985286
Peak_15481	chr11	86799955	86801250	-1.11813	0.0115523	Promoter (<=1kb)	PRSS23
Peak_23505	chr12	62812867	62813517	-1.11766	0.0127942	Intron (ENST00000228705.7/57460, intron 2 of 9)	PPM1H
Peak_5762	chr7	29988325	29989811	-1.1164	0.017996	Promoter (<=1kb)	FKBP14-AS1
Peak_39443	chr7	29337178	29337858	-1.11539	0.0120596	Promoter (1-2kb)	CHN2
Peak_25813	chr3	71702053	71702768	-1.11536	0.0455526	Intron (ENST00000647725.1/27086, intron 3 of 25)	FOXP1
Peak_25322	chr9	20508246	20508688	-1.11526	0.0447334	Intron (ENST00000380338.9/4300, intron 2 of 10)	MIR4474
Peak_22248	chr1	234962559	234963022	-1.11502	0.0485856	Promoter (<=1kb)	LOC101927851
Peak_16281	chr18	13612538	13613267	-1.11399	0.0380892	Promoter (<=1kb)	LDLRAD4
Peak_18689	chr14	64196678	64197461	-1.11379	0.00228743	Promoter (<=1kb)	SYNE2
Peak_16249	chr10	113381938	113382773	-1.11341	0.0456331	Distal Intergenic	LOC107984270
Peak_20969	chr1	181128849	181129335	-1.11282	0.0371203	Distal Intergenic	IER5
Peak_13929	chr4	89055548	89057649	-1.1123	0.0324566	Promoter (<=1kb)	FAM13A
Peak_19280	chr11	93849790	93850285	-1.11228	0.0242434	Promoter (<=1kb)	VSTM5
Peak_11742	chr2	196592418	196593970	-1.11206	0.047628	Promoter (<=1kb)	HECW2
Peak_23040	chr11	128725731	128726435	-1.11197	0.0324923	Intron (ENST00000608303.5/2313, intron 1 of 6)	SENCR
Peak_13105	chr9	35726860	35729017	-1.11185	0.00086736	Intron (ENST00000314888.10/7094, intron 1 of 56)	TLN1
Peak_21128	chr17	44353583	44354009	-1.11064	0.0182336	Promoter (1-2kb)	GRN
Peak_31065	chr16	50747101	50747529	-1.11052	0.0201217	Intron (ENST00000569418.5/1540, intron 2 of 17)	CYLD
Peak_10896	chr2	186848585	186849763	-1.11049	0.0152198	Promoter (<=1kb)	ZSWIM2
Peak_992	chr8	31033785	31034969	-1.10866	0.0283276	Promoter (<=1kb)	WRN
Peak_12555	chr17	43917149	43918174	-1.10679	0.00780082	Promoter (<=1kb)	LOC105371787
Peak_19072	chr9	136700980	136701748	-1.1062	0.00549942	Distal Intergenic	DIPK1B
Peak_20553	chr22	23763152	23763722	-1.10576	0.0102387	Promoter (<=1kb)	C22orf15
Peak_15346	chr7	107660594	107662190	-1.10533	0.0237859	Promoter (<=1kb)	SLC26A4-AS1
Peak_27256	chr10	43595869	43596160	-1.10502	0.0465362	Intron (ENST00000667961.1/ENST00000667961.1, intron 1 of 1)	ZNF485
Peak_25325	chr11	118214075	118214881	-1.10482	0.00299639	Promoter (<=1kb)	JAML
Peak_27176	chr12	122889801	122890084	-1.10471	0.0233839	Promoter (<=1kb)	VPS37B
Peak_18300	chr14	104977597	104978389	-1.10459	0.0214428	Promoter (<=1kb)	AHNAK2
Peak_14933	chr16	30527532	30528247	-1.10333	0.033277	Promoter (<=1kb)	ZNF768
Peak_4113	chr11	47564910	47566889	-1.10232	0.00168437	Promoter (<=1kb)	CELF1
Peak_26357	chr7	101913646	101914304	-1.10206	0.0049207	Promoter (<=1kb)	CUX1
Peak_12159	chr1	32741956	32743048	-1.10205	0.0154332	Promoter (<=1kb)	KIAA1522
Peak_2333	chr7	27147985	27153542	-1.10031	0.000175162	Promoter (<=1kb)	HOXA-AS3
Peak_17878	chr16	57416772	57417527	-1.09908	0.0275846	Distal Intergenic	CCL17
Peak_15981	chr17	63039274	63039727	-1.09814	0.0385913	Intron (ENST00000424789.6/26115, intron 1 of 24)	TANC2
Peak_30830	chr2	190184033	190184703	-1.09698	0.0356519	Intron (ENST00000490033.5/84281, intron 4 of 4)	C2orf88
Peak_6768	chr19	43525229	43527643	-1.09669	0.0316927	Promoter (<=1kb)	ETHE1
Peak_12420	chr7	65251683	65252785	-1.09655	0.0488922	Distal Intergenic	LOC105375334
Peak_13252	chr5	72556134	72557601	-1.09631	0.00716886	Distal Intergenic	LINC02056
Peak_16278	chr4	168877435	168878142	-1.09609	0.00876186	5' UTR	PALLD
Peak_14924	chr9	19934481	19935000	-1.09578	0.0275846	Distal Intergenic	SLC24A2
Peak_22102	chr1	27428533	27429316	-1.09575	0.0122748	5' UTR	GPR3
Peak_13556	chr12	51820116	51821712	-1.0954	0.0038939	3' UTR	TMDD1
Peak_11323	chr5	61625241	61627164	-1.09457	0.000531469	Intron (ENST00000671203.1/ENST00000671203.1, intron 2 of 7)	C5orf64
Peak_10638	chr7	101816575	101818544	-1.09373	0.00273807	Promoter (<=1kb)	CUX1
Peak_131	chr21	15056063	15066784	-1.09358	9.662e-07	Promoter (<=1kb)	NRIP1
Peak_4365	chr16	14070569	14072307	-1.0934	0.00126574	Promoter (<=1kb)	MRTFB
Peak_20656	chr12	94768605	94769324	-1.09334	0.0147841	Distal Intergenic	KRT19P2
Peak_14581	chr18	12679185	12679926	-1.09261	0.0251714	Promoter (<=1kb)	CEP76
Peak_15726	chr10	89206569	89208586	-1.0924	0.000271574	Promoter (<=1kb)	CH25H
Peak_1310	chr2	213148085	213151677	-1.09093	0.0127892	Promoter (<=1kb)	IKZF2
Peak_6456	chr10	102119337	102121982	-1.09063	0.0105668	Promoter (<=1kb)	LDB1
Peak_8125	chr6	130365002	130367557	-1.08963	0.0154181	Promoter (<=1kb)	TMEM200A
Peak_12106	chr1	16215940	16217456	-1.08867	0.000415476	Promoter (<=1kb)	ANO7L1
Peak_5698	chr14	32200367	32204587	-1.0885	0.00481715	Promoter (<=1kb)	RNU6-7
Peak_9199	chr5	88888880	88890882	-1.08797	0.0355447	Promoter (<=1kb)	MEF2C-AS1
Peak_11211	chr14	61750714	61751580	-1.08623	0.0228836	Promoter (<=1kb)	HIF1A-AS3
Peak_17563	chr3	128493291	128494054	-1.08597	0.0228806	Promoter (<=1kb)	GATA2
Peak_6378	chr4	89894367	89899928	-1.08568	0.00651486	Promoter (<=1kb)	MMRN1
Peak_9884	chr2	85576972	85579926	-1.0849	9.19787e-05	Promoter (<=1kb)	VAMP8
Peak_26445	chr10	101063464	101064040	-1.08478	0.0187835	Promoter (<=1kb)	KAZALD1
Peak_4753	chr19	3178179	3181530	-1.08446	3.75523e-05	Promoter (<=1kb)	S1PR4
Peak_19896	chr19	45815014	45815401	-1.08444	0.0174806	Promoter (<=1kb)	RSPH6A
Peak_26211	chr2	63047455	63048078	-1.08422	0.0455526	Promoter (<=1kb)	EHBP1-AS1
Peak_10171	chr6	106509604	106514275	-1.08367	0.00231559	Exon (ENST00000633556.3/202, exon 3 of 22)	CRYBG1
Peak_3119	chr12	62189539	62192902	-1.08356	0.0436126	Promoter (<=1kb)	TAFA2
Peak_20817	chr5	126987670	126988775	-1.08242	0.0302712	Intron (ENST00000308660.6/115123, intron 1 of 4)	MARCHF3
Peak_14787	chr8	27592193	27592790	-1.08238	0.0458619	Distal Intergenic	CLU
Peak_9605	chr12	105330988	105331899	-1.08134	0.010283	Promoter (<=1kb)	C12orf75
Peak_15635	chr11	125062856	125063937	-1.08103	0.016681	Promoter (<=1kb)	SLC37A2
Peak_27064	chr3	194396364	194396890	-1.08009	0.0448485	3' UTR	ATP13A3
Peak_28233	chr3	100073417	100074484	-1.08005	0.00547493	Intron (ENST00000463526.1/84319, intron 2 of 3)	FILIP1L
Peak_6673	chr11	122882936	122883946	-1.0794	0.0439797	Promoter (<=1kb)	JHY
Peak_22158	chr4	159041421	159042440	-1.07886	0.0314098	Distal Intergenic	C4orf45
Peak_17526	chr19	38386875	38388532	-1.07752	0.0467783	Promoter (<=1kb)	GGN
Peak_31059	chr1	181099615	181099924	-1.07746	0.0229393	Distal Intergenic	IER5
Peak_15089	chr16	10553059	10553488	-1.07627	0.00608001	Intron (ENST00000359543.8/2013, intron 1 of 4)	EMP2
Peak_3814	chr4	109559488	109561777	-1.07479	0.00176763	Promoter (<=1kb)	MCUB
Peak_9064	chr10	89301159	89304016	-1.07414	0.00168866	Promoter (<=1kb)	IFIT2
Peak_8179	chr10	22319871	22320823	-1.07407	0.0357906	Promoter (<=1kb)	BMI1
Peak_17165	chr2	11129640	11130656	-1.07388	0.0164104	Promoter (1-2kb)	FLJ33534
Peak_10488	chr8	38465313	38469026	-1.07298	0.00771785	Promoter (<=1kb)	FGFR1
Peak_8662	chr16	21158104	21160141	-1.0725	0.00526388	Promoter (<=1kb)	DNAH3
Peak_21755	chr14	92657308	92657601	-1.07171	0.0301135	Promoter (1-2kb)	RIN3
Peak_13458	chr4	47836131	47838191	-1.07171	0.0255394	Promoter (<=1kb)	CORIN
Peak_20838	chr13	50511845	50512814	-1.07152	0.0118891	Exon (ENST00000484606.1/10301, exon 2 of 2)	DLEU1-AS1
Peak_5666	chr19	30718939	30720420	-1.07027	0.010283	Distal Intergenic	ZNF536
Peak_24556	chr21	37546794	37547417	-1.06815	0.0225362	Distal Intergenic	DYRK1A
Peak_15791	chr13	50129594	50131090	-1.06786	0.00972698	Intron (ENST00000486895.5/10301, intron 1 of 1)	DLEU2
Peak_25291	chr2	197198786	197199542	-1.06669	0.0171325	Promoter (<=1kb)	ANKRD44
Peak_1135	chr5	78293603	78296121	-1.06655	0.0275679	Promoter (<=1kb)	AP3B1
Peak_3037	chr19	12139135	12141308	-1.06526	0.00726425	Promoter (<=1kb)	ZNF20
Peak_30557	chr4	168421641	168421953	-1.06473	0.0416501	Promoter (<=1kb)	DDX60L
Peak_1882	chr11	112024153	112026288	-1.06424	0.00624189	Promoter (<=1kb)	DLAT
Peak_20539	chr2	25250736	25251134	-1.06398	0.0101404	Promoter (<=1kb)	DNMT3A
Peak_5868	chr12	93590894	93592662	-1.06368	0.00285418	Distal Intergenic	SOCS2
Peak_11761	chr4	151407904	151409021	-1.06362	0.0468844	Promoter (<=1kb)	FHIP1A-DT
Peak_5754	chr3	128483371	128493235	-1.06339	4.13177e-06	Promoter (<=1kb)	GATA2-AS1
Peak_29599	chr22	29209206	29209661	-1.06264	0.0326187	Intron (ENST00000334018.11/129080, intron 1 of 14)	EMID1
Peak_4974	chr18	9135410	9137276	-1.06237	0.0380892	Promoter (<=1kb)	NDUFV2-AS1
Peak_11860	chr19	1650341	1652391	-1.06049	0.00159186	Promoter (<=1kb)	TCF3
Peak_235	chr19	11964440	11966019	-1.06026	0.0171526	Promoter (<=1kb)	ZNF763
Peak_8730	chr3	170221802	170223640	-1.06002	0.0408375	Promoter (<=1kb)	PRKCI
Peak_20858	chr2	55051964	55052884	-1.05955	0.0107788	Promoter (1-2kb)	RTN4
Peak_23452	chr11	3947341	3947795	-1.05868	0.0438364	Promoter (<=1kb)	STIM1
Peak_8077	chr4	2535008	2536362	-1.05863	0.0451849	Promoter (<=1kb)	FAM193A
Peak_10518	chr7	44985267	44987306	-1.05825	4.05332e-05	Promoter (<=1kb)	SNHG15
Peak_12130	chr5	141475517	141477270	-1.05721	0.0448802	Promoter (<=1kb)	PCDHGC3
Peak_3160	chr6	7106577	7109986	-1.05616	0.00156223	Promoter (<=1kb)	RREB1
Peak_21999	chr6	33633147	33633656	-1.05599	0.0393517	Intron (ENST00000374316.9/3710, intron 2 of 58)	ITPR3
Peak_10476	chr5	176542340	176544356	-1.05476	0.00942493	Promoter (<=1kb)	CDHR2
Peak_22481	chr7	131011347	131011786	-1.05451	0.0424805	Intron (ENST00000642963.1/378805, intron 2 of 6)	LINC-PINT
Peak_24085	chr6	37177482	37177881	-1.05437	0.0313932	Distal Intergenic	PIM1
Peak_37439	chr9	136532903	136533284	-1.0542	0.0344175	Intron (ENST00000651671.1/4851, intron 2 of 33)	NOTCH1
Peak_12837	chr13	26785185	26786218	-1.05407	0.0374854	Distal Intergenic	GPR12
Peak_21129	chr17	45018788	45019794	-1.05194	0.0420435	Intron (ENST00000678938.1/4836, intron 1 of 11)	DCAKD
Peak_6846	chr1	46202936	46204835	-1.05189	0.000303726	Promoter (<=1kb)	LURAP1
Peak_13283	chr5	95619524	95620792	-1.0511	0.0163026	Promoter (<=1kb)	GPR150
Peak_31910	chr10	13659253	13659750	-1.0505	0.017629	Exon (ENST00000357447.7/55691, exon 21 of 25)	FRMD4A
Peak_14952	chr1	7679826	7681293	-1.04967	0.0178881	Intron (ENST00000303635.12/23261, intron 11 of 22)	CAMTA1
Peak_7169	chr9	121268162	121269818	-1.04943	0.0125263	Promoter (<=1kb)	GSN
Peak_11893	chr8	53656928	53658553	-1.04909	0.0089365	Distal Intergenic	ATP6V1H
Peak_26406	chr9	133702387	133703068	-1.04859	0.0200852	Promoter (<=1kb)	SARDH
Peak_29345	chr8	127759428	127759928	-1.0473	0.0426115	Distal Intergenic	CASC11
Peak_29503	chr9	71742029	71742295	-1.04687	0.0385913	Intron (ENST00000377044.9/23670, intron 4 of 23)	CEMIP2
Peak_10974	chr7	75639314	75640315	-1.04676	0.0149766	Intron (ENST00000336926.11/3092, intron 1 of 30)	HIP1
Peak_3523	chr19	36972571	36974369	-1.04627	0.0231047	Promoter (<=1kb)	ZNF568
Peak_11397	chr17	8137742	8139772	-1.04516	0.00375228	Distal Intergenic	PER1
Peak_17706	chr21	42062869	42064568	-1.04458	0.000432364	Promoter (<=1kb)	UMODL1
Peak_27377	chr1	18927344	18927748	-1.04424	0.0179481	Intron (ENST00000455833.7/126917, intron 1 of 8)	IFFO2
Peak_19353	chr19	13872425	13873268	-1.04281	0.0104851	Promoter (1-2kb)	MIR181C
Peak_28735	chr2	152166885	152167626	-1.04266	0.0166785	Intron (ENST00000263904.5/10254, intron 1 of 13)	STAM2
Peak_7365	chr7	74289467	74291213	-1.04251	0.000596437	Promoter (<=1kb)	CLIP2
Peak_4799	chr7	63899644	63901575	-1.04209	0.0299677	Promoter (<=1kb)	LINC02848
Peak_12835	chr21	45152038	45153212	-1.04057	0.00134805	Intron (ENST00000348831.9/104, intron 2 of 10)	ADARB1
Peak_7539	chr8	103138771	103143206	-1.04031	4.73039e-06	Promoter (<=1kb)	BAALC-AS2
Peak_9276	chr10	125157476	125159292	-1.03982	0.0109778	Promoter (<=1kb)	CTBP2
Peak_25663	chr3	159844198	159844692	-1.03971	0.00554472	Intron (ENST00000476809.7/100505385, intron 4 of 9)	SCHIP1
Peak_5778	chr8	30383434	30388052	-1.03898	0.000539781	Promoter (<=1kb)	RBPMS-AS1
Peak_31377	chr3	69091457	69091911	-1.03867	0.0239997	Intron (ENST00000273258.4/10550, intron 1 of 2)	ARL6IP5
Peak_23642	chr14	105065570	105065966	-1.03766	0.0138277	Promoter (<=1kb)	GPR132
Peak_34287	chr2	159146968	159147699	-1.03699	0.0184406	Promoter (<=1kb)	TANC1
Peak_5379	chr6	44262784	44265628	-1.03677	0.00299441	Promoter (<=1kb)	NFKBIE
Peak_16656	chr13	98411547	98412225	-1.03627	0.00825994	Exon (ENST00000595437.5/10160, exon 16 of 28)	FARP1
Peak_26442	chr1	25861049	25861714	-1.03608	0.0187124	Promoter (1-2kb)	AUNIP
Peak_16659	chr12	124868745	124869834	-1.03576	0.000684133	Intron (ENST00000535005.5/949, intron 1 of 12)	SCARB1
Peak_2298	chr5	59037153	59040881	-1.03529	3.59475e-06	Promoter (<=1kb)	PDE4D
Peak_11979	chr17	29622291	29623420	-1.03529	0.0127942	Promoter (<=1kb)	CORO6
Peak_941	chr10	5094230	5096855	-1.03524	0.00942493	Promoter (<=1kb)	AKR1C3
Peak_20491	chr17	78484855	78485455	-1.03521	0.0228806	Promoter (<=1kb)	DNAH17-AS1
Peak_4414	chr11	72812576	72816113	-1.03488	0.000199354	Promoter (<=1kb)	LOC107984421
Peak_10959	chr3	179652092	179653034	-1.0346	0.0313889	Promoter (<=1kb)	USP13
Peak_1091	chr9	132769117	132771228	-1.03451	0.00973317	Exon (ENST00000451318.2/ENST00000451318.2, exon 1 of 2)	AK8
Peak_8054	chr17	48591241	48594115	-1.03424	0.00293677	Promoter (<=1kb)	HOXB5
Peak_21731	chr3	13894919	13895473	-1.03407	0.0218	Distal Intergenic	WNT7A
Peak_23291	chr8	124605010	124605335	-1.03391	0.0248085	Intron (ENST00000518547.6/9788, intron 3 of 13)	MTSS1
Peak_24310	chr17	2624296	2624899	-1.03365	0.00077335	Intron (ENST00000576586.5/5048, intron 1 of 4)	PAFAH1B1
Peak_13756	chr16	67644837	67645953	-1.03361	0.0122485	Promoter (<=1kb)	CARMIL2
Peak_19375	chr2	241036152	241037035	-1.03319	0.0221717	Promoter (<=1kb)	SNED1
Peak_19441	chr7	32762088	32763288	-1.03296	0.0165184	Promoter (<=1kb)	DPY19L1P1
Peak_19771	chr1	2315345	2315824	-1.03237	0.0247531	Exon (ENST00000659232.1/ENST00000659232.1, exon 1 of 4)	SKI
Peak_15401	chr8	22550861	22552361	-1.03139	0.00284561	Promoter (<=1kb)	SORBS3
Peak_14352	chr5	157670502	157671836	-1.0312	0.0218337	Promoter (<=1kb)	C5orf52
Peak_25991	chr12	50242028	50242270	-1.03111	0.0330573	Intron (ENST00000394943.7/51474, intron 2 of 10)	LIMA1
Peak_398	chr1	74732301	74734632	-1.03066	0.0367216	Promoter (<=1kb)	TYW3
Peak_18446	chr9	19464619	19465323	-1.02989	0.0309677	Distal Intergenic	ACER2
Peak_1145	chr12	54277746	54280590	-1.02917	0.00522453	Promoter (<=1kb)	CBX5
Peak_20973	chr16	79640557	79641175	-1.02812	0.0421562	Distal Intergenic	LOC105371356
Peak_20869	chr3	69092448	69092876	-1.0281	0.0186548	Intron (ENST00000273258.4/10550, intron 1 of 2)	ARL6IP5
Peak_13939	chr1	65265339	65266586	-1.02787	0.0307944	Promoter (<=1kb)	DNAJC6
Peak_20707	chr9	93059279	93060101	-1.02784	0.00837884	Promoter (<=1kb)	SUSD3
Peak_3970	chr17	21126092	21128061	-1.0278	0.0275846	Promoter (<=1kb)	DHRS7B
Peak_26807	chr10	125152170	125152639	-1.02722	0.0055449	Intron (ENST00000337195.9/1488, intron 1 of 10)	CTBP2
Peak_17456	chr11	46332461	46333957	-1.02721	0.00444465	Promoter (<=1kb)	DGKZ
Peak_23784	chr21	45542746	45543539	-1.02558	0.00654458	Promoter (<=1kb)	SLC19A1
Peak_15935	chr7	44977598	44979062	-1.02535	0.0020405	Promoter (<=1kb)	MYO1G
Peak_23533	chr13	41006227	41006798	-1.02421	0.0490974	Intron (ENST00000239882.7/1997, intron 1 of 8)	ELF1
Peak_14252	chr17	64975675	64976634	-1.02398	0.00455297	Promoter (<=1kb)	AMZ2P1
Peak_29529	chr12	46660609	46661049	-1.02359	0.0228479	Intron (ENST00000667191.1/100288798, intron 2 of 2)	SLC38A4
Peak_4341	chr17	43210885	43213549	-1.02316	0.00771026	Promoter (<=1kb)	TMEM106A
Peak_25757	chr8	124351706	124352193	-1.01931	0.0312264	Intron (ENST00000297632.8/157378, intron 1 of 6)	TMEM65
Peak_18006	chr8	46917876	46918534	-1.01924	0.0213809	Distal Intergenic	LOC105375814
Peak_20625	chr8	27633544	27634486	-1.01887	0.0491354	Promoter (<=1kb)	SCARA3
Peak_10139	chr2	218009331	218011567	-1.01711	0.00883939	Promoter (<=1kb)	TNS1
Peak_30951	chr6	15403886	15404487	-1.01704	0.00716886	Intron (ENST00000341776.7/3720, intron 2 of 17)	JARID2
Peak_30636	chr8	42047426	42047696	-1.01656	0.0267419	3' UTR	KAT6A
Peak_14189	chr2	101473705	101475267	-1.01636	0.00197432	Promoter (<=1kb)	RFX8
Peak_3404	chr3	71576615	71584005	-1.01609	6.36664e-07	Promoter (<=1kb)	LOC105377155
Peak_19207	chr11	66081099	66082055	-1.01526	0.0103818	Promoter (1-2kb)	PACS1
Peak_21685	chr7	26155957	26156305	-1.0148	0.0152708	Intron (ENST00000056233.4/9603, intron 1 of 3)	NFE2L3
Peak_24161	chr7	120990694	120991777	-1.01455	0.0484866	Promoter (<=1kb)	CPED1
Peak_10223	chr12	47078725	47081246	-1.01437	0.000491447	Promoter (<=1kb)	AMIGO2
Peak_14508	chr19	3358035	3358697	-1.01397	0.00526742	Promoter (<=1kb)	NFIC
Peak_23192	chr1	3174691	3175685	-1.01331	0.0133938	Intron (ENST00000511072.5/63976, intron 1 of 15)	MIR4251
Peak_13309	chr3	115512450	115514039	-1.01295	0.0280177	Intron (ENST00000662602.1/101926886, intron 7 of 7)	GAP43
Peak_17588	chr6	33592901	33593733	-1.0104	0.028559	Promoter (<=1kb)	LINC00336
Peak_15440	chr5	54883368	54884089	-1.00975	0.0319236	Distal Intergenic	ESM1
Peak_24587	chr19	16584371	16585010	-1.00786	0.0409301	Intron (ENST00000409035.1/9441, intron 2 of 11)	MED26
Peak_8041	chr12	96489193	96490116	-1.00766	0.0473364	Promoter (<=1kb)	CFAP54
Peak_31081	chr2	217905117	217905542	-1.00727	0.0199	Promoter (<=1kb)	TNS1
Peak_20982	chr2	213104058	213104829	-1.00687	0.0171003	Intron (ENST00000451136.6/22807, intron 4 of 7)	IKZF2
Peak_5816	chr6	16238083	16240054	-1.00673	0.0344367	Promoter (<=1kb)	GMPR
Peak_22296	chr10	35378502	35379313	-1.0062	0.016681	Intron (ENST00000490012.6/219771, intron 6 of 9)	CCNY
Peak_28318	chr22	49811397	49811710	-1.00542	0.0402042	Intron (ENST00000438393.5/23774, intron 1 of 11)	BRD1
Peak_2280	chr1	48775475	48778102	-1.00418	0.0120487	Promoter (<=1kb)	BEND5
Peak_974	chr1	178541687	178543699	-1.00394	0.0211094	Promoter (<=1kb)	C1orf220
Peak_19338	chr17	43832374	43833821	-1.00387	0.0465362	Promoter (<=1kb)	MPP3
Peak_10402	chr2	190627630	190628634	-1.00347	0.0379282	Exon (ENST00000638173.1/ENST00000638173.1, exon 3 of 6)	NAB1
Peak_20898	chr1	15156100	15156546	-1.003	0.0263777	Intron (ENST00000428417.5/55092, intron 1 of 2)	TMEM51
Peak_4934	chr11	63767240	63770287	-1.002	0.00342742	Promoter (<=1kb)	ZFTA
Peak_14709	chr16	31476344	31477006	-1.00136	0.0460389	3' UTR	TGFB1I1
Peak_11575	chr9	96777187	96778608	-1.00123	0.0218337	Promoter (<=1kb)	ZNF510
Peak_25442	chr3	177647486	177647844	-1.00122	0.0241157	Intron (ENST00000442937.6/100505566, intron 3 of 3)	LINC00578
Peak_25453	chr7	7989503	7990266	-0.998966	0.0162979	Intron (ENST00000469183.5/729852, intron 4 of 4)	GLCCI1
Peak_2842	chr7	116862532	116864494	-0.998794	0.0194006	Promoter (<=1kb)	CAPZA2
Peak_25491	chr11	9601048	9601737	-0.996138	0.0340425	Distal Intergenic	WEE1
Peak_12824	chr2	219252547	219255096	-0.995929	0.0178915	Promoter (<=1kb)	TUBA4A
Peak_19109	chr15	55267332	55267931	-0.995839	0.0276625	Intron (ENST00000396307.6/5873, intron 1 of 5)	RAB27A
Peak_32114	chr18	13577528	13577888	-0.99562	0.0232576	Intron (ENST00000679177.1/753, intron 3 of 5)	MIR4526
Peak_7123	chr1	183472461	183473901	-0.995563	0.0445288	Promoter (<=1kb)	SMG7
Peak_10090	chr9	121121246	121123025	-0.994795	0.016681	Promoter (<=1kb)	CNTRL
Peak_6105	chr7	37340728	37343431	-0.994115	2.78064e-05	Promoter (<=1kb)	ELMO1
Peak_13943	chr6	151690358	151691832	-0.993333	0.0052574	Promoter (<=1kb)	ESR1
Peak_14747	chr20	45911135	45912564	-0.991035	0.040977	Promoter (<=1kb)	PLTP
Peak_21442	chr13	98542641	98543537	-0.990378	2.22993e-05	Intron (ENST00000539966.6/8428, intron 1 of 10)	STK24
Peak_34639	chr12	54390326	54390641	-0.990222	0.0300738	Promoter (<=1kb)	ZNF385A
Peak_23940	chr1	151838421	151840374	-0.989959	0.0135391	Promoter (<=1kb)	C2CD4D
Peak_6655	chr3	122577334	122578697	-0.989583	0.0270487	Promoter (<=1kb)	PARP15
Peak_6516	chr5	136131987	136134008	-0.988348	0.0443587	Promoter (<=1kb)	SMAD5
Peak_39999	chr2	177352628	177353314	-0.987769	0.0392437	Intron (ENST00000464747.5/4780, intron 1 of 7)	LOC100130691
Peak_7380	chr11	68841956	68844578	-0.986854	5.48985e-05	Promoter (<=1kb)	CPT1A
Peak_24511	chr20	41086616	41087219	-0.986429	0.00651904	Intron (ENST00000361337.3/7150, intron 8 of 20)	TOP1
Peak_7553	chr1	84301142	84304017	-0.986294	0.014611	Promoter (<=1kb)	SAMD13
Peak_17178	chr20	32051592	32053320	-0.984887	0.0158333	Promoter (<=1kb)	HCK
Peak_10679	chr2	165793119	165795119	-0.984385	0.00545334	Promoter (<=1kb)	GALNT3
Peak_14993	chr19	33819723	33821170	-0.982551	0.00481715	Distal Intergenic	KCTD15
Peak_4821	chr9	100209686	100210538	-0.98184	0.0289556	Intron (ENST00000262457.7/27130, intron 3 of 16)	TEX10
Peak_22109	chr11	116851288	116852252	-0.981584	0.0302712	Intron (ENST00000444200.1/104326055, intron 1 of 1)	SIK3
Peak_1569	chr1	108876628	108878518	-0.980919	0.021739	Promoter (<=1kb)	GPSM2
Peak_20947	chr16	57542471	57543190	-0.980735	0.0488922	Promoter (<=1kb)	ADGRG5
Peak_7860	chr3	115657951	115659270	-0.97995	0.0406804	Exon (ENST00000491321.1/ENST00000491321.1, exon 1 of 2)	GAP43
Peak_12303	chr8	93991011	93992197	-0.979665	0.0147102	Distal Intergenic	PDP1
Peak_23464	chr20	841407	842569	-0.979405	0.0058813	Promoter (<=1kb)	FAM110A
Peak_5492	chr17	3913504	3916733	-0.978078	5.24087e-05	Promoter (<=1kb)	P2RX1
Peak_11313	chr20	63520727	63521883	-0.977988	0.021739	Promoter (<=1kb)	PPDPF
Peak_22385	chr6	167699132	167700012	-0.977335	0.0193348	Distal Intergenic	LINC02487
Peak_1563	chr5	76951748	76956528	-0.976954	4.46133e-05	Promoter (<=1kb)	CRHBP
Peak_10102	chr10	89836962	89838531	-0.976466	0.00703426	Exon (ENST00000448963.5/643529, exon 4 of 4)	LINC00865
Peak_4706	chr4	83112343	83115233	-0.976429	0.0314703	Promoter (<=1kb)	PLAC8
Peak_38516	chr13	46124735	46125045	-0.974995	0.0456331	Intron (ENST00000663159.1/100509894, intron 1 of 2)	LCP1
Peak_13948	chr2	55133397	55134053	-0.974853	0.0248124	Distal Intergenic	RTN4
Peak_12682	chr19	58498437	58499267	-0.974781	0.0307944	Promoter (<=1kb)	SLC27A5
Peak_10360	chr11	10304983	10308550	-0.974316	0.0216122	Promoter (<=1kb)	CAND1.11
Peak_13855	chr9	97501678	97503412	-0.972953	0.0285368	Promoter (<=1kb)	TMOD1
Peak_11225	chr1	202158735	202161649	-0.972886	6.56491e-05	Promoter (<=1kb)	PTPN7
Peak_10109	chr14	33948676	33951644	-0.972681	0.000491447	Promoter (<=1kb)	EGLN3
Peak_14081	chr1	65148413	65149840	-0.972162	0.0296317	Promoter (<=1kb)	AK4
Peak_27118	chr2	46350310	46350684	-0.971437	0.0445857	Intron (ENST00000449347.5/2034, intron 3 of 6)	EPAS1
Peak_25074	chr10	34636431	34637062	-0.971221	0.0228479	Intron (ENST00000545260.5/56288, intron 2 of 22)	PARD3
Peak_2376	chr7	5424220	5431006	-0.97082	0.00133317	Promoter (<=1kb)	LOC100129484
Peak_9795	chr19	46717185	46718480	-0.970312	0.0147102	Promoter (<=1kb)	PRKD2
Peak_18160	chr5	143353693	143354492	-0.970163	0.00752961	Intron (ENST00000343796.6/2908, intron 2 of 8)	NR3C1
Peak_11483	chr19	17470468	17471693	-0.968597	0.0385913	Promoter (<=1kb)	SLC27A1
Peak_29109	chr16	12147602	12148251	-0.968445	0.0310196	Intron (ENST00000566228.6/92017, intron 13 of 20)	SNX29
Peak_30427	chr2	96554310	96554900	-0.96818	0.0436228	Distal Intergenic	ARID5A
Peak_5570	chr1	153944675	153946734	-0.967554	0.0424805	Promoter (<=1kb)	DENND4B
Peak_2478	chr20	3406218	3407666	-0.967371	0.0334274	Promoter (<=1kb)	DNAAF9
Peak_1663	chr5	76818255	76821539	-0.967334	0.000614657	Promoter (<=1kb)	F2RL1
Peak_13097	chr13	96993613	96994940	-0.966369	0.0314703	Promoter (<=1kb)	OXGR1
Peak_31720	chr16	85899099	85899810	-0.966081	0.0458227	Promoter (<=1kb)	IRF8
Peak_17561	chr22	50189843	50191583	-0.964715	0.0170493	Promoter (<=1kb)	TRABD
Peak_27835	chr19	51702602	51703437	-0.964322	0.0316927	Promoter (<=1kb)	SPACA6
Peak_13086	chr6	100228519	100229484	-0.964014	0.0127892	Distal Intergenic	SIM1
Peak_809	chr11	59809273	59811442	-0.963295	0.00168452	Promoter (<=1kb)	MRPL16
Peak_21610	chr9	114383294	114384012	-0.961836	0.00188857	Intron (ENST00000374088.8/80709, intron 1 of 21)	AKNA
Peak_28144	chr17	7133527	7133938	-0.961547	0.0119423	Distal Intergenic	ASGR2
Peak_14683	chr1	227541820	227542760	-0.961445	0.0287223	Distal Intergenic	ZNF678
Peak_17312	chr4	102560088	102560609	-0.96108	0.0326587	Intron (ENST00000394820.8/4790, intron 5 of 23)	NFKB1
Peak_15941	chr2	237673271	237674321	-0.961064	0.0228334	Intron (ENST00000308482.14/9208, intron 1 of 23)	LRRFIP1
Peak_40336	chr6	17869466	17869925	-0.960268	0.0108604	Intron (ENST00000378814.9/63971, intron 4 of 37)	KIF13A
Peak_25969	chr11	67271688	67272260	-0.959209	0.00716886	Promoter (<=1kb)	GRK2
Peak_22484	chr20	4811412	4812432	-0.959074	0.0226864	Intron (ENST00000379400.8/9770, intron 2 of 11)	RASSF2
Peak_17381	chr8	38769776	38770757	-0.958815	0.00935719	Intron (ENST00000519416.5/6867, intron 1 of 12)	TACC1
Peak_9062	chr14	37197234	37198737	-0.958442	0.0286938	Promoter (<=1kb)	MIPOL1
Peak_2843	chr11	3807753	3809171	-0.956107	0.047628	Promoter (<=1kb)	PGAP2
Peak_14308	chr9	136372362	136373805	-0.953962	0.0227267	Promoter (<=1kb)	CARD9
Peak_30538	chr3	72177366	72178013	-0.95315	0.0200421	Intron (ENST00000650568.2/201617, intron 1 of 2)	LINC00870
Peak_841	chr17	59565332	59566562	-0.952879	0.00678875	Promoter (<=1kb)	DHX40
Peak_21738	chr17	48546497	48548322	-0.952632	0.0133938	Promoter (<=1kb)	HOXB-AS1
Peak_8628	chr2	64609473	64610201	-0.952458	0.0232348	Intron (ENST00000445738.5/339807, intron 1 of 3)	LINC02579
Peak_23129	chr2	65301167	65301624	-0.952046	0.0146178	Distal Intergenic	SPRED2
Peak_20300	chr9	72527248	72528127	-0.951949	0.00904889	Intron (ENST00000643676.1/117531, intron 1 of 2)	TMC1
Peak_4416	chr19	19642363	19644109	-0.951595	0.0229832	Promoter (<=1kb)	GMIP
Peak_30554	chr22	17087508	17087879	-0.951009	0.024186	Intron (ENST00000477874.1/23765, intron 1 of 3)	IL17RA
Peak_11506	chr6	157273787	157275561	-0.950735	0.00168437	Distal Intergenic	TMEM242
Peak_19527	chr10	75904462	75905249	-0.949533	0.00876186	Intron (ENST00000611255.5/83938, intron 2 of 6)	LRMDA
Peak_14675	chr6	142381482	142384167	-0.949382	0.0498941	Exon (ENST00000230173.10/57211, exon 5 of 26)	ADGRG6
Peak_9327	chr20	64076329	64080008	-0.949317	0.000159037	Promoter (<=1kb)	MIR6813
Peak_4613	chr11	103108866	103110357	-0.94879	0.0119597	Promoter (<=1kb)	DYNC2H1
Peak_35593	chr6	15250290	15250453	-0.945718	0.0270737	Promoter (1-2kb)	JARID2
Peak_26082	chr17	1227950	1228735	-0.945427	0.0164409	Promoter (<=1kb)	ABR
Peak_29356	chr1	19462886	19463339	-0.944773	0.0184435	Intron (ENST00000264202.8/832, intron 1 of 8)	MICOS10
Peak_23226	chr7	66206717	66208095	-0.944517	0.00193573	Promoter (1-2kb)	TPST1
Peak_11476	chr17	29614812	29616968	-0.94417	0.0245648	Promoter (<=1kb)	CORO6
Peak_17277	chr19	46955105	46955770	-0.943752	0.0210356	Intron (ENST00000672722.1/2909, intron 3 of 6)	ARHGAP35
Peak_11266	chr1	46166501	46167445	-0.943347	0.0109769	Intron (ENST00000540385.2/110117499, intron 1 of 9)	TSPAN1
Peak_22282	chr17	17757057	17757594	-0.942977	0.0227553	Intron (ENST00000353383.6/10743, intron 2 of 5)	RAI1-AS1
Peak_36210	chr2	7007617	7008191	-0.942067	0.049472	Intron (ENST00000320892.11/9781, intron 3 of 8)	RNF144A
Peak_11808	chr5	141512405	141514071	-0.941758	0.0182521	3' UTR	PCDHGC4
Peak_7722	chr17	60077925	60079235	-0.941624	0.0282431	Promoter (<=1kb)	HEATR6
Peak_6347	chr6	21664205	21667893	-0.94158	0.00992991	Promoter (<=1kb)	CASC15
Peak_4617	chr11	36375829	36378645	-0.940283	0.0468535	Promoter (<=1kb)	PRR5L
Peak_24404	chr11	118912751	118913059	-0.940197	0.020763	Promoter (1-2kb)	BCL9L
Peak_6289	chr5	173917676	173919028	-0.939019	0.00570611	Promoter (<=1kb)	CPEB4
Peak_26233	chr20	3751839	3752441	-0.938288	0.0275846	3' UTR	C20orf27
Peak_8626	chr4	42657238	42658488	-0.937593	0.049846	Promoter (<=1kb)	ATP8A1
Peak_11407	chr11	2300382	2304271	-0.936084	0.00077335	Promoter (<=1kb)	TSPAN32
Peak_3646	chr19	40613193	40615418	-0.935767	0.00134805	Promoter (<=1kb)	LTBP4
Peak_15167	chr10	114525724	114527452	-0.9354	0.0300738	Promoter (<=1kb)	ABLIM1
Peak_211	chr12	12715433	12720409	-0.933171	0.000584553	Promoter (<=1kb)	CDKN1B
Peak_13240	chr12	121578646	121582300	-0.932647	3.02598e-05	Promoter (<=1kb)	KDM2B-DT
Peak_7484	chr19	58439298	58441038	-0.931928	0.0397606	Promoter (<=1kb)	ZNF132
Peak_6696	chr9	126860027	126862821	-0.931273	0.0061673	Promoter (<=1kb)	ZBTB34
Peak_25584	chr3	71542273	71542878	-0.930526	0.0109778	Promoter (<=1kb)	MIR1284
Peak_30500	chr3	56895121	56895409	-0.930173	0.0455792	Intron (ENST00000338458.8/50650, intron 3 of 12)	ARHGEF3
Peak_39631	chr17	63434363	63435207	-0.929536	0.00333895	Promoter (<=1kb)	CYB561
Peak_24055	chr12	34126079	34126593	-0.928622	0.0216122	Distal Intergenic	ALG10
Peak_11273	chr11	64358669	64360723	-0.928419	0.00115568	Promoter (<=1kb)	RPS6KA4
Peak_23841	chr6	151681645	151682066	-0.928326	0.0354957	Intron (ENST00000473497.5/2099, intron 1 of 2)	ESR1
Peak_25248	chr2	64636619	64637385	-0.928273	0.000274481	5' UTR	LOC105374775
Peak_11716	chr9	128420090	128421935	-0.927945	0.030192	Promoter (<=1kb)	CERCAM
Peak_10178	chr5	139272575	139274756	-0.927925	0.00678875	Promoter (<=1kb)	SNHG4
Peak_25495	chr15	85624343	85625199	-0.927899	0.0384296	Exon (ENST00000560712.1/ENST00000560712.1, exon 2 of 3)	AKAP13
Peak_14040	chr6	5084189	5086012	-0.926203	0.020763	Promoter (<=1kb)	PPP1R3G
Peak_18013	chr9	137423436	137424371	-0.925586	0.0378179	Promoter (<=1kb)	NOXA1
Peak_11047	chr9	130835353	130836449	-0.924932	0.0158216	Promoter (<=1kb)	ABL1
Peak_15079	chr8	33514018	33515126	-0.92492	0.0164822	Promoter (<=1kb)	SNORD13
Peak_14349	chr2	74414774	74416158	-0.924671	0.00169665	Promoter (1-2kb)	C2orf81
Peak_12418	chr6	89433102	89434224	-0.924575	0.0226139	Promoter (<=1kb)	ANKRD6
Peak_16793	chr19	48963296	48965012	-0.924551	0.0308652	Promoter (<=1kb)	FTL
Peak_34515	chr18	3061868	3062119	-0.924052	0.011497	Distal Intergenic	MYOM1
Peak_13897	chr15	52294607	52296233	-0.922287	0.017823	Promoter (<=1kb)	MYO5C
Peak_21049	chr1	247110799	247112327	-0.922252	0.0168709	Promoter (<=1kb)	LINC02897
Peak_12972	chr2	54708586	54709838	-0.921862	0.0162979	Distal Intergenic	EML6
Peak_2480	chr6	2838189	2842598	-0.921557	6.36664e-07	Promoter (<=1kb)	SERPINB1
Peak_17068	chr16	68469776	68471073	-0.921539	0.0326492	Distal Intergenic	SMPD3
Peak_2856	chr17	6650299	6652696	-0.920949	0.00806348	Promoter (<=1kb)	C17orf100
Peak_25503	chr6	17962387	17962707	-0.920693	0.0228464	Intron (ENST00000378814.9/63971, intron 2 of 37)	KIF13A
Peak_19513	chr3	194397030	194398553	-0.92023	0.0178148	5' UTR	ATP13A3
Peak_22428	chr13	44055499	44056212	-0.920166	0.0367921	Distal Intergenic	NRAD1
Peak_13035	chr18	12656600	12658971	-0.920121	0.00854165	Promoter (<=1kb)	SPIRE1
Peak_7386	chr12	62434543	62436172	-0.918546	0.0184372	Distal Intergenic	MON2
Peak_1743	chr9	20619364	20624975	-0.917797	0.00077335	Promoter (<=1kb)	MLLT3
Peak_10647	chr9	137276814	137278427	-0.916898	0.0360542	Promoter (<=1kb)	TOR4A
Peak_4469	chr1	145960031	145962526	-0.916649	0.0220538	Promoter (<=1kb)	ANKRD34A
Peak_9785	chr17	48596110	48598756	-0.916571	0.0128207	Promoter (<=1kb)	HOXB6
Peak_7660	chr7	27170085	27174938	-0.915552	0.00665922	Promoter (<=1kb)	HOXA9
Peak_17104	chr14	103123440	103124625	-0.913047	0.0374055	Promoter (<=1kb)	TNFAIP2
Peak_5782	chr19	35544555	35546564	-0.913003	0.0272056	Promoter (<=1kb)	TMEM147-AS1
Peak_33947	chr3	150605699	150606453	-0.912897	0.0038939	Intron (ENST00000480740.5/51714, intron 1 of 5)	SELENOT
Peak_7636	chr2	202032068	202033622	-0.912395	0.0250501	Promoter (<=1kb)	FZD7
Peak_5943	chr7	134457922	134459667	-0.911987	0.0476917	Promoter (<=1kb)	AKR1B1
Peak_2424	chr13	41016984	41020223	-0.911951	0.0139335	Promoter (<=1kb)	ELF1
Peak_5933	chr4	123396221	123400950	-0.911924	0.0103553	Promoter (<=1kb)	SPRY1
Peak_16964	chr18	13611343	13612478	-0.911822	0.00639235	Promoter (<=1kb)	LDLRAD4
Peak_15082	chr10	101829864	101831558	-0.91073	0.0128454	Promoter (<=1kb)	KCNIP2
Peak_28862	chr18	35050333	35051384	-0.909311	0.00790772	Intron (ENST00000591734.5/10982, intron 2 of 5)	MAPRE2
Peak_7565	chr9	72950389	72953932	-0.909085	0.0378179	Promoter (<=1kb)	ALDH1A1
Peak_1307	chr2	181456380	181461986	-0.907586	0.035723	Promoter (<=1kb)	ITGA4
Peak_7817	chr5	31638197	31640581	-0.907239	0.0140259	Promoter (<=1kb)	PDZD2
Peak_16690	chr7	22853710	22854020	-0.907205	0.0456942	Promoter (<=1kb)	SNHG26
Peak_8119	chr1	55211880	55216619	-0.906929	8.64918e-06	Promoter (<=1kb)	USP24
Peak_3875	chr3	41198343	41199949	-0.906852	0.0455169	Promoter (<=1kb)	CTNNB1
Peak_4793	chr1	153920212	153922526	-0.906404	0.0171515	Promoter (<=1kb)	GATAD2B
Peak_22257	chr5	95620942	95621851	-0.905096	0.0456942	Promoter (<=1kb)	GPR150
Peak_13355	chr16	77211842	77213355	-0.903898	0.00440978	Promoter (<=1kb)	SYCE1L
Peak_24302	chr19	1363393	1364073	-0.903514	0.0204307	Promoter (1-2kb)	PWWP3A
Peak_21000	chr13	97227076	97227883	-0.900049	0.0455526	Intron (ENST00000397601.5/10150, intron 1 of 6)	MBNL2
Peak_20135	chr7	28955545	28957366	-0.899307	0.0110515	Promoter (<=1kb)	TRIL
Peak_13494	chr9	129436690	129438921	-0.899065	0.0120295	Promoter (<=1kb)	LOC105376291
Peak_16032	chr3	4504062	4505296	-0.898979	0.000790418	Intron (ENST00000649669.1/3708, intron 2 of 3)	ITPR1
Peak_16587	chr19	3604712	3606624	-0.897857	0.0329996	Promoter (<=1kb)	TBXA2R
Peak_35551	chr22	23186086	23186304	-0.897468	0.0141754	Intron (ENST00000479188.5/613, intron 1 of 4)	BCR
Peak_4557	chr6	73695108	73698156	-0.897277	0.00193573	Promoter (<=1kb)	CD109-AS1
Peak_15744	chr14	89164802	89166468	-0.897187	0.000498774	Intron (ENST00000557572.1/1112, intron 1 of 2)	FOXN3
Peak_16586	chr1	42319404	42320410	-0.897011	0.0491445	Intron (ENST00000372572.5/22887, intron 2 of 14)	FOXJ3
Peak_15509	chr12	26121746	26123786	-0.897	0.0343682	Promoter (<=1kb)	LOC105369705
Peak_13450	chr20	51542793	51543528	-0.896581	0.0455526	Promoter (<=1kb)	NFATC2
Peak_4038	chr6	45422789	45425675	-0.896493	0.0208284	Promoter (<=1kb)	RUNX2
Peak_21593	chr10	69089726	69091498	-0.895832	0.00337502	Promoter (1-2kb)	SRGN
Peak_13705	chr12	42468287	42469822	-0.895816	0.040977	Promoter (<=1kb)	PRICKLE1
Peak_15732	chr3	170418242	170419466	-0.895577	0.0262734	Promoter (<=1kb)	CLDN11
Peak_5540	chr1	203626120	203630345	-0.895062	0.0124089	Promoter (<=1kb)	ATP2B4
Peak_35499	chr17	63697461	63697717	-0.892463	0.0302712	Promoter (1-2kb)	LIMD2
Peak_31238	chr5	134545179	134545564	-0.892124	0.0462458	Promoter (<=1kb)	JADE2
Peak_15828	chr19	2561936	2562489	-0.890462	0.0233959	Intron (ENST00000382159.8/2788, intron 2 of 4)	MIR7850
Peak_21772	chr1	2290960	2291565	-0.890065	0.0197501	Intron (ENST00000378536.5/6497, intron 1 of 6)	SKI
Peak_21665	chr3	197878270	197878891	-0.889668	0.0483235	Intron (ENST00000438796.6/84859, intron 20 of 21)	LRCH3
Peak_30734	chr20	37194941	37195497	-0.889363	0.0392182	Intron (ENST00000456102.5/6185, intron 2 of 5)	MROH8
Peak_5609	chr18	58042836	58046380	-0.887911	0.0227536	Promoter (<=1kb)	NEDD4L
Peak_11087	chr3	119809583	119810681	-0.887463	0.0329342	Promoter (<=1kb)	NR1I2
Peak_17304	chr21	36430134	36431163	-0.887198	0.0228021	Promoter (<=1kb)	LOC105369301
Peak_9310	chr17	75843135	75844717	-0.886825	0.00658475	Promoter (<=1kb)	UNC13D
Peak_9857	chr1	218344850	218347896	-0.886551	0.0455169	Promoter (<=1kb)	TGFB2
Peak_10106	chr12	132600374	132601327	-0.886502	0.019797	Distal Intergenic	LRCOL1
Peak_8975	chr15	74541195	74542494	-0.885895	0.0436228	Promoter (<=1kb)	ARID3B
Peak_10645	chr8	38899799	38901072	-0.885569	0.0273888	Promoter (<=1kb)	PLEKHA2
Peak_19718	chr9	122218463	122220470	-0.88507	0.00358624	Promoter (1-2kb)	LHX6
Peak_463	chr17	76734163	76737401	-0.883375	0.00487569	Promoter (<=1kb)	SRSF2
Peak_23632	chr12	6773213	6774160	-0.882791	0.0268239	Promoter (<=1kb)	LAG3
Peak_6383	chr12	9647499	9650978	-0.88238	0.008562	Promoter (<=1kb)	LOC105369728
Peak_9456	chr10	103450834	103452966	-0.881169	0.0146178	Promoter (<=1kb)	CALHM2
Peak_17155	chr19	3950863	3951981	-0.880287	0.00707671	Distal Intergenic	DAPK3
Peak_17841	chr10	86536192	86536960	-0.878432	0.0425928	Distal Intergenic	WAPL
Peak_18284	chr12	108768460	108769337	-0.876423	0.0270906	Distal Intergenic	CORO1C
Peak_14197	chr8	55843733	55845191	-0.874134	0.00991241	Distal Intergenic	LYN
Peak_15968	chr6	90284092	90286070	-0.873934	0.0111495	Intron (ENST00000257749.9/60468, intron 1 of 8)	LOC105377891
Peak_18874	chr3	197028625	197030208	-0.87362	0.016655	Promoter (<=1kb)	MELTF
Peak_15406	chr20	51540228	51541277	-0.873242	0.00426092	Promoter (1-2kb)	NFATC2
Peak_3639	chr13	44575266	44578884	-0.87314	0.0023089	Promoter (<=1kb)	TSC22D1-AS1
Peak_19600	chr10	45592332	45592890	-0.872583	0.0298735	Promoter (1-2kb)	MARCHF8
Peak_7202	chr17	80100804	80102617	-0.87205	0.00449833	Promoter (<=1kb)	GAA
Peak_2828	chr12	25051558	25055543	-0.871483	0.00191568	Promoter (<=1kb)	IRAG2
Peak_24500	chr16	75064673	75065790	-0.870941	0.00585439	Intron (ENST00000335325.9/84937, intron 1 of 4)	ZNRF1
Peak_26583	chr17	80765036	80765886	-0.870606	0.00440978	Intron (ENST00000574767.5/57521, intron 5 of 11)	RPTOR
Peak_1517	chr9	131272987	131278964	-0.868538	1.50589e-05	Promoter (<=1kb)	FAM78A
Peak_22085	chr3	23671763	23672274	-0.868522	0.0494361	Distal Intergenic	UBE2E1
Peak_13558	chr12	57755473	57756913	-0.868074	0.0215925	Promoter (<=1kb)	CDK4
Peak_3919	chr6	27808448	27811756	-0.866943	0.024186	Promoter (<=1kb)	H3C10
Peak_18626	chr7	139103347	139104547	-0.864336	0.00669438	Intron (ENST00000242351.10/56829, intron 1 of 12)	ZC3HAV1
Peak_19515	chr6	135880145	135881009	-0.864228	0.0232576	Promoter (<=1kb)	LOC101928373
Peak_14414	chr18	58194917	58195910	-0.863744	0.0349813	Promoter (<=1kb)	LOC105372143
Peak_18384	chr22	50314215	50315067	-0.863606	0.00869145	Exon (ENST00000453835.1/ENST00000453835.1, exon 1 of 2)	DENND6B
Peak_7774	chr17	3961296	3965599	-0.863254	0.00200764	Promoter (<=1kb)	ATP2A3
Peak_5337	chr5	102754064	102756586	-0.863069	0.0436714	Promoter (<=1kb)	PAM
Peak_1442	chr7	92829352	92836380	-0.86286	4.05332e-05	Promoter (<=1kb)	CDK6
Peak_2071	chr2	138501859	138504822	-0.861456	0.014895	Promoter (<=1kb)	SPOPL
Peak_8064	chr2	156435195	156437600	-0.860919	0.0150305	Promoter (<=1kb)	GPD2
Peak_18280	chr11	65577267	65578100	-0.860897	0.0193348	Promoter (<=1kb)	EHBP1L1
Peak_48	chr12	111840217	111843456	-0.860757	0.0108218	Promoter (<=1kb)	MAPKAPK5-AS1
Peak_31292	chr1	226350256	226350808	-0.860499	0.0380943	Distal Intergenic	PARP1
Peak_4147	chr7	158827170	158830594	-0.86048	0.0089365	Promoter (<=1kb)	ESYT2
Peak_12352	chr1	36320333	36322239	-0.860305	0.000574237	Promoter (<=1kb)	SH3D21
Peak_9308	chr17	63997830	63999268	-0.860256	0.0375543	Promoter (<=1kb)	PRR29-AS1
Peak_13729	chr1	32702201	32703610	-0.85976	0.0162979	Promoter (<=1kb)	SYNC
Peak_8745	chr12	48813913	48816130	-0.857331	0.0495524	Promoter (<=1kb)	CACNB3
Peak_18168	chr11	47393303	47395925	-0.857181	0.00229018	Promoter (<=1kb)	SPI1
Peak_17881	chr16	88633936	88635252	-0.856372	0.00324938	Distal Intergenic	IL17C
Peak_23077	chr22	19844499	19845067	-0.856027	0.0476469	Intron (ENST00000329517.11/54584, intron 2 of 7)	GNB1L
Peak_15086	chr1	21334445	21335489	-0.854158	0.0434923	Intron (ENST00000415912.6/1889, intron 1 of 18)	ECE1
Peak_19228	chr10	35379540	35380123	-0.852299	0.00716886	Intron (ENST00000490012.6/219771, intron 6 of 9)	CCNY
Peak_28469	chr6	108798253	108798770	-0.850255	0.0441751	Distal Intergenic	LINC00222
Peak_19366	chr19	908690	909370	-0.850025	0.0358141	Intron (ENST00000361574.10/91300, intron 1 of 7)	R3HDM4
Peak_6835	chr5	160467892	160472104	-0.848776	0.000162985	Promoter (<=1kb)	MIR3142HG
Peak_25660	chr21	43834793	43835901	-0.848343	0.0329776	Distal Intergenic	AATBC
Peak_7237	chr13	51453309	51454867	-0.848009	0.0327922	Promoter (<=1kb)	INTS6-AS1
Peak_24197	chr5	80754851	80755872	-0.846803	0.0376473	Intron (ENST00000670357.1/4437, intron 12 of 24)	MSH3
Peak_8118	chr1	161037890	161039276	-0.846455	0.018658	Promoter (<=1kb)	TSTD1
Peak_9892	chr20	25056422	25059493	-0.845472	0.00651904	Promoter (<=1kb)	ACSS1
Peak_10230	chr20	16572767	16573995	-0.844461	0.0183772	Promoter (<=1kb)	KIF16B
Peak_4077	chr15	56364732	56366506	-0.843094	0.00992991	Promoter (<=1kb)	TEX9
Peak_27019	chr10	101061767	101062224	-0.842876	0.0231442	Promoter (<=1kb)	KAZALD1
Peak_10811	chr3	184710791	184712848	-0.841475	0.0101998	Promoter (<=1kb)	LOC107986163
Peak_5079	chr9	123032687	123038713	-0.840714	0.0103125	Promoter (<=1kb)	RABGAP1
Peak_1447	chr6	28398938	28400556	-0.840398	0.0320677	Promoter (<=1kb)	ZSCAN12
Peak_22492	chr1	41738700	41739143	-0.838899	0.0467701	Intron (ENST00000372584.5/59269, intron 1 of 7)	HIVEP3
Peak_1431	chr19	41350548	41353957	-0.838896	0.042463	Promoter (<=1kb)	BCKDHA
Peak_6699	chr11	5689150	5692776	-0.837925	0.000298672	Promoter (<=1kb)	TRIM22
Peak_3760	chr19	37653785	37656783	-0.837111	0.0408375	Promoter (<=1kb)	ZFP30
Peak_11231	chr12	124921338	124922534	-0.836569	0.00602648	Distal Intergenic	UBC
Peak_6985	chr10	102112495	102114651	-0.835032	0.0110515	Promoter (<=1kb)	LDB1
Peak_1604	chr18	75161275	75162075	-0.834514	0.0401251	Distal Intergenic	ZADH2
Peak_9900	chr3	63967193	63970469	-0.833178	0.00696685	Promoter (<=1kb)	ATXN7
Peak_31833	chr6	15398492	15399140	-0.830816	0.0368322	Intron (ENST00000341776.7/3720, intron 2 of 17)	JARID2
Peak_11639	chr10	24951837	24953406	-0.830742	0.0139031	Promoter (<=1kb)	LINC01516
Peak_27493	chr8	55885346	55886106	-0.830104	0.0276904	Intron (ENST00000520220.6/4067, intron 1 of 12)	LYN
Peak_17289	chr15	95879222	95880015	-0.829769	0.0433074	Distal Intergenic	LOC112268156
Peak_8722	chr9	97237845	97239429	-0.826028	0.0315642	Promoter (<=1kb)	SUGT1P4-STRA6LP
Peak_34659	chr15	70094082	70094430	-0.825708	0.0373946	Promoter (<=1kb)	TLE3
Peak_18805	chr17	79781219	79782205	-0.825407	0.0193103	3' UTR	CBX2
Peak_15447	chr21	15050371	15052938	-0.824454	0.00333895	Exon (ENST00000623352.1/ENST00000623352.1, exon 1 of 1)	NRIP1
Peak_5554	chr9	106859901	106865005	-0.824271	0.032811	Promoter (<=1kb)	ZNF462
Peak_3058	chr9	130040714	130043189	-0.823797	0.0455526	Promoter (<=1kb)	FNBP1
Peak_27143	chr9	137629953	137630869	-0.823678	0.0354022	Intron (ENST00000637510.1/92714, intron 1 of 1)	EHMT1
Peak_8632	chr8	119638400	119640040	-0.823267	0.0225668	Promoter (<=1kb)	ENPP2
Peak_1515	chr3	41960786	41962863	-0.823187	0.0386509	Promoter (<=1kb)	ULK4
Peak_4360	chr11	57637541	57640169	-0.822377	0.00200061	Promoter (1-2kb)	MIR130A
Peak_1598	chr10	19814319	19819324	-0.821488	0.0022029	Promoter (<=1kb)	PLXDC2
Peak_25819	chr2	10382180	10383214	-0.820123	0.0034873	Intron (ENST00000423674.5/3241, intron 1 of 3)	HPCAL1
Peak_26120	chr17	77460558	77460993	-0.819523	0.0455169	Intron (ENST00000591198.5/10801, intron 2 of 10)	SEPTIN9
Peak_14120	chr9	78022590	78023620	-0.81892	0.0344194	Intron (ENST00000286548.9/2776, intron 1 of 6)	GNAQ
Peak_25382	chr6	16704217	16704802	-0.818683	0.0139303	Intron (ENST00000244769.8/6310, intron 3 of 8)	ATXN1
Peak_6647	chr9	136327993	136329708	-0.818335	0.0133938	Promoter (<=1kb)	GPSM1
Peak_1936	chr4	16081563	16084881	-0.818115	0.0133938	Promoter (<=1kb)	PROM1
Peak_34146	chr7	131104642	131104950	-0.817934	0.0115268	Promoter (1-2kb)	LINC-PINT
Peak_60032	chr2	46015809	46016196	-0.816796	0.0364202	Intron (ENST00000306156.8/5581, intron 10 of 14)	PRKCE
Peak_20419	chr11	413200	413745	-0.816387	0.0415902	Promoter (1-2kb)	SIGIRR
Peak_12895	chr12	3751997	3753859	-0.81496	0.00696459	Promoter (<=1kb)	LOC107984495
Peak_14163	chr22	31637446	31638947	-0.814749	0.00168437	Promoter (<=1kb)	PISD
Peak_11256	chr11	18705578	18707201	-0.814486	0.0225809	Promoter (<=1kb)	LOC105376579
Peak_30906	chr17	17751225	17752132	-0.813076	0.0114303	Intron (ENST00000353383.6/10743, intron 2 of 5)	RAI1-AS1
Peak_26184	chr2	10057274	10057733	-0.81159	0.0491311	3' UTR	KLF11
Peak_21383	chr9	3508461	3509164	-0.811231	0.0115567	Intron (ENST00000382004.7/5991, intron 1 of 17)	RFX3
Peak_13032	chr15	45185983	45187698	-0.811157	0.0084491	Promoter (<=1kb)	SHF
Peak_33416	chr1	89540371	89540760	-0.810717	0.0401102	Intron (ENST00000439853.6/23507, intron 1 of 6)	LOC105378844
Peak_9908	chr7	64306436	64308251	-0.809594	0.0110515	Exon (ENST00000493036.5/ENST00000493036.5, exon 1 of 4)	ZNF736
Peak_5744	chr2	203327551	203329660	-0.80949	0.0408375	Promoter (<=1kb)	ABI2
Peak_11364	chr7	129169134	129170363	-0.809004	0.00906431	3' UTR	TSPAN33
Peak_712	chr6	70412445	70414912	-0.807577	0.0183772	Promoter (<=1kb)	FAM135A-AS1
Peak_12997	chr7	149714926	149715782	-0.807347	0.0273888	Promoter (<=1kb)	KRBA1
Peak_3035	chr18	31497372	31499528	-0.807212	0.0162984	Promoter (<=1kb)	DSG2
Peak_3511	chr12	56448614	56449969	-0.80484	0.0408375	Promoter (<=1kb)	TIMELESS
Peak_717	chr9	2014064	2019719	-0.804608	0.024186	Promoter (<=1kb)	SMARCA2
Peak_5684	chr8	124369264	124373533	-0.802456	0.00287121	Promoter (<=1kb)	TMEM65
Peak_16572	chr18	62324226	62325180	-0.802307	0.0452153	Promoter (<=1kb)	TNFRSF11A
Peak_5496	chr14	59188544	59190655	-0.801921	0.0300738	Promoter (<=1kb)	DAAM1
Peak_11898	chr9	137028428	137030586	-0.801634	0.0325076	Promoter (<=1kb)	ABCA2
Peak_17103	chr13	48319602	48320552	-0.801428	0.0246478	Exon (ENST00000474415.1/ENST00000474415.1, exon 1 of 1)	RB1
Peak_1589	chr2	66431897	66442249	-0.801134	0.0170948	Promoter (<=1kb)	MEIS1-AS2
Peak_17278	chr20	36472506	36473261	-0.800968	0.0468844	Promoter (<=1kb)	DLGAP4
Peak_8698	chr6	116369872	116372067	-0.80068	0.0455526	Promoter (<=1kb)	DSE
Peak_27050	chr2	239230423	239230900	-0.800619	0.0228389	Intron (ENST00000345617.7/9759, intron 3 of 26)	HDAC4
Peak_3652	chr22	39143939	39145683	-0.800035	0.0140047	Intron (ENST00000475962.5/23492, intron 1 of 1)	CBX7
Peak_13241	chr17	78774401	78775849	-0.799958	0.0030966	Intron (ENST00000591455.5/9267, intron 1 of 12)	CYTH1
Peak_4196	chr2	135984114	135986293	-0.798133	0.0280745	Promoter (<=1kb)	DARS1-AS1
Peak_1488	chr8	107494231	107499246	-0.797121	0.0420435	Promoter (<=1kb)	ANGPT1
Peak_5513	chr12	9865001	9870715	-0.796388	0.0121338	Promoter (<=1kb)	CLEC2B
Peak_23281	chr8	140598121	140599144	-0.795791	0.016303	Intron (ENST00000220592.10/27161, intron 1 of 18)	AGO2
Peak_2140	chr4	141635772	141637661	-0.795308	0.0127942	Promoter (<=1kb)	IL15
Peak_452	chr6	109091859	109096687	-0.79508	0.0184372	Promoter (<=1kb)	SESN1
Peak_13523	chr10	48492304	48493724	-0.792345	0.0487518	Promoter (<=1kb)	ARHGAP22
Peak_11638	chr10	13529091	13530164	-0.789858	0.0368097	Promoter (<=1kb)	BEND7
Peak_21617	chr16	2487680	2488490	-0.789738	0.0121201	Intron (ENST00000567020.6/57465, intron 1 of 6)	TBC1D24
Peak_3641	chr15	75200837	75204639	-0.78891	0.00345791	Promoter (<=1kb)	C15orf39
Peak_20303	chr14	100065131	100066651	-0.787855	0.00861446	Promoter (<=1kb)	EVL
Peak_7190	chr14	88791658	88793588	-0.787064	0.0240899	Promoter (<=1kb)	EML5
Peak_11847	chr15	55740756	55743529	-0.786342	0.0260013	Promoter (<=1kb)	PRTG
Peak_23416	chr21	44014159	44015156	-0.784487	0.0447282	Promoter (1-2kb)	TRAPPC10
Peak_22489	chr18	75226594	75227188	-0.781887	0.0474694	Intron (ENST00000322038.5/10194, intron 1 of 1)	TSHZ1
Peak_12717	chr1	65002257	65003669	-0.781171	0.0104947	Promoter (<=1kb)	LINC01359
Peak_4487	chr12	65822521	65828357	-0.780838	0.0198334	Promoter (<=1kb)	RPSAP52
Peak_8406	chr7	74209936	74211624	-0.780653	0.0208929	Promoter (<=1kb)	LAT2
Peak_401	chr4	53364627	53366951	-0.779875	0.0296317	Promoter (<=1kb)	SCFD2
Peak_12508	chr14	61471568	61472642	-0.777944	0.0184702	Intron (ENST00000555185.5/5583, intron 1 of 3)	PRKCH
Peak_17257	chr1	61042780	61043630	-0.776707	0.0451499	Intron (ENST00000371191.5/4774, intron 1 of 10)	NFIA
Peak_5421	chr15	45198032	45201704	-0.776681	0.0123693	Promoter (<=1kb)	SHF
Peak_11440	chr2	236536925	236539205	-0.776567	0.0263823	Distal Intergenic	ACKR3
Peak_16454	chr19	10286602	10288432	-0.774145	0.00319206	Promoter (<=1kb)	ICAM4
Peak_4356	chr1	167713159	167715498	-0.772971	0.0127142	Distal Intergenic	MPZL1
Peak_20887	chr6	161235949	161236359	-0.77293	0.0496602	Intron (ENST00000320285.9/56895, intron 1 of 8)	AGPAT4
Peak_19142	chr16	85157511	85158564	-0.770906	0.00876186	Distal Intergenic	GSE1
Peak_5203	chr20	346481	348694	-0.770312	0.0316758	Promoter (<=1kb)	NRSN2-AS1
Peak_11097	chr1	244729389	244730874	-0.768269	0.049846	3' UTR	DESI2
Peak_9684	chr15	42574775	42577044	-0.768079	0.0369183	Promoter (<=1kb)	STARD9
Peak_31220	chr7	2757432	2757721	-0.7673	0.0465444	Intron (ENST00000489665.1/155185, intron 4 of 4)	GNA12
Peak_21528	chr5	124735121	124735790	-0.76643	0.0310378	Exon (ENST00000507630.1/ENST00000507630.1, exon 1 of 1)	ZNF608
Peak_11921	chr3	114453968	114455665	-0.766337	0.0225668	Promoter (<=1kb)	ZBTB20
Peak_2288	chr3	25661690	25665951	-0.765922	0.0298338	Promoter (<=1kb)	MIR4442
Peak_332	chr16	69753654	69755334	-0.763793	0.0380892	Promoter (<=1kb)	NOB1
Peak_8103	chr7	6728892	6730716	-0.763713	0.0289556	Exon (ENST00000486256.5/441194, exon 4 of 14)	PMS2CL
Peak_3395	chr2	61694022	61695565	-0.763137	0.0110955	Distal Intergenic	FAM161A
Peak_4825	chr8	78665317	78667132	-0.761753	0.0137189	Promoter (<=1kb)	LOC105375911
Peak_7079	chr2	230864892	230867418	-0.761025	0.0267419	Promoter (<=1kb)	ITM2C
Peak_348	chr5	150409717	150412966	-0.75863	0.0491717	Promoter (<=1kb)	CD74
Peak_33699	chr15	85585456	85585996	-0.75836	0.0146979	5' UTR	AKAP13
Peak_3979	chr3	196638530	196642867	-0.757783	0.000301298	Promoter (<=1kb)	NRROS
Peak_16779	chr19	18432753	18433638	-0.757084	0.0238887	Promoter (<=1kb)	SSBP4
Peak_12006	chr14	104799664	104800362	-0.755407	0.0358224	Promoter (<=1kb)	ZBTB42
Peak_17593	chr7	1055059	1056619	-0.755386	0.0368578	Promoter (<=1kb)	GPR146
Peak_12884	chr13	46667712	46668693	-0.755249	0.0444385	Intron (ENST00000311191.10/23143, intron 2 of 18)	LRCH1
Peak_21105	chr16	566783	567541	-0.754664	0.0489347	Promoter (<=1kb)	NHLRC4
Peak_23306	chr11	20066427	20067000	-0.753973	0.0384296	Intron (ENST00000360655.8/89797, intron 20 of 37)	NAV2-AS2
Peak_19069	chr13	112874099	112874641	-0.752697	0.0438375	Promoter (<=1kb)	ATP11A
Peak_1493	chr22	23179551	23185363	-0.75152	6.59623e-06	Promoter (<=1kb)	BCR
Peak_11735	chr9	27527969	27529999	-0.750514	0.031613	Promoter (<=1kb)	LOC112268043
Peak_4086	chr11	4606559	4608672	-0.748837	0.0280177	Promoter (<=1kb)	TRIM68
Peak_24567	chr12	93803202	93803949	-0.748658	0.0445467	Intron (ENST00000549615.5/8738, intron 3 of 3)	CRADD
Peak_9397	chr2	74834060	74836840	-0.748201	0.0468535	Promoter (<=1kb)	HK2
Peak_5696	chr5	62578694	62583230	-0.747924	0.00484036	Promoter (<=1kb)	LRRC70
Peak_2757	chr3	50617150	50618725	-0.745876	0.0263184	Promoter (<=1kb)	MAPKAPK3
Peak_3115	chr12	102061015	102062480	-0.74449	0.0220538	Promoter (<=1kb)	WASHC3
Peak_2668	chr5	40678089	40684044	-0.742016	0.00028507	Promoter (<=1kb)	PTGER4
Peak_13093	chr2	66442417	66447431	-0.742	0.0105249	Promoter (<=1kb)	MEIS1
Peak_25234	chr14	77598716	77599442	-0.741961	0.0298848	Promoter (1-2kb)	SPTLC2
Peak_7744	chr12	75389312	75391861	-0.741947	0.00304023	Promoter (<=1kb)	GLIPR1L2
Peak_5226	chr7	29562996	29566941	-0.740129	0.0212869	Promoter (<=1kb)	PRR15-DT
Peak_16654	chr7	99379213	99381518	-0.740094	0.00781201	Intron (ENST00000638617.1/10095, intron 8 of 16)	ARPC1B
Peak_16373	chr6	16712097	16713620	-0.738193	0.00624189	Intron (ENST00000244769.8/6310, intron 3 of 8)	ATXN1
Peak_5692	chr16	57628487	57631333	-0.737872	0.0113657	Promoter (<=1kb)	ADGRG1
Peak_29545	chr10	114547726	114548030	-0.736968	0.0422503	Exon (ENST00000392955.7/3983, exon 5 of 23)	ABLIM1
Peak_17733	chr1	111515031	111516316	-0.736304	0.0354155	Intron (ENST00000369717.8/57413, intron 1 of 5)	TMIGD3
Peak_8115	chr1	148333718	148335730	-0.735621	0.0415981	Promoter (<=1kb)	MIR5087
Peak_9901	chr6	41560223	41561572	-0.735561	0.00869442	Intron (ENST00000307972.10/116113, intron 1 of 16)	FOXP4
Peak_24275	chr6	156634929	156635405	-0.734868	0.0455526	Distal Intergenic	LOC105378073
Peak_5798	chr9	127777490	127779526	-0.734858	0.00493989	Promoter (<=1kb)	SH2D3C
Peak_15097	chr5	131546942	131548482	-0.734567	0.0232183	Exon (ENST00000509018.6/51735, exon 6 of 28)	RAPGEF6
Peak_9043	chr7	128408804	128410837	-0.734364	0.0421562	Promoter (<=1kb)	IMPDH1
Peak_18510	chr1	19390649	19391996	-0.734169	0.00482641	Intron (ENST00000264202.8/832, intron 2 of 8)	CAPZB
Peak_14108	chr9	114610773	114611467	-0.733542	0.0435326	Promoter (<=1kb)	TMEM268
Peak_4316	chr7	100476286	100479864	-0.733279	0.00231559	Promoter (<=1kb)	TSC22D4
Peak_7448	chr1	202142728	202145715	-0.731476	0.0355683	Promoter (<=1kb)	ARL8A
Peak_16252	chr3	194203519	194204598	-0.730455	0.0259384	Promoter (<=1kb)	LINC02036
Peak_2331	chr17	57256701	57261499	-0.730306	0.000437883	Promoter (<=1kb)	MSI2
Peak_5074	chr9	112330644	112333658	-0.730094	0.0289556	Promoter (<=1kb)	PTBP3
Peak_24368	chr4	3388781	3389662	-0.728759	0.0370661	Intron (ENST00000506631.5/6002, intron 3 of 7)	RGS12
Peak_18786	chr16	85616154	85617483	-0.728614	0.0174005	Intron (ENST00000637419.1/23199, intron 2 of 2)	GSE1
Peak_16228	chr9	136881790	136882873	-0.72817	0.0172335	Promoter (<=1kb)	TRAF2
Peak_16898	chr7	138981616	138982481	-0.727916	0.040977	Promoter (<=1kb)	KIAA1549
Peak_12177	chr22	50620402	50622628	-0.727333	0.0470992	Distal Intergenic	ARSA
Peak_13028	chr15	91853925	91854987	-0.726938	0.0497804	Promoter (<=1kb)	SLCO3A1
Peak_6122	chr2	96760873	96764800	-0.726504	0.0013487	Promoter (<=1kb)	CNNM4
Peak_16940	chr17	40308831	40310233	-0.726492	0.0165874	Promoter (<=1kb)	RARA
Peak_10073	chr1	41916746	41919043	-0.726395	0.0063564	Promoter (<=1kb)	HIVEP3
Peak_20073	chr14	70981809	70983123	-0.726338	0.0460579	Intron (ENST00000554879.5/22990, intron 6 of 9)	PCNX1
Peak_12730	chr11	68854434	68856039	-0.725019	0.0372683	Distal Intergenic	CPT1A
Peak_23143	chr6	7145589	7146932	-0.724937	0.00352063	Intron (ENST00000379933.7/6239, intron 1 of 11)	RREB1
Peak_1162	chr12	9757359	9761794	-0.722902	0.0120316	Promoter (<=1kb)	CD69
Peak_14653	chr20	47353541	47356256	-0.72182	0.00108319	Promoter (<=1kb)	ZMYND8
Peak_7767	chr14	70640700	70643770	-0.719671	0.0130879	Promoter (<=1kb)	MED6
Peak_798	chr16	74998495	75003149	-0.719355	0.00228743	Promoter (<=1kb)	WDR59
Peak_9544	chr16	69725869	69727547	-0.718834	0.00362985	Promoter (<=1kb)	NQO1
Peak_2998	chr1	173866204	173869604	-0.718559	0.0403925	Promoter (<=1kb)	GAS5
Peak_4502	chr19	37333943	37335471	-0.717094	0.0468847	Promoter (<=1kb)	ZNF875
Peak_13651	chr4	169079630	169080813	-0.716466	0.0107864	Distal Intergenic	CBR4
Peak_961	chr10	61899003	61904985	-0.715714	0.00547493	Promoter (<=1kb)	ARID5B
Peak_28529	chr5	14675567	14676119	-0.712544	0.0429352	Intron (ENST00000503023.1/90268, intron 1 of 4)	OTULIN
Peak_19490	chr20	53692734	53693651	-0.71228	0.0368578	Distal Intergenic	ZNF217
Peak_5902	chr7	47580564	47582826	-0.711362	0.0298542	Promoter (<=1kb)	TNS3
Peak_4850	chr15	63599331	63602079	-0.710288	0.0304078	Promoter (<=1kb)	USP3-AS1
Peak_5205	chr20	44650446	44652814	-0.710238	0.0115696	Promoter (<=1kb)	ADA
Peak_18526	chr3	71455562	71456734	-0.709088	0.00389736	Intron (ENST00000649528.3/27086, intron 3 of 20)	FOXP1
Peak_9485	chr17	81832116	81833095	-0.708861	0.0272318	Promoter (<=1kb)	MCRIP1
Peak_17329	chr7	139105042	139105950	-0.704688	0.00878217	Intron (ENST00000242351.10/56829, intron 1 of 12)	ZC3HAV1
Peak_9735	chr15	74433261	74434559	-0.703921	0.0444385	Promoter (<=1kb)	SEMA7A
Peak_22329	chr6	41938421	41939648	-0.702963	0.0152406	Promoter (<=1kb)	CCND3
Peak_8306	chr11	113314081	113315426	-0.699715	0.0455526	Promoter (<=1kb)	TTC12
Peak_4470	chr9	3526103	3529664	-0.699134	0.00168437	Promoter (<=1kb)	RFX3
Peak_3855	chr12	93569401	93577294	-0.698917	0.00354124	Promoter (<=1kb)	SOCS2-AS1
Peak_13944	chr12	118357148	118359826	-0.698748	0.00654458	Promoter (<=1kb)	TAOK3
Peak_24573	chr12	14239431	14240519	-0.698219	0.0261016	Distal Intergenic	ATF7IP
Peak_21472	chr7	47494286	47494741	-0.696117	0.0448485	Intron (ENST00000311160.14/64759, intron 3 of 30)	TNS3
Peak_9606	chr12	12725712	12727255	-0.695952	0.0468535	Promoter (<=1kb)	DDX47
Peak_2108	chr7	5417324	5423870	-0.694903	0.00116485	Promoter (<=1kb)	TNRC18
Peak_7111	chr1	89842916	89844543	-0.694747	0.0302712	Promoter (<=1kb)	LRRC8D
Peak_10722	chr1	19644300	19646277	-0.694384	0.0232348	Promoter (<=1kb)	NBL1
Peak_1030	chr3	152268877	152273230	-0.694043	0.0169545	Promoter (<=1kb)	MBNL1-AS1
Peak_7160	chr4	109701468	109704350	-0.69369	0.0114303	Promoter (<=1kb)	CASP6
Peak_4309	chr15	70094580	70097958	-0.693416	0.00299294	Promoter (<=1kb)	TLE3
Peak_11854	chr16	88810639	88811952	-0.69324	0.0490966	Promoter (<=1kb)	APRT
Peak_6390	chr3	107429387	107432756	-0.689532	0.0478262	Promoter (<=1kb)	LINC01990
Peak_10426	chr12	121465644	121467326	-0.688952	0.0130879	Exon (ENST00000538243.1/84678, exon 1 of 5)	KDM2B
Peak_4182	chr6	2765445	2769462	-0.686621	0.000768248	Promoter (<=1kb)	WRNIP1
Peak_179	chr6	34886912	34891062	-0.685288	0.0102387	Promoter (<=1kb)	ANKS1A
Peak_14656	chr17	63930801	63932885	-0.684863	0.0127942	Promoter (<=1kb)	GH1
Peak_26049	chr15	74843363	74844023	-0.684463	0.0463848	Promoter (<=1kb)	ULK3
Peak_6427	chr14	73711845	73714873	-0.68423	0.00163581	Promoter (<=1kb)	PNMA1
Peak_5539	chr1	161067646	161070279	-0.683056	0.0142841	Promoter (<=1kb)	ARHGAP30
Peak_22486	chr5	151086506	151087251	-0.68123	0.0385913	Promoter (<=1kb)	TNIP1
Peak_16448	chr17	82228112	82229862	-0.67994	0.0349273	Promoter (<=1kb)	SLC16A3
Peak_5531	chr5	81748361	81750468	-0.679115	0.0166234	Promoter (<=1kb)	SSBP2
Peak_5579	chr11	65181689	65182955	-0.677518	0.0364914	Promoter (<=1kb)	LOC728975
Peak_2658	chr1	28580301	28583317	-0.677157	0.0424805	Promoter (<=1kb)	SNORA44
Peak_19627	chr9	130039142	130040535	-0.676559	0.00528828	Intron (ENST00000446176.7/23048, intron 1 of 16)	FNBP1
Peak_4762	chr4	75939576	75941486	-0.676337	0.0456942	Promoter (<=1kb)	NAAA
Peak_7635	chr2	190179811	190182382	-0.675892	0.0148555	Promoter (<=1kb)	C2orf88
Peak_7368	chr8	33564968	33567764	-0.674189	0.0146959	Promoter (<=1kb)	RNF122
Peak_4478	chr12	6950858	6954015	-0.673779	0.0239502	Promoter (<=1kb)	PTPN6
Peak_6705	chr6	89145360	89147693	-0.672298	0.0303528	Promoter (<=1kb)	LOC101929004
Peak_15476	chr8	55938907	55940243	-0.671463	0.0451113	Promoter (<=1kb)	LYN
Peak_22647	chr10	126961121	126961767	-0.668345	0.039766	Intron (ENST00000280333.9/1793, intron 1 of 51)	DOCK1
Peak_3360	chr12	124938001	124941352	-0.668325	0.00892637	Distal Intergenic	DHX37
Peak_9569	chr22	26588540	26590868	-0.668297	0.0216478	Promoter (<=1kb)	TPST2
Peak_10515	chr8	97775022	97778358	-0.667174	0.0358859	Promoter (<=1kb)	LAPTM4B
Peak_11348	chr15	90529101	90531218	-0.666925	0.0316927	Promoter (<=1kb)	CRTC3
Peak_32005	chr4	39946271	39946671	-0.66552	0.0418797	Intron (ENST00000303538.13/23244, intron 2 of 32)	PDS5A
Peak_8833	chr18	2905478	2907845	-0.662327	0.0248922	Promoter (<=1kb)	EMILIN2
Peak_4370	chr17	82448845	82450816	-0.661504	0.0136701	Promoter (<=1kb)	CYBC1
Peak_1134	chr12	54280647	54284635	-0.661194	0.0173191	Promoter (<=1kb)	HNRNPA1
Peak_6971	chr13	24270311	24273315	-0.661194	0.0034149	Promoter (<=1kb)	SPATA13
Peak_14644	chr3	133926962	133928285	-0.659401	0.0482384	Promoter (1-2kb)	C3orf36
Peak_7594	chr16	53207866	53211911	-0.659331	0.0389784	Promoter (<=1kb)	CHD9
Peak_6175	chr13	49584395	49586348	-0.659009	0.0487285	Promoter (<=1kb)	RCBTB1
Peak_21871	chr17	63701023	63701924	-0.655643	0.0352655	Promoter (<=1kb)	LIMD2
Peak_3355	chr1	206557139	206559770	-0.65554	0.0194688	Promoter (<=1kb)	RASSF5
Peak_5862	chr11	46347446	46349463	-0.655291	0.0122748	Promoter (<=1kb)	DGKZ
Peak_4308	chr13	50909393	50912114	-0.654435	0.0197705	Promoter (<=1kb)	RNASEH2B-AS1
Peak_8936	chr17	42286345	42290272	-0.652894	0.000702511	Promoter (<=1kb)	STAT5A
Peak_14642	chr22	31342520	31344523	-0.651442	0.00298272	Promoter (<=1kb)	PATZ1
Peak_28516	chr12	12613090	12613822	-0.650896	0.0489347	Promoter (1-2kb)	CREBL2
Peak_12823	chr3	42905613	42907276	-0.65046	0.0228479	Promoter (<=1kb)	ZNF662
Peak_11916	chr2	174632738	174635206	-0.648585	0.0084491	Promoter (<=1kb)	WIPF1
Peak_20335	chr4	159179509	159180534	-0.647807	0.0384296	Intron (ENST00000644474.1/9693, intron 1 of 29)	RAPGEF2
Peak_19644	chr14	61719370	61720536	-0.646201	0.0205248	Exon (ENST00000337138.9/3091, exon 2 of 15)	HIF1A
Peak_2979	chr11	67266468	67271586	-0.642718	0.00143518	Promoter (<=1kb)	GRK2
Peak_23447	chr7	106108424	106109400	-0.640806	0.0289556	Intron (ENST00000455385.7/6856, intron 1 of 4)	SYPL1
Peak_12825	chr11	47268454	47269638	-0.63948	0.0437046	Promoter (<=1kb)	MADD
Peak_1096	chr10	5975953	5978545	-0.638928	0.0208929	Promoter (<=1kb)	IL15RA
Peak_19873	chr18	24138493	24139707	-0.638013	0.0487518	Promoter (<=1kb)	CABYR
Peak_19588	chr12	116172315	116172819	-0.637595	0.0462359	Intron (ENST00000281928.9/23389, intron 2 of 30)	MIR620
Peak_2491	chr6	110873457	110880494	-0.63706	0.000213926	Promoter (<=1kb)	AMD1
Peak_12540	chr11	68869453	68870920	-0.636763	0.0282813	Promoter (<=1kb)	LINC02701
Peak_11737	chr5	177426708	177428795	-0.635593	0.0455526	Promoter (<=1kb)	GRK6
Peak_14411	chr1	207958679	207960066	-0.633551	0.0236568	Promoter (<=1kb)	LINC02767
Peak_11782	chr21	25561224	25563938	-0.633432	0.0133645	Promoter (<=1kb)	MIR155HG
Peak_7961	chr10	98445884	98447499	-0.627487	0.0403925	Promoter (<=1kb)	LOC101927278
Peak_9599	chr1	61052803	61054724	-0.626249	0.0259384	Promoter (<=1kb)	NFIA
Peak_3767	chr20	32761684	32765323	-0.62394	0.00592178	Promoter (<=1kb)	DNMT3B
Peak_7438	chr5	67003555	67008092	-0.621957	0.0135247	Promoter (<=1kb)	MAST4-AS1
Peak_6222	chr5	79235292	79239007	-0.620245	0.012991	Promoter (<=1kb)	JMY
Peak_11044	chr4	8198758	8201631	-0.618548	0.00883939	Promoter (<=1kb)	SH3TC1
Peak_6159	chr1	167630215	167633478	-0.615264	0.0327009	Promoter (<=1kb)	RCSD1
Peak_10120	chr16	69563861	69565743	-0.611582	0.0201192	Promoter (<=1kb)	NFAT5
Peak_10670	chr1	153544522	153546236	-0.61134	0.030503	Promoter (<=1kb)	S100A4
Peak_10035	chr10	96042945	96045389	-0.604312	0.0433074	Promoter (<=1kb)	CCNJ
Peak_4572	chr11	11840923	11844239	-0.602563	0.0441751	Promoter (<=1kb)	USP47
Peak_8522	chr17	75130569	75132130	-0.602394	0.048288	Promoter (<=1kb)	NT5C
Peak_831	chr4	151011631	151016849	-0.602315	0.00059526	Promoter (<=1kb)	LRBA
Peak_7893	chr1	44819092	44821010	-0.598277	0.0422503	3' UTR	PTCH2
Peak_8449	chr11	47375861	47379058	-0.59537	0.0280611	Promoter (<=1kb)	SPI1
Peak_2596	chr6	149317857	149321796	-0.594869	0.00487569	Promoter (<=1kb)	TAB2
Peak_16599	chr7	23345698	23347945	-0.591683	0.0183772	Promoter (<=1kb)	IGF2BP3
Peak_11948	chr12	53601308	53602381	-0.591672	0.0409184	Intron (ENST00000648881.1/ENST00000648881.1, intron 4 of 6)	ATF7
Peak_6821	chr1	154325539	154329328	-0.59131	0.0356083	Promoter (<=1kb)	ATP8B2
Peak_7848	chr5	139480507	139482957	-0.590957	0.0485601	Promoter (<=1kb)	STING1
Peak_4789	chr12	53674805	53677729	-0.589652	0.0483011	Promoter (<=1kb)	ATP5MC2
Peak_3578	chr6	26155330	26160597	-0.589356	0.0252373	Promoter (<=1kb)	H1-4
Peak_9629	chr17	31309706	31314490	-0.586456	0.0360343	Promoter (<=1kb)	EVI2B
Peak_8607	chr15	51735150	51738355	-0.584571	0.0200421	Promoter (<=1kb)	LYSMD2
Peak_371	chr8	81839613	81842305	-0.583411	0.0163622	Promoter (<=1kb)	LINC02235
Peak_4592	chr2	159903077	159905419	-0.581588	0.0147102	Promoter (<=1kb)	LY75-CD302
Peak_9112	chr3	159988316	159990443	-0.581156	0.0313443	Promoter (<=1kb)	IL12A
Peak_11328	chr7	101235657	101238571	-0.57925	0.0214428	Promoter (<=1kb)	CLDN15
Peak_5231	chr12	21656206	21658200	-0.5709	0.0463132	Promoter (<=1kb)	GYS2
Peak_15463	chr6	136783712	136785995	-0.568235	0.0125121	Promoter (<=1kb)	LOC101928429
Peak_319	chr1	113928229	113932552	-0.568166	0.0376155	Promoter (<=1kb)	HIPK1-AS1
Peak_14886	chr7	137934548	137936503	-0.564459	0.0049207	Promoter (<=1kb)	CREB3L2
Peak_8185	chr11	126354491	126357219	-0.564444	0.0215043	Promoter (<=1kb)	GSEC
Peak_2585	chr6	116681135	116683124	-0.564135	0.0374458	Promoter (<=1kb)	KPNA5
Peak_1233	chr7	139106132	139110590	-0.562116	0.00494541	Promoter (<=1kb)	ZC3HAV1
Peak_12363	chr12	122773798	122774916	-0.561158	0.0298417	Promoter (<=1kb)	CCDC62
Peak_17254	chr14	50362812	50364150	-0.560076	0.0302712	Promoter (<=1kb)	CDKL1
Peak_2080	chr8	55878166	55882488	-0.557463	0.00849519	Promoter (<=1kb)	LYN
Peak_8374	chr18	23134461	23138126	-0.557182	0.0326698	Promoter (<=1kb)	CABLES1
Peak_5845	chr4	67543343	67546298	-0.552101	0.0272978	Promoter (<=1kb)	CENPC
Peak_3620	chr1	184385945	184389688	-0.551965	0.0375644	Promoter (<=1kb)	C1orf21
Peak_5411	chr18	32017952	32020707	-0.551776	0.040977	Promoter (<=1kb)	RNF125
Peak_1862	chr7	16644127	16647972	-0.548903	0.0445031	Promoter (<=1kb)	BZW2
Peak_11258	chr7	105677575	105679711	-0.548182	0.040977	Promoter (<=1kb)	ATXN7L1
Peak_8422	chr15	85689558	85692159	-0.544132	0.0173191	Promoter (<=1kb)	AKAP13
Peak_4050	chr1	39204195	39207596	-0.543846	0.0160166	Promoter (<=1kb)	MACF1
Peak_4161	chr2	201232912	201236557	-0.543612	0.010369	Promoter (<=1kb)	CASP8
Peak_3728	chr1	155974090	155979918	-0.542652	0.0421784	Promoter (<=1kb)	ARHGEF2-AS2
Peak_936	chr2	43218820	43228658	-0.542576	0.0316927	Promoter (<=1kb)	LINC01126
Peak_315	chr12	10720810	10724557	-0.542044	0.0468847	Promoter (<=1kb)	YBX3
Peak_21777	chr1	31944042	31945120	-0.539894	0.0498378	Promoter (<=1kb)	PTP4A2
Peak_7668	chr9	125888804	125890805	-0.538618	0.0465002	Intron (ENST00000342287.9/5090, intron 2 of 7)	PBX3
Peak_700	chr1	100350988	100354387	-0.534789	0.0436126	Promoter (<=1kb)	CDC14A
Peak_5499	chr12	93740488	93743571	-0.53357	0.0275846	Intron (ENST00000549615.5/8738, intron 2 of 3)	LOC101928731
Peak_19284	chr12	123267760	123269629	-0.532149	0.0332338	Promoter (<=1kb)	CDK2AP1
Peak_4426	chr2	171521684	171524781	-0.530688	0.0170493	Promoter (<=1kb)	CYBRD1
Peak_6857	chr9	87497044	87501249	-0.529863	0.0120579	Promoter (<=1kb)	DAPK1
Peak_9415	chr11	102316943	102319073	-0.524675	0.0379313	Promoter (<=1kb)	BIRC3
Peak_7550	chr3	23809769	23811668	-0.523422	0.0193376	Promoter (<=1kb)	UBE2E1
Peak_5026	chr1	202805046	202809184	-0.521493	0.0343682	Promoter (<=1kb)	KDM5B
Peak_6856	chr18	31682786	31686659	-0.516996	0.0352655	Promoter (<=1kb)	B4GALT6
Peak_5618	chr20	63978162	63982130	-0.516742	0.0488922	Promoter (<=1kb)	SAMD10
Peak_1044	chr19	55252972	55259096	-0.514587	0.00389736	Promoter (<=1kb)	PPP6R1
Peak_918	chr1	107056001	107058426	-0.514234	0.0378607	Promoter (<=1kb)	PRMT6
Peak_9249	chr7	26151495	26154574	-0.512627	0.0154181	Promoter (<=1kb)	NFE2L3
Peak_4189	chr2	11746620	11749486	-0.507444	0.0425537	Promoter (<=1kb)	LPIN1
Peak_5250	chr8	115665173	115669141	-0.505317	0.0354022	Promoter (<=1kb)	TRPS1
Peak_1487	chr3	15792183	15798311	-0.505094	0.0122748	Promoter (<=1kb)	ANKRD28
Peak_3594	chr1	65064823	65069869	-0.50353	0.0344252	Promoter (<=1kb)	JAK1
Peak_3583	chr3	4491764	4496479	-0.50189	0.0393457	Promoter (<=1kb)	ITPR1-DT
Peak_9636	chr19	38263736	38266056	-0.50114	0.030192	Promoter (<=1kb)	SPINT2
Peak_5820	chr14	61320870	61324498	-0.494993	0.0455169	Promoter (<=1kb)	PRKCH
Peak_3457	chr20	17965374	17972083	-0.488159	0.0095472	Promoter (<=1kb)	SNX5
Peak_2681	chr11	64205567	64208847	-0.486126	0.0447282	Promoter (<=1kb)	FERMT3
Peak_6185	chr16	31201090	31203480	-0.480358	0.030503	Promoter (<=1kb)	PYCARD-AS1
Peak_1203	chr5	78507390	78511027	-0.479199	0.04344	5' UTR	LHFPL2
Peak_845	chr1	159921389	159926504	-0.472131	0.031296	Promoter (<=1kb)	TAGLN2
Peak_3764	chr2	24358670	24361261	-0.469081	0.0447282	Promoter (<=1kb)	ITSN2
Peak_11786	chr13	49628086	49629591	-0.451353	0.0450544	Promoter (<=1kb)	ARL11
Peak_8808	chr1	15408982	15412502	-0.450202	0.031296	Promoter (<=1kb)	EFHD2-AS1
Peak_180	chr7	26196809	26204890	-0.445233	0.0442435	Promoter (<=1kb)	CBX3
Peak_23005	chr7	139094541	139095890	-0.404319	0.0439797	Intron (ENST00000242351.10/56829, intron 1 of 12)	ZC3HAV1
Peak_3973	chr7	37349716	37354243	-0.358117	0.0223616	Promoter (<=1kb)	ELMO1
Peak_1605	chr5	40833256	40835970	0.413629	0.0456331	Promoter (<=1kb)	RPL37
Peak_12087	chr19	4915398	4917167	0.42606	0.040977	Intron (ENST00000612630.4/29128, intron 2 of 16)	UHRF1
Peak_313	chr9	125238016	125241381	0.432804	0.0314692	Promoter (<=1kb)	HSPA5
Peak_10200	chr2	58045670	58047948	0.437363	0.0385913	Promoter (<=1kb)	LOC107984043
Peak_2082	chr8	18082008	18085909	0.437614	0.0354155	Promoter (<=1kb)	ASAH1-AS1
Peak_20741	chr5	135359445	135361359	0.441541	0.045962	Promoter (1-2kb)	MACROH2A1
Peak_4062	chr4	183443273	183446856	0.444674	0.0468624	Promoter (<=1kb)	CDKN2AIP
Peak_19723	chr12	120537538	120539166	0.450808	0.0456331	Intron (ENST00000542438.1/9921, intron 2 of 4)	RNF10
Peak_8630	chr6	52575756	52577054	0.453853	0.0422751	Promoter (<=1kb)	TRAM2-AS1
Peak_2077	chr5	112976133	112978513	0.462841	0.0280177	Promoter (<=1kb)	DCP2
Peak_4421	chr8	95133193	95136321	0.463393	0.0431589	Promoter (<=1kb)	PLEKHF2
Peak_10873	chr17	75783944	75786530	0.465268	0.00553424	Promoter (<=1kb)	MIR4738
Peak_6276	chr11	72038821	72042957	0.465337	0.0185997	Promoter (<=1kb)	NUMA1
Peak_12656	chr2	151287439	151289078	0.467115	0.0159453	Promoter (<=1kb)	NMI
Peak_605	chr1	179953579	179956868	0.471929	0.029029	Promoter (<=1kb)	CEP350
Peak_1080	chr16	70522347	70525729	0.475096	0.0318913	Promoter (<=1kb)	SF3B3
Peak_10132	chr19	2235042	2238200	0.477422	0.0154181	Promoter (<=1kb)	MIR6789
Peak_3528	chr2	171893210	171894953	0.477899	0.0375249	Promoter (<=1kb)	SLC25A12
Peak_6366	chr1	150628110	150630602	0.479472	0.048288	Promoter (<=1kb)	ENSA
Peak_3905	chr17	64495525	64497766	0.48498	0.036932	Promoter (<=1kb)	POLG2
Peak_4005	chr18	9474344	9477938	0.486876	0.0181532	Promoter (<=1kb)	RALBP1
Peak_3500	chr1	114509211	114512678	0.491503	0.0188056	Promoter (<=1kb)	TRIM33
Peak_1609	chr1	46300874	46304909	0.492151	0.0496602	Promoter (<=1kb)	LRRC41
Peak_7733	chr2	127700697	127702790	0.500969	0.0415981	Promoter (<=1kb)	SFT2D3
Peak_3944	chr15	74871857	74873920	0.502916	0.0292965	Promoter (<=1kb)	SCAMP2
Peak_6674	chr2	112583567	112585666	0.506078	0.0366962	Promoter (<=1kb)	CHCHD5
Peak_3234	chr5	112707060	112709038	0.508215	0.0352655	Promoter (<=1kb)	APC
Peak_11106	chr11	6389633	6391421	0.508555	0.0489625	Promoter (<=1kb)	SMPD1
Peak_2982	chr2	46914436	46917105	0.510875	0.0486355	Promoter (<=1kb)	TTC7A
Peak_2113	chr13	108217642	108219900	0.512305	0.0298272	Promoter (<=1kb)	LIG4
Peak_9730	chr13	52158595	52159965	0.512319	0.0242434	Promoter (<=1kb)	NEK3
Peak_413	chr5	43064422	43068898	0.515715	0.00941662	Promoter (<=1kb)	LOC100506639
Peak_16260	chr3	10142492	10143269	0.520741	0.0329145	Promoter (<=1kb)	VHL
Peak_8412	chr8	60516213	60519337	0.523301	0.0433168	Promoter (<=1kb)	LINC01301
Peak_3908	chr11	78077946	78080458	0.523863	0.0314703	Promoter (<=1kb)	NDUFC2-KCTD14
Peak_4427	chr2	207162842	207166206	0.525735	0.049342	Promoter (<=1kb)	MYOSLID
Peak_16893	chr16	67528836	67531282	0.527167	0.0467701	Promoter (<=1kb)	RIPOR1
Peak_6906	chr15	75843446	75845497	0.529664	0.0366617	Promoter (<=1kb)	UBE2Q2
Peak_1667	chr7	135661925	135663627	0.530336	0.0499532	Promoter (<=1kb)	LOC105375521
Peak_129	chr1	207049660	207051747	0.531344	0.0363823	Promoter (<=1kb)	YOD1
Peak_3658	chr5	181245316	181247470	0.532803	0.0290372	Promoter (<=1kb)	CTC-338M12.4
Peak_6720	chr12	750781	756038	0.538478	0.0337331	Promoter (<=1kb)	WNK1
Peak_4439	chr5	43037281	43043600	0.540891	0.0117779	Promoter (<=1kb)	LOC153684
Peak_15593	chr6	15244157	15245191	0.543476	0.0453566	Promoter (<=1kb)	JARID2
Peak_4043	chr10	68955398	68957774	0.546614	0.0484116	Promoter (<=1kb)	DDX21
Peak_4663	chr6	44386752	44389314	0.548142	0.0133645	Promoter (<=1kb)	CDC5L
Peak_13607	chr7	99392643	99393615	0.550309	0.0448802	Promoter (<=1kb)	ARPC1B
Peak_2547	chr17	7931235	7933784	0.553149	0.0380892	Promoter (<=1kb)	CNTROB
Peak_9153	chr17	44065499	44067618	0.553412	0.035101	Promoter (<=1kb)	LSM12
Peak_10336	chr22	37281902	37284879	0.557649	0.00461973	Promoter (<=1kb)	CYTH4
Peak_5664	chr16	20899224	20901907	0.56001	0.0458516	Promoter (<=1kb)	ERI2
Peak_6298	chr1	1614053	1616965	0.561411	0.0488922	Promoter (<=1kb)	MIB2
Peak_5297	chr8	123072252	123073948	0.56312	0.0489923	Promoter (<=1kb)	TBC1D31
Peak_11645	chr12	51024516	51026856	0.564022	0.0468847	Promoter (<=1kb)	SLC11A2
Peak_7750	chr1	224182328	224184583	0.565095	0.00572666	Promoter (<=1kb)	DEGS1
Peak_7833	chr6	13272624	13275798	0.567958	0.00883939	Promoter (<=1kb)	TBC1D7-LOC100130357
Peak_2437	chr1	161398850	161400801	0.568632	0.0455526	Exon (ENST00000636161.1/ENST00000636161.1, exon 1 of 2)	CFAP126
Peak_1514	chr3	180912069	180914485	0.569141	0.0479943	Promoter (<=1kb)	FXR1
Peak_8002	chr1	180154866	180156127	0.576011	0.0474463	Promoter (<=1kb)	QSOX1
Peak_7843	chr17	42458877	42460972	0.577514	0.0186806	Promoter (<=1kb)	ATP6V0A1
Peak_31222	chr7	35692705	35693396	0.580955	0.0146178	Promoter (1-2kb)	HERPUD2
Peak_751	chr6	108294167	108295954	0.581632	0.0158216	Promoter (<=1kb)	AFG1L
Peak_11537	chr7	150322369	150324563	0.582459	0.030503	Promoter (<=1kb)	ACTR3C
Peak_7628	chr19	55406516	55407828	0.58638	0.0468118	Promoter (<=1kb)	UBE2S
Peak_8583	chr1	25858742	25860724	0.588828	0.0107467	Promoter (<=1kb)	AUNIP
Peak_671	chr8	17921713	17924529	0.590635	0.0453192	Promoter (<=1kb)	PCM1
Peak_3691	chr2	135051748	135053749	0.590669	0.0181502	Promoter (<=1kb)	RAB3GAP1
Peak_6324	chr17	76725435	76728309	0.591051	0.00332741	Promoter (<=1kb)	METTL23
Peak_350	chr2	37082914	37085373	0.592398	0.0161823	Promoter (<=1kb)	GPATCH11
Peak_6931	chr2	38600816	38603804	0.592614	0.0487518	Promoter (<=1kb)	HNRNPLL
Peak_26312	chr5	131266323	131266760	0.59302	0.0265764	Intron (ENST00000502840.5/56990, intron 2 of 3)	CDC42SE2
Peak_1675	chr9	34178130	34180484	0.593562	0.0146178	Promoter (<=1kb)	UBAP1
Peak_8001	chr10	44976830	44978965	0.594044	0.0425789	Promoter (<=1kb)	DEPP1
Peak_35712	chr11	64876515	64877033	0.594173	0.0118584	Promoter (<=1kb)	EHD1
Peak_2544	chr7	54757848	54760085	0.595317	0.010745	Promoter (<=1kb)	SEC61G-DT
Peak_4024	chr3	152834239	152837399	0.595441	0.0139031	Promoter (<=1kb)	P2RY1
Peak_1873	chr13	46796082	46797723	0.59708	0.0172407	Promoter (<=1kb)	ESD
Peak_4510	chr2	61469253	61470790	0.597322	0.0432192	Promoter (<=1kb)	USP34
Peak_10569	chr9	35489166	35491273	0.598536	0.0174652	Promoter (<=1kb)	RUSC2
Peak_3852	chr10	35126831	35128507	0.599165	0.0320677	Promoter (<=1kb)	CREM
Peak_10129	chr18	77130145	77133444	0.602589	0.00387494	Promoter (<=1kb)	MBP
Peak_969	chr5	160417809	160420285	0.603942	0.00592178	Promoter (<=1kb)	SLU7
Peak_1024	chr22	40854743	40858337	0.604047	0.0101178	Promoter (<=1kb)	XPNPEP3
Peak_3447	chr11	62599651	62601929	0.607495	0.0393805	Promoter (<=1kb)	MTA2
Peak_10549	chr11	61160665	61162345	0.607619	0.040977	Promoter (<=1kb)	VPS37C
Peak_6127	chr18	35343193	35345042	0.608723	0.0157453	Promoter (<=1kb)	ZNF24
Peak_7019	chr6	33710688	33712131	0.610469	0.0392055	Promoter (<=1kb)	UQCC2
Peak_10516	chr6	144215575	144217287	0.611869	0.0424805	Distal Intergenic	STX11
Peak_5968	chr1	223843976	223845958	0.612529	0.0118235	Promoter (<=1kb)	TP53BP2
Peak_5196	chr19	2149971	2151586	0.614413	0.0199	Promoter (<=1kb)	AP3D1
Peak_7158	chr22	31752921	31754764	0.614427	0.0400222	Promoter (<=1kb)	DEPDC5
Peak_8396	chr4	472863	474545	0.617208	0.0495373	Promoter (<=1kb)	ZNF721
Peak_6294	chr9	214393	216303	0.61851	0.0477062	Promoter (<=1kb)	DOCK8-AS1
Peak_896	chr3	44974404	44977478	0.618572	0.0182016	Promoter (<=1kb)	EXOSC7
Peak_14	chr2	197432951	197436264	0.618791	0.0401102	Promoter (<=1kb)	SF3B1
Peak_4831	chr7	127584105	127586102	0.619555	0.0130879	Promoter (<=1kb)	GCC1
Peak_10385	chr6	27814628	27815937	0.619679	0.0266487	Promoter (<=1kb)	H2AC14
Peak_9374	chr15	52566914	52569441	0.622519	0.004645	Promoter (<=1kb)	ARPP19
Peak_2646	chr2	151826717	151829077	0.623259	0.00726425	Promoter (<=1kb)	ARL5A
Peak_18497	chr8	133059369	133060524	0.626216	0.0291839	Promoter (<=1kb)	SLA
Peak_5446	chr12	64758620	64760274	0.626235	0.0433973	Promoter (<=1kb)	TBC1D30
Peak_1685	chr11	4093914	4096057	0.627114	0.00610524	Promoter (<=1kb)	RRM1
Peak_8723	chr10	46021986	46024118	0.628758	0.0432665	Promoter (<=1kb)	NCOA4
Peak_8597	chr5	891635	893620	0.62965	0.0126564	Promoter (<=1kb)	BRD9
Peak_2773	chr1	204515886	204517902	0.630124	0.00788596	Promoter (<=1kb)	MDM4
Peak_3857	chr13	45338582	45341285	0.630291	0.0274912	Promoter (<=1kb)	TPT1
[truncated: 536 more rows]

## Sheet: C3 vs C1 FDR < 0.05
Region ID	Chromosome	Start	End	Log2FoldChange	FDR	Annotation	Gene symbol
Peak_21339	chr6	20564615	20564995	-3.78641	4.21777e-05	Intron (ENST00000274695.8/54901, intron 4 of 15)	CDKAL1
Peak_34137	chr3	23324924	23325218	-3.28488	0.000499154	Intron (ENST00000425792.5/7325, intron 3 of 5)	UBE2E2
Peak_35420	chr1	160540507	160540885	-3.2299	0.000545608	Intron (ENST00000446952.1/105371468, intron 1 of 1)	LOC105371468
Peak_34496	chr10	54621628	54622035	-2.9968	0.00117478	Intron (ENST00000422842.1/105378311, intron 4 of 5)	MIR548F1
Peak_26785	chr17	42457041	42457443	-2.87514	0.000204192	Promoter (1-2kb)	ATP6V0A1
Peak_35965	chr20	4012721	4013036	-2.84244	0.000387397	Intron (ENST00000336095.10/11237, intron 1 of 5)	RNF24
Peak_38568	chr2	133560569	133560829	-2.83879	0.000773652	Intron (ENST00000409261.6/344148, intron 1 of 19)	NCKAP5
Peak_25269	chr9	24698990	24699353	-2.81919	0.00280931	Distal Intergenic	IZUMO3
Peak_33589	chr6	148557653	148558104	-2.8165	4.03726e-06	Distal Intergenic	SASH1
Peak_17028	chr1	80674048	80674725	-2.81079	0.00492105	Distal Intergenic	LINC01781
Peak_26716	chr6	167833269	167833518	-2.80897	0.0010404	Intron (ENST00000683244.1/4301, intron 1 of 33)	AFDN
Peak_33880	chr1	207923991	207924213	-2.77518	0.00329036	Distal Intergenic	CD34
Peak_27350	chr4	5866194	5866406	-2.73225	0.0020217	Intron (ENST00000506216.5/1400, intron 2 of 12)	CRMP1
Peak_25722	chr1	93414768	93415046	-2.70872	0.000979568	Distal Intergenic	FNBP1L
Peak_17637	chr1	161727190	161727795	-2.69004	6.18993e-06	Promoter (1-2kb)	FCRLB
Peak_17535	chr2	113390013	113390516	-2.67972	0.00385894	Intron (ENST00000653674.1/101927400, intron 2 of 3)	LOC101927400
Peak_31026	chr3	31213954	31214467	-2.6695	0.000179622	Distal Intergenic	MIR466
Peak_29323	chr2	196268435	196268767	-2.64771	0.00125876	Intron (ENST00000260983.8/57520, intron 17 of 28)	HECW2-AS1
Peak_32078	chr8	93158953	93159243	-2.64545	5.19316e-06	Intron (ENST00000521906.5/389676, intron 1 of 2)	LINC02906
Peak_49765	chr12	76901882	76902231	-2.63087	0.00892737	Distal Intergenic	CSRP2
Peak_31455	chr21	42465124	42465411	-2.59896	0.000101306	Distal Intergenic	RSPH1-DT
Peak_11387	chr4	183407279	183407820	-2.58766	0.00750428	Distal Intergenic	CDKN2AIP
Peak_26791	chr8	69676609	69676783	-2.557	0.000295129	3' UTR	LOC105375889
Peak_22913	chr6	36032326	36032847	-2.5556	0.000210388	Intron (ENST00000622903.4/1432, intron 1 of 6)	MAPK14
Peak_31863	chr11	118240785	118241013	-2.55299	0.00453587	Intron (ENST00000278949.9/196264, intron 1 of 5)	MPZL3
Peak_8110	chr13	91346633	91348147	-2.54629	8.25687e-05	Promoter (<=1kb)	MIR17HG
Peak_25406	chr2	143110714	143110994	-2.53116	0.028386	Intron (ENST00000409869.5/55843, intron 2 of 6)	ARHGAP15
Peak_24504	chr18	67243994	67244467	-2.52806	0.0145369	Distal Intergenic	MIR5011
Peak_17218	chr7	2406521	2406968	-2.50182	8.53144e-07	Intron (ENST00000258711.7/55501, intron 1 of 1)	CHST12
Peak_37855	chr8	57753556	57753739	-2.49726	0.00502511	Intron (ENST00000520426.1/ENST00000520426.1, intron 2 of 2)	LOC286178
Peak_22514	chr11	102560606	102560967	-2.49119	0.00230198	Distal Intergenic	MMP20
Peak_24472	chr3	141558272	141558570	-2.48833	0.000638421	Intron (ENST00000286364.9/5922, intron 7 of 23)	RASA2
Peak_10683	chr5	166983159	166984112	-2.48087	0.00640365	Distal Intergenic	LINC01947
Peak_31940	chr13	71613258	71613564	-2.47128	9.69945e-07	Intron (ENST00000611519.4/1602, intron 3 of 7)	DACH1
Peak_32038	chr8	69676025	69676473	-2.46659	0.000170967	Intron (ENST00000260126.9/81796, intron 9 of 9)	LOC105375889
Peak_41955	chr1	90340110	90340509	-2.46354	0.00399733	Distal Intergenic	LOC105378850
Peak_35625	chr8	59054652	59054832	-2.4531	0.0210074	Intron (ENST00000361421.2/9760, intron 1 of 8)	LOC100505501
Peak_34030	chr12	58901132	58901322	-2.44734	0.0116382	Intron (ENST00000379141.8/121227, intron 3 of 18)	LRIG3
Peak_27262	chr21	16037821	16038196	-2.44411	0.012634	Intron (ENST00000635845.1/388815, intron 1 of 5)	MIR99AHG
Peak_37894	chr13	41004845	41005323	-2.44161	0.000385388	Intron (ENST00000239882.7/1997, intron 1 of 8)	ELF1
Peak_26112	chr17	64985557	64986015	-2.42705	0.000701695	Distal Intergenic	AMZ2P1
Peak_43986	chr17	61139132	61139388	-2.42016	0.000613023	Intron (ENST00000407086.8/54828, intron 22 of 23)	LOC107984992
Peak_27255	chr10	29304725	29305007	-2.41292	0.0050491	Intron (ENST00000375500.8/84569, intron 3 of 4)	LYZL1
Peak_34560	chr3	169142451	169142769	-2.3944	9.3062e-06	Intron (ENST00000264674.7/2122, intron 3 of 16)	MECOM
Peak_24606	chr3	13648040	13648379	-2.39353	0.0109128	Distal Intergenic	LINC00620
Peak_31470	chr16	17949765	17950098	-2.38428	0.00369248	Intron (ENST00000569048.5/107984893, intron 3 of 3)	LOC107984893
Peak_15643	chr4	67558514	67559364	-2.38102	0.000162252	Promoter (<=1kb)	STAP1
Peak_26820	chr17	1197600	1198072	-2.35659	0.000167287	Intron (ENST00000574139.7/29, intron 1 of 22)	ABR
Peak_2244	chr2	144517022	144520447	-2.35128	3.961e-05	Promoter (<=1kb)	ZEB2-AS1
Peak_22591	chr13	105363863	105364084	-2.34906	0.0142333	Distal Intergenic	LOC105370344
Peak_33963	chr5	87340639	87340890	-2.34	0.00610539	Intron (ENST00000274376.11/5921, intron 5 of 24)	RASA1
Peak_15445	chr8	24511693	24512064	-2.33587	0.0170564	Exon (ENST00000519364.5/101929315, exon 3 of 5)	LOC101929315
Peak_31472	chr9	14022352	14022516	-2.32722	6.29933e-05	Distal Intergenic	NFIB
Peak_22199	chr14	99752674	99753144	-2.31972	0.000842487	Intron (ENST00000554479.5/2009, intron 1 of 10)	EML1
Peak_35011	chr12	96121295	96121564	-2.31693	0.00445943	Distal Intergenic	LINC02452
Peak_27299	chr5	138240826	138241135	-2.31292	0.00548923	Distal Intergenic	CDC23
Peak_33940	chr21	17003876	17004310	-2.30759	0.00908951	Distal Intergenic	MIR99AHG
Peak_16019	chr13	71610874	71611550	-2.30416	1.14564e-05	Intron (ENST00000611519.4/1602, intron 3 of 7)	DACH1
Peak_20090	chr6	142902675	142902937	-2.30282	0.00110175	Intron (ENST00000012134.7/3097, intron 1 of 8)	HIVEP2
Peak_38576	chr22	40533895	40534078	-2.30007	0.00358423	Promoter (<=1kb)	MRTFA
Peak_42026	chr2	46569309	46569595	-2.28505	0.00167013	Exon (ENST00000506009.2/100506142, exon 2 of 2)	RHOQ
Peak_28901	chr6	81766606	81767135	-2.28168	0.00897126	Distal Intergenic	TENT5A
Peak_25393	chr4	148375937	148376539	-2.27964	0.00410474	Intron (ENST00000344721.8/4306, intron 2 of 8)	NR3C2
Peak_24563	chr14	70886720	70887256	-2.27435	0.000704324	Distal Intergenic	PCNX1
Peak_22794	chr19	3275310	3275978	-2.26988	0.00277365	Promoter (1-2kb)	CELF5
Peak_39946	chr11	9858891	9859061	-2.26383	0.0105366	Intron (ENST00000533659.1/101928008, intron 1 of 2)	SBF2
Peak_20847	chr13	22162949	22163465	-2.26357	0.0219781	Intron (ENST00000657205.1/100506622, intron 1 of 3)	LINC00540
Peak_35295	chr7	106731561	106731855	-2.25426	0.00280931	Promoter (<=1kb)	CTB-30L5.1
Peak_26603	chr1	164562221	164563247	-2.25222	3.94216e-07	Promoter (<=1kb)	PBX1
Peak_31865	chr7	20164540	20164745	-2.25117	0.0349375	Intron (ENST00000400331.10/346389, intron 2 of 6)	MACC1
Peak_17722	chr4	15755912	15756414	-2.24203	0.00428544	Distal Intergenic	CD38
Peak_23309	chr21	29656992	29657211	-2.24094	0.0123189	Intron (ENST00000327783.8/2897, intron 4 of 17)	GRIK1-AS2
Peak_48391	chr7	25895129	25895484	-2.23145	3.2419e-05	Distal Intergenic	MIR148A
Peak_31811	chr1	109370988	109371202	-2.22644	0.0017307	Promoter (1-2kb)	SORT1
Peak_16035	chr12	29563640	29564390	-2.22433	0.000663773	Intron (ENST00000539277.6/83857, intron 9 of 17)	TMTC1
Peak_1716	chr6	95576120	95577456	-2.21885	0.029025	Promoter (<=1kb)	MANEA-DT
Peak_15357	chr3	24677822	24678590	-2.21784	1.79626e-06	Intron (ENST00000630391.1/ENST00000630391.1, intron 4 of 4)	RARB
Peak_1758	chr2	68252685	68253887	-2.21152	0.0242723	Promoter (<=1kb)	PPP3R1
Peak_28385	chr22	24511249	24511488	-2.21148	0.0176926	Intron (ENST00000415388.5/51733, intron 3 of 8)	UPB1
Peak_26774	chr15	41695858	41696211	-2.20932	3.92223e-05	5' UTR	MIR626
Peak_21726	chr5	56050672	56051195	-2.20798	0.0480279	Intron (ENST00000645512.1/105378976, intron 2 of 3)	LOC105378976
Peak_17708	chr3	136758363	136758694	-2.20621	2.1436e-06	Distal Intergenic	STAG1
Peak_20856	chr3	174156163	174156575	-2.20492	0.0469885	Intron (ENST00000457714.5/22871, intron 4 of 6)	NLGN1
Peak_23100	chr7	104857617	104858057	-2.19565	0.0197045	Intron (ENST00000401970.3/375612, intron 3 of 3)	LHFPL3-AS1
Peak_23435	chr7	6228514	6228845	-2.1882	0.00081603	Intron (ENST00000396741.3/9265, intron 1 of 12)	CYTH3
Peak_25736	chr1	182259512	182259809	-2.18272	0.000421369	Intron (ENST00000663078.1/400799, intron 1 of 4)	LINC01344
Peak_29337	chr3	58074397	58074777	-2.16548	2.33007e-06	Intron (ENST00000682097.1/2317, intron 1 of 12)	FLNB
Peak_26133	chr18	23662144	23662514	-2.15512	0.0174899	Promoter (<=1kb)	ANKRD29
Peak_28432	chr5	158642650	158642851	-2.15315	0.0122432	Distal Intergenic	EBF1
Peak_16687	chr4	64158610	64158976	-2.14477	0.0497892	Distal Intergenic	TECRL
Peak_28926	chr4	101288800	101289081	-2.14395	0.0115543	Intron (ENST00000512215.5/5530, intron 1 of 7)	MIR1255A
Peak_29066	chr7	28685219	28685595	-2.13992	0.000696632	Promoter (<=1kb)	CREB5
Peak_29375	chr2	160427996	160428285	-2.13845	0.000632019	Intron (ENST00000474820.5/5937, intron 2 of 15)	RBMS1
Peak_3662	chr9	122902988	122905851	-2.12591	2.27211e-08	Promoter (<=1kb)	RC3H2
Peak_22248	chr1	234962559	234963022	-2.12586	0.000145242	Promoter (<=1kb)	LOC101927851
Peak_23441	chr11	66115492	66115861	-2.12419	0.000331899	Intron (ENST00000320580.9/55690, intron 1 of 23)	PACS1
Peak_26911	chr2	111698902	111699378	-2.12222	0.000281354	Promoter (<=1kb)	MIR4435-2HG
Peak_9104	chr4	105713927	105714653	-2.11739	0.000298903	Promoter (1-2kb)	GSTCD
Peak_22592	chr4	94520080	94520630	-2.11712	5.01638e-06	Intron (ENST00000318007.9/10611, intron 2 of 9)	PDLIM5
Peak_29148	chr4	16952480	16952952	-2.11689	0.00240298	Distal Intergenic	LDB2
Peak_24397	chr5	131747412	131747969	-2.10645	8.52365e-05	Intron (ENST00000514667.1/51735, intron 1 of 28)	FNIP1
Peak_22530	chr3	181265907	181266400	-2.10175	0.0294748	Intron (ENST00000626948.2/347689, intron 4 of 6)	SOX2-OT
Peak_31480	chr4	81505601	81506048	-2.09556	0.000567015	Intron (ENST00000638048.1/153020, intron 4 of 16)	RASGEF1B
Peak_11666	chr17	47650609	47651512	-2.09487	0.0421712	Promoter (<=1kb)	KPNB1
Peak_30580	chr4	915195	915939	-2.09482	1.00534e-07	Promoter (<=1kb)	GAK
Peak_25784	chr6	105880014	105880636	-2.09374	0.00502511	Intron (ENST00000644129.1/105377923, intron 2 of 3)	LOC105377923
Peak_34300	chr20	12870452	12870753	-2.08711	0.0284928	Intron (ENST00000456265.1/101929486, intron 10 of 11)	LOC105372535
Peak_31654	chr13	67224811	67225147	-2.08181	0.0316559	3' UTR	PCDH9
Peak_28508	chr12	93593627	93593809	-2.07142	0.0178566	Distal Intergenic	SOCS2
Peak_17309	chr7	94160942	94161418	-2.06684	0.0157827	Distal Intergenic	LOC107986820
Peak_16905	chr9	13568710	13569416	-2.06179	0.00220097	Intron (ENST00000664438.1/105375977, intron 2 of 2)	LINC01235
Peak_28775	chr12	116559567	116559829	-2.05378	0.000312886	Promoter (<=1kb)	MAP1LC3B2
Peak_50353	chr6	38443504	38443665	-2.05303	0.000129835	Intron (ENST00000314100.10/114781, intron 5 of 9)	BTBD9-AS1
Peak_24698	chr11	70824901	70825176	-2.04722	0.00319349	Promoter (1-2kb)	SHANK2
Peak_24412	chr18	7572702	7573017	-2.043	0.015177	Intron (ENST00000332175.12/5797, intron 1 of 30)	PTPRM
Peak_24659	chr1	55217717	55218027	-2.04256	0.0150954	Promoter (<=1kb)	MIR4422HG
Peak_19187	chr17	35063463	35063767	-2.037	0.0139846	Promoter (<=1kb)	RFFL
Peak_25303	chr7	135971018	135971622	-2.03321	0.00468708	Intron (ENST00000393085.4/767558, intron 1 of 3)	LUZP6
Peak_2799	chr21	33323909	33326056	-2.03084	0.0161575	Promoter (<=1kb)	IFNAR1
Peak_23317	chr3	39250311	39250607	-2.02697	0.0476974	Distal Intergenic	LOC102724104
Peak_17725	chr21	16264134	16264805	-2.02649	0.000260429	Intron (ENST00000635845.1/388815, intron 4 of 5)	MIR99AHG
Peak_11773	chr7	24653236	24654043	-2.01835	0.00265821	Intron (ENST00000409761.5/51678, intron 4 of 10)	PALS2
Peak_17149	chr19	2553108	2553398	-2.01625	0.00705426	Intron (ENST00000382159.8/2788, intron 3 of 4)	GADD45B
Peak_25507	chr7	111987368	111987723	-2.014	0.00552501	Intron (ENST00000428084.6/9732, intron 6 of 52)	DOCK4
Peak_20144	chr2	68362222	68362692	-2.01152	8.25687e-05	Exon (ENST00000366218.2/101927723, exon 2 of 2)	PLEK
Peak_44108	chr5	95406551	95406920	-2.01006	0.0175285	Intron (ENST00000283357.10/153643, intron 3 of 9)	FAM81B
Peak_18179	chr15	83365240	83366025	-2.00892	0.0108715	Intron (ENST00000565495.1/ENST00000565495.1, intron 1 of 1)	BNC1
Peak_21191	chr2	72295373	72295932	-2.00769	0.011796	Intron (ENST00000272427.11/23233, intron 20 of 21)	EXOC6B
Peak_18963	chr12	100447205	100447652	-2.00663	0.000181618	Distal Intergenic	NR1H4
Peak_34509	chr17	3640051	3640278	-2.0049	0.000170967	Promoter (<=1kb)	CTNS
Peak_29670	chr1	202615777	202616112	-2.00217	0.00795605	Intron (ENST00000367267.5/127833, intron 1 of 8)	SYT2
Peak_7475	chr18	25352401	25353630	-2.00123	4.78816e-05	Promoter (<=1kb)	ZNF521
Peak_40643	chr15	58331782	58332244	-1.99771	0.0203933	Intron (ENST00000558239.5/8854, intron 2 of 3)	ALDH1A2
Peak_33758	chr8	67968886	67969143	-1.99512	0.023676	Intron (ENST00000288368.5/80243, intron 1 of 39)	PREX2
Peak_32948	chr22	19766823	19767175	-1.98929	0.0130933	Promoter (1-2kb)	TBX1
Peak_18125	chr8	21959766	21960495	-1.98872	3.94216e-07	Intron (ENST00000252512.14/23039, intron 1 of 27)	XPO7
Peak_19042	chr1	169309217	169309935	-1.98856	0.0051856	Promoter (<=1kb)	NME7
Peak_24347	chr17	75338392	75339042	-1.9878	8.84442e-08	Exon (ENST00000413334.1/ENST00000413334.1, exon 1 of 1)	GRB2
Peak_32142	chr10	4131385	4131686	-1.98511	0.0174611	Distal Intergenic	LOC101927964
Peak_25699	chr2	204967424	204967952	-1.98029	3.80742e-05	Intron (ENST00000406610.7/117583, intron 3 of 22)	PARD3B
Peak_20063	chr11	66727193	66727550	-1.97786	0.0275636	Promoter (1-2kb)	SPTBN2
Peak_27400	chr12	12010349	12010825	-1.97443	0.000396504	Distal Intergenic	BCL2L14
Peak_25652	chr19	3133046	3133394	-1.96924	4.07279e-05	Distal Intergenic	GNA15
Peak_17311	chr5	141382605	141383247	-1.9689	0.0489789	Promoter (<=1kb)	PCDHGA7
Peak_25500	chr5	126353960	126354413	-1.96632	0.00629338	Intron (ENST00000651847.1/ENST00000651847.1, intron 1 of 15)	GRAMD2B
Peak_36204	chr2	109335691	109335911	-1.96479	0.000170967	Intron (ENST00000309415.8/344558, intron 1 of 9)	MIR4266
Peak_847	chr2	60553899	60556263	-1.96376	0.00406295	Promoter (<=1kb)	BCL11A
Peak_19028	chr5	140711331	140711665	-1.9624	0.00905541	Promoter (<=1kb)	VTRNA1-1
Peak_12899	chr12	54390688	54391647	-1.96021	8.63463e-06	Promoter (<=1kb)	ZNF385A
Peak_27169	chr10	130301909	130302148	-1.95981	0.012397	Intron (ENST00000648275.1/107984002, intron 1 of 1)	LINC02646
Peak_26782	chr1	184456134	184456334	-1.95632	0.0416155	Intron (ENST00000235307.7/81563, intron 1 of 5)	C1orf21
Peak_27267	chr9	132546161	132546763	-1.95299	0.0042622	Intron (ENST00000393216.3/389799, intron 5 of 5)	BARHL1
Peak_40560	chr14	20780987	20781301	-1.94976	0.0162153	Promoter (<=1kb)	RNASE6
Peak_22238	chr9	20377744	20378456	-1.94939	0.0308551	Intron (ENST00000380338.9/4300, intron 5 of 10)	MLLT3
Peak_21510	chr10	64112787	64113217	-1.94622	0.0424719	Intron (ENST00000654191.1/ENST00000654191.1, intron 3 of 5)	LOC105378333
Peak_22195	chr5	32725748	32726722	-1.93751	0.00473278	Intron (ENST00000509104.5/4883, intron 2 of 5)	NPR3
Peak_14359	chr19	48322223	48322758	-1.93744	0.00382848	Promoter (<=1kb)	ODAD1
Peak_38229	chr2	112001426	112001874	-1.93663	0.00190552	Intron (ENST00000295408.9/10461, intron 11 of 18)	MERTK
Peak_28878	chr3	173548058	173548587	-1.93367	0.00739651	Intron (ENST00000423427.1/22871, intron 1 of 1)	NLGN1
Peak_26619	chr12	85867073	85867257	-1.93302	0.0132344	Distal Intergenic	NTS
Peak_7187	chr12	4268366	4269220	-1.92834	0.017306	Promoter (<=1kb)	CCND2
Peak_40636	chr3	65759121	65759394	-1.91677	0.00526713	Intron (ENST00000330909.12/9223, intron 1 of 24)	MAGI1-AS1
Peak_30513	chr2	230124861	230125140	-1.91378	0.000353839	Promoter (<=1kb)	LOC107985997
Peak_20155	chr11	30560355	30560822	-1.9079	8.63463e-06	Intron (ENST00000448418.6/744, intron 2 of 6)	MPPED2-AS1
Peak_8282	chr6	26321644	26322797	-1.90735	0.000541825	Exon (ENST00000404612.1/ENST00000404612.1, exon 1 of 1)	LOC101928743
Peak_1863	chr2	42359305	42361540	-1.90696	0.000106548	Promoter (<=1kb)	COX7A2L
Peak_39917	chr1	101262602	101263058	-1.90624	0.0052957	Distal Intergenic	S1PR1
Peak_28580	chr2	237678181	237678376	-1.9059	0.00136776	Intron (ENST00000308482.14/9208, intron 1 of 23)	LRRFIP1
Peak_25475	chr9	3397883	3398322	-1.90494	0.0276769	Intron (ENST00000382004.7/5991, intron 2 of 17)	RFX3
Peak_30643	chr2	122660901	122661697	-1.90286	0.000986061	Intron (ENST00000657880.1/105373595, intron 4 of 8)	LOC105373593
Peak_13518	chr17	35540887	35541284	-1.90278	0.0133841	Distal Intergenic	SLFN12L
Peak_6976	chr12	45990877	45992622	-1.8987	0.0274997	Promoter (<=1kb)	SCAF11
Peak_31065	chr16	50747101	50747529	-1.89859	5.09125e-06	Intron (ENST00000569418.5/1540, intron 2 of 17)	CYLD
Peak_24290	chr1	165424258	165424550	-1.89594	0.00544688	Promoter (<=1kb)	RXRG
Peak_23541	chr6	126171027	126171496	-1.89575	0.0320731	Intron (ENST00000648977.1/60487, intron 21 of 22)	LOC101928096
Peak_23406	chr17	27473958	27474424	-1.89548	0.00382848	Promoter (1-2kb)	KSR1
Peak_20712	chr13	74575909	74576230	-1.89506	0.0414919	Distal Intergenic	LINC00347
Peak_37679	chr3	23829821	23830179	-1.89271	0.00197211	Intron (ENST00000306627.8/7324, intron 3 of 5)	UBE2E1
Peak_15356	chr16	84726233	84727217	-1.89071	4.76163e-05	Intron (ENST00000562743.5/9100, intron 1 of 4)	USP10
Peak_20988	chr3	133572569	133573243	-1.88999	0.00349325	Promoter (<=1kb)	CDV3
Peak_29448	chr17	75783276	75783466	-1.87537	0.0337784	Promoter (1-2kb)	MIR4738
Peak_28498	chr6	52377740	52378009	-1.8753	0.0067418	Intron (ENST00000512121.1/85315, intron 1 of 1)	PAQR8
Peak_31596	chr13	108915282	108915727	-1.87476	0.0182028	Intron (ENST00000356711.7/23026, intron 16 of 34)	MYO16
Peak_35079	chr7	100041041	100041501	-1.86519	0.00093929	3' UTR	ZSCAN21
Peak_19149	chr13	62512371	62512704	-1.8635	0.0259078	Distal Intergenic	LOC105370232
Peak_46424	chr14	72128636	72128930	-1.86349	0.00739651	Intron (ENST00000553525.6/9628, intron 2 of 17)	RGS6
Peak_25774	chr2	191052055	191052260	-1.86338	0.0149267	Intron (ENST00000658263.1/ENST00000658263.1, intron 1 of 1)	STAT4
Peak_18094	chr5	172174937	172176023	-1.86224	6.07184e-05	Intron (ENST00000176763.10/6793, intron 1 of 18)	STK10
Peak_25421	chr6	10147178	10147595	-1.86224	0.0108715	Intron (ENST00000481704.1/266553, intron 2 of 2)	OFCC1
Peak_28633	chr12	71551524	71551750	-1.86166	0.0219773	Intron (ENST00000266674.10/8549, intron 4 of 17)	LGR5
Peak_57021	chr1	111844693	111845032	-1.8605	0.0369346	Intron (ENST00000369697.5/3752, intron 1 of 5)	KCND3-IT1
Peak_24570	chr1	107897316	107897914	-1.85912	0.00817752	Promoter (<=1kb)	MIR7852
Peak_29209	chr2	69582214	69582466	-1.85797	0.00362284	Intron (ENST00000606389.7/22848, intron 1 of 16)	AAK1
Peak_23215	chr3	196631890	196632522	-1.8561	0.00406295	Promoter (<=1kb)	LINC01063
Peak_12151	chr1	173206788	173207766	-1.85603	1.97492e-06	Promoter (<=1kb)	TNFSF4
Peak_38717	chr19	35436325	35436731	-1.85579	0.0194325	Promoter (1-2kb)	LOC101927522
Peak_28262	chr9	749503	749730	-1.8545	0.00172493	Distal Intergenic	KANK1
Peak_20112	chr3	143977377	143977953	-1.85202	0.000632157	Intron (ENST00000315691.8/205428, intron 1 of 2)	DIPK2A
Peak_31933	chr12	49621683	49621906	-1.84868	0.0381569	Promoter (1-2kb)	PRPF40B
Peak_35159	chr2	226423599	226423970	-1.84591	0.00693099	Distal Intergenic	MIR5702
Peak_39999	chr2	177352628	177353314	-1.84517	3.47989e-05	Intron (ENST00000464747.5/4780, intron 1 of 7)	LOC100130691
Peak_25496	chr16	11361751	11362071	-1.84195	0.00264123	Intron (ENST00000649869.1/105371082, intron 1 of 2)	LOC105371082
Peak_35082	chr7	94395347	94395569	-1.83772	0.0125148	Promoter (<=1kb)	COL1A2-AS1
Peak_43987	chr17	64449208	64449450	-1.83714	0.00544688	Promoter (<=1kb)	MILR1
Peak_21459	chr17	29722392	29722934	-1.83685	0.000263628	Intron (ENST00000269033.7/85464, intron 2 of 14)	SSH2
Peak_22423	chr20	31675151	31675894	-1.8345	0.00932419	Intron (ENST00000376062.6/598, intron 1 of 1)	BCL2L1-AS1
Peak_19721	chr13	24203837	24204360	-1.83286	0.000250169	Intron (ENST00000382141.4/221178, intron 3 of 15)	SPATA13
Peak_32055	chr7	7867900	7868382	-1.82547	0.000292582	Exon (ENST00000638342.1/729852, exon 4 of 5)	GLCCI1-DT
Peak_26305	chr4	73181299	73181513	-1.82532	0.00108987	Intron (ENST00000358602.9/26057, intron 1 of 33)	ANKRD17
Peak_8638	chr4	25861353	25862889	-1.82343	0.000303227	Promoter (<=1kb)	SMIM20
Peak_26509	chr8	85959174	85959373	-1.82238	0.0264379	Distal Intergenic	LOC107986954
Peak_16550	chr9	125646587	125647262	-1.81667	0.000990352	Intron (ENST00000373511.6/79109, intron 4 of 10)	MAPKAP1
Peak_35347	chr11	129950630	129951000	-1.81661	0.000863153	Intron (ENST00000358825.9/56980, intron 4 of 21)	PRDM10
Peak_35694	chr6	164396608	164396968	-1.8155	0.00396032	Distal Intergenic	MEAT6
Peak_27769	chr17	64777261	64777678	-1.81453	0.000564369	Intron (ENST00000578492.5/109286553, intron 2 of 11)	MIR6080
Peak_34247	chr12	5402195	5402821	-1.81378	0.0080066	Exon (ENST00000538430.1/105369618, exon 2 of 5)	LOC105369618
Peak_23236	chr3	123618434	123618878	-1.81228	4.60765e-05	Promoter (1-2kb)	MYLK
Peak_22193	chr2	151637228	151637831	-1.81043	0.00042765	Intron (ENST00000409198.5/4703, intron 62 of 149)	NEB
Peak_24308	chr11	68282146	68282396	-1.80852	0.00756718	Intron (ENST00000668632.1/105369363, intron 1 of 2)	LOC105369363
Peak_26833	chr2	27081431	27081866	-1.80788	0.0123154	Promoter (1-2kb)	EMILIN1
Peak_26747	chr4	184534855	184535094	-1.80775	0.000791974	Intron (ENST00000605270.6/105377585, intron 1 of 2)	LINC02427
Peak_18674	chr11	72589892	72590370	-1.80416	0.000355336	Promoter (<=1kb)	PDE2A
Peak_20174	chr14	54730046	54730698	-1.8034	8.50124e-05	Intron (ENST00000554335.6/23034, intron 3 of 12)	SAMD4A
Peak_28415	chr2	98082114	98082324	-1.8028	0.0415734	Distal Intergenic	VWA3B
Peak_7594	chr16	53207866	53211911	-1.80166	7.15639e-08	Promoter (<=1kb)	CHD9
Peak_31711	chr13	67222827	67223405	-1.79849	0.000703903	3' UTR	PCDH9
Peak_27133	chr6	83511993	83512391	-1.79828	0.0492609	Promoter (<=1kb)	PRSS35
Peak_23360	chr9	71901806	71902291	-1.79793	9.81625e-05	Intron (ENST00000377041.6/51104, intron 1 of 4)	ABHD17B
Peak_21611	chr9	20242646	20243417	-1.79769	0.00115236	Distal Intergenic	MLLT3
Peak_31160	chr17	55271077	55271384	-1.79721	0.00140749	Intron (ENST00000226067.10/3131, intron 2 of 3)	HLF
Peak_27741	chr17	30922238	30922570	-1.79467	0.0463877	Promoter (<=1kb)	ADAP2
Peak_8322	chr7	7761487	7762975	-1.79438	4.03726e-06	Intron (ENST00000463725.5/729852, intron 3 of 4)	UMAD1
Peak_7305	chr1	224434649	224435813	-1.79377	0.0105224	Promoter (<=1kb)	CNIH3
Peak_14827	chr5	55173408	55173958	-1.79244	0.0405445	Promoter (<=1kb)	CDC20B
Peak_32183	chr12	70318053	70318241	-1.79131	8.25687e-05	Promoter (<=1kb)	CNOT2
Peak_55034	chr17	59668846	59669112	-1.78924	0.00425646	Promoter (1-2kb)	CLTC
Peak_25616	chr2	201260036	201260438	-1.78449	0.0056195	Promoter (<=1kb)	CASP8
Peak_25087	chr1	28417033	28417939	-1.78364	0.000577145	Intron (ENST00000633371.1/65979, intron 2 of 4)	PHACTR4
Peak_25411	chr9	34123388	34123853	-1.78132	2.13858e-05	Promoter (1-2kb)	DCAF12
Peak_29476	chr4	20418629	20419287	-1.77716	0.0200429	Intron (ENST00000504154.6/9353, intron 4 of 36)	SLIT2-IT1
Peak_21492	chr12	27587886	27588601	-1.77578	0.000164487	Intron (ENST00000538433.5/8496, intron 2 of 4)	PPFIBP1
Peak_2275	chr3	45688161	45689138	-1.77433	0.0456766	Promoter (<=1kb)	SACM1L
Peak_36265	chr1	168342926	168343135	-1.77359	0.0169947	Intron (ENST00000636624.1/ENST00000636624.1, intron 1 of 3)	MIR557
Peak_21649	chr13	19960437	19960660	-1.77196	0.0131799	Promoter (<=1kb)	ZMYM2
Peak_31448	chr1	231036323	231036497	-1.7719	0.000422689	Intron (ENST00000366654.5/375061, intron 1 of 1)	FAM89A
Peak_35398	chr6	109304299	109304523	-1.7681	0.0211376	Intron (ENST00000368966.10/221262, intron 29 of 45)	CCDC162P
Peak_25417	chr13	48492491	48492870	-1.76802	0.00550963	Promoter (<=1kb)	RCBTB2
Peak_35521	chr2	207150286	207150639	-1.76696	5.32763e-05	Intron (ENST00000309446.11/8609, intron 1 of 3)	KLF7
Peak_13935	chr17	74532391	74533325	-1.76636	0.00025882	Promoter (<=1kb)	CD300LB
Peak_29644	chr7	28330199	28330404	-1.76535	0.0296536	Intron (ENST00000396299.6/9586, intron 1 of 9)	CREB5
Peak_30842	chr9	107760750	107761207	-1.76517	5.99918e-05	Distal Intergenic	KLF4
Peak_33564	chr18	54852573	54853188	-1.76328	0.0123102	Intron (ENST00000586570.5/5874, intron 2 of 4)	RAB27B
Peak_24568	chr17	31309051	31309577	-1.76323	0.00403391	Intron (ENST00000356175.7/4763, intron 35 of 56)	EVI2B
Peak_23533	chr13	41006227	41006798	-1.76127	0.000111554	Intron (ENST00000239882.7/1997, intron 1 of 8)	ELF1
Peak_14660	chr14	22070213	22071559	-1.7602	0.00215994	5' UTR	LOC105370401
Peak_23097	chr9	79812553	79813220	-1.76017	0.000400278	Distal Intergenic	LOC105376101
Peak_15671	chr18	7822510	7822941	-1.758	0.00630476	Intron (ENST00000332175.12/5797, intron 2 of 30)	PTPRM
Peak_36001	chr4	181971327	181971759	-1.75225	0.0166772	Intron (ENST00000509012.5/90768, intron 3 of 4)	TEMN3-AS1
Peak_26496	chr18	64270228	64270699	-1.75142	9.63281e-07	Intron (ENST00000589376.1/284294, intron 3 of 9)	LINC01538
Peak_27351	chr6	8731855	8732328	-1.75103	0.0361242	Intron (ENST00000644718.1/105374910, intron 7 of 8)	LOC100506207
Peak_38139	chr20	53642699	53643447	-1.75031	0.0148494	Distal Intergenic	ZNF217
Peak_15913	chr22	40384924	40385661	-1.74995	1.3097e-07	Intron (ENST00000636714.1/158, intron 13 of 13)	SGSM3-AS1
Peak_24083	chr6	142384501	142384884	-1.74845	0.00286022	Intron (ENST00000230173.10/57211, intron 6 of 25)	ADGRG6
Peak_46453	chr5	157108911	157109142	-1.74833	0.0140994	Promoter (<=1kb)	HAVCR2
Peak_18439	chr8	79615236	79615637	-1.74733	0.0187118	Intron (ENST00000220876.12/11075, intron 1 of 4)	STMN2
Peak_20662	chr9	131733465	131733941	-1.74609	7.21875e-05	Intron (ENST00000372189.7/2889, intron 1 of 23)	RAPGEF1
Peak_37835	chr3	177145235	177145596	-1.74565	8.18127e-05	Intron (ENST00000457928.7/79718, intron 1 of 15)	TBL1XR1
Peak_22341	chr2	196459471	196459809	-1.74077	0.0240601	Intron (ENST00000260983.8/57520, intron 1 of 28)	HECW2
Peak_14483	chr13	21075020	21075856	-1.73919	0.00378651	Distal Intergenic	LATS2
Peak_17302	chr2	206800645	206801101	-1.73723	0.0360852	Exon (ENST00000658889.1/130749, exon 1 of 5)	CPO
Peak_2457	chr3	179346798	179348745	-1.73671	0.000758491	Promoter (<=1kb)	MFN1
Peak_16592	chr11	75873199	75874332	-1.73641	2.73912e-06	Intron (ENST00000356136.8/7405, intron 3 of 14)	UVRAG
Peak_21019	chr1	92459612	92460300	-1.73632	0.00220097	Distal Intergenic	GFI1
Peak_36090	chr12	51972385	51972966	-1.73521	0.001186	Intron (ENST00000257963.9/91, intron 1 of 8)	ACVR1B
Peak_25337	chr9	72871771	72872052	-1.73443	0.00168477	Promoter (1-2kb)	LINC01474
Peak_7816	chr2	159514853	159517076	-1.73344	0.000921988	Promoter (<=1kb)	BAZ2B
Peak_30710	chr10	22001449	22001661	-1.73175	0.0163309	Promoter (1-2kb)	DNAJC1
Peak_20717	chr16	58755855	58756579	-1.73154	0.00415209	Exon (ENST00000568134.6/107984867, exon 3 of 4)	LOC107984867
Peak_25648	chr17	6661034	6661331	-1.73133	0.0435226	Exon (ENST00000621574.1/100652883, exon 7 of 7)	ALOX15P1
Peak_12847	chr7	54773844	54774375	-1.72943	0.0034069	Intron (ENST00000655633.1/100996654, intron 1 of 2)	SEC61G
Peak_26550	chr11	34988596	34988827	-1.72893	0.00954549	Intron (ENST00000448838.8/8050, intron 9 of 10)	PDHX
Peak_10778	chr22	37639481	37640302	-1.72799	0.00279543	Promoter (<=1kb)	SH3BP1
Peak_3114	chr1	198933528	198937880	-1.7257	6.58523e-06	Promoter (<=1kb)	MIR181A1HG
Peak_16565	chr2	5725794	5726561	-1.72565	0.0472872	Promoter (<=1kb)	LOC112268411
Peak_6905	chr15	75758203	75759394	-1.72547	0.00131086	Promoter (<=1kb)	LOC101929408
Peak_33903	chr12	92133918	92134141	-1.7252	0.0419228	Intron (ENST00000551843.5/256021, intron 1 of 5)	LINC01619
Peak_28585	chr8	101501210	101501559	-1.72486	0.0488946	Intron (ENST00000646743.1/79977, intron 1 of 15)	GRHL2
Peak_13261	chr5	14010894	14012231	-1.72397	0.000276125	Promoter (<=1kb)	DNAH5
Peak_27135	chr7	135508235	135508500	-1.72391	0.00850701	Promoter (1-2kb)	CNOT4
Peak_20356	chr1	19477176	19478048	-1.72386	3.73228e-06	Intron (ENST00000264202.8/832, intron 1 of 8)	MICOS10
Peak_14186	chr5	130836635	130837198	-1.72162	0.0268671	Intron (ENST00000661392.1/107986449, intron 1 of 5)	LOC107986449
Peak_28646	chr5	131515180	131515548	-1.72022	0.00311647	Intron (ENST00000509018.6/51735, intron 7 of 27)	RAPGEF6
Peak_24739	chr16	1342619	1343021	-1.71973	0.0231289	Promoter (<=1kb)	BAIAP3
Peak_22457	chr6	165634005	165634665	-1.71877	0.00470702	Intron (ENST00000366882.6/10846, intron 1 of 21)	PDE10A
Peak_4573	chr6	96924578	96925587	-1.71795	0.000860797	Promoter (<=1kb)	KLHL32
Peak_22400	chr5	95027584	95028010	-1.71513	0.000545095	Intron (ENST00000515393.5/79772, intron 1 of 22)	MCTP1
Peak_18576	chr13	65260652	65261557	-1.71237	0.045029	Distal Intergenic	LINC01052
Peak_40302	chr10	298494	298685	-1.70969	0.000915068	Intron (ENST00000381496.7/22982, intron 31 of 35)	DIP2C
Peak_29474	chr4	155638988	155639376	-1.70877	0.017598	Distal Intergenic	GUCY1A1
Peak_21965	chr4	13074797	13075205	-1.70608	0.0151635	Distal Intergenic	RAB28
Peak_19153	chr1	154999664	155000609	-1.70525	0.0316006	Distal Intergenic	ZBTB7B
Peak_34546	chr10	33661727	33662309	-1.70311	0.00015037	Distal Intergenic	LINC02628
Peak_28277	chr1	112337161	112337475	-1.69911	0.00348384	Intron (ENST00000427290.1/105378909, intron 1 of 1)	LINC02884
Peak_33540	chr11	67579504	67579903	-1.69742	0.0222925	Distal Intergenic	GSTP1
Peak_35372	chr11	40291642	40292050	-1.6952	0.0101686	Promoter (1-2kb)	LRRC4C
Peak_29586	chr2	197293344	197293825	-1.68995	0.00233414	Intron (ENST00000282272.15/91526, intron 1 of 27)	ANKRD44-IT1
Peak_16847	chr7	26101003	26102095	-1.6882	0.000771018	Distal Intergenic	NFE2L3
Peak_5131	chr11	118436459	118439999	-1.68749	0.00393443	Promoter (<=1kb)	KMT2A
Peak_28341	chr8	55919320	55919793	-1.68345	0.000990352	Intron (ENST00000520220.6/4067, intron 1 of 12)	SNORA1B
Peak_20242	chr8	18747622	18748033	-1.6825	0.0489458	Intron (ENST00000440756.4/23362, intron 9 of 15)	PSD3
Peak_18539	chr6	144582991	144583731	-1.68061	4.26619e-05	Promoter (<=1kb)	UTRN
Peak_19113	chr6	12483609	12484075	-1.68023	0.000403806	Distal Intergenic	LINC02530
Peak_7054	chr14	39432637	39434000	-1.67748	0.00320472	Promoter (<=1kb)	LOC105370461
Peak_10251	chr12	132559993	132561394	-1.67621	0.000405606	Promoter (<=1kb)	FBRSL1
Peak_19011	chr9	123002794	123003272	-1.67598	0.0123517	Intron (ENST00000456584.5/23637, intron 11 of 27)	RABGAP1
Peak_21399	chr1	100463856	100464143	-1.67197	0.0125458	Intron (ENST00000644844.1/8556, intron 9 of 15)	CDC14A
Peak_36252	chr9	3398371	3398733	-1.66864	0.0229526	Intron (ENST00000382004.7/5991, intron 2 of 17)	RFX3
Peak_24189	chr1	12344363	12345574	-1.6684	4.03726e-06	Promoter (<=1kb)	VPS13D
Peak_20341	chr7	26369757	26370523	-1.66738	0.000848068	Promoter (<=1kb)	SNX10
Peak_11217	chr12	124993675	124995514	-1.66605	4.22779e-07	Promoter (<=1kb)	BRI3BP
Peak_23287	chr2	237617242	237617486	-1.66509	0.00575407	Intron (ENST00000417947.1/ENST00000417947.1, intron 1 of 1)	LRRFIP1
Peak_22467	chr3	169354235	169355365	-1.66456	0.0226595	Intron (ENST00000651503.2/2122, intron 2 of 16)	MECOM
Peak_45689	chr11	34998128	34998327	-1.66455	0.0228653	Intron (ENST00000477173.3/8050, intron 2 of 2)	PDHX
Peak_17785	chr21	29195958	29196449	-1.66384	0.00355071	Promoter (1-2kb)	BACH1
Peak_31832	chr5	33737082	33737336	-1.6635	0.0144368	Intron (ENST00000504830.6/81792, intron 3 of 23)	ADAMTS12
Peak_13391	chr3	93841509	93841881	-1.66248	0.00188299	Distal Intergenic	PROS1
Peak_28530	chr5	14676299	14676730	-1.6623	0.000129141	Intron (ENST00000503023.1/90268, intron 1 of 4)	OTULIN
Peak_13928	chr9	125904400	125904999	-1.66206	0.0014665	Intron (ENST00000342287.9/5090, intron 2 of 7)	PBX3
Peak_26670	chr10	26482006	26482409	-1.6617	0.0134366	Intron (ENST00000376236.9/54518, intron 2 of 14)	APBB1IP
Peak_28157	chr5	75558990	75559508	-1.66088	0.0174037	Intron (ENST00000241436.8/51426, intron 3 of 14)	POLK
Peak_28295	chr12	1533461	1534284	-1.66055	9.60396e-05	Intron (ENST00000539198.5/81029, intron 1 of 3)	WNT5B
Peak_25140	chr17	45307384	45307838	-1.66038	0.000269089	Intron (ENST00000344686.8/9020, intron 1 of 15)	MAP3K14
Peak_26321	chr5	172701493	172701939	-1.65997	0.00115749	Distal Intergenic	LOC107986479
Peak_53151	chr5	125205826	125206166	-1.65948	0.00276537	Intron (ENST00000647105.1/101927421, intron 2 of 6)	LOC101927421
Peak_28659	chr1	28927740	28928080	-1.65941	0.0214775	Intron (ENST00000647103.1/2035, intron 1 of 17)	EPB41
Peak_23407	chr17	50027051	50027757	-1.65886	0.00756718	Distal Intergenic	PICART1
Peak_16949	chr9	99118965	99119650	-1.65701	0.00012941	Intron (ENST00000547314.5/7046, intron 1 of 2)	TGFBR1
Peak_17025	chr9	130045135	130045967	-1.65681	0.00289457	Promoter (1-2kb)	FNBP1
Peak_258	chr4	145937685	145939423	-1.65485	0.000758491	Promoter (<=1kb)	ZNF827
Peak_23841	chr6	151681645	151682066	-1.65281	0.000418467	Intron (ENST00000473497.5/2099, intron 1 of 2)	ESR1
Peak_14565	chr4	107799911	107800336	-1.65245	0.00630476	Distal Intergenic	SGMS2
Peak_21437	chr9	124758087	124758785	-1.65046	0.0371134	Intron (ENST00000487099.7/2649, intron 1 of 9)	LOC107987126
Peak_34946	chr8	120857353	120858041	-1.65025	0.000589196	Distal Intergenic	SNTB1
Peak_22194	chr10	13718350	13718837	-1.64831	0.000104566	Intron (ENST00000357447.7/55691, intron 12 of 24)	LOC105376426
Peak_19716	chr7	16563202	16563667	-1.6477	9.11108e-06	Intron (ENST00000401542.3/100506049, intron 5 of 8)	SOSTDC1
Peak_25073	chr4	123257703	123258024	-1.64748	0.00600993	Intron (ENST00000675612.1/166378, intron 16 of 16)	SPRY1
Peak_34139	chr3	57998627	57998840	-1.64739	0.00254266	Distal Intergenic	FLNB
Peak_26597	chr6	118187156	118187765	-1.64689	0.0472582	Intron (ENST00000360388.9/222553, intron 2 of 7)	SLC35F1
Peak_1346	chr12	11649919	11653980	-1.64574	1.26613e-08	Promoter (<=1kb)	ETV6
Peak_2431	chr12	54497590	54498906	-1.6452	0.00179587	Promoter (<=1kb)	NCKAP1L
Peak_4408	chr2	224585673	224586864	-1.64026	0.00948342	Promoter (<=1kb)	CUL3
Peak_23279	chr19	33077966	33078382	-1.63924	0.00403311	Distal Intergenic	GPATCH1
Peak_3345	chr6	73652525	73655374	-1.63792	6.29933e-05	Promoter (<=1kb)	SLC17A5
Peak_5961	chr4	73222430	73223205	-1.63753	0.041092	Promoter (<=1kb)	ANKRD17
Peak_16088	chr12	8180176	8180690	-1.63656	0.0410743	Promoter (<=1kb)	FAM66C
Peak_2192	chr6	135179926	135184882	-1.63311	4.47192e-05	Promoter (<=1kb)	MYB
Peak_20863	chr5	68240192	68240739	-1.63283	0.0107232	Promoter (<=1kb)	PIK3R1
Peak_1017	chr10	63264386	63269719	-1.63136	0.00888878	Promoter (<=1kb)	JMJD1C
Peak_25317	chr1	206575364	206575613	-1.63034	0.0211051	Intron (ENST00000579436.7/83593, intron 2 of 5)	RASSF5
Peak_35209	chr17	65029802	65030178	-1.63032	0.00051562	Intron (ENST00000439174.7/10672, intron 2 of 3)	GNA13
Peak_25344	chr12	104108649	104109314	-1.62921	0.000219212	Distal Intergenic	HCFC2
Peak_22354	chr1	26700805	26701003	-1.62712	0.0375239	Intron (ENST00000430799.7/8289, intron 1 of 19)	ARID1A
Peak_24594	chr3	122233218	122233788	-1.62632	0.00739651	Intron (ENST00000639785.2/846, intron 1 of 6)	CASR
Peak_20750	chr12	54216544	54217056	-1.62559	0.0202849	Distal Intergenic	MIR3198-2
Peak_16551	chr11	33893261	33894976	-1.62398	3.73228e-06	Promoter (1-2kb)	LMO2
Peak_25362	chr1	44048074	44048578	-1.62128	0.0126816	Promoter (<=1kb)	KLF17
Peak_9358	chr8	79767014	79767863	-1.62056	0.0174592	Promoter (<=1kb)	HEY1
Peak_2314	chr10	58384286	58386636	-1.62054	0.000631606	Promoter (<=1kb)	TFAM
Peak_26701	chr20	59016973	59017227	-1.62012	0.000533461	Distal Intergenic	TUBB1
Peak_24024	chr9	101485461	101485720	-1.61934	0.00729168	Promoter (1-2kb)	PGAP4
Peak_25631	chr1	178192726	178193075	-1.61897	0.00318034	Intron (ENST00000367649.8/9462, intron 1 of 17)	RASAL2
Peak_18182	chr7	26856036	26856863	-1.61829	0.0121594	Promoter (<=1kb)	SKAP2
Peak_20686	chr1	85091543	85092154	-1.61549	0.0298044	Intron (ENST00000370596.5/126820, intron 7 of 21)	DNAI3
Peak_24419	chr19	16367109	16367446	-1.61502	0.0142668	Intron (ENST00000602022.5/58513, intron 21 of 22)	EPS15L1
Peak_53352	chr16	85308725	85309041	-1.61182	0.00166581	Exon (ENST00000653746.1/107984830, exon 2 of 2)	MIR5093
Peak_21842	chr15	90660775	90661135	-1.61061	0.00171557	Promoter (<=1kb)	LINC01585
Peak_20838	chr13	50511845	50512814	-1.60918	2.10695e-05	Exon (ENST00000484606.1/10301, exon 2 of 2)	DLEU1-AS1
Peak_22122	chr5	39076960	39077674	-1.60873	0.00207892	Distal Intergenic	RICTOR
Peak_22286	chr3	69324649	69324937	-1.60808	0.00220095	Intron (ENST00000398540.8/23150, intron 1 of 22)	FRMD4B
Peak_25294	chr2	69582660	69583094	-1.60747	0.0256933	Intron (ENST00000606389.7/22848, intron 1 of 16)	AAK1
Peak_8562	chr9	112333963	112334844	-1.60572	0.0497118	Promoter (<=1kb)	PTBP3
Peak_22131	chr10	89163666	89164278	-1.60378	0.00689813	Distal Intergenic	CH25H
Peak_11553	chr15	76059008	76059765	-1.60314	0.0445791	Promoter (<=1kb)	NRG4
Peak_22500	chr10	74739139	74739500	-1.602	0.00260918	Distal Intergenic	KAT6B
Peak_33890	chr10	73956802	73957287	-1.60133	0.00289457	Distal Intergenic	C10orf55
Peak_19551	chr10	105837687	105838718	-1.59965	0.00117478	Distal Intergenic	LINC02627
Peak_12903	chr9	708164	709543	-1.59921	5.57733e-05	Promoter (1-2kb)	KANK1
Peak_35617	chr7	9938212	9938704	-1.5983	0.0499742	Intron (ENST00000663710.1/105375146, intron 1 of 4)	LOC105375146
Peak_1442	chr7	92829352	92836380	-1.59761	1.04508e-17	Promoter (<=1kb)	CDK6
Peak_28765	chr8	42265839	42266414	-1.59642	0.0119564	Exon (ENST00000518213.2/101929897, exon 2 of 4)	IKBKB-DT
Peak_20889	chr8	133498533	133499316	-1.59385	6.18993e-06	Promoter (<=1kb)	ST3GAL1
Peak_28440	chr18	32040779	32041041	-1.58834	0.00312807	Promoter (<=1kb)	RNF125
Peak_36897	chr19	23204179	23204366	-1.58763	0.0259997	Exon (ENST00000598402.1/ENST00000598402.1, exon 1 of 1)	ZNF724
Peak_35441	chr10	86413208	86413517	-1.58715	0.0143491	Distal Intergenic	WAPL
Peak_4957	chr6	27502210	27503750	-1.58626	0.00245555	Intron (ENST00000648816.1/ENST00000648816.1, intron 1 of 3)	LOC105375001
Peak_29769	chr11	64292183	64292778	-1.5851	0.0298509	Promoter (<=1kb)	KCNK4
Peak_37594	chr10	99870050	99870368	-1.58405	0.0116856	Distal Intergenic	DNMBP
Peak_16784	chr19	3478815	3479597	-1.57781	0.0343685	Promoter (<=1kb)	SMIM24
Peak_15306	chr4	39031935	39032461	-1.57747	0.0143965	Promoter (<=1kb)	TMEM156
Peak_15967	chr6	152462574	152463302	-1.57639	0.000385388	Promoter (1-2kb)	SYNE1
Peak_20191	chr7	1506716	1507188	-1.57417	0.0220306	Distal Intergenic	INTS1
Peak_49674	chr1	111622238	111622661	-1.57208	0.00396274	Intron (ENST00000356415.5/5906, intron 1 of 7)	RAP1A
Peak_33745	chr2	60796780	60796941	-1.57109	0.00681304	Intron (ENST00000496283.5/64895, intron 18 of 18)	PAPOLG
Peak_31059	chr1	181099615	181099924	-1.5702	0.000219212	Distal Intergenic	IER5
Peak_23492	chr3	156484180	156484797	-1.56946	0.0389448	Intron (ENST00000472028.5/7881, intron 8 of 8)	KCNAB1
Peak_15826	chr19	12937329	12938309	-1.56925	0.028236	Promoter (<=1kb)	CALR
Peak_23184	chr3	36876619	36876869	-1.56742	0.00194972	Intron (ENST00000645898.2/9881, intron 8 of 23)	TRANK1
Peak_21002	chr14	89303682	89304481	-1.56654	0.000460835	Intron (ENST00000345097.8/1112, intron 3 of 6)	LOC101928817
Peak_26518	chr2	237291357	237291937	-1.56633	0.0181258	Distal Intergenic	LOC105373953
Peak_6119	chr9	73132109	73133104	-1.56566	0.0202669	Distal Intergenic	ANXA1
Peak_32334	chr3	71586239	71586651	-1.5646	0.0108715	Exon (ENST00000604491.1/ENST00000604491.1, exon 1 of 1)	FOXP1
Peak_8256	chr12	75329740	75330596	-1.56203	0.0034069	Promoter (<=1kb)	CAPS2
Peak_10687	chr6	77367945	77369378	-1.56162	0.0496886	Distal Intergenic	HTR1B
Peak_3970	chr17	21126092	21128061	-1.56107	0.000368581	Promoter (<=1kb)	DHRS7B
Peak_7989	chr3	185363082	185364019	-1.55877	0.00500733	Promoter (<=1kb)	MAP3K13
Peak_3164	chr3	31532527	31537192	-1.55842	1.00534e-07	Promoter (<=1kb)	STT3B
Peak_29170	chr19	31339495	31339793	-1.55734	0.0152007	Intron (ENST00000651361.1/57616, intron 1 of 6)	TSHZ3-AS1
Peak_14632	chr6	8743152	8743759	-1.55685	0.0271924	Intron (ENST00000644718.1/105374910, intron 7 of 8)	LOC100506207
Peak_26727	chr7	92754811	92755161	-1.55599	0.00486282	Intron (ENST00000265734.8/1021, intron 3 of 7)	CDK6
Peak_211	chr12	12715433	12720409	-1.55292	1.47392e-05	Promoter (<=1kb)	CDKN1B
Peak_16972	chr10	16891472	16891814	-1.55167	0.0131555	Intron (ENST00000377833.10/8029, intron 54 of 66)	CUBN
Peak_18633	chr14	35285737	35286536	-1.55078	0.000351169	Intron (ENST00000557565.1/9692, intron 9 of 14)	PSMA6
Peak_15961	chr13	74288049	74289019	-1.54954	0.0015446	Promoter (<=1kb)	LOC105370259
Peak_30706	chr1	172746168	172746400	-1.54942	0.0436698	Distal Intergenic	FASLG
Peak_25169	chr7	90700992	90701341	-1.54781	0.0384668	Intron (ENST00000449528.5/5218, intron 5 of 7)	CDK14
Peak_13901	chr4	59818377	59819233	-1.54754	0.0295551	Distal Intergenic	LINC02429
Peak_14404	chr10	34809206	34809743	-1.54753	0.000592246	Intron (ENST00000545260.5/56288, intron 1 of 22)	PARD3
Peak_22365	chr13	67226818	67227124	-1.54455	0.00307559	Exon (ENST00000377865.7/5101, exon 2 of 5)	PCDH9
Peak_40216	chr6	2820022	2820456	-1.54425	0.000323354	Distal Intergenic	SERPINB1
Peak_47103	chr11	118316477	118316816	-1.54409	0.0156006	Distal Intergenic	CD3E
Peak_23385	chr11	127733882	127734313	-1.54375	0.0303552	Distal Intergenic	LINC02725
Peak_29236	chr5	91469209	91469759	-1.54358	0.00233414	Promoter (<=1kb)	LOC107986434
Peak_4529	chr7	87599317	87601449	-1.54125	0.00107324	Promoter (<=1kb)	ABCB1
Peak_11493	chr2	236928486	236929025	-1.5398	0.00624623	Intron (ENST00000662924.1/105373951, intron 2 of 2)	LOC93463
Peak_20434	chr13	113001291	113001920	-1.536	0.00124061	Promoter (<=1kb)	MCF2L
Peak_9992	chr7	47991648	47992435	-1.53396	0.000637717	Intron (ENST00000473723.5/256979, intron 3 of 5)	SUN3
Peak_31781	chr7	37421178	37421472	-1.53375	0.0164305	Intron (ENST00000310758.9/9844, intron 1 of 21)	ELMO1
Peak_13695	chr2	73284429	73285351	-1.53332	0.0047282	Promoter (<=1kb)	FBXO41
Peak_34491	chr1	246577210	246577552	-1.53216	0.00166581	Intron (ENST00000483271.1/163882, intron 1 of 7)	CNST
Peak_43990	chr17	68346375	68346815	-1.53142	0.012634	Promoter (<=1kb)	ARSG
Peak_1706	chr7	140924961	140925738	-1.5308	0.0169144	Promoter (<=1kb)	BRAF
Peak_12519	chr11	84719938	84721396	-1.53075	0.0137655	Promoter (<=1kb)	DLG2
Peak_26092	chr17	2852389	2852709	-1.53067	0.0131716	Intron (ENST00000637138.1/23108, intron 3 of 25)	RAP1GAP2
Peak_28812	chr7	150787567	150787885	-1.52996	0.00215994	Distal Intergenic	TMEM176B
Peak_35062	chr4	158810134	158810631	-1.52932	4.75134e-05	Intron (ENST00000264433.11/57600, intron 1 of 16)	FNIP2
Peak_15366	chr16	47779260	47780145	-1.52581	0.0245397	Intron (ENST00000565451.5/101927132, intron 1 of 2)	LINC02133
Peak_31860	chr6	159983199	159983577	-1.52517	0.0276769	Intron (ENST00000356956.6/3482, intron 1 of 47)	IGF2R
Peak_3098	chr12	55737954	55738996	-1.52512	0.0164171	Distal Intergenic	GDF11
Peak_23219	chr5	151150167	151150921	-1.52269	0.000219986	Promoter (<=1kb)	ANXA6
Peak_1980	chr1	93078403	93082158	-1.52258	0.000343557	Promoter (<=1kb)	MTF2
Peak_5745	chr2	64652112	64653896	-1.5222	0.0407432	Promoter (<=1kb)	SERTAD2
Peak_23985	chr10	4130980	4131312	-1.52216	0.00878377	Distal Intergenic	LOC101927964
Peak_25701	chr2	54422052	54422254	-1.52206	0.00948342	Distal Intergenic	SPTBN1
Peak_16055	chr4	89298922	89299686	-1.52194	0.0125912	Intron (ENST00000609438.2/285513, intron 1 of 1)	GPRIN3
Peak_48359	chr5	125485049	125485301	-1.51939	0.0146284	Intron (ENST00000647105.1/101927421, intron 4 of 6)	LINC02240
Peak_29398	chr7	37408521	37408778	-1.51917	0.0141931	Intron (ENST00000310758.9/9844, intron 1 of 21)	ELMO1
Peak_28959	chr12	46664690	46665238	-1.51276	0.00512207	Intron (ENST00000667191.1/100288798, intron 2 of 2)	SLC38A4
Peak_28650	chr6	15308187	15308580	-1.51268	0.0110662	Intron (ENST00000341776.7/3720, intron 1 of 17)	JARID2
Peak_22469	chr5	143222471	143223176	-1.51159	3.14348e-07	3' UTR	ARHGAP26
Peak_30256	chr7	815703	816162	-1.51123	0.0262696	Promoter (<=1kb)	SUN1
Peak_15429	chr1	39215835	39217207	-1.51115	1.71945e-06	Promoter (<=1kb)	MACF1
Peak_27479	chr3	47117701	47118037	-1.50874	0.0149027	Intron (ENST00000431180.5/29072, intron 1 of 18)	SETD2
Peak_17462	chr12	110689226	110689857	-1.50808	0.0122432	Promoter (<=1kb)	HVCN1
Peak_19515	chr6	135880145	135881009	-1.50642	6.18993e-06	Promoter (<=1kb)	LOC101928373
Peak_5074	chr9	112330644	112333658	-1.50631	1.06351e-05	Promoter (<=1kb)	PTBP3
Peak_22145	chr7	130956766	130957243	-1.5056	0.00082725	Intron (ENST00000642963.1/378805, intron 3 of 6)	LINC-PINT
Peak_14191	chr1	218351169	218351799	-1.50408	0.00793627	Intron (ENST00000366930.9/7042, intron 1 of 6)	TGFB2
Peak_48992	chr13	24203439	24203693	-1.5039	0.00155738	Intron (ENST00000382141.4/221178, intron 3 of 15)	SPATA13
Peak_17565	chr3	169666248	169666993	-1.50314	0.0016929	Distal Intergenic	MECOM
Peak_18188	chr2	191571054	191571597	-1.50311	0.0285314	Distal Intergenic	NABP1
Peak_20313	chr12	128830492	128830903	-1.50261	0.0276338	Distal Intergenic	SLC15A4
Peak_25334	chr4	182139689	182139968	-1.50221	0.0440356	Intron (ENST00000509012.5/90768, intron 1 of 4)	TENM3-AS1
Peak_23565	chr1	6465786	6466064	-1.50183	0.0257085	Promoter (<=1kb)	TNFRSF25
Peak_16997	chr12	67698620	67699186	-1.50109	0.0202745	Distal Intergenic	LINC02421
Peak_37917	chr19	32223663	32224230	-1.50099	0.0223881	Distal Intergenic	LINC01782
Peak_27154	chr2	186889094	186889545	-1.50034	0.00198557	Distal Intergenic	ZSWIM2
Peak_17642	chr1	186618414	186618978	-1.50031	0.00653723	Distal Intergenic	PTGS2
Peak_16146	chr2	161500920	161501531	-1.49884	0.036179	Exon (ENST00000420969.1/285116, exon 1 of 1)	AHCTF1P1
Peak_31091	chr10	73591210	73591519	-1.49742	0.0368203	Promoter (<=1kb)	USP54
Peak_29101	chr3	62445279	62445959	-1.49701	0.0308183	Exon (ENST00000612439.4/8618, exon 25 of 28)	CADPS
Peak_24546	chr9	38227182	38227784	-1.49695	0.027409	Distal Intergenic	LOC107987065
Peak_29239	chr5	135372800	135373228	-1.49498	0.000541825	Intron (ENST00000511689.5/9555, intron 2 of 8)	MACROH2A1
Peak_10437	chr16	30021095	30021769	-1.49479	0.026694	Promoter (<=1kb)	DOC2A
Peak_32114	chr18	13577528	13577888	-1.49346	0.000344157	Intron (ENST00000679177.1/753, intron 3 of 5)	MIR4526
Peak_38771	chr10	15169650	15170090	-1.49295	0.00235631	Promoter (<=1kb)	NMT2
Peak_25823	chr6	132131046	132131380	-1.49278	0.012937	Promoter (<=1kb)	LINC01013
Peak_19445	chr7	94394631	94395276	-1.49188	0.012737	Promoter (<=1kb)	COL1A2
Peak_27774	chr17	76515671	76515847	-1.49166	0.0132344	Distal Intergenic	PRCD
Peak_24128	chr10	8060666	8061018	-1.49072	0.0181258	Intron (ENST00000379328.9/2625, intron 3 of 5)	GATA3
Peak_5787	chr21	38734023	38735174	-1.49013	0.00254967	Exon (ENST00000663481.1/400866, exon 4 of 4)	LINC00114
Peak_20919	chr3	138200129	138200488	-1.49	0.00718272	Intron (ENST00000538260.5/25852, intron 1 of 20)	ARMC8
Peak_1882	chr11	112024153	112026288	-1.4894	2.42545e-05	Promoter (<=1kb)	DLAT
Peak_20173	chr2	239252864	239253537	-1.48875	0.000245721	Intron (ENST00000345617.7/9759, intron 2 of 26)	HDAC4
Peak_24038	chr6	139131761	139132149	-1.48669	0.00240934	Distal Intergenic	HECA
Peak_20387	chr1	247127690	247128146	-1.48594	0.0102616	Intron (ENST00000472531.5/7678, intron 3 of 3)	LINC02897
Peak_25414	chr1	229280627	229280836	-1.48339	0.00104298	Intron (ENST00000618010.4/5867, intron 1 of 5)	RAB4A
Peak_26288	chr4	123443876	123444678	-1.48319	0.000385388	Distal Intergenic	SPRY1
Peak_39954	chr12	13179146	13179827	-1.48211	0.00876185	Distal Intergenic	EMP1
Peak_29688	chr1	27599380	27599782	-1.48174	0.00954549	Intron (ENST00000247087.10/27245, intron 1 of 5)	AHDC1
Peak_9102	chr12	109994113	109996822	-1.4798	0.000419918	Promoter (<=1kb)	GIT2
Peak_10638	chr7	101816575	101818544	-1.47926	4.03726e-06	Promoter (<=1kb)	CUX1
Peak_26445	chr10	101063464	101064040	-1.47833	0.000758491	Promoter (<=1kb)	KAZALD1
Peak_19078	chr1	164625118	164625617	-1.47773	0.00495568	Promoter (<=1kb)	PBX1
Peak_24093	chr4	38177066	38177433	-1.47771	0.00915035	Distal Intergenic	TBC1D1
Peak_41171	chr10	49272828	49273104	-1.47762	0.00850473	Distal Intergenic	C10orf71-AS1
Peak_13966	chr10	15088213	15089061	-1.47744	0.0387351	Promoter (<=1kb)	ACBD7
Peak_34155	chr1	232725834	232726372	-1.47742	0.00267696	Distal Intergenic	LINC01745
Peak_16613	chr17	47162000	47162547	-1.47705	0.00101434	Exon (ENST00000647948.1/ENST00000647948.1, exon 2 of 3)	CDC27
Peak_21484	chr11	8913875	8914539	-1.47679	0.037186	Intron (ENST00000299576.9/56672, intron 2 of 4)	AKIP1
Peak_1093	chr3	18442514	18445252	-1.47496	0.0001538	Promoter (<=1kb)	SATB1-AS1
Peak_18985	chr6	45323409	45324210	-1.47492	0.00405263	Intron (ENST00000475057.5/8464, intron 2 of 11)	RUNX2
Peak_20688	chr1	111507668	111508382	-1.47415	0.026694	Intron (ENST00000369717.8/57413, intron 1 of 5)	TMIGD3
Peak_31692	chr10	11573487	11573999	-1.47282	0.00122711	Promoter (<=1kb)	USP6NL
Peak_20210	chr6	136889857	136890159	-1.47232	0.00966712	Intron (ENST00000541292.6/5191, intron 9 of 10)	SLC35D3
Peak_32277	chr6	35311396	35311735	-1.47197	0.0242689	Promoter (1-2kb)	DEF6
Peak_38855	chr1	9020211	9020519	-1.47046	0.0320048	Intron (ENST00000400906.2/155184, intron 3 of 11)	SLC2A7
Peak_4913	chr3	14946271	14947595	-1.46991	0.0275636	Promoter (<=1kb)	FGD5-AS1
Peak_16342	chr8	79890699	79892193	-1.46866	0.000125344	Exon (ENST00000669451.1/ENST00000669451.1, exon 1 of 3)	LOC101927040
Peak_4253	chr12	116274425	116277581	-1.46738	3.61634e-06	Promoter (<=1kb)	MED13L
Peak_14296	chr7	100852234	100853545	-1.46726	0.000443569	Promoter (<=1kb)	SLC12A9-AS1
Peak_24793	chr18	3016702	3017040	-1.46679	0.0432342	Distal Intergenic	LPIN2
Peak_38858	chr10	103911155	103911565	-1.46644	0.00567626	Intron (ENST00000224950.8/79991, intron 2 of 9)	STN1
Peak_2585	chr6	116681135	116683124	-1.46629	3.99581e-08	Promoter (<=1kb)	KPNA5
Peak_17540	chr2	222305175	222306505	-1.4661	0.0154674	Exon (ENST00000647762.1/151278, exon 2 of 2)	CCDC140
Peak_29196	chr21	15445257	15445561	-1.46591	0.00616399	Promoter (<=1kb)	LOC101927745
Peak_2156	chr2	68465996	68467424	-1.4653	0.0442763	Promoter (<=1kb)	FBXO48
Peak_21555	chr7	87039157	87039748	-1.46509	0.0375677	Intron (ENST00000450689.7/222223, intron 1 of 21)	ELAPOR2
Peak_34766	chr7	114930984	114931242	-1.46415	0.013898	Intron (ENST00000393486.5/29969, intron 2 of 4)	MDFIC
Peak_15425	chr12	94207947	94208368	-1.46233	0.00318303	Intron (ENST00000258526.9/10154, intron 4 of 30)	PLXNC1
Peak_12884	chr13	46667712	46668693	-1.46074	0.000215301	Intron (ENST00000311191.10/23143, intron 2 of 18)	LRCH1
Peak_19758	chr12	5887900	5888523	-1.45973	0.00659384	Intron (ENST00000546188.5/57101, intron 3 of 24)	ANO2
Peak_978	chr1	44404763	44410487	-1.45883	1.75267e-06	Promoter (<=1kb)	RNF220
Peak_31200	chr5	141484462	141484701	-1.45864	0.0182258	Promoter (<=1kb)	PCDHGC4
Peak_830	chr17	61926736	61928434	-1.45415	0.000994203	Promoter (<=1kb)	INTS2
Peak_14842	chr12	21774957	21775962	-1.4515	0.0436758	Promoter (<=1kb)	KCNJ8
Peak_20869	chr3	69092448	69092876	-1.45129	0.000533461	Intron (ENST00000273258.4/10550, intron 1 of 2)	ARL6IP5
Peak_22633	chr1	53062317	53062827	-1.45077	0.0387524	Promoter (<=1kb)	PODN
Peak_24542	chr7	66281718	66282065	-1.45029	0.00268155	Intron (ENST00000480281.5/8460, intron 1 of 4)	TPST1
Peak_26989	chr3	63960124	63960898	-1.44862	0.0164312	Intron (ENST00000674280.1/6314, intron 5 of 12)	ATXN7
Peak_5552	chr2	117813917	117815647	-1.44771	0.0256933	Promoter (<=1kb)	DDX18
Peak_6783	chr3	115145630	115146936	-1.44632	0.000796092	Promoter (<=1kb)	ZBTB20
Peak_21467	chr2	6933975	6934356	-1.44432	0.0229532	Promoter (<=1kb)	RNF144A
Peak_24886	chr20	41615714	41615997	-1.4439	0.0100015	Promoter (<=1kb)	CHD6
Peak_35106	chr12	89244678	89244900	-1.44305	0.0194721	Intron (ENST00000549278.2/728084, intron 1 of 6)	LINC02458
Peak_22413	chr12	6532270	6532622	-1.44276	0.00373245	Promoter (<=1kb)	GAPDH-DT
Peak_44993	chr1	31714415	31714929	-1.44248	0.0370497	Distal Intergenic	COL16A1
Peak_29497	chr8	42355548	42356181	-1.44075	0.00250028	Promoter (<=1kb)	POLB
Peak_5135	chr14	35045241	35046175	-1.43921	0.00884704	Promoter (<=1kb)	FAM177A1
Peak_23222	chr6	139290608	139291275	-1.43883	0.0360812	Promoter (<=1kb)	TXLNB
Peak_24171	chr4	86960759	86961599	-1.43826	2.40536e-05	Intron (ENST00000504956.5/4299, intron 2 of 2)	AFF1
Peak_4308	chr13	50909393	50912114	-1.43809	1.97074e-07	Promoter (<=1kb)	RNASEH2B-AS1
Peak_18101	chr17	63752033	63752401	-1.43757	0.00526303	Promoter (<=1kb)	STRADA
Peak_19079	chr1	35264824	35265501	-1.43729	0.00817026	Distal Intergenic	ZMYM4
Peak_26737	chr3	169158951	169159216	-1.43581	0.00423647	Intron (ENST00000651503.2/2122, intron 2 of 16)	MECOM
Peak_27500	chr20	51695721	51696329	-1.43545	0.00109621	Exon (ENST00000338821.6/10079, exon 6 of 28)	ATP9A
Peak_9868	chr2	234950826	234951800	-1.43403	0.00125467	Promoter (<=1kb)	SH3BP4
Peak_16127	chr18	48008385	48008853	-1.43187	0.0295347	Distal Intergenic	SMAD2
Peak_18110	chr7	111238570	111239332	-1.4316	0.00167083	Intron (ENST00000405709.7/83943, intron 3 of 5)	LRRN3
Peak_21404	chr20	63568102	63568683	-1.43142	0.000179622	Promoter (<=1kb)	HELZ2
Peak_31747	chr6	106519219	106519597	-1.43103	0.00400184	Exon (ENST00000633556.3/202, exon 4 of 22)	CRYBG1
Peak_18189	chr12	6532774	6533217	-1.43087	0.0140162	Promoter (<=1kb)	GAPDH-DT
Peak_11781	chr20	40968885	40969372	-1.43011	0.0334166	Distal Intergenic	TOP1
Peak_27310	chr13	48449061	48449381	-1.42848	0.0132299	Intron (ENST00000650461.1/5925, intron 17 of 26)	RB1
Peak_6744	chr14	102592604	102594661	-1.42796	0.00102033	Promoter (<=1kb)	RCOR1
Peak_35585	chr5	37552744	37553244	-1.42512	0.0229933	Intron (ENST00000504564.1/55100, intron 9 of 11)	WDR70
Peak_23268	chr9	31908647	31909249	-1.42335	0.0347256	Distal Intergenic	ACO1
Peak_14007	chr19	53870398	53871008	-1.4226	3.68881e-05	Promoter (<=1kb)	MYADM
Peak_15097	chr5	131546942	131548482	-1.42109	9.30232e-06	Exon (ENST00000509018.6/51735, exon 6 of 28)	RAPGEF6
Peak_29551	chr11	102920354	102920735	-1.41919	0.025527	Distal Intergenic	MMP13
Peak_13105	chr9	35726860	35729017	-1.41889	4.60765e-05	Intron (ENST00000314888.10/7094, intron 1 of 56)	TLN1
Peak_21672	chr1	31373854	31374057	-1.41858	0.0416155	Promoter (<=1kb)	FABP3
Peak_31495	chr16	57530406	57530649	-1.41845	0.0202745	Intron (ENST00000258214.3/92922, intron 1 of 8)	CCDC102A
Peak_28807	chr2	37582804	37583081	-1.41829	0.00290674	Intron (ENST00000659653.1/105374464, intron 2 of 2)	LOC105374464
Peak_3659	chr5	81970717	81971871	-1.41615	0.0047282	Promoter (<=1kb)	ATG10
Peak_27000	chr5	124057010	124057455	-1.41406	0.00986166	Distal Intergenic	LOC101927397
Peak_13023	chr9	125758924	125760244	-1.41359	0.000111554	Intron (ENST00000342287.9/5090, intron 2 of 7)	PBX3
Peak_45054	chr19	16328633	16328998	-1.41026	0.00555239	3' UTR	KLF2
Peak_4143	chr4	56907896	56910482	-1.40966	0.0010314	Promoter (<=1kb)	REST
Peak_26974	chr12	31362768	31363143	-1.40932	0.0149027	Distal Intergenic	LINC02387
Peak_19194	chr4	39029957	39031740	-1.40906	0.000222489	Promoter (<=1kb)	TMEM156
Peak_7996	chr20	51541443	51542753	-1.409	0.0374228	Promoter (<=1kb)	NFATC2
Peak_25584	chr3	71542273	71542878	-1.40806	1.60447e-05	Promoter (<=1kb)	MIR1284
Peak_6111	chr2	58427063	58428605	-1.40671	0.0341009	Promoter (<=1kb)	LINC01122
Peak_42171	chr3	30658422	30658761	-1.40593	0.026987	Intron (ENST00000295754.10/7048, intron 3 of 6)	TGFBR2
Peak_15437	chr2	168490111	168491480	-1.40571	0.00116874	Intron (ENST00000392687.4/253782, intron 1 of 10)	CERS6
Peak_2424	chr13	41016984	41020223	-1.40521	6.58523e-06	Promoter (<=1kb)	ELF1
Peak_24554	chr10	80144581	80145132	-1.40448	0.0417435	Promoter (<=1kb)	PLAC9
Peak_9535	chr5	143434932	143435652	-1.40413	0.0184294	Promoter (<=1kb)	NR3C1
Peak_3718	chr11	7986678	7988380	-1.40308	0.0190204	Promoter (<=1kb)	EIF3F
Peak_14608	chr18	35616360	35617063	-1.40286	0.00051562	Intron (ENST00000586725.1/2589, intron 1 of 2)	GALNT1
Peak_25453	chr7	7989503	7990266	-1.40283	0.000349906	Intron (ENST00000469183.5/729852, intron 4 of 4)	GLCCI1
Peak_14910	chr5	124651356	124652518	-1.40277	0.00588904	Intron (ENST00000513986.2/57507, intron 3 of 9)	ZNF608
Peak_23266	chr9	123927978	123928214	-1.40218	0.0258216	Promoter (1-2kb)	DENND1A
Peak_12866	chr7	18289899	18291582	-1.40215	0.00162023	Promoter (<=1kb)	LOC107986698
Peak_836	chr3	141738196	141739795	-1.40173	0.00910805	Promoter (<=1kb)	GRK7
Peak_38392	chr16	47493470	47493622	-1.401	0.00365844	Intron (ENST00000566037.6/5257, intron 2 of 7)	PHKB
Peak_17667	chr8	102197106	102197565	-1.39971	0.0159585	Distal Intergenic	RRM2B
Peak_17044	chr3	152472080	152472691	-1.39859	0.003689	Intron (ENST00000463255.1/105374163, intron 1 of 1)	MBNL1
Peak_25056	chr2	27946532	27946974	-1.39775	0.00208091	Intron (ENST00000448427.1/9577, intron 5 of 5)	MIR4263
Peak_32931	chr20	53589285	53590020	-1.39686	0.0242689	Intron (ENST00000371471.7/7764, intron 1 of 5)	ZNF217
Peak_26357	chr7	101913646	101914304	-1.39506	0.0019943	Promoter (<=1kb)	CUX1
Peak_24285	chr18	77124422	77124690	-1.39423	0.0285314	Intron (ENST00000355994.7/4155, intron 1 of 8)	MBP
Peak_26642	chr2	7899418	7900039	-1.39351	0.0274898	Promoter (<=1kb)	LOC101929551
Peak_3608	chr7	26863550	26865457	-1.39301	0.0250335	Promoter (<=1kb)	SKAP2
Peak_680	chr19	44207085	44208201	-1.39278	0.00567626	Promoter (<=1kb)	ZNF227
Peak_41041	chr12	108313320	108313768	-1.39266	0.000255326	Intron (ENST00000412676.5/1240, intron 1 of 2)	CMKLR1
Peak_22361	chr11	78350058	78351242	-1.39247	0.000229301	Intron (ENST00000534168.1/ENST00000534168.1, intron 1 of 1)	GAB2
Peak_1162	chr12	9757359	9761794	-1.39022	9.30232e-06	Promoter (<=1kb)	CD69
Peak_27023	chr10	62082361	62083267	-1.38973	0.00219018	Intron (ENST00000279873.12/84159, intron 8 of 9)	ARID5B
Peak_3828	chr6	156777853	156783214	-1.38855	0.000345751	Promoter (<=1kb)	MIR4466
Peak_16666	chr9	122900686	122901557	-1.38797	7.85275e-05	Intron (ENST00000357244.7/54542, intron 1 of 20)	RC3H2
Peak_34398	chr20	53934465	53934838	-1.38744	0.0138077	Distal Intergenic	SUMO1P1
Peak_29310	chr15	70492257	70492916	-1.38711	0.00642431	Distal Intergenic	LINC02205
Peak_19563	chr6	129490618	129491120	-1.38668	0.0210582	Promoter (<=1kb)	LAMA2
Peak_33947	chr3	150605699	150606453	-1.38572	1.86777e-06	Intron (ENST00000480740.5/51714, intron 1 of 5)	SELENOT
Peak_29434	chr14	74618301	74618535	-1.38496	0.0250066	Distal Intergenic	LTBP2
Peak_2390	chr20	2652577	2653755	-1.38488	0.0332103	Promoter (<=1kb)	MIR1292
Peak_4619	chr17	8185572	8187810	-1.38454	0.0351832	Promoter (<=1kb)	MIR4521
Peak_15881	chr9	37034136	37034752	-1.38398	0.0454909	Promoter (<=1kb)	PAX5
Peak_22169	chr10	34780876	34781160	-1.38247	0.0217848	Intron (ENST00000545260.5/56288, intron 1 of 22)	PARD3
Peak_4632	chr12	8890672	8891155	-1.38194	0.0466504	Intron (ENST00000631830.1/ENST00000631830.1, intron 1 of 1)	A2ML1
Peak_27481	chr3	50624215	50624758	-1.37888	0.00098791	Intron (ENST00000446044.5/7867, intron 4 of 12)	MAPKAPK3
Peak_22290	chr1	205440931	205441301	-1.37878	0.0080176	5' UTR	MIR135B
Peak_21676	chr11	61516536	61517165	-1.37738	0.00544688	3' UTR	LRRC10B
Peak_19875	chr18	48136668	48137465	-1.37639	0.00243421	Promoter (<=1kb)	ZBTB7C
Peak_27376	chr1	198179677	198180114	-1.3759	0.0107938	Intron (ENST00000442588.5/140609, intron 1 of 3)	NEK7
Peak_48468	chr11	59216792	59217228	-1.3752	0.0323879	Distal Intergenic	MPEG1
Peak_19227	chr4	73223252	73223707	-1.3746	0.034367	Promoter (<=1kb)	ANKRD17
Peak_20145	chr6	162706165	162706749	-1.37447	0.0463324	Exon (ENST00000674353.1/5071, exon 2 of 2)	PACRG
Peak_10879	chr10	47383910	47385241	-1.37442	0.0343897	Promoter (<=1kb)	ZNF488
Peak_13944	chr12	118357148	118359826	-1.37317	3.94216e-07	Promoter (<=1kb)	TAOK3
Peak_17312	chr4	102560088	102560609	-1.37262	0.000263127	Intron (ENST00000394820.8/4790, intron 5 of 23)	NFKB1
Peak_15436	chr12	26299227	26299613	-1.37243	0.012397	Promoter (1-2kb)	LOC105369705
Peak_45203	chr12	95227884	95228277	-1.37204	0.00307559	Intron (ENST00000549589.5/55591, intron 1 of 5)	VEZT
Peak_2232	chr6	116667457	116668900	-1.3718	0.0236045	Promoter (<=1kb)	ZUP1
Peak_17047	chr2	74031880	74032551	-1.36984	0.00118684	Intron (ENST00000409262.8/200424, intron 3 of 11)	TET3
Peak_14643	chr8	97560000	97560467	-1.36939	0.0256933	Distal Intergenic	MTDH
Peak_25851	chr21	31265347	31265924	-1.36729	0.0106083	Intron (ENST00000286827.7/7074, intron 5 of 28)	TIAM1
Peak_25605	chr12	38771806	38772313	-1.36486	0.00184083	Intron (ENST00000331366.10/144402, intron 7 of 19)	CPNE8
Peak_20759	chr1	198929965	198930644	-1.36426	0.0195748	Intron (ENST00000660348.1/100131234, intron 1 of 2)	MIR181A1HG
Peak_6900	chr13	32585500	32586320	-1.36366	0.0102944	Promoter (<=1kb)	PDS5B
Peak_24609	chr10	103758014	103758292	-1.36347	0.0147593	Intron (ENST00000369774.8/9644, intron 3 of 14)	SH3PXD2A-AS1
Peak_8485	chr3	71723696	71725327	-1.36186	0.0135726	Promoter (<=1kb)	EIF4E3
Peak_8743	chr11	130312988	130314782	-1.36134	0.000396504	Promoter (<=1kb)	ZBTB44
Peak_21853	chr16	89917667	89918655	-1.3607	0.042023	Promoter (<=1kb)	MC1R
Peak_19161	chr15	90657448	90657852	-1.36057	0.0282377	Intron (ENST00000559531.1/101926895, intron 2 of 3)	LINC01585
Peak_39014	chr3	108546427	108546773	-1.36003	0.000547018	Distal Intergenic	MYH15
Peak_4706	chr4	83112343	83115233	-1.35884	0.00137673	Promoter (<=1kb)	PLAC8
Peak_17037	chr2	174593186	174594326	-1.35855	0.000928665	Intron (ENST00000442996.1/ENST00000442996.1, intron 2 of 3)	WIPF1
Peak_17638	chr2	11719242	11719884	-1.3575	0.0423976	Intron (ENST00000449576.6/23175, intron 2 of 21)	LOC101929752
Peak_27360	chr7	92828220	92828564	-1.35697	0.0336601	Intron (ENST00000265734.8/1021, intron 2 of 7)	CDK6
Peak_6533	chr2	64766733	64769014	-1.35608	0.000705237	Distal Intergenic	SERTAD2
Peak_10959	chr3	179652092	179653034	-1.35602	0.00098674	Promoter (<=1kb)	USP13
Peak_27329	chr14	101875885	101876397	-1.35595	4.88515e-05	Intron (ENST00000422945.6/5527, intron 4 of 15)	PPP2R5C
Peak_2374	chr7	100584487	100586248	-1.35552	0.0141993	Promoter (<=1kb)	FBXO24
Peak_13668	chr13	24267019	24267705	-1.35539	0.0283734	Intron (ENST00000382141.4/221178, intron 5 of 15)	SPATA13
Peak_28753	chr5	131253010	131253313	-1.35495	0.00810561	Promoter (<=1kb)	CDC42SE2
Peak_26884	chr3	67655529	67655903	-1.35484	0.00182659	Promoter (<=1kb)	SUCLG2-DT
Peak_30840	chr7	137996337	137996794	-1.35467	0.0152469	Intron (ENST00000330387.11/64764, intron 1 of 11)	CREB3L2
Peak_941	chr10	5094230	5096855	-1.35404	8.06503e-05	Promoter (<=1kb)	AKR1C3
Peak_9801	chr2	113583369	113584169	-1.35264	0.0451237	Promoter (<=1kb)	MIR1302-3
Peak_453	chr12	26936007	26941796	-1.35205	4.41846e-07	Promoter (<=1kb)	FGFR1OP2
Peak_16653	chr16	66590322	66590841	-1.35202	0.00365844	Distal Intergenic	CMTM2
Peak_2415	chr15	77420354	77421845	-1.35174	0.0105784	Promoter (<=1kb)	HMG20A
Peak_27170	chr10	3554163	3554411	-1.35065	0.0216402	Intron (ENST00000654955.1/ENST00000654955.1, intron 2 of 2)	LINC02669
Peak_8626	chr4	42657238	42658488	-1.35031	0.00191615	Promoter (<=1kb)	ATP8A1
Peak_7881	chr2	151289206	151290581	-1.34974	0.0374228	Promoter (<=1kb)	NMI
Peak_14898	chr14	81474010	81474556	-1.34938	0.0271924	3' UTR	SEL1L
Peak_24377	chr6	89073019	89073468	-1.3483	0.033375	Distal Intergenic	PNRC1
Peak_31934	chr12	56720419	56720779	-1.34706	0.03712	Exon (ENST00000550952.6/4666, exon 3 of 11)	NACA
Peak_32562	chr12	92147419	92147738	-1.34613	0.00401784	Promoter (1-2kb)	BTG1-DT
Peak_2993	chr2	187552492	187555043	-1.34556	0.0167654	Promoter (<=1kb)	TFPI
Peak_21660	chr13	50916934	50917490	-1.34416	0.00641686	Intron (ENST00000422660.6/79621, intron 1 of 9)	RNASEH2B
Peak_39294	chr17	77400512	77400755	-1.34329	0.0163534	Promoter (<=1kb)	SEPTIN9
Peak_23991	chr6	22929189	22929485	-1.34309	0.00556255	Intron (ENST00000420572.2/ENST00000420572.2, intron 2 of 2)	LOC102724736
Peak_34292	chr2	207107723	207108161	-1.34214	0.000758491	Promoter (1-2kb)	MIR2355
Peak_24072	chr20	38875096	38875937	-1.342	0.0388167	Intron (ENST00000299824.6/26051, intron 2 of 10)	PPP1R16B
Peak_39311	chr3	30435755	30436259	-1.34185	0.00138244	Distal Intergenic	LINC01985
Peak_30999	chr17	62653451	62653943	-1.34183	0.00772054	Intron (ENST00000303375.10/9902, intron 1 of 29)	MRC2
Peak_23509	chr17	28952627	28952990	-1.34179	0.0316808	Promoter (<=1kb)	PIPOX
Peak_35752	chr8	81093516	81094022	-1.34108	0.00220097	Intron (ENST00000220597.4/55824, intron 1 of 8)	PAG1
Peak_16789	chr19	40609336	40610069	-1.34075	0.0279468	Promoter (<=1kb)	LTBP4
Peak_6229	chr9	78031848	78033415	-1.3406	0.00056347	Promoter (<=1kb)	GNAQ
Peak_5860	chr10	22251149	22255000	-1.33701	4.89146e-06	Promoter (<=1kb)	LOC100130992
Peak_30554	chr22	17087508	17087879	-1.33593	0.00220719	Intron (ENST00000477874.1/23765, intron 1 of 3)	IL17RA
Peak_2266	chr3	169143326	169147918	-1.33558	0.000849472	Promoter (<=1kb)	MECOM
Peak_6105	chr7	37340728	37343431	-1.33477	2.14217e-08	Promoter (<=1kb)	ELMO1
Peak_25322	chr9	20508246	20508688	-1.33366	0.00789685	Intron (ENST00000380338.9/4300, intron 2 of 10)	MIR4474
Peak_44689	chr8	30389218	30389492	-1.33245	0.00387645	Intron (ENST00000339877.8/11030, intron 1 of 6)	RBPMS
Peak_25282	chr12	27555391	27555825	-1.33232	0.00713793	Intron (ENST00000538433.5/8496, intron 1 of 4)	PPFIBP1
Peak_18642	chr10	22666170	22667046	-1.33043	0.00237266	Intron (ENST00000376573.9/5305, intron 1 of 9)	PIP4K2A
Peak_24169	chr17	18901109	18901396	-1.32869	0.0198368	Intron (ENST00000432893.6/5636, intron 7 of 8)	PRPSAP2
Peak_25331	chr2	11326568	11326923	-1.32694	0.0115543	Intron (ENST00000315872.11/9475, intron 1 of 32)	ROCK2
Peak_19724	chr17	75032175	75032752	-1.32599	0.0302627	Promoter (<=1kb)	KCTD2
Peak_27201	chr4	14111774	14112299	-1.32404	0.0272151	Promoter (<=1kb)	LINC01085
Peak_13943	chr6	151690358	151691832	-1.32368	0.000452222	Promoter (<=1kb)	ESR1
Peak_25464	chr3	101379963	101380303	-1.32367	0.0415734	Intron (ENST00000394095.7/57337, intron 6 of 23)	SENP7
Peak_25614	chr2	167196291	167197301	-1.32305	0.0194709	Intron (ENST00000409195.6/129446, intron 3 of 10)	XIRP2
Peak_961	chr10	61899003	61904985	-1.32199	5.84024e-07	Promoter (<=1kb)	ARID5B
Peak_3902	chr2	53766996	53768682	-1.32177	0.0118345	Promoter (<=1kb)	GPR75-ASB3
Peak_28359	chr11	73461900	73462398	-1.32159	0.000732712	Intron (ENST00000356467.5/23201, intron 2 of 7)	FAM168A
Peak_38305	chr8	38527600	38528013	-1.32128	0.0452246	Promoter (<=1kb)	C8orf86
Peak_29509	chr17	77445705	77446361	-1.321	0.015972	Promoter (1-2kb)	LOC112268198
Peak_30985	chr15	64695357	64695549	-1.32014	0.0317914	Promoter (<=1kb)	OAZ2
Peak_18524	chr17	59829596	59829985	-1.31992	0.0292514	Intron (ENST00000262291.9/81671, intron 10 of 11)	VMP1
Peak_6289	chr5	173917676	173919028	-1.3194	2.96724e-05	Promoter (<=1kb)	CPEB4
Peak_19731	chr1	22089557	22090448	-1.31725	0.000848068	3' UTR	CDC42
Peak_21466	chr2	196987951	196988407	-1.31537	0.0193691	3' UTR	ANKRD44
Peak_21471	chr7	125561070	125561723	-1.31482	0.0134857	Distal Intergenic	LOC100506664
Peak_3470	chr11	77819087	77820915	-1.31469	0.0149598	Promoter (<=1kb)	RSF1
Peak_14105	chr19	40464976	40465872	-1.31375	0.0125302	Promoter (<=1kb)	BLVRB
Peak_5628	chr6	45419179	45422734	-1.31355	0.00482724	Promoter (<=1kb)	RUNX2
Peak_23410	chr18	13562588	13563076	-1.31241	0.0018433	Exon (ENST00000590042.1/ENST00000590042.1, exon 2 of 3)	LOC102724615
Peak_24042	chr10	8404228	8404790	-1.31153	0.012975	Intron (ENST00000413286.1/105376396, intron 2 of 3)	LOC105376396
Peak_2531	chr3	182793478	182795561	-1.31127	0.00478084	Promoter (<=1kb)	ATP11B
Peak_24157	chr6	143554874	143555457	-1.31098	0.0121594	Exon (ENST00000657644.1/285740, exon 3 of 3)	PHACTR2-AS1
Peak_17246	chr14	32938022	32938721	-1.31037	0.00681304	Promoter (<=1kb)	NPAS3
Peak_24396	chr4	88613381	88613930	-1.31024	0.00370958	Intron (ENST00000512194.2/8916, intron 4 of 25)	HERC3
Peak_1997	chr12	4648186	4650338	-1.30859	0.00098674	Promoter (<=1kb)	AKAP3
Peak_21365	chr3	111913154	111914195	-1.30791	8.37405e-05	Promoter (1-2kb)	PHLDB2
Peak_4657	chr4	16226658	16229236	-1.30768	3.28361e-05	Promoter (<=1kb)	TAPT1
Peak_27287	chr1	18923980	18924243	-1.30689	0.00653723	Intron (ENST00000455833.7/126917, intron 1 of 8)	IFFO2
Peak_31749	chr6	152704989	152705580	-1.30663	0.0174166	Intron (ENST00000367245.5/80177, intron 1 of 1)	MYCT1
Peak_15377	chr7	17401557	17402003	-1.30652	0.0425286	Promoter (<=1kb)	LINC02888
Peak_30442	chr7	151017814	151018211	-1.30557	0.0295458	Promoter (<=1kb)	ATG9B
Peak_28566	chr5	95622384	95622685	-1.3054	0.0402898	Downstream (<=300bp)	GPR150
Peak_1376	chr7	106864665	106867171	-1.30518	0.00133793	Promoter (<=1kb)	PIK3CG
Peak_9008	chr3	20038515	20040297	-1.30483	0.00168394	Promoter (<=1kb)	KAT2B
Peak_10850	chr12	55743453	55744672	-1.30466	0.014834	Promoter (<=1kb)	GDF11
Peak_15836	chr2	176140379	176140995	-1.3043	0.0347256	Intron (ENST00000432796.2/3232, intron 1 of 1)	HOXD-AS2
Peak_484	chr20	34514910	34517483	-1.30388	0.000345751	Promoter (<=1kb)	DYNLRB1
Peak_28527	chr22	24305063	24305557	-1.30326	0.00686662	Promoter (<=1kb)	SPECC1L-ADORA2A
Peak_26827	chr10	103983756	103984015	-1.30126	0.0479239	Intron (ENST00000369755.4/9748, intron 1 of 18)	SLK
Peak_30761	chr4	81648734	81649162	-1.30126	0.0176098	Intron (ENST00000638048.1/153020, intron 3 of 16)	RASGEF1B
Peak_13250	chr3	4350970	4351836	-1.30118	0.00301556	Intron (ENST00000448413.5/285362, intron 8 of 12)	SETMAR
Peak_22852	chr21	17454235	17454659	-1.29907	0.0113221	Distal Intergenic	LINC01549
Peak_25737	chr1	59697334	59697744	-1.29894	0.0247904	3' UTR	FGGY
Peak_19979	chr7	42238079	42238521	-1.29863	0.0303492	Promoter (<=1kb)	GLI3
Peak_495	chr6	83858820	83861343	-1.29852	3.50048e-05	Promoter (<=1kb)	CYB5R4
Peak_11896	chr9	13279334	13280265	-1.2984	0.00774983	Promoter (<=1kb)	MPDZ
Peak_29529	chr12	46660609	46661049	-1.29696	0.00121893	Intron (ENST00000667191.1/100288798, intron 2 of 2)	SLC38A4
Peak_19759	chr8	120749353	120750005	-1.2969	0.000298903	Intron (ENST00000395601.7/6641, intron 2 of 7)	LOC101927543
Peak_20733	chr3	169348634	169349862	-1.29549	0.00986451	Intron (ENST00000651503.2/2122, intron 2 of 16)	MECOM
Peak_13309	chr3	115512450	115514039	-1.2944	0.0016929	Intron (ENST00000662602.1/101926886, intron 7 of 7)	GAP43
Peak_463	chr17	76734163	76737401	-1.29341	4.29974e-05	Promoter (<=1kb)	SRSF2
Peak_25255	chr3	152376522	152376826	-1.29287	0.00596312	Intron (ENST00000282486.10/4154, intron 2 of 9)	TMEM14EP
Peak_29643	chr5	67360171	67360565	-1.29263	0.0100961	Exon (ENST00000653057.1/ENST00000653057.1, exon 2 of 2)	LOC101928858
Peak_30115	chr22	37566280	37566495	-1.29256	0.0082537	Promoter (1-2kb)	CDC42EP1
Peak_40517	chr12	32522523	32522915	-1.29255	0.0249798	Intron (ENST00000534526.7/121512, intron 1 of 16)	FGD4
Peak_2298	chr5	59037153	59040881	-1.29239	2.02386e-09	Promoter (<=1kb)	PDE4D
Peak_20876	chr12	122882287	122883518	-1.29141	5.32763e-05	Exon (ENST00000623210.1/ENST00000623210.1, exon 1 of 1)	VPS37B
Peak_16894	chr20	33444541	33444920	-1.29081	0.0453161	Promoter (<=1kb)	SNTA1
Peak_5570	chr1	153944675	153946734	-1.29004	0.00270664	Promoter (<=1kb)	DENND4B
Peak_25271	chr1	173865912	173866124	-1.28972	0.0158316	Promoter (<=1kb)	GAS5
Peak_25735	chr13	99258911	99259450	-1.28928	0.0107151	Promoter (<=1kb)	GPR18
Peak_6116	chr5	121961009	121963587	-1.28867	0.000545608	Promoter (<=1kb)	SRFBP1
Peak_4182	chr6	2765445	2769462	-1.28734	4.39819e-07	Promoter (<=1kb)	WRNIP1
Peak_29907	chr16	90026143	90026517	-1.28584	0.00546895	Intron (ENST00000563980.5/2622, intron 3 of 4)	GAS8-AS1
Peak_48474	chr5	54646268	54646941	-1.28515	0.000419918	Distal Intergenic	LOC105378969
Peak_10433	chr13	19957080	19958453	-1.28441	0.00544688	Promoter (<=1kb)	ZMYM2
Peak_14100	chr8	26088801	26089592	-1.28412	0.0146638	Distal Intergenic	EBF2
Peak_21383	chr9	3508461	3509164	-1.28409	7.21875e-05	Intron (ENST00000382004.7/5991, intron 1 of 17)	RFX3
Peak_25343	chr1	221712988	221713520	-1.28401	0.00281671	Promoter (1-2kb)	DUSP10
Peak_14953	chr1	83692588	83694249	-1.28343	0.0168889	Intron (ENST00000417975.1/101927587, intron 2 of 2)	LINC01725
Peak_7866	chr5	117454786	117455891	-1.28283	0.0178685	Promoter (<=1kb)	LINC00992
Peak_27183	chr17	51238459	51238730	-1.28254	0.00659384	Intron (ENST00000586178.6/54799, intron 2 of 16)	MBTD1
Peak_14128	chr7	101856090	101857101	-1.28157	0.00214308	Intron (ENST00000437600.9/1523, intron 1 of 22)	CUX1
Peak_23378	chr9	121271809	121272075	-1.28146	0.0159832	Intron (ENST00000373823.7/2934, intron 8 of 24)	GSN
Peak_35437	chr10	4451288	4451694	-1.28133	0.0293162	Distal Intergenic	LINC00703
Peak_20249	chr20	44217528	44218318	-1.28073	0.0234506	Exon (ENST00000660003.1/100505783, exon 3 of 4)	OSER1-DT
Peak_14897	chr1	15829888	15830432	-1.28071	0.00105682	Distal Intergenic	SPEN
Peak_9549	chr4	38855895	38856959	-1.28063	0.0126829	Promoter (<=1kb)	TLR6
Peak_3634	chr10	21493816	21497810	-1.27846	0.000158346	Promoter (<=1kb)	MIR1915
Peak_1310	chr2	213148085	213151677	-1.27831	0.000957366	Promoter (<=1kb)	IKZF2
Peak_25625	chr7	115183614	115183876	-1.27285	0.0487509	Intron (ENST00000419883.1/104355291, intron 1 of 5)	LINC01392
Peak_31502	chr21	17816106	17816931	-1.27241	0.0117328	Intron (ENST00000284881.9/54149, intron 2 of 4)	C21orf91
Peak_16400	chr10	97196123	97196806	-1.27234	0.0396753	Promoter (<=1kb)	LOC112268065
Peak_6531	chr21	37364752	37366257	-1.27188	0.00540286	Promoter (<=1kb)	DYRK1A
Peak_8451	chr19	48720523	48721305	-1.27115	0.000464128	Promoter (<=1kb)	MAMSTR
Peak_3404	chr3	71576615	71584005	-1.271	4.48945e-09	Promoter (<=1kb)	LOC105377155
Peak_26629	chr17	76791434	76792012	-1.27075	0.00265821	Distal Intergenic	LINC02080
Peak_21538	chr14	54776411	54777197	-1.27064	0.0286938	Promoter (<=1kb)	SAMD4A
Peak_15167	chr10	114525724	114527452	-1.26986	0.00037687	Promoter (<=1kb)	ABLIM1
Peak_23315	chr9	2158790	2159466	-1.26969	0.0107983	Promoter (<=1kb)	SMARCA2
Peak_7463	chr12	109154648	109155575	-1.26951	0.0163526	Promoter (<=1kb)	ACACB
Peak_17393	chr1	61254624	61255667	-1.26732	0.0183232	Promoter (1-2kb)	NFIA-AS1
Peak_16700	chr11	70315651	70316161	-1.26691	0.00167458	Intron (ENST00000253925.12/8500, intron 2 of 27)	PPFIA1
Peak_22412	chr8	23881351	23881798	-1.26671	0.0437201	Distal Intergenic	STC1
Peak_3580	chr7	116210152	116212774	-1.26608	1.75735e-06	Promoter (<=1kb)	TES
Peak_8802	chr5	88502243	88503369	-1.26568	0.0461927	Distal Intergenic	LINC02060
Peak_13929	chr4	89055548	89057649	-1.26492	0.00579584	Promoter (<=1kb)	FAM13A
Peak_19177	chr8	26389913	26391119	-1.26223	0.00117103	Promoter (<=1kb)	BNIP3L
Peak_7995	chr12	91381430	91382276	-1.2621	0.0176098	Distal Intergenic	LINC02823
Peak_16420	chr15	60398115	60399227	-1.26048	0.0127937	Promoter (<=1kb)	ANXA2
Peak_22301	chr11	58524046	58525234	-1.26039	0.00980728	Distal Intergenic	OR5B21
Peak_4571	chr10	60777859	60779879	-1.26015	0.0258184	Promoter (<=1kb)	CDK1
Peak_1505	chr1	27772211	27774410	-1.25947	0.000443569	Promoter (<=1kb)	STX12
Peak_11026	chr16	82010706	82011915	-1.25898	0.00131086	Promoter (<=1kb)	SDR42E1
Peak_47447	chr1	154403583	154403758	-1.25839	0.0233546	Promoter (1-2kb)	IL6R
Peak_40042	chr5	131545846	131546294	-1.25792	0.0437201	Intron (ENST00000509018.6/51735, intron 6 of 27)	RAPGEF6
Peak_10575	chr12	10667991	10669125	-1.25774	0.0328279	Intron (ENST00000075503.8/55359, intron 1 of 10)	STYK1
Peak_1234	chr7	80134825	80137269	-1.25666	0.000305561	Promoter (<=1kb)	GNAI1
Peak_23291	chr8	124605010	124605335	-1.25658	0.00302862	Intron (ENST00000518547.6/9788, intron 3 of 13)	MTSS1
Peak_37834	chr3	149507757	149507994	-1.25461	0.0239879	Distal Intergenic	TM4SF4
Peak_24219	chr4	42396609	42397282	-1.25409	0.0163188	Promoter (<=1kb)	SHISA3
Peak_22647	chr10	126961121	126961767	-1.25345	2.10695e-05	Intron (ENST00000280333.9/1793, intron 1 of 51)	DOCK1
Peak_14867	chr3	87996840	87997670	-1.25278	0.0305885	Distal Intergenic	CGGBP1
Peak_26821	chr5	132456356	132456614	-1.25264	0.0453161	Intron (ENST00000378953.8/441108, intron 3 of 3)	RAD50
Peak_907	chr5	100900931	100905073	-1.2519	0.0216511	Promoter (<=1kb)	ST8SIA4
Peak_5964	chr13	60395586	60397284	-1.2516	0.0277138	Promoter (<=1kb)	TDRD3
Peak_28220	chr18	77054830	77055079	-1.25156	0.044125	Intron (ENST00000355994.7/4155, intron 3 of 8)	MBP
Peak_3612	chr3	108088628	108091049	-1.2511	0.00148602	Promoter (<=1kb)	CD47
Peak_18059	chr11	2480790	2481642	-1.2475	0.00236919	Intron (ENST00000496887.6/3784, intron 2 of 6)	KCNQ1
Peak_5274	chr4	155666280	155669242	-1.2469	0.00135379	Promoter (<=1kb)	GUCY1A1
Peak_20659	chr3	100047746	100048064	-1.24588	0.0102616	Intron (ENST00000463526.1/84319, intron 1 of 3)	FILIP1L
Peak_19109	chr15	55267332	55267931	-1.24584	0.00162023	Intron (ENST00000396307.6/5873, intron 1 of 5)	RAB27A
Peak_3025	chr14	21382857	21385319	-1.24503	0.00539804	Promoter (<=1kb)	SUPT16H
Peak_19105	chr2	239267297	239267559	-1.24469	0.00990697	Intron (ENST00000345617.7/9759, intron 2 of 26)	HDAC4
Peak_36479	chr10	15083931	15084114	-1.24439	0.029025	Intron (ENST00000356189.6/414149, intron 1 of 3)	ACBD7
Peak_31238	chr5	134545179	134545564	-1.24435	0.00439682	Promoter (<=1kb)	JADE2
Peak_15404	chr4	118888468	118889270	-1.24382	0.00877929	Promoter (<=1kb)	SYNPO2
Peak_36067	chr9	133869982	133870223	-1.24372	0.0261018	Intron (ENST00000406606.7/7410, intron 2 of 26)	VAV2
Peak_25668	chr5	77972038	77972780	-1.24357	0.00439682	Distal Intergenic	LOC101929154
Peak_36091	chr2	11830557	11830908	-1.24348	0.0399732	Distal Intergenic	LOC105373430
Peak_5068	chr6	83064830	83065924	-1.24274	0.00595718	Promoter (<=1kb)	UBE3D
Peak_18564	chr2	74032691	74033181	-1.24221	7.30179e-05	Intron (ENST00000409262.8/200424, intron 3 of 11)	TET3
Peak_14189	chr2	101473705	101475267	-1.24213	0.000229301	Promoter (<=1kb)	RFX8
Peak_26313	chr5	132819433	132820021	-1.24175	0.00484581	Distal Intergenic	SHROOM1
Peak_32118	chr2	112832244	112832568	-1.24045	0.0132299	Promoter (1-2kb)	IL1B
Peak_9046	chr1	169426966	169427890	-1.24026	0.0448904	Promoter (<=1kb)	CCDC181
Peak_18079	chr7	22727024	22727606	-1.24023	0.0495909	Promoter (<=1kb)	IL6
Peak_19893	chr19	40811182	40812405	-1.23762	0.00363943	Promoter (<=1kb)	CYP2T1P
Peak_29100	chr11	124725337	124726012	-1.23694	0.0159552	Distal Intergenic	NRGN
Peak_23273	chr14	75419124	75419527	-1.23593	0.00516908	Distal Intergenic	JDP2-AS1
Peak_35597	chr6	166439929	166440438	-1.23531	0.0185138	Exon (ENST00000491836.2/6196, exon 4 of 4)	RPS6KA2
Peak_8905	chr4	184028191	184029325	-1.23489	0.00019568	Distal Intergenic	STOX2
Peak_14381	chr3	88031427	88032513	-1.23425	0.0157827	Distal Intergenic	CGGBP1
Peak_14159	chr4	148216895	148217649	-1.23333	0.0214463	Intron (ENST00000344721.8/4306, intron 3 of 8)	NR3C2
Peak_16281	chr18	13612538	13613267	-1.23149	0.0188871	Promoter (<=1kb)	LDLRAD4
Peak_36097	chr6	298624	298853	-1.23082	0.00072322	Intron (ENST00000603296.5/56940, intron 1 of 5)	DUSP22
Peak_17023	chr4	184039890	184040619	-1.22927	0.00592356	Distal Intergenic	STOX2
Peak_27425	chr13	41916578	41916849	-1.22893	0.032503	Intron (ENST00000379310.8/23078, intron 2 of 44)	VWA8-AS1
Peak_18850	chr2	96145620	96146276	-1.22869	0.00203807	Promoter (<=1kb)	DUSP2
Peak_16659	chr12	124868745	124869834	-1.2286	0.000687694	Intron (ENST00000535005.5/949, intron 1 of 12)	SCARB1
Peak_22219	chr16	48621396	48622011	-1.22742	0.0316006	Promoter (1-2kb)	N4BP1
Peak_21050	chr1	247906445	247906871	-1.22724	0.0108715	Distal Intergenic	OR2W3
Peak_7372	chr9	13278094	13279204	-1.22704	0.0042676	Promoter (<=1kb)	MPDZ
Peak_14871	chr7	80137333	80138197	-1.22526	1.80392e-05	Promoter (1-2kb)	GNAI1
Peak_18106	chr8	73991322	73992279	-1.22442	0.00175003	Promoter (<=1kb)	LY96
Peak_14675	chr6	142381482	142384167	-1.22415	0.00190138	Exon (ENST00000230173.10/57211, exon 5 of 26)	ADGRG6
Peak_17389	chr19	29977951	29978714	-1.22407	0.0181258	Intron (ENST00000360605.8/8725, intron 2 of 10)	URI1
Peak_33956	chr5	140116201	140116580	-1.22397	0.0181875	3' UTR	PURA
Peak_3697	chr1	51517362	51519321	-1.22388	0.0112131	Promoter (<=1kb)	EPS15-AS1
Peak_29763	chr11	59566524	59566730	-1.22288	0.0324641	Promoter (<=1kb)	LINC02739
Peak_24161	chr7	120990694	120991777	-1.22151	0.00722979	Promoter (<=1kb)	CPED1
Peak_55400	chr8	57993945	57994206	-1.22142	0.0275861	Promoter (<=1kb)	FAM110B
Peak_16248	chr12	12992541	12993126	-1.22125	0.0176098	Intron (ENST00000014930.9/50865, intron 1 of 3)	HEBP1
Peak_6688	chr6	110039536	110040486	-1.22124	0.00659455	Promoter (<=1kb)	LOC107986631
Peak_5199	chr2	184596523	184601285	-1.22071	7.85275e-05	Promoter (<=1kb)	LOC105373780
Peak_29342	chr5	148808882	148809091	-1.22011	0.0461644	Distal Intergenic	ADRB2
Peak_18657	chr9	123796509	123797229	-1.22008	0.000696632	Promoter (1-2kb)	DENND1A
Peak_8662	chr16	21158104	21160141	-1.21994	0.000289868	Promoter (<=1kb)	DNAH3
Peak_30876	chr1	172381039	172381335	-1.21863	0.0182028	Intron (ENST00000627582.3/26052, intron 18 of 20)	DNM3
Peak_13454	chr11	87081312	87081998	-1.21857	0.0128461	Intron (ENST00000340353.11/65084, intron 3 of 13)	TMEM135
Peak_17338	chr1	208086398	208086921	-1.21827	0.0148599	Intron (ENST00000367033.4/5362, intron 9 of 31)	LOC105372887
Peak_20322	chr7	131231262	131231887	-1.21758	0.0224603	Intron (ENST00000421797.6/4289, intron 2 of 18)	MKLN1
Peak_4088	chr2	68249681	68252585	-1.21694	0.00157391	Promoter (<=1kb)	PPP3R1
Peak_3640	chr15	34037775	34040051	-1.2166	0.0130933	Promoter (<=1kb)	AVEN
Peak_28487	chr3	131386552	131387441	-1.21642	0.0148599	3' UTR	NUDT16
Peak_26672	chr10	33309388	33309612	-1.21607	0.0122432	Intron (ENST00000374875.5/8829, intron 2 of 15)	NRP1
Peak_13086	chr6	100228519	100229484	-1.21474	0.000691435	Distal Intergenic	SIM1
Peak_24497	chr16	10881388	10881605	-1.21445	0.0192298	Intron (ENST00000637439.1/4261, intron 1 of 6)	CIITA
Peak_25291	chr2	197198786	197199542	-1.21407	0.00106103	Promoter (<=1kb)	ANKRD44
Peak_3610	chr16	70800022	70801545	-1.21389	0.00438635	Promoter (<=1kb)	VAC14
Peak_6346	chr5	50665937	50668968	-1.2126	1.42413e-06	Promoter (<=1kb)	PARP8
Peak_17277	chr19	46955105	46955770	-1.21087	0.00172463	Intron (ENST00000672722.1/2909, intron 3 of 6)	ARHGAP35
Peak_27346	chr1	101079234	101079524	-1.20955	0.0131903	Intron (ENST00000451213.2/102606465, intron 3 of 4)	LOC102606465
Peak_32012	chr5	42591113	42591379	-1.20924	0.0408325	Intron (ENST00000230882.9/2690, intron 2 of 9)	GHR
Peak_6655	chr3	122577334	122578697	-1.20918	0.00579584	Promoter (<=1kb)	PARP15
Peak_4297	chr3	152202607	152205891	-1.2077	0.00090356	Distal Intergenic	MBNL1
Peak_2672	chr7	44845300	44848205	-1.20717	4.40535e-05	Promoter (<=1kb)	H2AZ2
Peak_25239	chr17	57284618	57285344	-1.20639	0.00154994	Promoter (<=1kb)	MSI2
Peak_19754	chr14	70018657	70019288	-1.20613	0.0104435	Intron (ENST00000361956.8/64093, intron 10 of 11)	SMOC1
Peak_15457	chr2	193187857	193188647	-1.20582	0.0242509	Distal Intergenic	PCGEM1
Peak_20858	chr2	55051964	55052884	-1.20567	0.000885667	Promoter (1-2kb)	RTN4
Peak_2469	chr9	128689977	128691139	-1.20519	0.00537052	Promoter (<=1kb)	SET
Peak_22347	chr1	66301305	66301638	-1.20424	0.0383854	Intron (ENST00000329654.8/5142, intron 7 of 16)	PDE4B
Peak_6295	chr9	78028547	78031798	-1.20302	0.00800155	Promoter (<=1kb)	GNAQ
Peak_20826	chr11	9231204	9231600	-1.20254	0.0095635	Intron (ENST00000328194.8/23258, intron 1 of 22)	DENND5A
Peak_4558	chr6	81749645	81754247	-1.20214	0.00256001	Promoter (<=1kb)	LOC105377871
Peak_6287	chr10	21524105	21526068	-1.20167	0.0036484	Promoter (<=1kb)	SKIDA1
Peak_12155	chr13	108269392	108271190	-1.2016	0.000545095	Promoter (<=1kb)	TNFSF13B
Peak_29345	chr8	127759428	127759928	-1.20151	0.0196434	Distal Intergenic	CASC11
Peak_18557	chr1	41919839	41920231	-1.20125	0.0144493	Promoter (<=1kb)	HIVEP3
Peak_2561	chr1	16367136	16368982	-1.20008	0.00677038	Promoter (<=1kb)	SZRD1
Peak_27891	chr21	36431341	36431580	-1.19925	0.0175209	Promoter (<=1kb)	LOC105369301
Peak_1539	chr13	50079120	50083309	-1.19853	0.000165448	Promoter (<=1kb)	DLEU1
Peak_19540	chr8	38081541	38082230	-1.19696	0.00530416	Exon (ENST00000668779.1/ENST00000668779.1, exon 1 of 3)	ASH2L
Peak_11585	chr16	46789993	46790730	-1.19679	0.000244283	Promoter (<=1kb)	MYLK3
Peak_28938	chr10	129042727	129043191	-1.19631	0.020931	Distal Intergenic	LINC02667
Peak_5469	chr3	142026529	142028852	-1.1945	0.00194972	Promoter (<=1kb)	TFDP2
Peak_21486	chr7	366041	366677	-1.19436	0.0177801	Distal Intergenic	LOC442497
Peak_16224	chr5	100731707	100732209	-1.1943	0.0496778	Distal Intergenic	MIR548P
Peak_2862	chr5	32708735	32716602	-1.19365	5.90339e-07	Promoter (<=1kb)	NPR3
Peak_35051	chr3	169250080	169250528	-1.19316	0.0200052	Intron (ENST00000651503.2/2122, intron 2 of 16)	MECOM
Peak_28499	chr8	130682416	130683061	-1.19307	0.00416795	Distal Intergenic	ASAP1
Peak_4385	chr3	98901887	98902751	-1.19304	0.0152145	Promoter (<=1kb)	LOC105374002
Peak_20303	chr14	100065131	100066651	-1.19303	7.95905e-06	Promoter (<=1kb)	EVL
Peak_3329	chr7	120949315	120952202	-1.19214	0.00025882	Promoter (<=1kb)	ING3
Peak_16598	chr5	99027109	99027791	-1.1914	0.02965	Distal Intergenic	CHD1
Peak_4038	chr6	45422789	45425675	-1.1894	0.0017658	Promoter (<=1kb)	RUNX2
Peak_22917	chr7	100605224	100605905	-1.18772	0.0231989	Promoter (<=1kb)	PCOLCE
Peak_30218	chr6	3229731	3229991	-1.18638	0.0283986	Promoter (1-2kb)	LOC100422781
Peak_20723	chr7	42227734	42228472	-1.18461	0.0403574	Promoter (<=1kb)	GLI3
Peak_24614	chr14	52742002	52742592	-1.18354	0.00104298	Intron (ENST00000354586.5/6815, intron 1 of 10)	STYX
Peak_452	chr6	109091859	109096687	-1.18242	0.000172508	Promoter (<=1kb)	SESN1
Peak_25100	chr8	97259605	97260060	-1.18227	0.00744539	Distal Intergenic	TSPYL5
Peak_20763	chr14	95185567	95186218	-1.18127	0.00993131	3' UTR	CLMN
Peak_27493	chr8	55885346	55886106	-1.18095	0.000615519	Intron (ENST00000520220.6/4067, intron 1 of 12)	LYN
Peak_24387	chr17	49741463	49742895	-1.18061	0.00188346	Intron (ENST00000240364.7/81558, intron 1 of 7)	FAM117A
Peak_31701	chr12	118307288	118307913	-1.18048	0.0176277	Intron (ENST00000419821.6/51347, intron 1 of 20)	TAOK3
Peak_9631	chr17	63697895	63699743	-1.17991	0.00156534	Promoter (<=1kb)	LIMD2
Peak_4858	chr16	10876516	10880902	-1.1793	2.35659e-07	Promoter (<=1kb)	CIITA
Peak_225	chr1	186373371	186377087	-1.17803	0.0107513	Promoter (<=1kb)	ODR4
Peak_10717	chr3	24521043	24522833	-1.17774	0.000125344	Exon (ENST00000627154.2/644990, exon 3 of 3)	THRB-AS1
Peak_3760	chr19	37653785	37656783	-1.17553	0.00042187	Promoter (<=1kb)	ZFP30
Peak_24070	chr19	6772287	6772592	-1.17529	0.0494395	Promoter (<=1kb)	VAV1
Peak_3875	chr3	41198343	41199949	-1.17489	0.00245555	Promoter (<=1kb)	CTNNB1
Peak_6634	chr6	157020250	157022153	-1.17411	0.0248177	Promoter (<=1kb)	ARID1B
Peak_25678	chr9	98102137	98102463	-1.17394	0.0470594	Intron (ENST00000375098.7/9830, intron 2 of 6)	TRIM14
Peak_34493	chr1	8427751	8428281	-1.1731	0.0169169	Intron (ENST00000449895.5/102724552, intron 1 of 3)	RERE-AS1
Peak_4147	chr7	158827170	158830594	-1.17243	5.59632e-05	Promoter (<=1kb)	ESYT2
Peak_29110	chr2	164797561	164798073	-1.17242	0.026734	Intron (ENST00000375458.6/22837, intron 1 of 12)	COBLL1
Peak_58605	chr13	113854902	113855259	-1.17239	0.00280521	Intron (ENST00000327773.7/2621, intron 2 of 14)	GAS6
Peak_28313	chr2	105797111	105797560	-1.17142	0.0164312	Intron (ENST00000233154.9/8440, intron 1 of 4)	NCK2
Peak_8494	chr1	167720885	167723266	-1.17123	0.000541825	Promoter (<=1kb)	MPZL1
Peak_19037	chr9	123637494	123638131	-1.1708	0.0316808	Intron (ENST00000473039.5/57706, intron 7 of 17)	DENND1A
Peak_7701	chr11	128522496	128523369	-1.1688	0.0437799	Promoter (<=1kb)	MIR6090
Peak_20101	chr3	88030139	88030775	-1.16878	0.0195483	Distal Intergenic	CGGBP1
Peak_20066	chr1	174938445	174938955	-1.16867	0.0250349	Exon (ENST00000452442.5/101928696, exon 4 of 6)	RABGAP1L-AS1
Peak_23095	chr2	197255708	197256422	-1.16834	0.0219863	Intron (ENST00000282272.15/91526, intron 1 of 27)	ANKRD44-IT1
Peak_23	chr3	185932122	185938109	-1.16799	0.00629338	Promoter (<=1kb)	TRA2B
Peak_1004	chr6	109690048	109692003	-1.16763	0.0351832	Promoter (<=1kb)	AK9
Peak_5234	chr3	69384134	69386860	-1.16718	0.00994811	Promoter (<=1kb)	FRMD4B
Peak_19588	chr12	116172315	116172819	-1.16709	0.000541024	Intron (ENST00000281928.9/23389, intron 2 of 30)	MIR620
Peak_20656	chr12	94768605	94769324	-1.16653	0.00714464	Distal Intergenic	KRT19P2
Peak_60032	chr2	46015809	46016196	-1.16592	0.00171557	Intron (ENST00000306156.8/5581, intron 10 of 14)	PRKCE
Peak_12424	chr9	126516948	126517824	-1.1655	0.0130041	Promoter (<=1kb)	LOC105376276
Peak_5851	chr1	10693292	10694511	-1.16505	0.0329353	Promoter (<=1kb)	CASZ1
Peak_29480	chr4	77735152	77735418	-1.1643	0.00243421	Intron (ENST00000649644.1/246175, intron 8 of 11)	CNOT6L
Peak_29447	chr17	4934015	4934660	-1.16289	0.0417172	Promoter (<=1kb)	CHRNE
Peak_38017	chr7	111986728	111987080	-1.1616	0.0313201	Intron (ENST00000428084.6/9732, intron 6 of 52)	DOCK4
Peak_18567	chr6	81808776	81809718	-1.16002	0.0212698	Distal Intergenic	LINC01526
Peak_23040	chr11	128725731	128726435	-1.15983	0.0146892	Intron (ENST00000608303.5/2313, intron 1 of 6)	SENCR
Peak_29381	chr4	41362088	41362346	-1.15839	0.0101384	Promoter (1-2kb)	LIMCH1
Peak_25991	chr12	50242028	50242270	-1.15825	0.00592551	Intron (ENST00000394943.7/51474, intron 2 of 10)	LIMA1
Peak_23233	chr18	76467329	76468143	-1.15799	0.00042187	Intron (ENST00000443185.7/9658, intron 1 of 6)	ZNF516
Peak_26768	chr8	38442464	38442998	-1.15795	0.0271924	Intron (ENST00000649678.1/2260, intron 3 of 21)	FGFR1
Peak_15935	chr7	44977598	44979062	-1.1579	7.85275e-05	Promoter (<=1kb)	MYO1G
Peak_770	chr12	98643565	98646923	-1.15754	0.0215383	Promoter (<=1kb)	IKBIP
Peak_10562	chr2	177147957	177149126	-1.15698	0.0231356	Promoter (<=1kb)	LOC107985965
Peak_5510	chr1	62436748	62438812	-1.15667	0.0198985	Promoter (<=1kb)	USP1
Peak_31024	chr3	16481363	16481757	-1.15508	0.0427751	Promoter (1-2kb)	RFTN1
Peak_35704	chr3	111911539	111911711	-1.15365	0.0203932	Promoter (<=1kb)	PHLDB2
Peak_19085	chr13	112969304	112969893	-1.15365	0.0452197	Promoter (<=1kb)	MCF2L
Peak_10090	chr9	121121246	121123025	-1.15305	0.00480681	Promoter (<=1kb)	CNTRL
Peak_16361	chr4	98352452	98353215	-1.15023	0.000784962	Promoter (<=1kb)	RAP1GDS1
Peak_27450	chr20	10171906	10172191	-1.14975	0.0435269	Promoter (<=1kb)	LOC105372524
Peak_26187	chr2	112674433	112674704	-1.14814	0.0295458	Distal Intergenic	SLC20A1
Peak_28735	chr2	152166885	152167626	-1.14746	0.00214108	Intron (ENST00000263904.5/10254, intron 1 of 13)	STAM2
Peak_3276	chr6	142943687	142948354	-1.14729	0.00142139	Promoter (<=1kb)	HIVEP2-DT
Peak_4432	chr5	77490647	77492563	-1.147	0.00460388	Promoter (<=1kb)	WDR41
Peak_3430	chr14	76151330	76153283	-1.14667	0.00326801	Promoter (<=1kb)	GPATCH2L
Peak_15018	chr3	127547940	127548577	-1.14635	0.0264863	Distal Intergenic	LINC02034
Peak_14394	chr1	167328648	167329663	-1.14617	0.00090356	Promoter (<=1kb)	POU2F1
Peak_6335	chr20	48825964	48827985	-1.14548	0.0014502	Promoter (<=1kb)	PREX1
Peak_25438	chr12	116635168	116635881	-1.14364	0.0256933	Distal Intergenic	MAP1LC3B2
Peak_5864	chr11	72223906	72226020	-1.14316	0.00333203	Promoter (<=1kb)	INPPL1
Peak_13648	chr20	51799344	51800677	-1.14231	0.0164915	Promoter (<=1kb)	SALL4
Peak_1297	chr5	65479873	65483801	-1.14226	0.0447408	Promoter (<=1kb)	ADAMTS6
Peak_27118	chr2	46350310	46350684	-1.14166	0.0107868	Intron (ENST00000449347.5/2034, intron 3 of 6)	EPAS1
Peak_22102	chr1	27428533	27429316	-1.13894	0.00233414	5' UTR	GPR3
Peak_26611	chr10	118669196	118669787	-1.13867	0.0351676	Distal Intergenic	CACUL1
Peak_9135	chr12	130872040	130873464	-1.13845	0.031594	Promoter (<=1kb)	RAN
Peak_41415	chr4	75698760	75698925	-1.13805	0.0460159	Intron (ENST00000677583.1/9908, intron 1 of 11)	G3BP2
Peak_11769	chr11	129279689	129280593	-1.13773	0.000842334	Promoter (<=1kb)	ARHGAP32
Peak_1273	chr7	135508546	135511191	-1.13769	0.0137407	Promoter (<=1kb)	CNOT4
Peak_19106	chr1	198932322	198933301	-1.13763	0.0115849	Intron (ENST00000660348.1/100131234, intron 1 of 2)	MIR181A1HG
Peak_5698	chr14	32200367	32204587	-1.13676	0.0021478	Promoter (<=1kb)	RNU6-7
Peak_14637	chr2	45567242	45568631	-1.13658	0.000648201	Promoter (<=1kb)	SRBD1
Peak_34515	chr18	3061868	3062119	-1.13603	0.000155941	Distal Intergenic	MYOM1
Peak_13283	chr5	95619524	95620792	-1.13589	0.00476061	Promoter (<=1kb)	GPR150
Peak_15076	chr16	3151928	3153011	-1.13497	0.0146241	Distal Intergenic	CASP16P
Peak_25787	chr12	94435403	94436034	-1.13494	0.0113735	Intron (ENST00000397809.10/51134, intron 1 of 16)	CEP83
Peak_20707	chr9	93059279	93060101	-1.1348	0.00169341	Promoter (<=1kb)	SUSD3
Peak_20965	chr17	64986134	64986611	-1.13366	0.00588551	Distal Intergenic	AMZ2P1
Peak_15717	chr2	161136884	161137360	-1.13363	0.00737899	Promoter (<=1kb)	TANK
Peak_19055	chr18	22324093	22324772	-1.13276	0.0265173	Distal Intergenic	CTAGE1
Peak_1150	chr10	22001885	22004212	-1.13259	0.00933093	Promoter (<=1kb)	DNAJC1
Peak_23129	chr2	65301167	65301624	-1.13184	0.00564777	Distal Intergenic	SPRED2
Peak_16938	chr15	24772780	24773555	-1.13169	0.0465695	Intron (ENST00000651136.1/791114, intron 9 of 14)	SNRPN
Peak_5008	chr3	45689248	45691529	-1.13127	0.00347542	Promoter (<=1kb)	SACM1L
Peak_24433	chr15	57565274	57565805	-1.13054	0.0170165	Distal Intergenic	MYZAP
Peak_13058	chr15	79970526	79971614	-1.13011	0.000218419	Promoter (<=1kb)	BCL2A1
Peak_26970	chr1	51516432	51517163	-1.12876	0.00924707	Promoter (1-2kb)	EPS15-AS1
Peak_37948	chr7	26685383	26685658	-1.12855	0.0144278	Intron (ENST00000345317.7/8935, intron 10 of 12)	LINC02860
Peak_25367	chr2	85408410	85409130	-1.12804	0.0231989	Promoter (<=1kb)	CAPG
Peak_3937	chr7	27161729	27170031	-1.12509	0.0034069	Promoter (<=1kb)	HOXA10-AS
Peak_13491	chr7	122136684	122138310	-1.12501	0.024398	Intron (ENST00000679864.1/10157, intron 1 of 24)	AASS
Peak_38080	chr5	132420514	132421223	-1.12439	0.0176325	Promoter (<=1kb)	IRF1-AS1
Peak_23534	chr13	46125111	46125412	-1.12415	0.0440224	Intron (ENST00000663159.1/100509894, intron 1 of 2)	LCP1
Peak_11456	chr11	44305289	44306398	-1.12383	0.00712519	Intron (ENST00000652299.1/60529, intron 1 of 3)	ALX4
Peak_13912	chr3	25783613	25784371	-1.1235	0.0282754	Promoter (<=1kb)	NGLY1
Peak_29639	chr14	69625249	69625699	-1.12345	0.0453161	Intron (ENST00000342745.5/9766, intron 1 of 5)	SUSD6
Peak_23216	chr3	37072626	37073162	-1.12291	0.00501787	Exon (ENST00000336686.9/9209, exon 21 of 28)	LRRFIP2
Peak_15942	chr5	39274606	39275534	-1.12278	0.0107232	Promoter (<=1kb)	FYB1
Peak_25817	chr13	50078262	50078706	-1.12143	0.0273704	Intron (ENST00000621282.4/8847, intron 1 of 13)	DLEU2
Peak_8901	chr6	52577176	52578093	-1.12105	0.0308556	Promoter (<=1kb)	TRAM2-AS1
Peak_9407	chr20	1467067	1467797	-1.12102	0.0332103	Promoter (<=1kb)	NSFL1C
Peak_27650	chr12	50843046	50843373	-1.12069	0.03712	Promoter (<=1kb)	TMPRSS12
Peak_15137	chr12	42097798	42098517	-1.12063	0.00872038	Exon (ENST00000398675.8/283464, exon 6 of 8)	GXYLT1
Peak_13438	chr12	53617914	53619044	-1.12034	0.00190972	Exon (ENST00000648881.1/ENST00000648881.1, exon 6 of 7)	ATF7
Peak_25813	chr3	71702053	71702768	-1.11928	0.0188184	Intron (ENST00000647725.1/27086, intron 3 of 25)	FOXP1
Peak_19350	chr18	13800871	13801629	-1.117	0.0295458	Distal Intergenic	MC5R
Peak_5724	chr12	14364882	14368018	-1.11687	0.000450673	Promoter (<=1kb)	ATF7IP
Peak_4185	chr1	110034124	110035851	-1.11657	0.000299929	Promoter (<=1kb)	STRIP1
Peak_18097	chr1	246573463	246573812	-1.11493	0.0116376	Intron (ENST00000483271.1/163882, intron 1 of 7)	CNST
Peak_491	chr7	39565514	39567115	-1.11451	0.0440179	Promoter (<=1kb)	YAE1-DT
Peak_11847	chr15	55740756	55743529	-1.11365	0.000948052	Promoter (<=1kb)	PRTG
Peak_24393	chr3	172107301	172107550	-1.11299	0.0206485	Intron (ENST00000415807.7/64778, intron 1 of 25)	FNDC3B
Peak_27152	chr9	79583886	79584273	-1.11253	0.00736708	Intron (ENST00000376544.7/7091, intron 4 of 17)	TLE4
Peak_2412	chr9	124657974	124661196	-1.11058	0.0253283	Promoter (<=1kb)	MIR181A2HG
Peak_3901	chr4	124710272	124712729	-1.1095	0.00171557	Promoter (<=1kb)	ANKRD50
Peak_6045	chr2	65435440	65437169	-1.10948	0.0334774	Promoter (<=1kb)	LOC105369168
Peak_3127	chr13	24510778	24513487	-1.10946	7.85275e-05	Promoter (<=1kb)	PARP4
Peak_17878	chr16	57416772	57417527	-1.1093	0.0113088	Distal Intergenic	CCL17
Peak_17336	chr12	121095656	121096653	-1.10841	0.0344371	Exon (ENST00000623931.1/ENST00000623931.1, exon 1 of 1)	P2RX7
Peak_18602	chr5	96816314	96817596	-1.10829	0.00101434	Intron (ENST00000501338.5/51752, intron 3 of 3)	ERAP1
Peak_12460	chr6	146544793	146546322	-1.108	0.0102616	Promoter (<=1kb)	RAB32
Peak_16295	chr5	151020175	151021252	-1.10781	0.0219773	Promoter (<=1kb)	GPX3
Peak_20468	chr16	67993389	67994072	-1.1078	0.0341009	Promoter (<=1kb)	DPEP2
Peak_8762	chr12	39619308	39620910	-1.10766	0.0089166	Promoter (<=1kb)	ABCD2
Peak_41907	chr20	19840130	19840410	-1.10729	0.0458523	Intron (ENST00000432334.2/54453, intron 3 of 3)	RIN2
Peak_31377	chr3	69091457	69091911	-1.107	0.00539804	Intron (ENST00000273258.4/10550, intron 1 of 2)	ARL6IP5
Peak_24487	chr10	103693363	103693870	-1.10525	0.0268313	Promoter (<=1kb)	SH3PXD2A
Peak_20326	chr4	26886070	26886363	-1.10512	0.041375	Intron (ENST00000477474.3/57620, intron 2 of 14)	STIM2
Peak_24207	chr11	44574645	44575271	-1.10445	0.012975	Promoter (1-2kb)	CD82
Peak_20281	chr11	62555877	62557436	-1.10399	0.0135928	Promoter (<=1kb)	AHNAK
Peak_4878	chr10	929545	931821	-1.10317	0.00042395	Promoter (<=1kb)	LARP4B
Peak_16029	chr8	51961983	51963153	-1.10294	0.00254266	Intron (ENST00000521188.1/ENST00000521188.1, intron 1 of 1)	PCMTD1-DT
Peak_24197	chr5	80754851	80755872	-1.10186	0.0015051	Intron (ENST00000670357.1/4437, intron 12 of 24)	MSH3
Peak_30050	chr2	219057559	219058137	-1.1017	0.03949	Promoter (<=1kb)	MIR3131
Peak_19644	chr14	61719370	61720536	-1.10098	3.09936e-05	Exon (ENST00000337138.9/3091, exon 2 of 15)	HIF1A
Peak_17812	chr19	12482159	12483236	-1.10071	0.00439988	Promoter (1-2kb)	ZNF709
Peak_15112	chr4	100895424	100896107	-1.09958	0.028095	Distal Intergenic	LINC01218
Peak_19287	chr12	49089712	49090667	-1.09798	0.0227301	Promoter (<=1kb)	LOC105369759
Peak_17352	chr16	53071415	53072324	-1.0976	0.0016507	Intron (ENST00000447540.6/80205, intron 1 of 38)	CHD9
Peak_2757	chr3	50617150	50618725	-1.09718	7.95844e-05	Promoter (<=1kb)	MAPKAPK3
Peak_27176	chr12	122889801	122890084	-1.09514	0.0217237	Promoter (<=1kb)	VPS37B
Peak_71	chr1	186828563	186831153	-1.09453	0.0304331	Promoter (<=1kb)	PLA2G4A
Peak_25199	chr3	149532615	149533039	-1.09425	0.00410474	Intron (ENST00000360632.8/25937, intron 4 of 6)	WWTR1
Peak_2998	chr1	173866204	173869604	-1.09407	0.00174354	Promoter (<=1kb)	GAS5
Peak_5513	chr12	9865001	9870715	-1.09363	2.10695e-05	Promoter (<=1kb)	CLEC2B
Peak_4617	chr11	36375829	36378645	-1.09358	0.0152469	Promoter (<=1kb)	PRR5L
Peak_27055	chr20	63567624	63568028	-1.09321	0.0244044	Promoter (<=1kb)	HELZ2
Peak_2151	chr6	109007489	109010549	-1.09234	4.83415e-05	Promoter (<=1kb)	SESN1
Peak_8557	chr7	151632376	151633552	-1.09226	0.0220142	Promoter (<=1kb)	PRKAG2
Peak_11116	chr13	20702294	20703700	-1.08982	0.00743849	Promoter (<=1kb)	IL17D
Peak_17262	chr8	69942526	69943180	-1.08901	0.0487695	Exon (ENST00000424643.3/ENST00000424643.3, exon 1 of 3)	SLCO5A1
Peak_36288	chr20	43949925	43950239	-1.08822	0.0455048	Intron (ENST00000341197.9/84969, intron 1 of 8)	TOX2
Peak_5990	chr2	68734341	68738612	-1.08718	0.000190248	Promoter (<=1kb)	ARHGAP25
Peak_21356	chr7	102140995	102141576	-1.08567	0.0189661	Intron (ENST00000437600.9/1523, intron 8 of 22)	CUX1
Peak_3160	chr6	7106577	7109986	-1.08491	0.000541409	Promoter (<=1kb)	RREB1
Peak_1307	chr2	181456380	181461986	-1.08464	0.00690865	Promoter (<=1kb)	ITGA4
Peak_16288	chr13	41006951	41007440	-1.08431	0.0249798	Intron (ENST00000239882.7/1997, intron 1 of 8)	ELF1
Peak_29431	chr14	31410031	31410707	-1.08351	0.00687989	Intron (ENST00000543095.7/25938, intron 1 of 35)	HEATR5A-DT
Peak_6696	chr9	126860027	126862821	-1.08311	0.00082725	Promoter (<=1kb)	ZBTB34
Peak_15680	chr4	159400701	159401747	-1.08263	0.0107498	Exon (ENST00000502846.1/ENST00000502846.1, exon 2 of 2)	RAPGEF2
Peak_17779	chr7	101740880	101741533	-1.08216	0.00142143	Distal Intergenic	CUX1
Peak_25842	chr10	15313641	15314082	-1.08073	0.0103529	Intron (ENST00000378116.9/221061, intron 1 of 7)	FAM171A1
Peak_11560	chr21	16193905	16197527	-1.08066	0.000545095	Promoter (<=1kb)	MIR99AHG
Peak_2864	chr12	120580687	120582232	-1.08049	0.0210074	Promoter (<=1kb)	POP5
Peak_34501	chr12	32897842	32898030	-1.08007	0.00865938	Promoter (1-2kb)	PKP2
Peak_4470	chr9	3526103	3529664	-1.0798	6.87387e-05	Promoter (<=1kb)	RFX3
Peak_14190	chr1	67766305	67766800	-1.07966	0.0122432	Intron (ENST00000370982.4/55970, intron 2 of 3)	GNG12-AS1
Peak_2936	chr1	84298077	84299647	-1.07933	0.0358617	Promoter (<=1kb)	SAMD13
Peak_23466	chr22	42439688	42440065	-1.0792	0.0465638	Promoter (1-2kb)	LOC101927344
Peak_10532	chr10	22325695	22326661	-1.07907	0.00740509	Promoter (<=1kb)	COMMD3-BMI1
Peak_15512	chr12	53324203	53325551	-1.07897	0.0273964	Promoter (<=1kb)	AAAS
Peak_35019	chr14	70987793	70988232	-1.0777	0.0344421	Intron (ENST00000554879.5/22990, intron 6 of 9)	PCNX1
Peak_5845	chr4	67543343	67546298	-1.07762	0.000104569	Promoter (<=1kb)	CENPC
Peak_230	chr1	241638747	241640407	-1.07679	0.00757312	Promoter (<=1kb)	CHML
Peak_22329	chr6	41938421	41939648	-1.0759	0.000362468	Promoter (<=1kb)	CCND3
Peak_23003	chr3	113748778	113749193	-1.07471	0.0215383	Promoter (1-2kb)	ATP6V1A
Peak_30551	chr2	135743893	135744309	-1.0745	0.0151489	Promoter (1-2kb)	UBXN4
Peak_14762	chr3	179346326	179346757	-1.07304	0.0249798	Promoter (<=1kb)	MFN1
Peak_5431	chr11	101914373	101916222	-1.07224	0.0342372	Promoter (<=1kb)	CEP126
Peak_11211	chr14	61750714	61751580	-1.07145	0.0122031	Promoter (<=1kb)	HIF1A-AS3
Peak_30	chr8	116754577	116756554	-1.07093	0.0200198	Promoter (<=1kb)	EIF3H
Peak_9131	chr11	75351790	75353272	-1.06917	0.0125618	Promoter (<=1kb)	ARRB1
Peak_30951	chr6	15403886	15404487	-1.06867	0.00658995	Intron (ENST00000341776.7/3720, intron 2 of 17)	JARID2
Peak_15968	chr6	90284092	90286070	-1.06601	0.00191615	Intron (ENST00000257749.9/60468, intron 1 of 8)	LOC105377891
Peak_1397	chr1	162497154	162498961	-1.06482	0.00173313	Promoter (<=1kb)	UHMK1
Peak_40607	chr17	44887915	44888245	-1.06462	0.0135482	Intron (ENST00000426333.7/9343, intron 2 of 27)	EFTUD2
Peak_22397	chr17	49740001	49740273	-1.06438	0.0103529	Intron (ENST00000240364.7/81558, intron 1 of 7)	FAM117A
Peak_7584	chr6	25991712	25993353	-1.06277	0.03949	Exon (ENST00000658335.1/ENST00000658335.1, exon 1 of 2)	H1-1
Peak_21690	chr8	100471944	100472369	-1.06275	0.019903	Distal Intergenic	LOC105375670
Peak_6001	chr3	71584178	71585828	-1.06192	0.00172103	Promoter (<=1kb)	FOXP1
Peak_11231	chr12	124921338	124922534	-1.06174	0.000396504	Distal Intergenic	UBC
Peak_38719	chr2	117815735	117815987	-1.06048	0.0265237	Promoter (<=1kb)	DDX18
Peak_2186	chr5	72847848	72849978	-1.06024	0.00124428	Promoter (<=1kb)	TNPO1
Peak_33418	chr6	152485832	152486098	-1.05855	0.0207686	Intron (ENST00000423061.6/23345, intron 12 of 145)	SYNE1
Peak_18160	chr5	143353693	143354492	-1.05774	0.000700867	Intron (ENST00000343796.6/2908, intron 2 of 8)	NR3C1
Peak_9397	chr2	74834060	74836840	-1.05722	0.00480048	Promoter (<=1kb)	HK2
Peak_19060	chr1	8395505	8396097	-1.05688	0.0258129	Intron (ENST00000337907.7/473, intron 13 of 23)	RERE
Peak_39443	chr7	29337178	29337858	-1.05623	0.00724683	Promoter (1-2kb)	CHN2
Peak_36239	chr6	7112453	7112999	-1.05623	0.0389337	Intron (ENST00000379933.7/6239, intron 1 of 11)	RREB1
Peak_28238	chr3	30604549	30604876	-1.05617	0.00162023	Promoter (1-2kb)	TGFBR2
Peak_14340	chr5	52944953	52945533	-1.05503	0.0158066	3' UTR	ITGA1
Peak_21554	chr6	166657137	166657994	-1.05483	0.00653723	Intron (ENST00000510118.5/6196, intron 3 of 22)	RPS6KA2
Peak_29553	chr11	70397638	70398425	-1.0547	0.0364081	Promoter (<=1kb)	CTTN
Peak_19018	chr13	77324154	77324594	-1.05391	0.0169923	Intron (ENST00000682321.1/23077, intron 1 of 84)	MYCBP2
Peak_5290	chr17	55419948	55421924	-1.0536	0.0212513	Promoter (<=1kb)	MMD
Peak_29503	chr9	71742029	71742295	-1.05325	0.0155245	Intron (ENST00000377044.9/23670, intron 4 of 23)	CEMIP2
Peak_16360	chr22	46592914	46593565	-1.05303	0.00912433	Intron (ENST00000447351.5/23151, intron 1 of 2)	GRAMD4
Peak_13115	chr1	9626419	9627221	-1.05279	0.0395765	Distal Intergenic	TMEM201
Peak_7827	chr6	27824358	27825671	-1.05266	0.0222202	Promoter (<=1kb)	H4C11
Peak_60979	chr6	141254177	141254560	-1.05118	0.0463877	Distal Intergenic	LOC105378029
Peak_11375	chr14	32897021	32897998	-1.05063	0.00492237	Distal Intergenic	NPAS3
Peak_28714	chr10	63262529	63263098	-1.05055	0.00276382	Intron (ENST00000399262.7/221037, intron 3 of 25)	JMJD1C
Peak_26190	chr2	128279866	128280594	-1.0484	0.00400774	Intron (ENST00000469019.1/9394, intron 1 of 2)	HS6ST1
Peak_19739	chr6	113872983	113873650	-1.04834	0.0454011	Promoter (<=1kb)	MROCKI
Peak_14903	chr9	113886099	113886864	-1.04747	0.0408066	Intron (ENST00000374126.9/114991, intron 1 of 14)	ZNF618
Peak_11741	chr7	69824172	69825053	-1.04698	0.0101384	Promoter (<=1kb)	AUTS2
Peak_16031	chr11	120715087	120715537	-1.04698	0.017341	Intron (ENST00000638419.1/2900, intron 3 of 20)	LOC107984400
Peak_14633	chr6	144334397	144334874	-1.04575	0.00206173	Intron (ENST00000433557.1/7402, intron 2 of 2)	UTRN
Peak_31880	chr16	11768744	11769303	-1.04457	0.000702974	Promoter (<=1kb)	ZC3H7A
Peak_2939	chr11	17276040	17278172	-1.04438	0.00636117	Promoter (<=1kb)	NUCB2
Peak_14824	chr12	98397205	98397878	-1.04325	0.0432342	Distal Intergenic	SLC9A7P1
Peak_19228	chr10	35379540	35380123	-1.04322	0.000712907	Intron (ENST00000490012.6/219771, intron 6 of 9)	CCNY
Peak_24500	chr16	75064673	75065790	-1.04262	0.00256001	Intron (ENST00000335325.9/84937, intron 1 of 4)	ZNRF1
Peak_22244	chr6	36038359	36038828	-1.04178	0.0425286	Intron (ENST00000622903.4/1432, intron 1 of 6)	MAPK14
Peak_5231	chr12	21656206	21658200	-1.04177	4.97839e-05	Promoter (<=1kb)	GYS2
Peak_4535	chr9	79571851	79574558	-1.04148	0.0123131	Promoter (<=1kb)	TLE4
Peak_23765	chr2	25592134	25592506	-1.041	0.0195149	Intron (ENST00000495466.6/1838, intron 5 of 18)	DTNB
Peak_38548	chr1	92859205	92859604	-1.04073	0.0334166	Intron (ENST00000615519.4/388650, intron 2 of 4)	DIPK1A
Peak_23493	chr5	56838661	56838965	-1.03974	0.0445791	Intron (ENST00000399503.4/4214, intron 1 of 19)	MAP3K1
Peak_1135	chr5	78293603	78296121	-1.0387	0.009239	Promoter (<=1kb)	AP3B1
Peak_3229	chr4	18019970	18023237	-1.0386	0.00725567	Promoter (<=1kb)	LCORL
Peak_632	chr17	61862362	61864231	-1.03825	0.0210074	Promoter (<=1kb)	BRIP1
Peak_14669	chr18	50819398	50820462	-1.0377	0.0217461	Promoter (<=1kb)	MRO
Peak_33580	chr4	140070452	140070795	-1.03749	0.0307197	Intron (ENST00000509479.6/55534, intron 1 of 4)	LOC101927516
Peak_3401	chr3	18422365	18426951	-1.03726	0.000784962	Promoter (<=1kb)	SATB1
Peak_23505	chr12	62812867	62813517	-1.03714	0.0474218	Intron (ENST00000228705.7/57460, intron 2 of 9)	PPM1H
Peak_19581	chr6	151764405	151764971	-1.03702	0.0284928	Intron (ENST00000473497.5/2099, intron 2 of 2)	ESR1
Peak_25712	chr5	81233085	81233837	-1.03689	0.0118232	Promoter (<=1kb)	CKMT2
Peak_7270	chr3	138328629	138330297	-1.03641	0.00605809	Promoter (<=1kb)	NME9
Peak_480	chr2	202265326	202268128	-1.0364	0.0047282	Promoter (<=1kb)	NOP58
Peak_11051	chr1	154352225	154353375	-1.03634	0.0313522	Distal Intergenic	ATP8B2
Peak_31400	chr7	22147161	22147503	-1.03632	0.0188184	Promoter (1-2kb)	RAPGEF5
Peak_14731	chr19	14688944	14689676	-1.03543	0.0224784	Promoter (<=1kb)	ZNF333
Peak_217	chr1	212034320	212037243	-1.03542	0.0359284	Promoter (<=1kb)	INTS7
Peak_14341	chr6	109515691	109516372	-1.0348	0.0304089	Exon (ENST00000424296.7/221264, exon 31 of 41)	AK9
Peak_28976	chr17	2215499	2216072	-1.0334	0.0268954	Promoter (1-2kb)	SMG6
Peak_33538	chr10	72088695	72089166	-1.03303	0.0324515	Promoter (<=1kb)	SPOCK2
Peak_7942	chr5	177453875	177456460	-1.03299	0.0110609	5' UTR	DBN1
Peak_348	chr5	150409717	150412966	-1.03264	0.0031244	Promoter (<=1kb)	CD74
Peak_34159	chr4	101306405	101306708	-1.03255	0.0248177	Intron (ENST00000512215.5/5530, intron 1 of 7)	MIR1255A
Peak_4682	chr1	165827482	165829756	-1.03231	0.00480048	Promoter (<=1kb)	TMCO1
Peak_7968	chr20	2651482	2652454	-1.03159	0.0456766	Promoter (<=1kb)	NOP56
Peak_38516	chr13	46124735	46125045	-1.03027	0.0365463	Intron (ENST00000663159.1/100509894, intron 1 of 2)	LCP1
Peak_24431	chr14	101824624	101825052	-1.02976	0.0167654	Promoter (<=1kb)	PPP2R5C
Peak_31815	chr1	61255770	61255995	-1.02974	0.0122031	Intron (ENST00000371191.5/4774, intron 2 of 10)	NFIA-AS1
Peak_7937	chr22	39348980	39349874	-1.02788	0.0164759	Promoter (<=1kb)	SYNGR1
Peak_3285	chr10	67763418	67765210	-1.02737	0.0283566	Promoter (<=1kb)	CTNNA3
Peak_736	chr15	34100453	34103012	-1.02694	0.000489663	Promoter (<=1kb)	PGBD4
Peak_7532	chr6	118649938	118651652	-1.02669	0.0197262	Promoter (<=1kb)	CEP85L
Peak_9506	chr6	166955411	166957434	-1.02617	0.0126941	Promoter (<=1kb)	RNASET2
Peak_5710	chr1	111619810	111621576	-1.02533	0.00376815	Promoter (<=1kb)	RAP1A
Peak_8140	chr3	159839435	159841549	-1.02507	0.00107123	Promoter (<=1kb)	SCHIP1
Peak_1629	chr9	3523739	3525982	-1.02475	0.0101384	Promoter (<=1kb)	RFX3
Peak_33358	chr2	61534928	61535404	-1.02401	0.0342135	Promoter (<=1kb)	XPO1
Peak_5345	chr7	148982509	148984489	-1.02392	0.0408164	Promoter (<=1kb)	RNY3
Peak_13241	chr17	78774401	78775849	-1.02371	5.08243e-05	Intron (ENST00000591455.5/9267, intron 1 of 12)	CYTH1
Peak_15104	chr4	40856613	40857419	-1.02216	0.0458862	Promoter (<=1kb)	APBB2
Peak_26668	chr1	236415936	236416313	-1.02179	0.0179923	Intron (ENST00000637660.1/128178, intron 3 of 5)	EDARADD
Peak_7117	chr1	53014314	53015942	-1.02132	0.0119564	Promoter (<=1kb)	SCP2
Peak_25225	chr11	110148087	110148730	-1.02101	0.0408066	Intron (ENST00000278590.8/85463, intron 2 of 5)	ZC3H12C
Peak_35616	chr7	87873895	87874430	-1.02042	0.0439055	Promoter (1-2kb)	DBF4
Peak_20969	chr1	181128849	181129335	-1.02023	0.0257241	Distal Intergenic	IER5
Peak_16590	chr10	13382775	13383732	-1.02004	0.0270302	Distal Intergenic	LOC105376419
Peak_21024	chr3	125051568	125052636	-1.01923	0.0225947	Intron (ENST00000311127.9/57493, intron 1 of 16)	HEG1
Peak_21599	chr18	58135697	58135939	-1.01871	0.030767	Intron (ENST00000400345.8/23327, intron 1 of 30)	NEDD4L
Peak_21371	chr12	47307024	47307991	-1.0183	0.00536409	Distal Intergenic	LOC105369746
Peak_30081	chr2	85134509	85135003	-1.01774	0.0334166	Promoter (<=1kb)	TCF7L1
Peak_17264	chr18	75455483	75456646	-1.01726	0.00819483	Promoter (<=1kb)	LOC107985177
Peak_3227	chr5	43018797	43020895	-1.01569	0.0141168	Promoter (<=1kb)	LOC105374748
Peak_28587	chr9	126490358	126490685	-1.0153	0.041575	Intron (ENST00000361171.8/89853, intron 9 of 9)	MVB12B
Peak_3544	chr9	76458827	76460588	-1.01526	0.00615325	Promoter (<=1kb)	LOC105376095
Peak_4589	chr12	116818268	116819934	-1.01501	0.0316006	Intron (ENST00000392549.7/84900, intron 7 of 11)	RNFT2
Peak_4601	chr13	28136866	28141133	-1.01501	0.000138589	Promoter (<=1kb)	PAN3
Peak_24511	chr20	41086616	41087219	-1.01496	0.0100762	Intron (ENST00000361337.3/7150, intron 8 of 20)	TOP1
Peak_1164	chr12	8948118	8951336	-1.01297	0.00842023	Promoter (<=1kb)	KLRG1
Peak_22368	chr2	218257540	218257855	-1.01271	0.0342135	Promoter (1-2kb)	GPBAR1
Peak_9866	chr17	49676482	49678223	-1.01132	0.0293761	Promoter (<=1kb)	SPOP
Peak_7586	chr7	11830607	11832645	-1.01033	0.0188184	Promoter (<=1kb)	THSD7A
Peak_26502	chr4	80058053	80058763	-1.00956	0.0119147	Intron (ENST00000403729.7/118429, intron 3 of 16)	ANTXR2
Peak_22426	chr6	87645074	87645690	-1.00898	0.0459167	Intron (ENST00000546266.5/23595, intron 12 of 18)	ORC3
Peak_179	chr6	34886912	34891062	-1.00831	3.2419e-05	Promoter (<=1kb)	ANKS1A
Peak_993	chr1	97919064	97922068	-1.00829	0.0010111	Promoter (<=1kb)	DPYD
Peak_16586	chr1	42319404	42320410	-1.00775	0.00809703	Intron (ENST00000372572.5/22887, intron 2 of 14)	FOXJ3
Peak_30521	chr11	46118109	46118722	-1.00756	0.00910805	Promoter (1-2kb)	PHF21A
Peak_27334	chr2	159753949	159754490	-1.00752	0.003689	Promoter (1-2kb)	MARCHF7
Peak_27251	chr15	72226879	72227110	-1.00718	0.0398513	Promoter (1-2kb)	PKM
Peak_19668	chr3	124834975	124835740	-1.00681	0.0160816	Promoter (1-2kb)	ITGB5
Peak_10189	chr19	50357116	50358175	-1.00583	0.0125608	Promoter (<=1kb)	NR1H2
Peak_41593	chr17	83199287	83199768	-1.00559	0.0496388	Intron (ENST00000651869.1/101929650, intron 3 of 3)	LOC101929650
Peak_18619	chr18	9184889	9185475	-1.00439	0.00421736	Intron (ENST00000578850.1/23253, intron 1 of 1)	ANKRD12
Peak_25320	chr6	125811070	125811402	-1.00352	0.0446468	Promoter (<=1kb)	NCOA7
Peak_29410	chr10	11684614	11685471	-1.00351	0.0329118	Distal Intergenic	ECHDC3
Peak_19179	chr1	15697077	15697577	-1.00335	0.014617	Intron (ENST00000375799.8/23207, intron 1 of 19)	PLEKHM2
Peak_7728	chr1	173202102	173206319	-1.00279	0.00517964	Promoter (<=1kb)	TNFSF4
Peak_23226	chr7	66206717	66208095	-1.00272	0.00051562	Promoter (1-2kb)	TPST1
Peak_561	chr2	54557265	54561625	-1.00158	0.00642982	Promoter (<=1kb)	SPTBN1
Peak_28584	chr7	134669871	134670218	-1.00156	0.0381798	Intron (ENST00000418040.5/669, intron 3 of 3)	BPGM
Peak_356	chr2	121735351	121736932	-1.00115	0.0085384	Promoter (<=1kb)	NIFK
Peak_13883	chr11	73528485	73529292	-0.999729	0.0220142	Intron (ENST00000356467.5/23201, intron 1 of 7)	FAM168A
Peak_9606	chr12	12725712	12727255	-0.999703	0.00382848	Promoter (<=1kb)	DDX47
Peak_7349	chr3	185822035	185825050	-0.999594	0.0323822	Promoter (<=1kb)	IGF2BP2
Peak_29362	chr3	30631734	30631990	-0.999177	0.0203408	Promoter (<=1kb)	TGFBR2
Peak_13028	chr15	91853925	91854987	-0.99868	0.0196434	Promoter (<=1kb)	SLCO3A1
Peak_16037	chr15	74788052	74790827	-0.998563	0.000597571	Promoter (<=1kb)	MIR4513
Peak_20745	chr8	102898386	102899265	-0.997884	0.00681304	Intron (ENST00000659614.1/100506753, intron 2 of 5)	AZIN1
Peak_18489	chr4	147057337	147057982	-0.995231	0.0106083	Distal Intergenic	LOC105377476
Peak_21715	chr14	75542608	75543488	-0.995215	0.0197931	Intron (ENST00000555795.1/10538, intron 2 of 2)	BATF
Peak_28562	chr20	57619249	57619859	-0.994901	0.0121371	Promoter (<=1kb)	ZBP1
Peak_23419	chr5	148401960	148402249	-0.993044	0.0237525	Exon (ENST00000296701.10/81545, exon 4 of 21)	FBXO38
Peak_41227	chr11	22828283	22828752	-0.992931	0.00337481	Promoter (<=1kb)	SVIP
Peak_15663	chr11	122157219	122158077	-0.992883	0.0122063	Promoter (<=1kb)	MIR100HG
Peak_6673	chr11	122882936	122883946	-0.992759	0.0215101	Promoter (<=1kb)	JHY
Peak_8829	chr17	32141191	32142392	-0.992392	0.0108715	Promoter (<=1kb)	RHOT1
Peak_531	chr6	21593234	21599438	-0.991465	0.00507472	Promoter (<=1kb)	LOC107986579
Peak_17062	chr11	48067003	48067515	-0.991403	0.0294283	Intron (ENST00000613246.4/5795, intron 1 of 24)	PTPRJ
Peak_11397	chr17	8137742	8139772	-0.9907	0.00291637	Distal Intergenic	PER1
Peak_9502	chr4	41359878	41362043	-0.990324	0.00755243	Promoter (<=1kb)	LIMCH1
Peak_7899	chr10	21526177	21528977	-0.989736	0.00836442	Promoter (<=1kb)	SKIDA1
Peak_17068	chr16	68469776	68471073	-0.989699	0.0412068	Distal Intergenic	SMPD3
Peak_13382	chr2	25251214	25252272	-0.989412	0.0349565	Promoter (<=1kb)	DNMT3A
Peak_22260	chr1	67635230	67635812	-0.987715	0.0452471	Distal Intergenic	GADD45A
Peak_12222	chr19	6739752	6741564	-0.984953	0.0115543	Promoter (<=1kb)	TRIP10
Peak_5721	chr12	109899835	109901659	-0.983534	0.00441295	Promoter (<=1kb)	TCHP
Peak_12116	chr18	47930665	47932134	-0.98065	0.000541825	Promoter (<=1kb)	SMAD2
Peak_9045	chr8	90984123	90985258	-0.980122	0.00915035	Promoter (<=1kb)	C8orf88
Peak_2644	chr4	74037678	74039794	-0.979646	0.00274158	Promoter (<=1kb)	CXCL3
Peak_15480	chr4	139266332	139267050	-0.979438	0.0240525	3' UTR	MGARP
Peak_6300	chr1	230066086	230066891	-0.979402	0.0151489	Promoter (<=1kb)	GALNT2
Peak_17253	chr16	84294276	84295259	-0.979271	0.0308982	Promoter (<=1kb)	WFDC1
Peak_30708	chr1	26237822	26238023	-0.978179	0.0389329	Intron (ENST00000640292.2/64793, intron 1 of 12)	CEP85
Peak_22096	chr2	182866266	182867616	-0.977564	0.0303492	Promoter (<=1kb)	FRZB
Peak_2065	chr5	96933023	96938061	-0.976925	7.67347e-05	Promoter (<=1kb)	LNPEP
Peak_8689	chr3	15860014	15861316	-0.976868	0.00378651	Promoter (<=1kb)	ANKRD28
Peak_42000	chr10	114498959	114499168	-0.976216	0.0313201	Intron (ENST00000392952.7/3983, intron 1 of 17)	ABLIM1
Peak_267	chr3	167733435	167736788	-0.975147	0.00309827	Promoter (<=1kb)	PDCD10
Peak_1396	chr11	94972342	94974340	-0.974772	0.0178529	Promoter (<=1kb)	CWC15
Peak_22484	chr20	4811412	4812432	-0.973737	0.00910805	Intron (ENST00000379400.8/9770, intron 2 of 11)	RASSF2
Peak_10514	chr3	136750188	136751780	-0.972995	0.0325088	Promoter (<=1kb)	STAG1
Peak_1134	chr12	54280647	54284635	-0.972685	0.00375694	Promoter (<=1kb)	HNRNPA1
Peak_1088	chr19	13098296	13103733	-0.972048	0.000758491	Promoter (<=1kb)	LYL1
Peak_630	chr7	124928848	124930380	-0.971889	0.026034	Promoter (<=1kb)	LOC100506664
Peak_4856	chr7	143288307	143290094	-0.971647	0.0185138	Promoter (<=1kb)	CASP2
Peak_13301	chr6	162726691	162728528	-0.971435	0.00181865	Promoter (<=1kb)	PACRG
Peak_2182	chr2	237692164	237695728	-0.970969	0.0171686	Promoter (<=1kb)	LRRFIP1
Peak_13651	chr4	169079630	169080813	-0.970958	5.57733e-05	Distal Intergenic	CBR4
Peak_6856	chr18	31682786	31686659	-0.969135	1.03303e-05	Promoter (<=1kb)	B4GALT6
Peak_3694	chr5	127517570	127518889	-0.969125	0.0178885	Promoter (<=1kb)	PRRC1
Peak_45773	chr15	59354626	59354939	-0.967886	0.00588904	Intron (ENST00000288235.9/4643, intron 1 of 27)	MYO1E
Peak_2235	chr13	36344501	36347090	-0.966411	0.00375577	Promoter (<=1kb)	SPART-AS1
Peak_46117	chr20	41031489	41031973	-0.96625	0.0197262	Intron (ENST00000361337.3/7150, intron 2 of 20)	TOP1
Peak_16964	chr18	13611343	13612478	-0.965753	0.0157827	Promoter (<=1kb)	LDLRAD4
Peak_31942	chr14	73743214	73743683	-0.964441	0.0346654	Intron (ENST00000394071.6/91748, intron 1 of 11)	MIDEAS
Peak_21000	chr13	97227076	97227883	-0.964011	0.0201928	Intron (ENST00000397601.5/10150, intron 1 of 6)	MBNL2
Peak_6553	chr17	29760058	29761492	-0.962574	0.0173274	Promoter (<=1kb)	SSH2
Peak_22388	chr12	116319566	116320072	-0.962499	0.0146346	Distal Intergenic	MED13L
Peak_5120	chr18	34976346	34979670	-0.962245	0.0145369	Promoter (<=1kb)	MAPRE2
Peak_23400	chr12	65925479	65926340	-0.961119	0.0106639	Intron (ENST00000403681.7/8091, intron 3 of 4)	HMGA2-AS1
Peak_22306	chr14	89615201	89616101	-0.960557	0.0360414	Intron (ENST00000345097.8/1112, intron 1 of 6)	FOXN3
Peak_5996	chr17	48584950	48591196	-0.960491	0.00580498	Promoter (<=1kb)	HOXB3
Peak_1669	chr8	119873638	119876418	-0.960025	0.0018433	Promoter (<=1kb)	DEPTOR
Peak_21280	chr8	140955145	140956076	-0.959703	0.0162208	Promoter (<=1kb)	PTK2
Peak_29038	chr5	50711511	50712058	-0.957586	0.030711	Intron (ENST00000503790.6/79668, intron 3 of 6)	PARP8
Peak_1936	chr4	16081563	16084881	-0.957205	0.0007958	Promoter (<=1kb)	PROM1
Peak_27191	chr2	64260627	64261171	-0.955744	0.044423	Distal Intergenic	LOC100507006
Peak_24310	chr17	2624296	2624899	-0.953211	0.00376815	Intron (ENST00000576586.5/5048, intron 1 of 4)	PAFAH1B1
Peak_2694	chr5	126777136	126779423	-0.951982	0.0131093	Promoter (<=1kb)	LMNB1
Peak_5026	chr1	202805046	202809184	-0.951966	4.07279e-05	Promoter (<=1kb)	KDM5B
Peak_9878	chr11	30583897	30587134	-0.951896	0.00407842	Promoter (<=1kb)	MPPED2-AS1
Peak_3422	chr13	94548545	94550561	-0.951331	0.00709921	Distal Intergenic	TGDS
Peak_14414	chr18	58194917	58195910	-0.950874	0.0161391	Promoter (<=1kb)	LOC105372143
Peak_4925	chr7	79451448	79455008	-0.950149	0.0263664	Promoter (<=1kb)	MAGI2-AS3
Peak_4606	chr22	40461802	40463925	-0.949922	0.000834958	Promoter (<=1kb)	MRTFA
Peak_27408	chr3	100602865	100603662	-0.948462	0.00184224	Distal Intergenic	ADGRG7
Peak_5786	chr5	36605900	36607597	-0.947876	0.0107151	Promoter (<=1kb)	SLC1A3
Peak_26856	chr10	103184541	103185149	-0.947814	0.0124415	Intron (ENST00000675164.1/22978, intron 2 of 19)	NT5C2
Peak_5302	chr10	69123185	69125581	-0.946909	0.0200429	Promoter (<=1kb)	VPS26A
Peak_14830	chr8	97639491	97640650	-0.946844	0.0185683	Distal Intergenic	MTDH
Peak_35593	chr6	15250290	15250453	-0.94592	0.0186802	Promoter (1-2kb)	JARID2
Peak_9062	chr14	37197234	37198737	-0.944626	0.0347256	Promoter (<=1kb)	MIPOL1
Peak_31537	chr3	71402797	71403124	-0.944599	0.0307954	Intron (ENST00000649528.3/27086, intron 3 of 20)	FOXP1
Peak_9051	chr2	18559196	18561134	-0.944459	0.0117328	Promoter (<=1kb)	RDH14
Peak_17816	chr14	100849240	100849884	-0.943957	0.0199393	Exon (ENST00000522771.9/55384, exon 7 of 7)	MIR770
Peak_15416	chr1	182614512	182616172	-0.943333	0.0174037	Promoter (<=1kb)	LINC01686
Peak_138	chr5	36874489	36879415	-0.943326	0.0010831	Promoter (<=1kb)	NIPBL
Peak_10286	chr22	43013422	43015257	-0.942852	0.00865938	Promoter (<=1kb)	PACSIN2
Peak_5645	chr3	69079056	69080441	-0.94274	0.00514827	Promoter (<=1kb)	UBA3
Peak_20909	chr11	58575403	58575937	-0.941641	0.0316567	Promoter (<=1kb)	LPXN
Peak_498	chr14	20609438	20611120	-0.941558	0.0313322	Promoter (<=1kb)	RNASE11
Peak_19481	chr1	225999740	226000462	-0.940848	0.0440356	Promoter (<=1kb)	SDE2
Peak_6724	chr4	15652709	15655427	-0.939706	0.018608	Promoter (<=1kb)	FBXL5
Peak_9982	chr3	134249302	134250602	-0.939092	0.0413902	Promoter (<=1kb)	RYK
Peak_27080	chr7	26279364	26279533	-0.939074	0.0459074	Distal Intergenic	SNX10
Peak_24063	chr17	1566581	1567007	-0.938966	0.0497105	Distal Intergenic	PITPNA
Peak_1607	chr6	63635050	63638007	-0.938855	0.0324641	Promoter (<=1kb)	PHF3
Peak_22742	chr17	2059442	2059878	-0.938817	0.0416155	3' UTR	HIC1
Peak_1409	chr18	54357093	54359122	-0.938546	0.0314403	Promoter (<=1kb)	STARD6
Peak_18248	chr15	74870389	74871496	-0.93805	0.00609523	Promoter (1-2kb)	SCAMP2
Peak_17411	chr20	5078306	5078712	-0.937617	0.0251237	Intron (ENST00000615008.4/29058, intron 4 of 5)	TMEM230
Peak_9302	chr16	70379899	70381471	-0.937343	0.014278	3' UTR	ST3GAL2
Peak_23392	chr1	198174345	198174901	-0.93657	0.0131799	Intron (ENST00000442588.5/140609, intron 1 of 3)	NEK7
Peak_2170	chr11	22624647	22626638	-0.935609	0.000908238	Promoter (<=1kb)	FANCF
Peak_9139	chr13	49995508	49996844	-0.934894	0.0433691	Promoter (<=1kb)	MIR3613
Peak_11041	chr19	1855520	1856944	-0.933356	0.027178	Intron (ENST00000541015.5/83855, intron 1 of 2)	KLF16
Peak_15636	chr9	77453786	77454337	-0.933115	0.019438	Promoter (1-2kb)	GNA14-AS1
Peak_11438	chr1	202967409	202968971	-0.932589	0.0305024	Promoter (<=1kb)	CYB5R1
Peak_3550	chr2	66574987	66579849	-0.931598	0.0421005	Promoter (<=1kb)	LINC01798
Peak_35039	chr2	216006294	216006827	-0.931512	0.0105318	Intron (ENST00000263268.11/55686, intron 1 of 4)	MREG
Peak_747	chr9	33262911	33264821	-0.931383	0.00998597	Promoter (<=1kb)	BAG1
Peak_18331	chr17	62652194	62652827	-0.931333	0.0388021	Intron (ENST00000303375.10/9902, intron 1 of 29)	MRC2
Peak_18547	chr12	93594041	93595865	-0.931102	0.0328279	Distal Intergenic	SOCS2
Peak_2468	chr7	65005578	65007265	-0.929737	0.0301359	Promoter (<=1kb)	ERV3-1-ZNF117
Peak_401	chr4	53364627	53366951	-0.929614	0.00256707	Promoter (<=1kb)	SCFD2
Peak_1851	chr1	185045411	185047523	-0.928252	0.0079484	Promoter (<=1kb)	RNF2
Peak_10711	chr15	39781970	39782477	-0.928098	0.0379211	Promoter (<=1kb)	LOC105370941
Peak_1540	chr2	24075177	24076740	-0.927993	0.0271924	Promoter (<=1kb)	FAM228B
Peak_507	chr14	58296609	58300369	-0.927734	0.0365493	Promoter (<=1kb)	ARMH4
Peak_8913	chr15	56241235	56243788	-0.927182	0.00120807	Promoter (<=1kb)	RFX7
Peak_23258	chr4	48899379	48899687	-0.926882	0.0286943	Promoter (1-2kb)	OCIAD2
Peak_15089	chr16	10553059	10553488	-0.926773	0.0160816	Intron (ENST00000359543.8/2013, intron 1 of 4)	EMP2
Peak_35811	chr12	116273922	116274362	-0.92621	0.0358105	Promoter (1-2kb)	MED13L
Peak_1670	chr9	125746993	125749824	-0.92416	0.00617286	Promoter (<=1kb)	PBX3
Peak_4927	chr8	89901326	89903703	-0.923613	0.0044607	Promoter (<=1kb)	OSGIN2
Peak_26707	chr4	140095071	140096054	-0.921922	0.0219281	Intron (ENST00000509479.6/55534, intron 1 of 4)	LOC101927516
Peak_3226	chr5	132487449	132490834	-0.921546	0.00182351	Promoter (<=1kb)	IRF1
Peak_19548	chr3	194205910	194206626	-0.920106	0.0216402	Promoter (<=1kb)	LINC02036
Peak_4821	chr9	100209686	100210538	-0.918464	0.0270302	Intron (ENST00000262457.7/27130, intron 3 of 16)	TEX10
Peak_3058	chr9	130040714	130043189	-0.91815	0.0130933	Promoter (<=1kb)	FNBP1
Peak_8394	chr3	86990209	86992060	-0.917712	0.0458862	Promoter (<=1kb)	VGLL3
Peak_4414	chr11	72812576	72816113	-0.914626	0.00659384	Promoter (<=1kb)	LOC107984421
Peak_20073	chr14	70981809	70983123	-0.914342	0.00526303	Intron (ENST00000554879.5/22990, intron 6 of 9)	PCNX1
Peak_37849	chr7	44844984	44845209	-0.914294	0.0423852	Intron (ENST00000222690.10/94239, intron 1 of 4)	H2AZ2
Peak_2734	chr7	92244548	92247820	-0.913307	0.0211971	Promoter (<=1kb)	ANKIB1
Peak_19214	chr4	4502741	4503412	-0.913168	0.0366037	Intron (ENST00000505286.5/53407, intron 1 of 10)	STX18-IT1
Peak_28	chr16	58392134	58393457	-0.912957	0.0245397	Promoter (<=1kb)	GINS3
Peak_4798	chr6	53346647	53349875	-0.912954	0.0058705	Promoter (<=1kb)	ELOVL5
Peak_668	chr5	34929533	34931275	-0.912363	0.0282754	Promoter (<=1kb)	DNAJC21
Peak_4991	chr3	171458175	171461927	-0.911714	0.019111	Promoter (<=1kb)	LOC102724479
Peak_27447	chr6	16236904	16237398	-0.911356	0.0290065	Promoter (1-2kb)	GMPR
Peak_5939	chr2	186693566	186695808	-0.910169	0.0101384	Promoter (<=1kb)	FAM171B
Peak_5738	chr19	2949392	2950797	-0.908353	0.0470661	Exon (ENST00000624348.1/ENST00000624348.1, exon 1 of 1)	ZNF77
Peak_17329	chr7	139105042	139105950	-0.90778	0.000446269	Intron (ENST00000242351.10/56829, intron 1 of 12)	ZC3HAV1
Peak_4605	chr2	46615403	46618385	-0.905661	0.00428228	Promoter (<=1kb)	PIGF
Peak_9355	chr7	69596904	69598040	-0.904887	0.0379996	Promoter (<=1kb)	CT66
Peak_19591	chr17	78986194	78987332	-0.9037	0.00698765	Distal Intergenic	LGALS3BP
Peak_13029	chr16	80996884	80997955	-0.903413	0.0434762	Promoter (<=1kb)	CMC2
Peak_13896	chr12	52022584	52024344	-0.902814	0.0138187	Promoter (<=1kb)	NR4A1
Peak_12852	chr2	201260482	201261299	-0.90262	0.00744539	Promoter (<=1kb)	CASP8
Peak_6258	chr1	145844977	145846600	-0.901608	0.0148494	Promoter (<=1kb)	NUDT17
Peak_19600	chr10	45592332	45592890	-0.901607	0.023372	Promoter (1-2kb)	MARCHF8
Peak_4200	chr7	63924853	63927255	-0.901527	0.021133	Promoter (<=1kb)	LOC105375318
Peak_14837	chr1	201480640	201482268	-0.900918	0.0313229	Distal Intergenic	CSRP1
Peak_24507	chr19	53871149	53871602	-0.900192	0.00531858	Promoter (1-2kb)	MYADM
Peak_29443	chr16	73166661	73167269	-0.89865	0.032951	Intron (ENST00000641206.2/463, intron 5 of 17)	ZFHX3
Peak_40317	chr3	122077868	122078161	-0.897385	0.0440356	Promoter (<=1kb)	CD86
Peak_5672	chr7	106109537	106112348	-0.897069	0.000443569	Promoter (<=1kb)	SYPL1
Peak_24587	chr19	16584371	16585010	-0.895839	0.0434981	Intron (ENST00000409035.1/9441, intron 2 of 11)	MED26
Peak_5519	chr12	1601444	1602081	-0.895789	0.0314403	Intron (ENST00000539198.5/81029, intron 1 of 3)	FBXL14
Peak_18622	chr1	40385936	40386658	-0.895602	0.0241227	Intron (ENST00000435168.6/64744, intron 2 of 6)	SMAP2
Peak_7539	chr8	103138771	103143206	-0.895468	8.25687e-05	Promoter (<=1kb)	BAALC-AS2
Peak_4912	chr21	34882759	34890697	-0.895363	0.0098102	Promoter (<=1kb)	RUNX1
Peak_20300	chr9	72527248	72528127	-0.895096	0.0125209	Intron (ENST00000643676.1/117531, intron 1 of 2)	TMC1
Peak_6689	chr7	77198736	77200730	-0.894951	0.000547018	Promoter (<=1kb)	FGL2
Peak_4113	chr11	47564910	47566889	-0.894937	0.00246805	Promoter (<=1kb)	CELF1
Peak_563	chr19	37593675	37595755	-0.893288	0.0126816	Promoter (<=1kb)	ZNF540
Peak_9268	chr9	99105371	99106680	-0.892687	0.00273132	Promoter (<=1kb)	TGFBR1
Peak_8628	chr2	64609473	64610201	-0.892555	0.0162515	Intron (ENST00000445738.5/339807, intron 1 of 3)	LINC02579
Peak_5168	chr11	119205174	119207695	-0.891232	0.0377253	Promoter (<=1kb)	CBL
Peak_23306	chr11	20066427	20067000	-0.891199	0.0130274	Intron (ENST00000360655.8/89797, intron 20 of 37)	NAV2-AS2
Peak_16656	chr13	98411547	98412225	-0.89074	0.0370614	Exon (ENST00000595437.5/10160, exon 16 of 28)	FARP1
Peak_12824	chr2	219252547	219255096	-0.889004	0.0235781	Promoter (<=1kb)	TUBA4A
Peak_23143	chr6	7145589	7146932	-0.888909	0.00166542	Intron (ENST00000379933.7/6239, intron 1 of 11)	RREB1
Peak_25248	chr2	64636619	64637385	-0.888621	0.0066362	5' UTR	LOC105374775
Peak_412	chr4	98927699	98930617	-0.888489	0.0197407	Promoter (<=1kb)	EIF4E
Peak_2288	chr3	25661690	25665951	-0.88795	0.00966107	Promoter (<=1kb)	MIR4442
Peak_14197	chr8	55843733	55845191	-0.887682	0.033534	Distal Intergenic	LYN
Peak_24486	chr1	61101485	61102028	-0.88638	0.0267324	Exon (ENST00000603233.2/ENST00000603233.2, exon 1 of 1)	NFIA
Peak_4544	chr1	89124067	89126451	-0.885806	0.000541825	Promoter (<=1kb)	GBP2
Peak_18159	chr5	139670167	139671133	-0.885447	0.00375673	Intron (ENST00000502295.1/51523, intron 1 of 1)	CXXC5
Peak_25325	chr11	118214075	118214881	-0.885385	0.0253585	Promoter (<=1kb)	JAML
Peak_5684	chr8	124369264	124373533	-0.885029	0.0037407	Promoter (<=1kb)	TMEM65
Peak_29077	chr3	108125192	108125612	-0.884873	0.0343849	Promoter (<=1kb)	LINC01215
Peak_8179	chr10	22319871	22320823	-0.884659	0.044125	Promoter (<=1kb)	BMI1
Peak_8880	chr3	31530611	31532467	-0.884488	0.00367343	Promoter (<=1kb)	STT3B
Peak_22109	chr11	116851288	116852252	-0.883402	0.0496723	Intron (ENST00000444200.1/104326055, intron 1 of 1)	SIK3
Peak_2008	chr6	123802282	123807302	-0.882603	0.0271714	Promoter (<=1kb)	NKAIN2
Peak_4315	chr6	57221106	57223332	-0.882431	0.0325995	Promoter (<=1kb)	RAB23
Peak_23199	chr11	737385	738024	-0.881837	0.0171404	Distal Intergenic	TALDO1
Peak_9508	chr6	89410559	89413743	-0.881304	0.000181618	Promoter (<=1kb)	RRAGD
Peak_2240	chr21	39347386	39349103	-0.880899	0.0461927	Promoter (<=1kb)	HMGN1
Peak_28233	chr3	100073417	100074484	-0.879973	0.0218228	Intron (ENST00000463526.1/84319, intron 2 of 3)	FILIP1L
Peak_2444	chr17	82418322	82420192	-0.879643	0.0315877	Promoter (<=1kb)	HEXD
Peak_7206	chr19	47744973	47746355	-0.879332	0.0445323	Promoter (<=1kb)	NOP53
Peak_14886	chr7	137934548	137936503	-0.878793	2.18913e-05	Promoter (<=1kb)	CREB3L2
Peak_15612	chr8	97598139	97599005	-0.878777	0.0262783	Distal Intergenic	MTDH
Peak_44818	chr13	48979562	48980138	-0.878516	0.0147833	Intron (ENST00000492622.6/22862, intron 1 of 25)	FNDC3A
Peak_31523	chr11	58573766	58574176	-0.876865	0.022838	Promoter (1-2kb)	LPXN
Peak_9709	chr5	32020205	32020660	-0.875975	0.030475	Intron (ENST00000438447.2/23037, intron 6 of 24)	PDZD2
Peak_14120	chr9	78022590	78023620	-0.874593	0.0114409	Intron (ENST00000286548.9/2776, intron 1 of 6)	GNAQ
Peak_2491	chr6	110873457	110880494	-0.874353	8.14168e-08	Promoter (<=1kb)	AMD1
Peak_10120	chr16	69563861	69565743	-0.871612	0.0007705	Promoter (<=1kb)	NFAT5
Peak_3028	chr15	62059188	62061662	-0.870975	0.0223881	Promoter (<=1kb)	VPS13C-DT
Peak_4196	chr2	135984114	135986293	-0.870642	0.00676254	Promoter (<=1kb)	DARS1-AS1
Peak_712	chr6	70412445	70414912	-0.870525	0.00433163	Promoter (<=1kb)	FAM135A-AS1
Peak_1262	chr6	27144486	27146924	-0.870124	0.0433616	Promoter (<=1kb)	H2BC12
Peak_35292	chr3	188359382	188359710	-0.87009	0.0375726	Intron (ENST00000448637.5/4026, intron 2 of 6)	LPP
Peak_5778	chr8	30383434	30388052	-0.870019	0.00861921	Promoter (<=1kb)	RBPMS-AS1
Peak_19671	chr15	42510825	42511787	-0.869692	0.0127306	Promoter (<=1kb)	SNAP23
Peak_8124	chr16	82169208	82170256	-0.869226	0.0296419	Promoter (<=1kb)	MPHOSPH6
Peak_12447	chr3	50338530	50341636	-0.868992	0.000347102	Promoter (<=1kb)	RASSF1
Peak_30636	chr8	42047426	42047696	-0.868917	0.0353671	3' UTR	KAT6A
Peak_12971	chr2	231052472	231053336	-0.868662	0.0456766	Exon (ENST00000568958.1/ENST00000568958.1, exon 1 of 1)	PSMD1
Peak_12366	chr12	95547487	95548834	-0.867443	0.0124113	Promoter (<=1kb)	USP44
Peak_12303	chr8	93991011	93992197	-0.866703	0.0212764	Distal Intergenic	PDP1
Peak_9884	chr2	85576972	85579926	-0.866464	0.00146484	Promoter (<=1kb)	VAMP8
Peak_6123	chr3	33716820	33719191	-0.866205	0.0211051	Promoter (<=1kb)	CLASP2
Peak_5798	chr9	127777490	127779526	-0.865531	0.00453587	Promoter (<=1kb)	SH2D3C
Peak_2765	chr4	80069998	80073951	-0.864514	0.000308596	Promoter (<=1kb)	ANTXR2
Peak_33699	chr15	85585456	85585996	-0.864186	0.00160678	5' UTR	AKAP13
Peak_34659	chr15	70094082	70094430	-0.864096	0.0133649	Promoter (<=1kb)	TLE3
Peak_5531	chr5	81748361	81750468	-0.863332	0.00059049	Promoter (<=1kb)	SSBP2
Peak_16339	chr7	102284734	102285659	-0.86312	0.0415379	Promoter (<=1kb)	SH2B2
Peak_13284	chr6	89356742	89358127	-0.86294	0.0332796	Distal Intergenic	UBE2J1
Peak_27482	chr4	153256958	153257577	-0.861964	0.024398	Promoter (<=1kb)	TRIM2
Peak_31910	chr10	13659253	13659750	-0.861226	0.0375726	Exon (ENST00000357447.7/55691, exon 21 of 25)	FRMD4A
Peak_21571	chr12	11812489	11813517	-0.860057	0.0348314	Intron (ENST00000396373.9/2120, intron 2 of 7)	ETV6
Peak_32167	chr10	84424741	84425386	-0.859979	0.0443298	Promoter (<=1kb)	CCSER2
Peak_3687	chr11	3837981	3840978	-0.85897	0.0010984	Promoter (<=1kb)	RHOG
Peak_2247	chr1	40373620	40375723	-0.85897	0.01075	Promoter (<=1kb)	SMAP2
Peak_6504	chr14	52694327	52696213	-0.8581	0.0440356	Promoter (<=1kb)	ERO1A
Peak_21470	chr4	8201696	8202225	-0.857809	0.00724604	Promoter (<=1kb)	SH3TC1
Peak_7139	chr7	22854140	22855666	-0.857315	0.00165291	Promoter (<=1kb)	SNHG26
Peak_13027	chr5	95834248	95835317	-0.855593	0.0225616	Exon (ENST00000514941.1/ENST00000514941.1, exon 1 of 2)	LINC01554
Peak_12769	chr2	9205835	9206653	-0.855248	0.0244044	Promoter (<=1kb)	ASAP2
Peak_13710	chr13	99495855	99497225	-0.854887	0.033375	Promoter (<=1kb)	LINC01232
Peak_9494	chr2	66580447	66584435	-0.854702	0.0396675	Intron (ENST00000433396.5/100507073, intron 1 of 5)	LINC01798
Peak_14581	chr18	12679185	12679926	-0.853981	0.0340468	Promoter (<=1kb)	CEP76
Peak_72	chr18	11849810	11853587	-0.853078	0.00208485	Promoter (<=1kb)	CHMP1B
Peak_4487	chr12	65822521	65828357	-0.852724	0.00664973	Promoter (<=1kb)	RPSAP52
Peak_21528	chr5	124735121	124735790	-0.852616	0.0208768	Exon (ENST00000507630.1/ENST00000507630.1, exon 1 of 1)	ZNF608
Peak_17793	chr14	58353387	58354198	-0.851318	0.00759594	Promoter (<=1kb)	ARID4A
Peak_10426	chr12	121465644	121467326	-0.849977	0.00106103	Exon (ENST00000538243.1/84678, exon 1 of 5)	KDM2B
Peak_23642	chr14	105065570	105065966	-0.849962	0.0293162	Promoter (<=1kb)	GPR132
Peak_5621	chr4	90126558	90129706	-0.849961	0.0160288	Promoter (<=1kb)	CCSER1
Peak_8918	chr15	52527752	52528905	-0.84858	0.00661892	Promoter (<=1kb)	MYO5A
Peak_10171	chr6	106509604	106514275	-0.848556	0.0202849	Exon (ENST00000633556.3/202, exon 3 of 22)	CRYBG1
Peak_23467	chr4	159206351	159206699	-0.848034	0.0285314	Intron (ENST00000644474.1/9693, intron 3 of 29)	RAPGEF2
Peak_4562	chr17	29137904	29141842	-0.84773	0.000452222	Promoter (<=1kb)	MYO18A
Peak_12468	chr7	5396343	5397270	-0.847595	0.00718272	Intron (ENST00000399537.8/84629, intron 2 of 29)	TNRC18
Peak_6084	chr20	5949462	5951566	-0.846655	0.0285314	Promoter (<=1kb)	TRMT6
Peak_6705	chr6	89145360	89147693	-0.845017	0.00349325	Promoter (<=1kb)	LOC101929004
Peak_1330	chr1	154271841	154273579	-0.844765	0.0190963	Promoter (<=1kb)	HAX1
Peak_6660	chr6	56842619	56843698	-0.84467	0.0436758	Promoter (<=1kb)	DST
Peak_8308	chr14	100221447	100222926	-0.844665	0.00376815	Intron (ENST00000554537.1/ENST00000554537.1, intron 1 of 1)	YY1
Peak_25234	chr14	77598716	77599442	-0.843876	0.00427624	Promoter (1-2kb)	SPTLC2
Peak_914	chr12	45724917	45728910	-0.842375	0.0293623	Promoter (<=1kb)	LINC00938
Peak_7365	chr7	74289467	74291213	-0.841322	0.00146484	Promoter (<=1kb)	CLIP2
Peak_14178	chr6	3022950	3024500	-0.841003	0.00192884	Promoter (<=1kb)	LOC101927759
Peak_13458	chr4	47836131	47838191	-0.840913	0.0434981	Promoter (<=1kb)	CORIN
Peak_27399	chr11	68550201	68551018	-0.840812	0.0432679	Exon (ENST00000527069.5/55291, exon 4 of 4)	PPP6R3
Peak_469	chr5	131794612	131797071	-0.840358	0.00843434	Promoter (<=1kb)	RAPGEF6
Peak_24109	chr19	42198979	42200300	-0.840326	0.0316006	3' UTR	POU2F2
Peak_18526	chr3	71455562	71456734	-0.839775	0.00548247	Intron (ENST00000649528.3/27086, intron 3 of 20)	FOXP1
Peak_7380	chr11	68841956	68844578	-0.839239	0.00233414	Promoter (<=1kb)	CPT1A
Peak_5744	chr2	203327551	203329660	-0.839181	0.0153763	Promoter (<=1kb)	ABI2
Peak_2885	chr1	232950021	232951743	-0.837346	0.0115543	Promoter (<=1kb)	NTPCR
Peak_16908	chr17	50055107	50057034	-0.835876	0.0286077	Promoter (<=1kb)	PICART1
Peak_5242	chr4	44677605	44679860	-0.835103	0.0164966	Promoter (<=1kb)	YIPF7
Peak_7889	chr13	105139078	105140401	-0.834536	0.0395765	Distal Intergenic	LOC105370344
Peak_235	chr19	11964440	11966019	-0.834419	0.0303492	Promoter (<=1kb)	ZNF763
Peak_6399	chr7	141013820	141015587	-0.833064	0.0475349	Promoter (<=1kb)	MRPS33
Peak_14124	chr2	207143340	207144253	-0.832229	0.037672	Intron (ENST00000309446.11/8609, intron 1 of 3)	KLF7
Peak_23429	chr1	26126551	26126976	-0.831367	0.0358429	Distal Intergenic	PDIK1L
Peak_2313	chr14	49851357	49853483	-0.830173	0.0210074	Promoter (<=1kb)	NEMF
Peak_3736	chr1	225425207	225429064	-0.829096	0.00984824	Promoter (<=1kb)	LBR
Peak_28862	chr18	35050333	35051384	-0.828513	0.00375694	Intron (ENST00000591734.5/10982, intron 2 of 5)	MAPRE2
Peak_1730	chr5	111755552	111758584	-0.82619	0.00793586	Promoter (<=1kb)	NREP
Peak_180	chr7	26196809	26204890	-0.826182	0.00031393	Promoter (<=1kb)	CBX3
Peak_5136	chr6	110981091	110983272	-0.826019	0.0351832	Promoter (<=1kb)	RPF2
Peak_18786	chr16	85616154	85617483	-0.825823	0.0187001	Intron (ENST00000637419.1/23199, intron 2 of 2)	GSE1
Peak_717	chr9	2014064	2019719	-0.825743	0.0042326	Promoter (<=1kb)	SMARCA2
Peak_11441	chr21	35528320	35529585	-0.825416	0.0416155	Intron (ENST00000475045.6/101928269, intron 8 of 12)	LOC100506403
Peak_4330	chr1	84143946	84148365	-0.823698	0.041092	Promoter (<=1kb)	PRKACB
Peak_10819	chr17	78130133	78132909	-0.823033	0.000545095	Promoter (<=1kb)	TMC6
Peak_35381	chr17	59362505	59362995	-0.822979	0.0476873	Exon (ENST00000623355.1/ENST00000623355.1, exon 1 of 1)	MIR4729
Peak_3035	chr18	31497372	31499528	-0.82249	0.0144174	Promoter (<=1kb)	DSG2
Peak_8115	chr1	148333718	148335730	-0.821435	0.0123067	Promoter (<=1kb)	MIR5087
Peak_6245	chr10	60731653	60734058	-0.821324	0.0134042	Promoter (<=1kb)	LOC107984292
Peak_18249	chr16	19118776	19119418	-0.821093	0.0353563	3' UTR	ITPRIPL2
Peak_7865	chr2	65055276	65057782	-0.821079	0.0178346	Promoter (<=1kb)	LOC107984063
Peak_6303	chr10	28531552	28533654	-0.820865	0.0183417	Promoter (<=1kb)	WAC-AS1
Peak_26583	chr17	80765036	80765886	-0.820851	0.0185138	Intron (ENST00000574767.5/57521, intron 5 of 11)	RPTOR
Peak_15424	chr1	39214974	39215791	-0.820487	0.00982466	Promoter (<=1kb)	MACF1
Peak_20692	chr10	12588089	12588743	-0.820128	0.0434762	Intron (ENST00000619168.5/57118, intron 2 of 10)	MIR4480
Peak_5419	chr1	244652955	244655226	-0.817263	0.00778089	Promoter (<=1kb)	DESI2
Peak_2391	chr3	33797841	33799690	-0.817197	0.0411314	Promoter (<=1kb)	PDCD6IP
Peak_21617	chr16	2487680	2488490	-0.816772	0.00967782	Intron (ENST00000567020.6/57465, intron 1 of 6)	TBC1D24
Peak_3142	chr19	47109459	47112465	-0.816755	0.0408066	Promoter (<=1kb)	ZC3H4
Peak_9900	chr3	63967193	63970469	-0.816461	0.00425555	Promoter (<=1kb)	ATXN7
Peak_2921	chr4	26582968	26585024	-0.816423	0.033375	Promoter (<=1kb)	TBC1D19
Peak_15079	chr8	33514018	33515126	-0.814729	0.0358617	Promoter (<=1kb)	SNORD13
Peak_18573	chr10	35607547	35608206	-0.813439	0.0465207	Exon (ENST00000321660.2/219770, exon 2 of 2)	GJD4
Peak_5235	chr12	46383441	46384880	-0.812771	0.0128158	Promoter (<=1kb)	LOC100288798
Peak_17732	chr9	96413520	96414063	-0.811831	0.0308567	Intron (ENST00000375256.5/195828, intron 1 of 4)	ZNF367
Peak_12156	chr7	139778092	139779056	-0.811415	0.0390196	Promoter (<=1kb)	TBXAS1
Peak_4161	chr2	201232912	201236557	-0.811265	6.29933e-05	Promoter (<=1kb)	CASP8
Peak_21654	chr6	26441469	26442276	-0.810355	0.0445017	Promoter (<=1kb)	BTN3A3
Peak_10788	chr6	15248873	15250200	-0.808134	0.0418565	Promoter (<=1kb)	JARID2
Peak_6662	chr6	4777148	4778172	-0.808094	0.0208395	Promoter (<=1kb)	CDYL
Peak_3759	chr19	3135953	3137938	-0.805881	0.0280002	Promoter (<=1kb)	GNA15
Peak_14655	chr17	41678325	41679406	-0.805797	0.0274997	Distal Intergenic	EIF1
Peak_16256	chr22	21816894	21817679	-0.805222	0.016263	Intron (ENST00000215832.11/5594, intron 1 of 8)	MAPK1
Peak_12633	chr1	209756053	209757794	-0.804577	0.0375349	Promoter (<=1kb)	TRAF3IP3
Peak_3443	chr4	88282663	88285671	-0.804199	0.011958	Promoter (<=1kb)	PPM1K-DT
Peak_17985	chr7	140229592	140230128	-0.801576	0.0107919	Distal Intergenic	KDM7A-DT
Peak_28772	chr1	212186716	212186983	-0.800123	0.0454909	Intron (ENST00000444750.1/ENST00000444750.1, intron 3 of 3)	LINC02608
Peak_15463	chr6	136783712	136785995	-0.798813	0.00202328	Promoter (<=1kb)	LOC101928429
Peak_19207	chr11	66081099	66082055	-0.797614	0.016368	Promoter (1-2kb)	PACS1
Peak_7593	chr3	120347751	120350621	-0.797256	0.00582567	Promoter (<=1kb)	LRRC58-DT
Peak_38973	chr19	33371996	33372467	-0.796696	0.049635	Promoter (1-2kb)	CEBPG
Peak_30993	chr1	27403179	27403813	-0.79643	0.0246502	Distal Intergenic	GPR3
Peak_3361	chr12	46266437	46270367	-0.796339	0.0029066	Promoter (<=1kb)	SLC38A1
Peak_6022	chr15	78564767	78566941	-0.795425	0.0263129	Promoter (<=1kb)	CHRNA5
Peak_4613	chr11	103108866	103110357	-0.795253	0.0294748	Promoter (<=1kb)	DYNC2H1
Peak_4309	chr15	70094580	70097958	-0.794881	0.000758491	Promoter (<=1kb)	TLE3
Peak_1498	chr5	96875835	96878036	-0.794633	0.0174037	Promoter (<=1kb)	ERAP2
Peak_10334	chr15	45521386	45523414	-0.794625	0.0152007	Promoter (<=1kb)	SLC30A4
Peak_5494	chr20	8132233	8134543	-0.794508	0.0368203	Promoter (<=1kb)	PLCB1
Peak_4370	chr17	82448845	82450816	-0.794431	0.0223881	Promoter (<=1kb)	CYBC1
Peak_19407	chr3	52532581	52533652	-0.79426	0.0377143	Promoter (<=1kb)	NT5DC2
Peak_4025	chr4	37825366	37828014	-0.793459	0.00286777	Promoter (<=1kb)	PGM2
Peak_4396	chr10	22314878	22317582	-0.791904	0.0361287	Promoter (<=1kb)	COMMD3-BMI1
Peak_13904	chr6	2769505	2770740	-0.791652	0.0308556	Promoter (<=1kb)	WRNIP1
Peak_14652	chr2	120176715	120177941	-0.790652	0.0262165	3' UTR	EPB41L5
Peak_8406	chr7	74209936	74211624	-0.789864	0.0104849	Promoter (<=1kb)	LAT2
Peak_29226	chr1	89904169	89904741	-0.788795	0.0323822	Intron (ENST00000370453.5/55144, intron 3 of 3)	LRRC8D
Peak_18501	chr13	108266239	108267068	-0.787806	0.00543504	Intron (ENST00000486502.1/ENST00000486502.1, intron 1 of 1)	TNFSF13B
Peak_39218	chr9	111663130	111663499	-0.786897	0.0447365	Promoter (1-2kb)	GNG10
Peak_11266	chr1	46166501	46167445	-0.786304	0.0422122	Intron (ENST00000540385.2/110117499, intron 1 of 9)	TSPAN1
Peak_3059	chr9	98254593	98257224	-0.785605	0.0285341	Promoter (<=1kb)	TBC1D2
Peak_2558	chr4	177440802	177443305	-0.785484	0.0018042	Promoter (<=1kb)	AGA
Peak_2730	chr2	213283520	213285253	-0.785335	0.027409	Promoter (<=1kb)	SPAG16-DT
Peak_2376	chr7	5424220	5431006	-0.784694	0.00533861	Promoter (<=1kb)	LOC100129484
Peak_19513	chr3	194397030	194398553	-0.784453	0.0248325	5' UTR	ATP13A3
Peak_7122	chr1	154220831	154222709	-0.784446	0.0401866	Promoter (<=1kb)	UBAP2L
Peak_31833	chr6	15398492	15399140	-0.784154	0.0233835	Intron (ENST00000341776.7/3720, intron 2 of 17)	JARID2
Peak_1467	chr4	119211438	119214209	-0.78386	0.0116217	Promoter (<=1kb)	LOC101929762
Peak_21772	chr1	2290960	2291565	-0.783738	0.0402743	Intron (ENST00000378536.5/6497, intron 1 of 6)	SKI
Peak_14173	chr12	7959484	7961345	-0.783049	0.00480575	Intron (ENST00000661633.1/ENST00000661633.1, intron 1 of 1)	SLC2A3
Peak_10789	chr6	7052487	7053342	-0.782835	0.011326	Distal Intergenic	RREB1
Peak_17733	chr1	111515031	111516316	-0.782346	0.0229532	Intron (ENST00000369717.8/57413, intron 1 of 5)	TMIGD3
Peak_10203	chr12	50220457	50223153	-0.782314	0.00783149	Promoter (<=1kb)	LIMA1
Peak_3221	chr7	7967433	7971402	-0.782139	0.0125117	Promoter (<=1kb)	GLCCI1-DT
Peak_10488	chr8	38465313	38469026	-0.781366	0.0296801	Promoter (<=1kb)	FGFR1
Peak_4341	chr17	43210885	43213549	-0.781108	0.028985	Promoter (<=1kb)	TMEM106A
Peak_33455	chr5	143352901	143353272	-0.780133	0.0264132	Intron (ENST00000343796.6/2908, intron 2 of 8)	NR3C1
Peak_16278	chr4	168877435	168878142	-0.779295	0.0436758	5' UTR	PALLD
Peak_8234	chr4	77073040	77075381	-0.778118	0.0167987	Promoter (<=1kb)	CCNI
Peak_1145	chr12	54277746	54280590	-0.776397	0.0142335	Promoter (<=1kb)	CBX5
Peak_1209	chr7	148940163	148942680	-0.775211	0.0276966	Promoter (<=1kb)	RNY5
Peak_4365	chr16	14070569	14072307	-0.774119	0.0131817	Promoter (<=1kb)	MRTFB
Peak_4753	chr19	3178179	3181530	-0.774116	0.012975	Promoter (<=1kb)	S1PR4
Peak_4732	chr1	179293162	179294882	-0.772897	0.0116382	Promoter (<=1kb)	SOAT1
Peak_1120	chr4	145097037	145100056	-0.769662	0.0307954	Promoter (<=1kb)	ANAPC10
Peak_17254	chr14	50362812	50364150	-0.768855	0.00454952	Promoter (<=1kb)	CDKL1
Peak_2845	chr4	94207116	94209074	-0.7667	0.0257085	Promoter (<=1kb)	SMARCAD1-DT
Peak_17165	chr2	11129640	11130656	-0.766559	0.0493487	Promoter (1-2kb)	FLJ33534
Peak_6421	chr9	78235236	78236977	-0.766546	0.0306362	Promoter (<=1kb)	CEP78
Peak_30500	chr3	56895121	56895409	-0.765839	0.043509	Intron (ENST00000338458.8/50650, intron 3 of 12)	ARHGEF3
Peak_9703	chr14	67487857	67489049	-0.76553	0.0461927	Promoter (<=1kb)	TMEM229B
Peak_33867	chr3	71387794	71388561	-0.764747	0.0194325	Intron (ENST00000649528.3/27086, intron 3 of 20)	FOXP1
Peak_16373	chr6	16712097	16713620	-0.764009	0.0034069	Intron (ENST00000244769.8/6310, intron 3 of 8)	ATXN1
Peak_1743	chr9	20619364	20624975	-0.763846	0.000463148	Promoter (<=1kb)	MLLT3
Peak_9470	chr12	6828051	6829761	-0.7637	0.0313229	Promoter (<=1kb)	P3H3
Peak_2276	chr6	43686740	43688523	-0.763339	0.0166772	Promoter (<=1kb)	MRPS18A
Peak_12413	chr3	42978800	42980067	-0.763333	0.0448015	Promoter (<=1kb)	GASK1A
Peak_371	chr8	81839613	81842305	-0.763214	0.0105165	Promoter (<=1kb)	LINC02235
Peak_269	chr5	122775018	122777450	-0.763135	0.00519098	Promoter (<=1kb)	SNX2
Peak_1309	chr5	36150590	36153183	-0.762548	0.0283566	Promoter (<=1kb)	SKP2
Peak_1455	chr13	46050948	46053814	-0.761455	0.0254025	Promoter (<=1kb)	CPB2-AS1
Peak_6558	chr4	55947069	55950576	-0.761026	0.0139478	Promoter (<=1kb)	LOC105377663
Peak_4426	chr2	171521684	171524781	-0.760123	0.000177995	Promoter (<=1kb)	CYBRD1
Peak_14163	chr22	31637446	31638947	-0.759605	0.00375694	Promoter (<=1kb)	PISD
Peak_21920	chr2	200866973	200867519	-0.756444	0.0201515	Distal Intergenic	CLK1
Peak_1894	chr4	168317717	168319653	-0.755615	0.0254636	Promoter (<=1kb)	DDX60
Peak_12895	chr12	3751997	3753859	-0.755492	0.00276659	Promoter (<=1kb)	LOC107984495
Peak_2622	chr7	112788815	112790968	-0.754237	0.031371	Promoter (<=1kb)	TMEM168
Peak_19627	chr9	130039142	130040535	-0.753243	0.00453305	Intron (ENST00000446176.7/23048, intron 1 of 16)	FNBP1
Peak_8722	chr9	97237845	97239429	-0.753184	0.027212	Promoter (<=1kb)	SUGT1P4-STRA6LP
Peak_2331	chr17	57256701	57261499	-0.752227	0.00605809	Promoter (<=1kb)	MSI2
Peak_8341	chr1	151539642	151541692	-0.751518	0.0417898	Promoter (<=1kb)	TUFT1
Peak_14252	chr17	64975675	64976634	-0.751276	0.0313229	Promoter (<=1kb)	AMZ2P1
Peak_936	chr2	43218820	43228658	-0.750192	0.00841816	Promoter (<=1kb)	LINC01126
Peak_532	chr8	20197301	20199107	-0.748557	0.0114142	Promoter (<=1kb)	ATP6V1B2
Peak_11972	chr12	112906674	112908138	-0.747798	0.0453131	Promoter (<=1kb)	OAS1
Peak_13100	chr10	128047217	128049174	-0.747545	0.0106083	Promoter (<=1kb)	PTPRE
Peak_15744	chr14	89164802	89166468	-0.74731	0.0144493	Intron (ENST00000557572.1/1112, intron 1 of 2)	FOXN3
Peak_23281	chr8	140598121	140599144	-0.746862	0.0423976	Intron (ENST00000220592.10/27161, intron 1 of 18)	AGO2
Peak_26556	chr6	158026043	158026799	-0.745932	0.03712	Intron (ENST00000355585.9/8871, intron 2 of 26)	SYNJ2
Peak_3480	chr5	72815566	72818367	-0.745598	0.0446226	Promoter (<=1kb)	TNPO1
Peak_13530	chr12	3869654	3871255	-0.745269	0.017306	Promoter (<=1kb)	PARP11-AS1
Peak_1553	chr13	77324640	77327777	-0.744239	0.0313121	Promoter (<=1kb)	MYCBP2
Peak_5429	chr7	107890409	107892555	-0.743143	0.00688702	Promoter (<=1kb)	DLD
Peak_5381	chr3	108221098	108223461	-0.742258	0.00675922	Promoter (<=1kb)	IFT57
Peak_4199	chr7	130911997	130914086	-0.740154	0.0156006	Promoter (<=1kb)	LINC00513
Peak_5637	chr2	174595255	174598459	-0.739607	0.00383536	Promoter (<=1kb)	WIPF1
Peak_5353	chr6	133951288	133954232	-0.739127	0.0474498	Promoter (<=1kb)	TBPL1
Peak_5868	chr12	93590894	93592662	-0.738521	0.0285314	Distal Intergenic	SOCS2
Peak_14984	chr16	57536230	57537539	-0.73852	0.0443263	Promoter (<=1kb)	CCDC102A
Peak_10715	chr6	71287903	71290375	-0.738036	0.00349325	Promoter (<=1kb)	OGFRL1
Peak_4179	chr11	9664123	9665475	-0.737535	0.0138062	Promoter (<=1kb)	SWAP70
Peak_3355	chr1	206557139	206559770	-0.7367	0.0118789	Promoter (<=1kb)	RASSF5
Peak_278	chr12	54297630	54302728	-0.736367	0.0441261	Promoter (<=1kb)	COPZ1
Peak_7132	chr4	15777761	15780280	-0.735835	0.0132329	Promoter (<=1kb)	CD38
Peak_465	chr4	151099040	151101835	-0.735394	0.00133793	Promoter (<=1kb)	RPS3A
Peak_4416	chr19	19642363	19644109	-0.735147	0.0341337	Promoter (<=1kb)	GMIP
Peak_3115	chr12	102061015	102062480	-0.733843	0.0127537	Promoter (<=1kb)	WASHC3
Peak_3086	chr1	239385668	239389103	-0.732753	0.0288716	Promoter (<=1kb)	CHRM3
Peak_5079	chr9	123032687	123038713	-0.732073	0.0140162	Promoter (<=1kb)	RABGAP1
Peak_3294	chr3	174439603	174442385	-0.731729	0.00712519	Promoter (<=1kb)	NAALADL2
Peak_15978	chr17	67520225	67520857	-0.730346	0.0108363	Intron (ENST00000581322.6/26207, intron 1 of 8)	PITPNC1
Peak_10035	chr10	96042945	96045389	-0.728794	0.00863307	Promoter (<=1kb)	CCNJ
Peak_2348	chr12	32754375	32756460	-0.727778	0.0459393	Promoter (<=1kb)	YARS2
Peak_361	chr3	160398443	160404856	-0.727085	0.000666544	Promoter (<=1kb)	TRIM59-IFT80
Peak_28468	chr1	168227127	168227459	-0.726671	0.0288956	Promoter (1-2kb)	SFT2D2
Peak_1561	chr17	69414262	69416402	-0.726404	0.0379051	Promoter (<=1kb)	MAP2K6
Peak_1569	chr1	108876628	108878518	-0.726241	0.0334774	Promoter (<=1kb)	GPSM2
Peak_8433	chr9	125706194	125707702	-0.725133	0.0466683	Promoter (<=1kb)	MAPKAP1
Peak_10223	chr12	47078725	47081246	-0.724812	0.0148852	Promoter (<=1kb)	AMIGO2
Peak_1515	chr3	41960786	41962863	-0.722984	0.0432342	Promoter (<=1kb)	ULK4
Peak_965	chr13	39035454	39039758	-0.720009	0.0183472	Promoter (<=1kb)	NHLRC3
Peak_10230	chr20	16572767	16573995	-0.719813	0.0266489	Promoter (<=1kb)	KIF16B
Peak_5965	chr6	116680530	116681088	-0.719422	0.0351334	Promoter (<=1kb)	KPNA5
Peak_13801	chr4	1683153	1684322	-0.719339	0.0489641	Promoter (<=1kb)	FAM53A
Peak_25503	chr6	17962387	17962707	-0.717666	0.0462599	Intron (ENST00000378814.9/63971, intron 2 of 37)	KIF13A
Peak_22325	chr6	118864212	118865295	-0.7176	0.00954549	Intron (ENST00000316316.10/254394, intron 7 of 12)	ASF1A
Peak_11860	chr19	1650341	1652391	-0.714859	0.0186223	Promoter (<=1kb)	TCF3
Peak_5793	chr9	85740611	85742989	-0.713298	0.0408066	Promoter (<=1kb)	AGTPBP1
Peak_6679	chr12	79687725	79692186	-0.71306	0.0277223	Promoter (<=1kb)	PPP1R12A-AS2
Peak_1199	chr5	33439472	33442297	-0.712818	0.0142599	Promoter (<=1kb)	TARS1-DT
Peak_2584	chr6	110813512	110816594	-0.71113	0.0275636	Promoter (<=1kb)	CDK19
Peak_5862	chr11	46347446	46349463	-0.710393	0.0199393	Promoter (<=1kb)	DGKZ
Peak_21027	chr3	71303576	71304697	-0.710301	0.0307197	Promoter (<=1kb)	FOXP1
Peak_4771	chr7	16753242	16755385	-0.709905	0.030392	Promoter (<=1kb)	TSPAN13
Peak_21972	chr4	185128288	185129225	-0.709784	0.0497491	Distal Intergenic	SLC25A4
Peak_6420	chr8	22604162	22606101	-0.709668	0.0485861	Promoter (<=1kb)	CCAR2
Peak_22126	chr8	66917559	66918202	-0.709653	0.0243546	Intron (ENST00000428734.5/157777, intron 13 of 13)	SNORD87
Peak_2657	chr1	23978410	23980395	-0.709573	0.0446338	Promoter (<=1kb)	SRSF10
Peak_18648	chr2	111118306	111119796	-0.708873	0.0307954	Promoter (<=1kb)	BCL2L11
Peak_878	chr1	40039209	40042035	-0.708086	0.0107938	Promoter (<=1kb)	CAP1
Peak_9276	chr10	125157476	125159292	-0.708048	0.046466	Promoter (<=1kb)	CTBP2
Peak_2480	chr6	2838189	2842598	-0.70774	0.000554764	Promoter (<=1kb)	SERPINB1
Peak_2813	chr7	45110645	45112558	-0.707727	0.0134468	Promoter (<=1kb)	TBRG4
Peak_17381	chr8	38769776	38770757	-0.707723	0.0452204	Intron (ENST00000519416.5/6867, intron 1 of 12)	TACC1
Peak_3483	chr8	56073193	56074591	-0.707164	0.0318457	Promoter (<=1kb)	SNORD54
Peak_3248	chr11	63680803	63683413	-0.706683	0.02965	Promoter (<=1kb)	RTN3
Peak_14634	chr13	33032852	33034001	-0.706522	0.0262829	Intron (ENST00000380099.4/9365, intron 1 of 4)	KL
Peak_1233	chr7	139106132	139110590	-0.706506	0.00174354	Promoter (<=1kb)	ZC3HAV1
Peak_28259	chr8	27328211	27328867	-0.705919	0.0380667	Promoter (1-2kb)	PTK2B
Peak_5371	chr7	26374003	26377548	-0.705393	0.0236909	Promoter (<=1kb)	SNX10-AS1
Peak_4919	chr5	76714520	76718145	-0.704757	0.011958	Promoter (<=1kb)	F2R
Peak_2335	chr1	93344916	93349788	-0.704334	0.00441295	Promoter (<=1kb)	CCDC18-AS1
Peak_28216	chr18	2960405	2960796	-0.703993	0.012397	Exon (ENST00000584431.1/ENST00000584431.1, exon 4 of 4)	LOC105371963
Peak_2005	chr21	37366667	37371385	-0.702165	0.00278191	Promoter (<=1kb)	DYRK1A
Peak_1566	chr14	77375633	77377824	-0.701765	0.012634	Promoter (<=1kb)	SAMD15
Peak_14653	chr20	47353541	47356256	-0.699147	0.0135542	Promoter (<=1kb)	ZMYND8
Peak_6537	chr22	27917756	27919251	-0.698378	0.0413902	Promoter (<=1kb)	PITPNB
Peak_3906	chr7	88218294	88221547	-0.698047	0.0220306	Promoter (<=1kb)	SRI
Peak_32005	chr4	39946271	39946671	-0.696899	0.0218112	Intron (ENST00000303538.13/23244, intron 2 of 32)	PDS5A
Peak_18384	chr22	50314215	50315067	-0.694998	0.0469885	Exon (ENST00000453835.1/ENST00000453835.1, exon 1 of 2)	DENND6B
Peak_5010	chr6	125956106	125958734	-0.694424	0.00588364	Promoter (<=1kb)	HINT3
Peak_4316	chr7	100476286	100479864	-0.692341	0.00406295	Promoter (<=1kb)	TSC22D4
Peak_11440	chr2	236536925	236539205	-0.691287	0.0227302	Distal Intergenic	ACKR3
Peak_6994	chr7	44489183	44491498	-0.691124	0.03774	Promoter (<=1kb)	NUDCD3
Peak_6699	chr11	5689150	5692776	-0.691052	0.0026632	Promoter (<=1kb)	TRIM22
Peak_25819	chr2	10382180	10383214	-0.690095	0.0183236	Intron (ENST00000423674.5/3241, intron 1 of 3)	HPCAL1
Peak_9569	chr22	26588540	26590868	-0.690018	0.0175207	Promoter (<=1kb)	TPST2
Peak_23234	chr8	28370189	28370993	-0.687356	0.0210137	Intron (ENST00000344423.10/55893, intron 1 of 9)	ZNF395
Peak_18273	chr10	30529268	30530269	-0.686713	0.0413571	Promoter (<=1kb)	LOC105376478
Peak_18111	chr10	102673714	102674853	-0.686458	0.0120975	3' UTR	TRIM8
Peak_3457	chr20	17965374	17972083	-0.686192	0.000901472	Promoter (<=1kb)	SNX5
Peak_7768	chr15	74995068	74996521	-0.68609	0.0457503	Promoter (<=1kb)	SCAMP5
Peak_290	chr18	62187191	62189475	-0.685645	0.03712	Promoter (<=1kb)	RELCH
Peak_4592	chr2	159903077	159905419	-0.684992	0.00791441	Promoter (<=1kb)	LY75-CD302
Peak_3583	chr3	4491764	4496479	-0.684809	0.00265007	Promoter (<=1kb)	ITPR1-DT
Peak_4850	chr15	63599331	63602079	-0.684501	0.0416155	Promoter (<=1kb)	USP3-AS1
Peak_11047	chr9	130835353	130836449	-0.683996	0.0411774	Promoter (<=1kb)	ABL1
Peak_7221	chr5	151222245	151224558	-0.683486	0.0225416	Promoter (<=1kb)	CCDC69
Peak_3775	chr6	139027446	139030853	-0.683421	0.00669005	Promoter (<=1kb)	ABRACL
Peak_5611	chr19	35153993	35156398	-0.683284	0.035686	Promoter (<=1kb)	FXYD5
Peak_16654	chr7	99379213	99381518	-0.683022	0.00410474	Intron (ENST00000638617.1/10095, intron 8 of 16)	ARPC1B
Peak_4211	chr7	99557543	99559938	-0.682419	0.0016929	Promoter (<=1kb)	TMEM225B
Peak_4793	chr1	153920212	153922526	-0.681682	0.0377253	Promoter (<=1kb)	GATAD2B
Peak_4356	chr1	167713159	167715498	-0.681223	0.0210074	Distal Intergenic	MPZL1
Peak_3485	chr20	289487	291807	-0.679946	0.0420516	Promoter (<=1kb)	C20orf96
Peak_5902	chr7	47580564	47582826	-0.679441	0.0356266	Promoter (<=1kb)	TNS3
Peak_5590	chr13	46551974	46553088	-0.678735	0.0442376	Promoter (<=1kb)	LRCH1
Peak_14664	chr10	132329551	132330981	-0.678735	0.021069	Promoter (<=1kb)	STK32C
Peak_3163	chr3	124729778	124731440	-0.678108	0.0324641	Promoter (<=1kb)	UMPS
Peak_9629	chr17	31309706	31314490	-0.677601	0.0497491	Promoter (<=1kb)	EVI2B
Peak_1487	chr3	15792183	15798311	-0.676589	0.0016929	Promoter (<=1kb)	ANKRD28
Peak_5421	chr15	45198032	45201704	-0.676529	0.0182487	Promoter (<=1kb)	SHF
Peak_809	chr11	59809273	59811442	-0.675597	0.0149658	Promoter (<=1kb)	MRPL16
Peak_14909	chr17	57946505	57947515	-0.675356	0.0258184	Intron (ENST00000577830.6/404093, intron 1 of 10)	CUEDC1
Peak_513	chr6	42563554	42566361	-0.674887	0.0274057	Promoter (<=1kb)	UBR2
Peak_4086	chr11	4606559	4608672	-0.673299	0.0191329	Promoter (<=1kb)	TRIM68
Peak_3593	chr8	18209755	18210828	-0.672378	0.0283566	Promoter (<=1kb)	NAT1
Peak_12177	chr22	50620402	50622628	-0.671112	0.0375411	Distal Intergenic	ARSA
Peak_280	chr17	58328882	58338182	-0.670635	0.00768954	Promoter (<=1kb)	TSPOAP1-AS1
Peak_4580	chr15	51621049	51623854	-0.668674	0.0255968	Promoter (<=1kb)	DMXL2
Peak_6984	chr2	230415634	230418920	-0.668172	0.0134951	Promoter (<=1kb)	SP100
Peak_8876	chr14	50828742	50832379	-0.668155	0.0015416	Promoter (<=1kb)	NIN
Peak_4766	chr5	74684850	74686597	-0.667429	0.0188525	Promoter (<=1kb)	HEXB
Peak_7862	chr2	207166292	207167836	-0.664848	0.0314403	Promoter (<=1kb)	MIR7845
Peak_4409	chr20	47501145	47503623	-0.662377	0.0447709	Promoter (<=1kb)	NCOA3
Peak_1473	chr21	39181957	39184896	-0.661242	0.03097	Promoter (<=1kb)	PSMG1
Peak_2494	chr1	203795552	203797639	-0.659861	0.0412026	Promoter (<=1kb)	ZC3H11A
Peak_9544	chr16	69725869	69727547	-0.659357	0.0219548	Promoter (<=1kb)	NQO1
Peak_20742	chr5	68255367	68256136	-0.658934	0.0254025	Intron (ENST00000521381.6/5295, intron 2 of 15)	PIK3R1
Peak_9327	chr20	64076329	64080008	-0.658786	0.00382848	Promoter (<=1kb)	MIR6813
Peak_38261	chr3	42082049	42082494	-0.657556	0.0443298	Intron (ENST00000673621.2/22906, intron 1 of 16)	TRAK1
Peak_10518	chr7	44985267	44987306	-0.656889	0.0108715	Promoter (<=1kb)	SNHG15
Peak_23049	chr13	29817124	29818333	-0.655741	0.0474918	Intron (ENST00000380680.5/5412, intron 1 of 4)	UBL3
Peak_1408	chr13	52453989	52456849	-0.655007	0.0228653	Promoter (<=1kb)	CKAP2
Peak_20119	chr9	92740635	92741109	-0.653727	0.0378041	Intron (ENST00000375512.3/23299, intron 1 of 7)	BICD2
Peak_11225	chr1	202158735	202161649	-0.652928	0.0122031	Promoter (<=1kb)	PTPN7
Peak_2049	chr9	122263635	122266197	-0.652785	0.0490624	Promoter (<=1kb)	MRRF
Peak_11792	chr3	121659940	121661235	-0.652269	0.021597	Promoter (<=1kb)	HCLS1
Peak_11373	chr8	79783407	79784628	-0.650256	0.0371196	Promoter (<=1kb)	LINC01607
Peak_13118	chr10	8054558	8057505	-0.649875	0.044423	Promoter (<=1kb)	GATA3
Peak_6279	chr20	23419194	23421974	-0.649422	0.0430386	Promoter (<=1kb)	NAPB
Peak_1603	chr13	67227378	67231989	-0.648149	0.036435	Promoter (<=1kb)	PCDH9
Peak_12636	chr6	16699871	16701330	-0.643519	0.0169144	Intron (ENST00000244769.8/6310, intron 3 of 8)	ATXN1
Peak_6175	chr13	49584395	49586348	-0.643327	0.0292398	Promoter (<=1kb)	RCBTB1
Peak_7744	chr12	75389312	75391861	-0.643231	0.0310919	Promoter (<=1kb)	GLIPR1L2
Peak_609	chr6	109375564	109384080	-0.643028	0.00146484	Promoter (<=1kb)	CD164
Peak_29501	chr9	128691237	128691700	-0.64278	0.0175377	Promoter (<=1kb)	SET
Peak_4924	chr7	44795847	44798312	-0.642139	0.0440356	Promoter (<=1kb)	LOC105375260
Peak_1180	chr3	88057295	88062009	-0.641414	0.0192281	Promoter (<=1kb)	ZNF654
Peak_5696	chr5	62578694	62583230	-0.640664	0.0122432	Promoter (<=1kb)	LRRC70
Peak_353	chr3	94061928	94064173	-0.639485	0.0140382	Promoter (<=1kb)	DHFR2
Peak_19180	chr10	11527580	11529003	-0.637731	0.0152389	Intron (ENST00000609104.5/9712, intron 2 of 14)	USP6NL
Peak_11551	chr20	8213521	8214758	-0.635002	0.0216845	Intron (ENST00000637919.1/23236, intron 2 of 32)	PLCB1-IT1
Peak_3979	chr3	196638530	196642867	-0.634079	0.0156223	Promoter (<=1kb)	NRROS
Peak_14411	chr1	207958679	207960066	-0.633969	0.0401655	Promoter (<=1kb)	LINC02767
Peak_4095	chr7	8260564	8262857	-0.633737	0.0302608	Promoter (<=1kb)	ICA1-AS1
Peak_16494	chr4	3037867	3038715	-0.633722	0.022475	Exon (ENST00000398052.9/2868, exon 15 of 16)	HTT
Peak_19229	chr18	35045891	35046668	-0.632012	0.048232	Intron (ENST00000591734.5/10982, intron 2 of 5)	MAPRE2
Peak_1804	chr1	70352913	70355394	-0.631132	0.030711	Promoter (<=1kb)	HHLA3
Peak_2386	chr7	107742820	107745493	-0.630904	0.0447365	Promoter (<=1kb)	CBLL1-AS1
Peak_4347	chr17	30822148	30824735	-0.629893	0.0210137	Promoter (<=1kb)	CRLF3
Peak_5089	chr6	131134669	131136704	-0.62894	0.0317225	Promoter (<=1kb)	AKAP7
Peak_4774	chr8	129938429	129940822	-0.627435	0.0244044	Promoter (<=1kb)	CYRIB
Peak_781	chr7	87218377	87221096	-0.627063	0.0474498	Promoter (<=1kb)	TMEM243
Peak_1436	chr4	163493670	163496266	-0.625559	0.0247952	Promoter (<=1kb)	TMA16
Peak_9997	chr8	22578535	22581114	-0.624205	0.0370241	Promoter (<=1kb)	PDLIM2
Peak_2750	chr17	28947945	28951081	-0.623545	0.0257085	Promoter (<=1kb)	PIPOX
Peak_24567	chr12	93803202	93803949	-0.621788	0.046983	Intron (ENST00000549615.5/8738, intron 3 of 3)	CRADD
Peak_13049	chr19	15463274	15465175	-0.6195	0.0411774	Promoter (<=1kb)	RASAL3
Peak_7438	chr5	67003555	67008092	-0.618686	0.0101416	Promoter (<=1kb)	MAST4-AS1
Peak_2658	chr1	28580301	28583317	-0.617865	0.041863	Promoter (<=1kb)	SNORA44
Peak_7946	chr6	145734266	145737133	-0.617002	0.0171581	Promoter (<=1kb)	EPM2A
Peak_4283	chr5	32585438	32587331	-0.614402	0.045544	Promoter (<=1kb)	SUB1
Peak_1416	chr13	40770107	40771876	-0.612803	0.0480279	Promoter (<=1kb)	MRPS31
Peak_5850	chr7	141550592	141552423	-0.612749	0.048468	Promoter (<=1kb)	AGK-DT
Peak_8422	chr15	85689558	85692159	-0.612262	0.011274	Promoter (<=1kb)	AKAP13
Peak_831	chr4	151011631	151016849	-0.611495	0.00183321	Promoter (<=1kb)	LRBA
Peak_2371	chr6	153001235	153004007	-0.610748	0.0497775	Promoter (<=1kb)	MTRF1L
Peak_1816	chr8	89981109	89984204	-0.609839	0.0268805	Promoter (<=1kb)	NBN
Peak_3112	chr3	134484529	134487697	-0.608129	0.0143544	Promoter (<=1kb)	ANAPC13
Peak_1203	chr5	78507390	78511027	-0.605149	0.0112584	5' UTR	LHFPL2
Peak_5249	chr2	84904650	84907790	-0.605026	0.0380667	Promoter (<=1kb)	LOC105374836
Peak_7645	chr3	57691209	57693531	-0.604887	0.0266482	Promoter (<=1kb)	DENND6A-DT
Peak_11388	chr7	100582472	100584391	-0.603601	0.0445425	Promoter (<=1kb)	FBXO24
Peak_3360	chr12	124938001	124941352	-0.602817	0.0158316	Distal Intergenic	DHX37
Peak_22580	chr19	1037904	1038658	-0.601669	0.0476974	Promoter (1-2kb)	ABCA7
Peak_5557	chr1	150148755	150152274	-0.597628	0.0432342	Promoter (<=1kb)	PLEKHO1
Peak_1153	chr12	65168587	65173698	-0.596005	0.00658995	Promoter (<=1kb)	LEMD3
Peak_1188	chr4	82370752	82375933	-0.595653	0.030711	Promoter (<=1kb)	HNRNPD-DT
Peak_7185	chr12	120710420	120711878	-0.592992	0.0492609	Promoter (<=1kb)	UNC119B
Peak_1166	chr14	96361648	96364757	-0.590428	0.0459074	Promoter (<=1kb)	GSKIP
Peak_21686	chr9	114591794	114592994	-0.590181	0.0485974	Promoter (<=1kb)	ATP6V1G1
Peak_319	chr1	113928229	113932552	-0.589603	0.017722	Promoter (<=1kb)	HIPK1-AS1
Peak_15726	chr10	89206569	89208586	-0.589454	0.0210582	Promoter (<=1kb)	CH25H
Peak_5411	chr18	32017952	32020707	-0.587798	0.0453131	Promoter (<=1kb)	RNF125
Peak_3965	chr13	102595483	102598948	-0.586446	0.0410154	Promoter (<=1kb)	TPP2
Peak_5840	chr10	94361220	94363462	-0.584666	0.0488734	Promoter (<=1kb)	NOC3L
Peak_1819	chr12	105106928	105110600	-0.58323	0.0302627	Promoter (<=1kb)	ALDH1L2
Peak_18913	chr7	2037829	2038478	-0.583007	0.03949	Intron (ENST00000402746.5/8379, intron 10 of 16)	MAD1L1
Peak_1277	chr4	70992944	70997806	-0.579545	0.00221244	Promoter (<=1kb)	DCK
Peak_13117	chr10	11863596	11864274	-0.578726	0.0473519	Intron (ENST00000474155.1/254427, intron 3 of 3)	PROSER2-AS1
Peak_2080	chr8	55878166	55882488	-0.577367	0.0176677	Promoter (<=1kb)	LYN
Peak_8	chr4	105144976	105149268	-0.576249	0.00144418	Promoter (<=1kb)	TET2
Peak_11916	chr2	174632738	174635206	-0.571071	0.0106147	Promoter (<=1kb)	WIPF1
Peak_3370	chr11	75814154	75817556	-0.571058	0.0454909	Promoter (<=1kb)	UVRAG-DT
Peak_7774	chr17	3961296	3965599	-0.57073	0.0266489	Promoter (<=1kb)	ATP2A3
Peak_2198	chr2	55047365	55051791	-0.569757	0.00401322	Promoter (<=1kb)	RTN4
Peak_4050	chr1	39204195	39207596	-0.568006	0.00910805	Promoter (<=1kb)	MACF1
Peak_6819	chr1	197773028	197776092	-0.567477	0.0301311	Promoter (<=1kb)	DENND1B
Peak_35838	chr22	21569775	21570202	-0.562947	0.0347556	Intron (ENST00000458578.6/7332, intron 1 of 3)	UBE2L3
Peak_6237	chr3	169811335	169814145	-0.562334	0.0334774	Promoter (<=1kb)	LRRC34
Peak_4015	chr2	46941199	46943371	-0.552292	0.0341146	Promoter (<=1kb)	TTC7A
Peak_16599	chr7	23345698	23347945	-0.551982	0.018608	Promoter (<=1kb)	IGF2BP3
Peak_6468	chr16	25013746	25016211	-0.551469	0.00863307	Promoter (<=1kb)	ARHGAP17
Peak_6560	chr8	38901131	38903502	-0.550931	0.00550963	Promoter (<=1kb)	PLEKHA2
Peak_11506	chr6	157273787	157275561	-0.54819	0.0493487	Distal Intergenic	TMEM242
Peak_1044	chr19	55252972	55259096	-0.54327	0.00259917	Promoter (<=1kb)	PPP6R1
Peak_2200	chr8	66924099	66926219	-0.539277	0.0482498	Promoter (<=1kb)	SNHG6
Peak_1373	chr7	25123803	25126141	-0.538662	0.0491645	Promoter (<=1kb)	CYCS
Peak_1563	chr5	76951748	76956528	-0.537753	0.0351742	Promoter (<=1kb)	CRHBP
Peak_115	chr2	162315708	162319639	-0.528186	0.0132358	Promoter (<=1kb)	GCA
Peak_18510	chr1	19390649	19391996	-0.525198	0.0444388	Intron (ENST00000264202.8/832, intron 2 of 8)	CAPZB
Peak_6250	chr5	108727028	108729318	-0.51847	0.0352431	Promoter (<=1kb)	LINC01023
Peak_3107	chr5	154856995	154861602	-0.517553	0.0398107	Promoter (<=1kb)	FAXDC2
Peak_798	chr16	74998495	75003149	-0.51644	0.0180384	Promoter (<=1kb)	WDR59
Peak_8936	chr17	42286345	42290272	-0.504209	0.0440356	Promoter (<=1kb)	STAT5A
Peak_10712	chr3	195906354	195909575	-0.497474	0.0496723	Promoter (<=1kb)	TNK2-AS1
Peak_1517	chr9	131272987	131278964	-0.497411	0.021597	Promoter (<=1kb)	FAM78A
Peak_1862	chr7	16644127	16647972	-0.492955	0.0392461	Promoter (<=1kb)	BZW2
Peak_667	chr3	23915217	23919317	-0.492176	0.0222359	Promoter (<=1kb)	NKIRAS1
Peak_6392	chr5	135395793	135400645	-0.480724	0.0212513	Promoter (<=1kb)	MACROH2A1
Peak_1235	chr8	38786486	38789320	-0.473495	0.0149931	Promoter (<=1kb)	TACC1
Peak_7148	chr13	40978711	40984587	-0.471677	0.045245	Promoter (<=1kb)	ELF1
Peak_2363	chr20	21302283	21305169	-0.470374	0.0268313	Promoter (<=1kb)	XRN2
Peak_8291	chr6	25135647	25139459	-0.466108	0.0399002	Promoter (<=1kb)	CMAHP
Peak_2523	chr12	89523475	89526743	0.401876	0.0454431	Promoter (<=1kb)	POC1B-GALNT4
Peak_2285	chr1	154951786	154956867	0.409873	0.0462849	Promoter (<=1kb)	PBXIP1
Peak_10266	chr17	76500317	76502155	0.423749	0.0319798	Promoter (<=1kb)	RHBDF2
Peak_1535	chr1	109618905	109622672	0.431208	0.0196434	Promoter (<=1kb)	AMPD2
Peak_10018	chr15	90929186	90930851	0.446995	0.0384573	Promoter (<=1kb)	UNC45A
Peak_4005	chr18	9474344	9477938	0.447944	0.0462599	Promoter (<=1kb)	RALBP1
Peak_6324	chr17	76725435	76728309	0.453006	0.0384573	Promoter (<=1kb)	METTL23
Peak_15668	chr15	90839557	90840313	0.470041	0.0410511	Promoter (<=1kb)	LOC105370969
Peak_8335	chr14	73785035	73788602	0.47277	0.0243617	Promoter (<=1kb)	LOC100506476
Peak_2631	chr5	41869132	41871217	0.474476	0.0388777	Promoter (<=1kb)	OXCT1-AS1
Peak_6960	chr7	73577584	73579491	0.476406	0.030695	Promoter (<=1kb)	TBL2
Peak_2773	chr1	204515886	204517902	0.476446	0.0453161	Promoter (<=1kb)	MDM4
Peak_2377	chr8	38104284	38106708	0.477298	0.0455656	Promoter (<=1kb)	ASH2L
Peak_19723	chr12	120537538	120539166	0.47891	0.0325654	Intron (ENST00000542438.1/9921, intron 2 of 4)	RNF10
Peak_4611	chr10	69317744	69320225	0.484032	0.0227962	Promoter (<=1kb)	HK1
Peak_2857	chr2	39435134	39438488	0.487989	0.0489789	Promoter (<=1kb)	MAP4K3-DT
Peak_2453	chr2	97644952	97647221	0.48828	0.0309938	Promoter (<=1kb)	COX5B
Peak_11294	chr19	14432699	14434762	0.48903	0.0195149	Promoter (<=1kb)	PKN1
Peak_1080	chr16	70522347	70525729	0.490815	0.0116747	Promoter (<=1kb)	SF3B3
Peak_7850	chr6	158559448	158561890	0.490995	0.0163703	Promoter (<=1kb)	TMEM181
Peak_7679	chr16	48365481	48367019	0.494851	0.043934	Promoter (<=1kb)	SIAH1
Peak_6720	chr12	750781	756038	0.499601	0.0324641	Promoter (<=1kb)	WNK1
Peak_12238	chr5	176364920	176366565	0.503552	0.0433616	Promoter (<=1kb)	ARL10
Peak_7088	chr3	3126234	3128105	0.505332	0.0361979	Promoter (<=1kb)	IL5RA
Peak_999	chr8	37761792	37763824	0.506973	0.0174037	Promoter (<=1kb)	PLPBP
Peak_11122	chr14	92513014	92515059	0.514455	0.0483882	Promoter (<=1kb)	RIN3
Peak_4641	chr18	21599150	21601277	0.520506	0.0412033	Promoter (<=1kb)	ESCO1
Peak_3908	chr11	78077946	78080458	0.524092	0.0359002	Promoter (<=1kb)	NDUFC2-KCTD14
Peak_7255	chr22	41681466	41683121	0.527754	0.027955	Promoter (<=1kb)	SNU13
Peak_13744	chr12	6383298	6385038	0.529219	0.0401266	Promoter (<=1kb)	LTBR
Peak_6043	chr2	24083337	24085678	0.529878	0.0260985	Promoter (<=1kb)	TP53I3
Peak_7833	chr6	13272624	13275798	0.530318	0.0186802	Promoter (<=1kb)	TBC1D7-LOC100130357
Peak_13823	chr9	112173898	112175964	0.533461	0.00700654	Promoter (<=1kb)	SUSD1
Peak_5836	chr6	136821798	136823491	0.533929	0.0443629	Promoter (<=1kb)	PEX7
Peak_11311	chr20	44531421	44533235	0.53501	0.0484185	Promoter (<=1kb)	PKIG
Peak_3891	chr9	136409492	136411877	0.539331	0.0228842	Promoter (<=1kb)	ENTR1
Peak_1543	chr1	161176284	161178025	0.542689	0.0489789	Promoter (<=1kb)	B4GALT3
Peak_4651	chr22	31944448	31946556	0.544113	0.0404393	Promoter (<=1kb)	YWHAH-AS1
Peak_7529	chr5	54517676	54519217	0.544947	0.0349139	Promoter (<=1kb)	SNX18
Peak_6621	chr19	47777999	47779642	0.546722	0.0314403	Promoter (<=1kb)	SELENOW
Peak_342	chr19	18918309	18920789	0.547333	0.0353185	Promoter (<=1kb)	COPE
Peak_10718	chr2	74548425	74550326	0.547868	0.044997	Promoter (<=1kb)	DOK1
Peak_3356	chr1	212413689	212415315	0.549649	0.045283	Promoter (<=1kb)	PACC1
Peak_8317	chr8	95024435	95026161	0.552498	0.026034	Promoter (<=1kb)	NDUFAF6
Peak_4907	chr19	8444278	8446857	0.552534	0.0473528	Promoter (<=1kb)	HNRNPM
Peak_6917	chr17	75978414	75980484	0.552683	0.0283901	Promoter (<=1kb)	TEN1
Peak_26675	chr10	79094344	79094832	0.554509	0.0491546	Intron (ENST00000334512.10/57178, intron 1 of 24)	ZMIZ1
Peak_3843	chr1	109282439	109284149	0.556845	0.0374228	Promoter (<=1kb)	PSRC1
Peak_662	chr3	184016850	184018630	0.558812	0.0361287	Promoter (<=1kb)	ABCC5
Peak_5370	chr3	186929949	186933590	0.559274	0.0103136	Promoter (<=1kb)	ST6GAL1
Peak_8597	chr5	891635	893620	0.562532	0.0201515	Promoter (<=1kb)	BRD9
Peak_7622	chr19	1407698	1409719	0.566666	0.0495909	Promoter (<=1kb)	DAZAP1
Peak_4705	chr13	112586521	112589077	0.566673	0.00715497	Promoter (<=1kb)	TUBGCP3
Peak_1860	chr15	83010428	83012707	0.571026	0.0118747	Promoter (<=1kb)	C15orf40
Peak_7581	chr19	19515531	19517094	0.573886	0.0245213	Promoter (<=1kb)	YJEFN3
Peak_19250	chr1	35120431	35121227	0.575295	0.0361519	Distal Intergenic	ZMYM1
Peak_4898	chr17	45146846	45148296	0.576605	0.0435275	Promoter (<=1kb)	HEXIM1
Peak_57	chr21	33914731	33916462	0.577028	0.0466394	Promoter (<=1kb)	LINC00649
Peak_15593	chr6	15244157	15245191	0.579524	0.0232212	Promoter (<=1kb)	JARID2
Peak_6286	chr6	144149767	144152057	0.580731	0.0158161	Promoter (<=1kb)	STX11
Peak_13850	chr2	47783923	47784951	0.580745	0.0482753	Promoter (<=1kb)	MSH6
Peak_7046	chr10	119871610	119874172	0.580783	0.0150954	Promoter (<=1kb)	MCMBP
Peak_10440	chr16	4613235	4615435	0.580817	0.0203823	Promoter (<=1kb)	UBALD1
Peak_29464	chr21	39385584	39386377	0.581466	0.0434719	Promoter (<=1kb)	GET1
Peak_19867	chr17	74758241	74759536	0.584908	0.0473238	Intron (ENST00000262613.10/9368, intron 1 of 5)	SLC9A3R1
Peak_3877	chr3	47512382	47514059	0.587066	0.0416413	Promoter (<=1kb)	ELP6
Peak_6637	chr6	43052909	43054384	0.587437	0.0488385	Promoter (<=1kb)	CUL7
Peak_11295	chr19	18588130	18590200	0.587515	0.0285855	Promoter (<=1kb)	REX1BD
Peak_3524	chr19	42074977	42077746	0.587619	0.0128158	Promoter (<=1kb)	ZNF574
Peak_16914	chr12	46382514	46383379	0.588213	0.0157827	Promoter (<=1kb)	LOC100288798
Peak_3271	chr20	63657364	63659638	0.58959	0.0197783	Promoter (<=1kb)	RTEL1-TNFRSF6B
Peak_12183	chr1	23867423	23869209	0.589713	0.0492603	Promoter (<=1kb)	FUCA1
Peak_5150	chr18	11907466	11909759	0.59017	0.0156342	Promoter (<=1kb)	MPPE1
Peak_5982	chr16	30075366	30077160	0.590329	0.0204034	Promoter (<=1kb)	PPP4C
Peak_3078	chr12	120534013	120537350	0.591042	0.00337822	Promoter (<=1kb)	COQ5
Peak_4846	chr17	28598161	28600271	0.591909	0.0341009	Promoter (<=1kb)	SPAG5-AS1
Peak_20099	chr1	156813367	156814408	0.592725	0.0443765	Promoter (<=1kb)	SH2D2A
Peak_14606	chr22	38569499	38570216	0.595705	0.0415379	Promoter (<=1kb)	DMC1
Peak_5186	chr16	88972350	88977690	0.596493	0.0276338	Promoter (<=1kb)	CBFA2T3
Peak_14180	chr8	28400804	28401797	0.597715	0.00827558	Intron (ENST00000521548.5/55893, intron 7 of 15)	ZNF395
Peak_8630	chr6	52575756	52577054	0.597987	0.00807955	Promoter (<=1kb)	TRAM2-AS1
Peak_306	chr5	10248910	10252009	0.598038	0.0108567	Promoter (<=1kb)	ATPSCKMT
Peak_8217	chr19	6766670	6768340	0.598079	0.048468	Promoter (<=1kb)	SH2D3A
Peak_1709	chr14	49632052	49635823	0.599855	0.0080176	Promoter (<=1kb)	DNAAF2
Peak_7606	chr12	10212122	10214750	0.600381	0.0497118	Promoter (<=1kb)	GABARAPL1
Peak_6430	chr1	116569575	116571759	0.600814	0.0272086	Promoter (<=1kb)	CD58
Peak_877	chr18	12990179	12992611	0.60105	0.0398294	Promoter (<=1kb)	CEP192
Peak_8920	chr4	10114923	10116948	0.601856	0.0119564	Promoter (<=1kb)	WDR1
Peak_3658	chr5	181245316	181247470	0.602108	0.013223	Promoter (<=1kb)	CTC-338M12.4
Peak_16149	chr2	231661952	231662946	0.602233	0.0150696	Distal Intergenic	PTMA
Peak_3135	chr16	67480196	67483020	0.604151	0.00985598	Promoter (<=1kb)	ATP6V0D1-DT
Peak_9090	chr19	18831451	18834356	0.604434	0.0480279	Promoter (<=1kb)	UPF1
Peak_6443	chr11	65133012	65136147	0.606459	0.0161366	Promoter (<=1kb)	SYVN1
Peak_9203	chr1	26169615	26170767	0.607223	0.0271503	Promoter (<=1kb)	ZNF593
Peak_1406	chr21	38493327	38499759	0.610003	0.0486548	Promoter (<=1kb)	ERG
Peak_9428	chr15	40107753	40109775	0.612725	0.0418968	Promoter (<=1kb)	BMF
Peak_42382	chr10	101695525	101695850	0.61317	0.0435275	Promoter (<=1kb)	FBXW4
Peak_11446	chr1	16913389	16915024	0.613298	0.0405111	Intron (ENST00000466256.6/9696, intron 1 of 8)	CROCC
Peak_5106	chr8	133071631	133075249	0.615104	0.0348742	Promoter (<=1kb)	SLA
Peak_9121	chr1	244460898	244461928	0.617851	0.0435275	Promoter (<=1kb)	CATSPERE
Peak_53300	chr12	121810764	121811145	0.619704	0.0178104	Exon (ENST00000604567.6/23067, exon 6 of 17)	SETD1B
Peak_24121	chr1	156502249	156503770	0.61984	0.0360972	Promoter (1-2kb)	MEF2D
Peak_3383	chr17	50396169	50398122	0.622392	0.0194851	Promoter (<=1kb)	LRRC59
Peak_2579	chr2	231960848	231962464	0.623303	0.0210386	Promoter (<=1kb)	DIS3L2
Peak_4734	chr1	37513612	37515638	0.623444	0.00526303	Promoter (<=1kb)	MEAF6
Peak_26494	chr14	100066967	100067489	0.624414	0.0374228	Promoter (<=1kb)	EVL
Peak_15257	chr17	82593352	82594008	0.624627	0.0254025	Promoter (<=1kb)	FOXK2
Peak_10739	chr12	132490464	132492216	0.625046	0.0158316	Promoter (<=1kb)	FBRSL1
Peak_20476	chr17	30824868	30825163	0.625218	0.0477128	Promoter (<=1kb)	CRLF3
Peak_17434	chr1	27659461	27660025	0.630261	0.0374228	Distal Intergenic	LINC02574
Peak_14174	chr1	110672016	110675458	0.630573	0.0152389	Promoter (<=1kb)	KCNA3
Peak_13303	chr16	87959383	87960480	0.630856	0.0201515	Promoter (<=1kb)	BANP
Peak_5644	chr19	11345155	11347274	0.632252	0.0463789	Promoter (<=1kb)	CCDC159
Peak_10763	chr19	13905680	13907123	0.632431	0.0472528	Promoter (<=1kb)	CC2D1A
Peak_11697	chr22	50524468	50527553	0.632544	0.0282264	Promoter (<=1kb)	TYMP
Peak_5689	chr11	94767698	94770050	0.632583	0.0426731	Promoter (<=1kb)	AMOTL1
Peak_2129	chr6	8434609	8436100	0.633478	0.0459074	Promoter (<=1kb)	LOC100506207
Peak_11645	chr12	51024516	51026856	0.633539	0.0280807	Promoter (<=1kb)	SLC11A2
Peak_13900	chr22	50186163	50187164	0.636713	0.0423976	Promoter (<=1kb)	TRABD
Peak_3238	chr13	97221700	97225924	0.637004	0.017306	Promoter (<=1kb)	MBNL2
Peak_58	chr17	32349195	32352037	0.637101	0.00733441	Promoter (<=1kb)	C17orf75
Peak_28171	chr12	914579	914796	0.639379	0.0276239	Promoter (<=1kb)	RAD52
Peak_3359	chr4	184536564	184538555	0.640067	0.0373894	Promoter (<=1kb)	LINC02427
Peak_6614	chr16	58127153	58130076	0.640913	0.0257085	Promoter (<=1kb)	LOC101927556
Peak_15578	chr22	44667773	44669626	0.640974	0.0316217	Promoter (<=1kb)	PRR5
Peak_27178	chr16	1960548	1961416	0.642643	0.0142335	Promoter (<=1kb)	NDUFB10
Peak_44002	chr19	11337371	11337713	0.642926	0.0295458	Promoter (1-2kb)	RAB3D
Peak_5282	chr22	21865712	21867722	0.643666	0.00659384	Promoter (<=1kb)	MAPK1
Peak_3402	chr3	196079692	196083037	0.644922	0.024398	Promoter (<=1kb)	TFRC
Peak_6514	chr17	75393310	75394966	0.646764	0.0353563	Promoter (<=1kb)	GRB2
Peak_6946	chr7	66681220	66683160	0.649064	0.0283566	Promoter (<=1kb)	RABGEF1
Peak_2427	chr20	32358706	32360586	0.650097	0.0361437	Promoter (<=1kb)	ASXL1
Peak_30566	chr1	38000651	38001069	0.650548	0.0376319	Promoter (1-2kb)	FHL3
Peak_11223	chr16	70437324	70438984	0.651962	0.0384959	Promoter (<=1kb)	ST3GAL2
Peak_29314	chr16	75003232	75003684	0.652177	0.00689813	Promoter (<=1kb)	ZNRF1
Peak_10747	chr16	2250724	2252233	0.653773	0.0249412	Promoter (<=1kb)	ECI1
Peak_15110	chr15	50115008	50116915	0.654563	0.0256933	Promoter (<=1kb)	ATP8B4
Peak_2357	chr17	75011976	75013794	0.657332	0.0387619	Promoter (<=1kb)	MRPL58
Peak_12065	chr7	101743184	101744307	0.657536	0.049178	Distal Intergenic	CUX1
Peak_12472	chr3	161104332	161105680	0.658841	0.00681304	Promoter (<=1kb)	NMD3
Peak_6008	chr1	3856251	3858319	0.659571	0.0127097	Promoter (<=1kb)	DFFB
Peak_7639	chr20	34302248	34303809	0.659864	0.0411314	Promoter (<=1kb)	AHCY
Peak_9736	chr11	6611224	6613362	0.660323	0.0157827	Promoter (<=1kb)	TAF10
Peak_12637	chr14	90758631	90759430	0.660513	0.0345626	Exon (ENST00000663297.1/ENST00000663297.1, exon 1 of 2)	TTC7B
Peak_35000	chr1	228085059	228085546	0.662237	0.0357814	Promoter (1-2kb)	ARF1
Peak_14961	chr11	65523923	65524808	0.662642	0.0158522	Promoter (<=1kb)	SCYL1
Peak_1486	chr14	102361874	102363975	0.665066	0.030767	Promoter (<=1kb)	CINP
[truncated: 1,373 more rows]
