# Supplementary material for: Classification of Acute Myeloid Leukemia by Cell-Free DNA 5-Hydroxymethylcytosine
Source: Genes (Basel). 2023 May 28;14(6):1180. doi: 10.3390/genes14061180 (PMC10298116; doi:10.3390/genes14061180)
Supplement: Supplementary file 1 [file genes-14-01180-s001.zip › Table S4 List of genes with differentially hydroxymethylated regions.xlsx]

## Sheet: Sheet1
Region ID	Chromosome	Start	End	log2FC C2 vs C1	-LOG10(FDR) C2 vs C1	log2FC C3vs C1	-LOG10(FDR) C3 vs C1	Gene name	AML related	Differentially expressed in mRNA level
Peak_25875	chr1	1034131	1034419	-1.57617	1.47249	-	-	AGRN	No	No
Peak_27524	chr1	1206162	1206906	-1.22807	1.61644	-	-	TNFRSF18	Yes	Yes
Peak_4319	chr1	1230771	1232035	-	-	1.09004	1.90699	SDF4	No	Yes
Peak_6584	chr1	1272571	1273913	1.32253	2.18871	1.18658	1.78993	UBE2J2	Yes	Yes
Peak_12906	chr1	1308584	1309468	-	-	0.8972	1.43971	PUSL1	No	Yes
Peak_9594	chr1	1348175	1349151	-	-	1.41646	3.19955	DVL1	No	Yes
Peak_4320	chr1	1398036	1399417	0.814932	1.9466	0.757789	1.70992	CCNL2	No	No
Peak_19233	chr1	1435135	1435903	-	-	0.835563	1.76553	VWA1	No	NA
Peak_19765	chr1	1540720	1541091	-	-	1.00666	2.25888	TMEM240	No	No
Peak_27530	chr1	1600335	1600754	-	-	1.56717	2.7189	LOC105378586	No	NA
Peak_6298	chr1	1614053	1616965	0.561411	1.31076	0.754649	2.07057	MIB2	No	No
Peak_22614	chr1	1782389	1783018	-	-	1.91395	5.03141	NADK	No	No
Peak_24641	chr1	2133589	2133928	-	-	0.979895	2.15583	PRKCZ	Yes	No
Peak_12715	chr1	2189659	2190163	-	-	1.56932	3.80039	FAAP20	No	Yes
Peak_19245	chr1	2204312	2204864	-	-	1.14411	2.2653	FAAP20	No	Yes
Peak_13328	chr1	2228731	2231520	0.798174	2.81459	1.3933	5.93604	SKI	Yes	NA
Peak_21772	chr1	2290960	2291565	-0.890065	1.70443	-0.783738	1.39497	SKI	Yes	NA
Peak_19771	chr1	2315345	2315824	-1.03237	1.60637	-	-	SKI	Yes	NA
Peak_26607	chr1	3155444	3156043	-	-	1.63614	3.28936	MIR4251	No	NA
Peak_22627	chr1	3170763	3171703	-1.77193	2.45338	-	-	MIR4251	No	NA
Peak_23192	chr1	3174691	3175685	-1.01331	1.8731	-	-	MIR4251	No	NA
Peak_28708	chr1	3182929	3183783	-	-	0.981464	1.66474	PRDM16	Yes	No
Peak_30387	chr1	3188655	3189019	-	-	1.21379	1.7325	PRDM16	Yes	No
Peak_12915	chr1	3746520	3747403	-	-	0.910726	2.17808	TP73-AS1	No	Yes
Peak_17833	chr1	3772746	3773727	-	-	1.36474	4.20627	SMIM1	No	Yes
Peak_6008	chr1	3856251	3858319	-	-	0.659571	1.89587	DFFB	No	No
Peak_13626	chr1	6393865	6394497	-	-	1.12715	2.38084	ACOT7	No	Yes
Peak_23565	chr1	6465786	6466064	-2.01468	2.13542	-1.50183	1.58992	TNFRSF25	Yes	Yes
Peak_32157	chr1	6588987	6589436	-	-	0.67242	1.46104	ZBTB48	No	NA
Peak_9910	chr1	6603016	6604239	0.889341	1.64143	1.26944	3.56646	KLHL21	No	No
Peak_24325	chr1	6743534	6744117	-1.29438	1.51092	-	-	LINC01672	No	NA
Peak_14952	chr1	7679826	7681293	-1.04967	1.74744	-	-	CAMTA1	Yes	Yes
Peak_19060	chr1	8395505	8396097	-	-	-1.05688	1.58816	RERE	No	No
Peak_34493	chr1	8427751	8428281	-1.61236	2.80626	-1.1731	1.77168	RERE-AS1	No	NA
Peak_38855	chr1	9020211	9020519	-	-	-1.47046	1.49478	SLC2A7	No	NA
Peak_13115	chr1	9626419	9627221	-	-	-1.05279	1.40256	TMEM201	No	No
Peak_8178	chr1	9651083	9654747	-	-	1.00138	3.83025	PIK3CD	Yes	Yes
Peak_15075	chr1	9687030	9688471	-	-	0.771927	1.58055	PIK3CD-AS2	No	Yes
Peak_17444	chr1	9688952	9689427	-	-	1.40378	2.38671	PIK3CD	Yes	Yes
Peak_23566	chr1	9689891	9690385	0.838688	1.533	1.23063	4.05889	PIK3CD	Yes	Yes
Peak_9119	chr1	10209717	10211859	-	-	1.02628	2.03358	KIF1B	Yes	NA
Peak_5851	chr1	10693292	10694511	-	-	-1.16505	1.48234	CASZ1	Yes	Yes
Peak_29649	chr1	10716425	10716657	-1.6667	2.04301	-	-	CASZ1	Yes	Yes
Peak_27520	chr1	10888369	10888596	-1.62054	1.49283	-	-	C1orf127	No	No
Peak_7041	chr1	11680279	11682028	-	-	0.720039	1.64927	MAD2L2	No	Yes
Peak_9226	chr1	11735778	11737320	-	-	1.17246	2.55241	AGTRAP	No	No
Peak_6429	chr1	11804964	11807202	-	-	0.751261	1.3769	CLCN6	No	No
Peak_15482	chr1	11925638	11926836	1.47564	3.64712	-	-	KIAA2013	No	No
Peak_5017	chr1	11979635	11981237	0.739984	1.64143	0.856231	2.4273	MFN2	Yes	Yes
Peak_6583	chr1	12229977	12231476	1.24145	1.50166	1.37892	2.38724	VPS13D	Yes	No
Peak_24189	chr1	12344363	12345574	-1.27269	4.26359	-1.6684	5.39391	VPS13D	Yes	No
Peak_18703	chr1	12594922	12595348	-1.13836	1.79075	-	-	DHRS3	No	Yes
Peak_23544	chr1	12616438	12616706	-	-	1.63009	1.3562	DHRS3	No	Yes
Peak_20898	chr1	15156100	15156546	-1.003	1.57876	-	-	TMEM51	No	NA
Peak_34975	chr1	15386277	15386646	-1.72628	2.38609	-	-	FHAD1	No	Yes
Peak_8808	chr1	15408982	15412502	-0.450202	1.50451	-	-	EFHD2-AS1	No	NA
Peak_19179	chr1	15697077	15697577	-1.17087	1.67552	-1.00335	1.83514	PLEKHM2	Yes	No
Peak_14897	chr1	15829888	15830432	-	-	-1.28071	2.976	SPEN	Yes	NA
Peak_12106	chr1	16215940	16217456	-1.08867	3.38145	-	-	ANO7L1	No	NA
Peak_2561	chr1	16367136	16368982	-	-	-1.20008	2.16939	SZRD1	No	No
Peak_11446	chr1	16913389	16915024	-	-	0.613298	1.39243	CROCC	No	No
Peak_16577	chr1	16921482	16922276	-1.22043	2.80626	-	-	CROCC	No	No
Peak_22499	chr1	18907688	18908311	-1.28365	1.66466	-	-	IFFO2	No	Yes
Peak_27287	chr1	18923980	18924243	-1.53929	2.35477	-1.30689	2.18461	IFFO2	No	Yes
Peak_27377	chr1	18927344	18927748	-1.04424	1.74598	-	-	IFFO2	No	Yes
Peak_35657	chr1	18928275	18928495	-1.14099	1.45468	-	-	IFFO2	No	Yes
Peak_12181	chr1	19311218	19313231	-	-	0.777713	2.13097	SLC66A1	No	NA
Peak_18510	chr1	19390649	19391996	-0.734169	2.31638	-0.525198	1.35224	CAPZB	No	No
Peak_29356	chr1	19462886	19463339	-0.944773	1.73416	-	-	MICOS10	No	NA
Peak_20356	chr1	19477176	19478048	-1.47363	3.17889	-1.72386	5.42803	MICOS10	No	NA
Peak_10722	chr1	19644300	19646277	-0.694384	1.63386	-	-	NBL1	No	No
Peak_9452	chr1	21174668	21176234	0.955292	2.04267	-	-	EIF4G3	No	Yes
Peak_15086	chr1	21334445	21335489	-0.854158	1.36159	-	-	ECE1	Yes	Yes
Peak_30385	chr1	21622744	21622997	-	-	1.40399	2.09261	RAP1GAP	Yes	Yes
Peak_25324	chr1	22040147	22040413	1.30058	2.19934	1.16824	2.04057	CDC42	Yes	No
Peak_19731	chr1	22089557	22090448	-1.16839	1.98754	-1.31725	3.07157	CDC42	Yes	No
Peak_5415	chr1	22451548	22453164	-	-	1.08315	3.37824	ZBTB40	Yes	No
Peak_11035	chr1	23799523	23801614	-	-	0.884477	1.94592	GALE	No	Yes
Peak_25123	chr1	23825825	23826141	1.21572	3.37324	-	-	HMGCL	No	Yes
Peak_12183	chr1	23867423	23869209	-	-	0.589713	1.3075	FUCA1	No	No
Peak_2657	chr1	23978410	23980395	-	-	-0.709573	1.35034	SRSF10	No	No
Peak_20345	chr1	24705463	24706044	-	-	1.04344	1.68562	SRRM1	Yes	No
Peak_3628	chr1	24745222	24747083	1.01683	1.9422	1.12192	2.95706	CLIC4	No	No
Peak_14209	chr1	25543578	25544897	-	-	1.0999	2.76298	LDLRAP1	No	Yes
Peak_8583	chr1	25858742	25860724	0.588828	1.96872	-	-	AUNIP	No	Yes
Peak_26442	chr1	25861049	25861714	-1.03608	1.72787	-	-	AUNIP	No	Yes
Peak_24648	chr1	25923666	25923914	1.15785	1.44922	-	-	STMN1	Yes	Yes
Peak_23429	chr1	26126551	26126976	-	-	-0.831367	1.4456	PDIK1L	Yes	Yes
Peak_9203	chr1	26169615	26170767	-	-	0.607223	1.56623	ZNF593	No	Yes
Peak_30708	chr1	26237822	26238023	-	-	-0.978179	1.40968	CEP85	No	Yes
Peak_22354	chr1	26700805	26701003	-1.75104	1.41017	-1.62712	1.42569	ARID1A	Yes	Yes
Peak_10414	chr1	26921187	26922867	0.658247	1.39232	-	-	NUDC	No	Yes
Peak_15441	chr1	27155220	27155699	1.10085	1.36377	1.22436	2.05632	SLC9A1	Yes	Yes
Peak_12809	chr1	27233887	27234414	-	-	0.721152	1.36834	WDTC1-DT	No	NA
Peak_29687	chr1	27349255	27349506	-	-	0.943409	1.96895	SYTL1	No	Yes
Peak_16390	chr1	27392572	27393192	-1.4582	1.41989	-	-	GPR3	No	Yes
Peak_30993	chr1	27403179	27403813	-1.24725	3.64712	-0.79643	1.60818	GPR3	No	Yes
Peak_22102	chr1	27428533	27429316	-1.09575	1.91098	-1.13894	2.63187	GPR3	No	Yes
Peak_29688	chr1	27599380	27599782	-	-	-1.48174	2.0202	AHDC1	No	No
Peak_17434	chr1	27659461	27660025	-	-	0.630261	1.42686	LINC02574	No	NA
Peak_17012	chr1	27660218	27660662	-	-	0.853511	2.03008	LINC02574	No	NA
Peak_1505	chr1	27772211	27774410	-	-	-1.25947	3.35304	STX12	No	NA
Peak_21358	chr1	28175824	28177060	0.951489	2.637	1.32021	4.4892	PTAFR	No	Yes
Peak_25087	chr1	28417033	28417939	-1.30706	1.62547	-1.78364	3.23872	PHACTR4	No	Yes
Peak_2658	chr1	28580301	28583317	-0.677157	1.37181	-0.617865	1.37817	SNORA44	No	NA
Peak_28659	chr1	28927740	28928080	-	-	-1.65941	1.66802	EPB41	No	Yes
Peak_24649	chr1	29123218	29123698	-1.4998	1.62181	-	-	TMEM200B	No	No
Peak_61095	chr1	30744007	30744395	-	-	0.828277	2.27782	LAPTM5	No	Yes
Peak_25466	chr1	30753327	30754235	-	-	0.959953	2.94934	LAPTM5	No	Yes
Peak_21672	chr1	31373854	31374057	-	-	-1.41858	1.38075	FABP3	No	NA
Peak_44993	chr1	31714415	31714929	-	-	-1.44248	1.43122	COL16A1	Yes	NA
Peak_21777	chr1	31944042	31945120	-0.539894	1.30244	-	-	PTP4A2	No	Yes
Peak_10724	chr1	32180015	32181028	0.92992	2.13561	-	-	TXLNA	Yes	No
Peak_9843	chr1	32205335	32206487	-	-	1.02028	1.57267	IQCC	No	Yes
Peak_12271	chr1	32240175	32241363	-1.33338	2.86431	-	-	MTMR9LP	No	No
Peak_13543	chr1	32351606	32352254	-	-	1.09565	1.6573	TSSK3	No	NA
Peak_4600	chr1	32393302	32395465	0.759693	1.45064	-	-	BSDC1	No	NA
Peak_1783	chr1	32539764	32541059	-1.13571	3.50082	-	-	ZBTB8A	No	Yes
Peak_13729	chr1	32702201	32703610	-0.85976	1.78787	-	-	SYNC	No	No
Peak_35426	chr1	32725038	32725274	-1.4758	2.20468	-	-	KIAA1522	Yes	Yes
Peak_12159	chr1	32741956	32743048	-1.10205	1.81154	-	-	KIAA1522	Yes	Yes
Peak_32423	chr1	32924824	32925344	-1.70114	2.05076	-	-	TMEM54	No	Yes
Peak_5847	chr1	33035938	33037366	0.971227	1.90972	-	-	AK2	No	Yes
Peak_39463	chr1	34928790	34929604	-1.83777	1.50673	-	-	DLGAP3	Yes	NA
Peak_19250	chr1	35120431	35121227	-	-	0.575295	1.44187	ZMYM1	Yes	No
Peak_19079	chr1	35264824	35265501	-	-	-1.43729	2.08776	ZMYM4	No	NA
Peak_7751	chr1	35808200	35809735	0.827199	1.3937	-	-	AGO4	No	Yes
Peak_8922	chr1	36306273	36307601	-	-	0.667381	1.41626	SH3D21	No	NA
Peak_12352	chr1	36320333	36322239	-0.860305	3.24091	-	-	SH3D21	No	NA
Peak_13332	chr1	36322930	36323651	-1.62172	1.73572	-	-	EVA1B	No	No
Peak_33620	chr1	37472334	37472579	-	-	1.00825	1.60145	LOC107984942	No	NA
Peak_28934	chr1	37486730	37486984	-1.62265	1.59947	-	-	ZC3H12A	No	No
Peak_4734	chr1	37513612	37515638	-	-	0.623444	2.27876	MEAF6	No	Yes
Peak_7888	chr1	37945985	37947449	-	-	0.86995	1.3516	INPP5B	No	Yes
Peak_828	chr1	37988928	37990727	-	-	0.755744	1.43224	SF3A3	No	Yes
Peak_30566	chr1	38000651	38001069	-	-	0.650548	1.42444	FHL3	No	No
Peak_12353	chr1	39104924	39107018	-	-	1.61678	4.20659	MACF1	Yes	Yes
Peak_4050	chr1	39204195	39207596	-0.543846	1.79543	-0.568006	2.04057	MACF1	Yes	Yes
Peak_15424	chr1	39214974	39215791	-1.20479	3.16639	-0.820487	2.00768	MACF1	Yes	Yes
Peak_15429	chr1	39215835	39217207	-1.27182	2.99984	-1.51115	5.76461	MACF1	Yes	Yes
Peak_11099	chr1	39408969	39410177	1.19741	2.06516	1.82136	5.29318	MACF1	Yes	Yes
Peak_44408	chr1	39954718	39955045	-	-	0.987972	1.89134	MFSD2A	No	No
Peak_878	chr1	40039209	40042035	-	-	-0.708086	1.96682	CAP1	No	No
Peak_2247	chr1	40373620	40375723	-	-	-0.85897	1.96859	SMAP2	No	No
Peak_18622	chr1	40385936	40386658	-	-	-0.895602	1.61757	SMAP2	No	No
Peak_9086	chr1	40708608	40710153	-	-	1.24487	1.77472	NFYC	No	No
Peak_13689	chr1	41516319	41516924	-1.71688	3.18483	-	-	EDN2	Yes	NA
Peak_22492	chr1	41738700	41739143	-0.838899	1.33003	-	-	HIVEP3	No	Yes
Peak_10073	chr1	41916746	41919043	-0.726395	2.19679	-	-	HIVEP3	No	Yes
Peak_18557	chr1	41919839	41920231	-	-	-1.20125	1.84015	HIVEP3	No	Yes
Peak_16586	chr1	42319404	42320410	-0.897011	1.30853	-1.00775	2.09167	FOXJ3	No	No
Peak_24097	chr1	43058696	43058953	-2.01538	1.63848	-	-	FAM183A	No	NA
Peak_31449	chr1	43338453	43338699	-	-	1.1956	2.76458	MPL	Yes	Yes
Peak_23318	chr1	43349203	43349498	-	-	1.5326	2.49499	MPL	Yes	Yes
Peak_2722	chr1	43388801	43390889	1.09844	1.63751	-	-	MED8	No	Yes
Peak_25362	chr1	44048074	44048578	-2.07392	2.22755	-1.62128	1.89682	KLF17	Yes	NA
Peak_978	chr1	44404763	44410487	-1.35162	6.01493	-1.45883	5.7563	RNF220	No	Yes
Peak_28284	chr1	44414994	44415482	1.03217	1.46775	-	-	LOC107984951	No	NA
Peak_25918	chr1	44486052	44486432	-1.49523	1.48261	-	-	MIR5584	No	NA
Peak_13940	chr1	44631406	44632392	-	-	0.895167	1.63899	RNF220	No	Yes
Peak_18522	chr1	44632475	44632942	1.0664	1.84445	1.53957	3.2729	RNF220	No	Yes
Peak_17436	chr1	44723144	44724554	1.02694	3.72463	1.26994	4.82285	ARMH1	No	NA
Peak_25919	chr1	44784589	44784920	-	-	0.790438	1.80182	BEST4	No	No
Peak_24485	chr1	44801857	44802150	-	-	0.715855	1.3975	PLK3	No	No
Peak_18717	chr1	44813568	44814156	-	-	0.945014	1.43103	BTBD19	No	No
Peak_7893	chr1	44819092	44821010	-0.598277	1.37417	-	-	PTCH2	Yes	Yes
Peak_9204	chr1	45303828	45304933	-	-	0.887293	2.30124	LINC01144	No	Yes
Peak_8027	chr1	45326342	45327667	-	-	0.699508	1.71323	HPDL	No	Yes
Peak_14445	chr1	45749989	45750615	1.16705	2.81162	0.872795	1.60524	IPP	No	Yes
Peak_11266	chr1	46166501	46167445	-0.943347	1.95952	-0.786304	1.37456	TSPAN1	No	NA
Peak_6846	chr1	46202936	46204835	-1.05189	3.51752	-	-	LURAP1	No	No
Peak_1609	chr1	46300874	46304909	0.492151	1.30399	-	-	LRRC41	No	NA
Peak_5567	chr1	46615819	46617319	-	-	0.89655	2.44016	MOB3C	No	Yes
Peak_1149	chr1	47227611	47232239	-	-	0.833149	1.53349	TAL1	Yes	Yes
Peak_23195	chr1	47432601	47432932	-1.3651	1.64143	-	-	FOXD2-AS1	No	Yes
Peak_31871	chr1	47592891	47593554	-1.62889	1.86497	-	-	LINC01738	No	NA
Peak_2280	chr1	48775475	48778102	-1.00418	1.91906	-	-	BEND5	No	Yes
Peak_879	chr1	51236502	51238578	1.07881	4.60456	0.855318	1.6384	RNF11	No	NA
Peak_26970	chr1	51516432	51517163	-	-	-1.12876	2.034	EPS15-AS1	No	NA
Peak_3697	chr1	51517362	51519321	-	-	-1.22388	1.95027	EPS15-AS1	No	NA
Peak_27569	chr1	51876582	51876993	0.693277	1.38219	0.723475	1.45758	NRDC	No	NA
Peak_19080	chr1	52702928	52703716	-	-	1.14839	2.16829	COA7	No	Yes
Peak_16393	chr1	52921318	52922098	-	-	1.34997	2.28834	ECHDC2	Yes	No
Peak_7117	chr1	53014314	53015942	-	-	-1.02132	1.9224	SCP2	No	NA
Peak_22633	chr1	53062317	53062827	-1.78194	1.34534	-1.45077	1.4117	PODN	No	NA
Peak_16676	chr1	53328160	53328525	-1.74656	1.70115	-	-	LRP8-DT	No	NA
Peak_30680	chr1	54121439	54121650	-	-	1.93755	2.61161	CDCP2	No	NA
Peak_25396	chr1	54356128	54356595	-	-	0.845417	1.45153	SSBP3	No	NA
Peak_12462	chr1	54886027	54887986	-	-	0.794894	1.98494	DHCR24	Yes	Yes
Peak_8119	chr1	55211880	55216619	-0.906929	5.06302	-	-	USP24	No	No
Peak_24659	chr1	55217717	55218027	-	-	-2.04256	1.82115	MIR4422HG	No	NA
Peak_9076	chr1	59296807	59297563	-	-	1.12066	2.78789	FGGY	No	Yes
Peak_25737	chr1	59697334	59697744	-1.2608	1.40551	-1.29894	1.60572	FGGY	No	Yes
Peak_17257	chr1	61042780	61043630	-0.776707	1.34534	-	-	NFIA	No	No
Peak_9599	chr1	61052803	61054724	-0.626249	1.58606	-	-	NFIA	No	No
Peak_17266	chr1	61079605	61080610	0.765827	1.38746	-	-	NFIA	No	No
Peak_24486	chr1	61101485	61102028	-	-	-0.88638	1.57296	NFIA	No	No
Peak_17393	chr1	61254624	61255667	-1.30497	2.00818	-1.26732	1.737	NFIA-AS1	No	No
Peak_31815	chr1	61255770	61255995	-	-	-1.02974	1.91353	NFIA-AS1	No	No
Peak_2608	chr1	62435354	62436533	-	-	0.828505	2.0993	USP1	Yes	No
Peak_5510	chr1	62436748	62438812	-	-	-1.15667	1.70118	USP1	Yes	No
Peak_31510	chr1	63122398	63122630	-	-	1.99328	3.10335	LINC00466	No	NA
Peak_12717	chr1	65002257	65003669	-0.781171	1.97903	-	-	LINC01359	No	No
Peak_3594	chr1	65064823	65069869	-0.50353	1.46312	-	-	JAK1	Yes	No
Peak_14081	chr1	65148413	65149840	-0.972162	1.52824	-	-	AK4	No	Yes
Peak_13939	chr1	65265339	65266586	-1.02787	1.51153	-	-	DNAJC6	No	Yes
Peak_38851	chr1	65429811	65430027	-	-	1.03257	1.81962	LEPROT	No	NA
Peak_17654	chr1	65792515	65793578	-	-	1.5441	1.63811	PDE4B	Yes	Yes
Peak_22347	chr1	66301305	66301638	-	-	-1.20424	1.41583	PDE4B	Yes	Yes
Peak_22260	chr1	67635230	67635812	-1.29033	1.92282	-0.987715	1.34441	GADD45A	Yes	Yes
Peak_14190	chr1	67766305	67766800	-	-	-1.07966	1.9121	GNG12-AS1	No	NA
Peak_31298	chr1	69569346	69569834	-	-	2.52395	2.72321	LRRC7	No	No
Peak_1804	chr1	70352913	70355394	-	-	-0.631132	1.51271	HHLA3	No	Yes
Peak_31124	chr1	71046549	71046925	-	-	1.23469	1.57895	PTGER3	No	Yes
Peak_398	chr1	74732301	74734632	-1.03066	1.43508	-	-	TYW3	No	No
Peak_12917	chr1	78045257	78046919	-	-	1.19579	2.54436	GIPC2	No	NA
Peak_17028	chr1	80674048	80674725	-	-	-2.81079	2.30794	LINC01781	No	NA
Peak_21368	chr1	82979770	82980074	-1.41713	1.37047	-	-	LINC01361	No	NA
Peak_14953	chr1	83692588	83694249	-	-	-1.28343	1.7724	LINC01725	No	NA
Peak_4330	chr1	84143946	84148365	-	-	-0.823698	1.38624	PRKACB	Yes	Yes
Peak_2936	chr1	84298077	84299647	-	-	-1.07933	1.44537	SAMD13	No	No
Peak_7553	chr1	84301142	84304017	-0.986294	1.83532	-	-	SAMD13	No	No
Peak_14104	chr1	84433327	84434020	-2.07361	1.90322	-	-	DNASE2B	No	NA
Peak_20686	chr1	85091543	85092154	-	-	-1.61549	1.52572	DNAI3	No	NA
Peak_17443	chr1	85577079	85578152	-1.9482	3.40905	-	-	DDAH1	No	NA
Peak_22513	chr1	85990808	85991375	-	-	1.21627	1.33905	COL24A1	Yes	Yes
Peak_8810	chr1	86155235	86157366	-	-	1.31204	3.74564	COL24A1	Yes	Yes
Peak_4544	chr1	89124067	89126451	-	-	-0.885806	3.26614	GBP2	Yes	No
Peak_33416	chr1	89540371	89540760	-0.810717	1.39674	-	-	LOC105378844	No	NA
Peak_7111	chr1	89842916	89844543	-0.694747	1.51897	-	-	LRRC8D	No	No
Peak_29226	chr1	89904169	89904741	-	-	-0.788795	1.48969	LRRC8D	No	No
Peak_41955	chr1	90340110	90340509	-	-	-2.46354	2.39823	LOC105378850	No	NA
Peak_11823	chr1	91884880	91886834	-1.31438	1.49655	-	-	TGFBR3	No	Yes
Peak_21019	chr1	92459612	92460300	-	-	-1.73632	2.65739	GFI1	Yes	Yes
Peak_38548	chr1	92859205	92859604	-	-	-1.04073	1.47604	DIPK1A	No	NA
Peak_1980	chr1	93078403	93082158	-	-	-1.52258	3.464	MTF2	No	No
Peak_2335	chr1	93344916	93349788	-	-	-0.704334	2.35527	CCDC18-AS1	No	NA
Peak_25722	chr1	93414768	93415046	-	-	-2.70872	3.00897	FNBP1L	No	NA
Peak_6268	chr1	94417565	94419937	0.923073	2.54452	-	-	ABCD3	No	NA
Peak_10059	chr1	94925365	94927138	-	-	1.76206	1.59235	CNN3	No	No
Peak_16923	chr1	94927363	94927925	-	-	1.68463	2.54366	CNN3-DT	No	NA
Peak_993	chr1	97919064	97922068	-	-	-1.00829	2.9952	DPYD	Yes	Yes
Peak_2430	chr1	99849498	99851179	0.635671	1.35675	-	-	AGL	Yes	No
Peak_700	chr1	100350988	100354387	-0.534789	1.36039	-	-	CDC14A	Yes	NA
Peak_21399	chr1	100463856	100464143	-1.51949	1.40547	-1.67197	1.9015	CDC14A	Yes	NA
Peak_35754	chr1	100523266	100523525	1.27081	1.73069	1.31538	2.23385	GPR88	No	No
Peak_27346	chr1	101079234	101079524	-1.48099	2.31721	-1.20955	1.87975	LOC102606465	No	NA
Peak_44529	chr1	101128277	101128693	-1.62268	1.64115	-	-	LOC102606465	No	NA
Peak_39917	chr1	101262602	101263058	-	-	-1.90624	2.27608	S1PR1	Yes	No
Peak_19013	chr1	101308978	101310034	-1.42075	1.83665	-	-	LINC01307	No	NA
Peak_918	chr1	107056001	107058426	-0.514234	1.42181	-	-	PRMT6	No	Yes
Peak_24570	chr1	107897316	107897914	-2.94386	3.51752	-1.85912	2.08738	MIR7852	No	NA
Peak_1569	chr1	108876628	108878518	-0.980919	1.66276	-0.726241	1.47525	GPSM2	Yes	No
Peak_3843	chr1	109282439	109284149	-	-	0.556845	1.42686	PSRC1	Yes	Yes
Peak_31811	chr1	109370988	109371202	-2.24031	2.22983	-2.22644	2.76178	SORT1	No	Yes
Peak_15452	chr1	109396962	109397925	-1.28463	1.49928	-	-	SORT1	No	Yes
Peak_1535	chr1	109618905	109622672	-	-	0.431208	1.70678	AMPD2	No	Yes
Peak_26773	chr1	109622754	109622945	-	-	1.04564	2.05654	AMPD2	No	Yes
Peak_4185	chr1	110034124	110035851	-	-	-1.11657	3.52298	STRIP1	No	No
Peak_17422	chr1	110209477	110210013	-	-	0.809129	1.84015	KCNC4-DT	No	NA
Peak_14174	chr1	110672016	110675458	-	-	0.630573	1.81705	KCNA3	No	No
Peak_20688	chr1	111507668	111508382	-1.72406	1.64067	-1.47415	1.57359	TMIGD3	No	NA
Peak_17733	chr1	111515031	111516316	-0.736304	1.45081	-0.782346	1.63916	TMIGD3	No	NA
Peak_5710	chr1	111619810	111621576	-	-	-1.02533	2.42387	RAP1A	Yes	No
Peak_49674	chr1	111622238	111622661	-	-	-1.57208	2.402	RAP1A	Yes	No
Peak_57021	chr1	111844693	111845032	-	-	-1.8605	1.43257	KCND3-IT1	No	NA
Peak_28277	chr1	112337161	112337475	-	-	-1.69911	2.45794	LINC02884	No	NA
Peak_11401	chr1	112706514	112707750	-	-	1.30955	1.84114	RHOC	Yes	Yes
Peak_22602	chr1	112849653	112850393	-1.75954	1.66662	-	-	LINC01356	No	Yes
Peak_20365	chr1	113812540	113813036	-	-	0.99382	2.10596	AP4B1-AS1	No	Yes
Peak_319	chr1	113928229	113932552	-0.568166	1.42463	-0.589603	1.75149	HIPK1-AS1	No	No
Peak_16935	chr1	114346238	114346678	-	-	1.65832	1.32552	TRIM33	Yes	Yes
Peak_3500	chr1	114509211	114512678	0.491503	1.72571	-	-	TRIM33	Yes	Yes
Peak_28393	chr1	115085283	115085523	1.37422	2.45697	1.16323	2.46764	TSPAN2	No	Yes
Peak_6430	chr1	116569575	116571759	-	-	0.600814	1.56529	CD58	Yes	No
Peak_25457	chr1	117359534	117360248	-1.56453	1.95949	-	-	MAN1A2	No	NA
Peak_31515	chr1	117614220	117614392	-	-	1.23854	2.51207	TENT5C	No	NA
Peak_20275	chr1	119712725	119713361	-	-	1.12401	1.49953	PHGDH	No	Yes
Peak_13723	chr1	121518816	121520015	-	-	1.2444	2.75132	EMBP1	No	Yes
Peak_6258	chr1	145844977	145846600	-	-	-0.901608	1.82829	NUDT17	No	Yes
Peak_4469	chr1	145960031	145962526	-0.916649	1.65652	-	-	ANKRD34A	No	NA
Peak_29656	chr1	147079926	147080431	-2.00681	1.73866	-	-	RNVU1-8	No	NA
Peak_8115	chr1	148333718	148335730	-0.735621	1.38093	-0.821435	1.90986	MIR5087	No	NA
Peak_16704	chr1	148361598	148362574	-	-	0.981646	1.36985	RNVU1-1	No	NA
Peak_17011	chr1	148388179	148389323	0.655184	1.81468	-	-	MIR6077	No	NA
Peak_10571	chr1	149899539	149900456	-	-	0.783974	2.03386	BOLA1	No	Yes
Peak_11069	chr1	150009553	150011148	-	-	2.03906	3.11325	OTUD7B	No	Yes
Peak_5557	chr1	150148755	150152274	-	-	-0.597628	1.36417	PLEKHO1	Yes	Yes
Peak_26881	chr1	150159880	150160297	0.932655	2.02611	-	-	LOC105371433	No	NA
Peak_23439	chr1	150162539	150163168	-1.22962	1.67394	-	-	LOC105371433	No	NA
Peak_18467	chr1	150579850	150580485	-	-	0.783408	1.61253	MCL1	Yes	Yes
Peak_6366	chr1	150628110	150630602	0.479472	1.31616	-	-	ENSA	No	Yes
Peak_23010	chr1	150763760	150764238	0.67743	1.32724	-	-	CTSS	No	No
Peak_5569	chr1	150874507	150877496	0.654944	1.51897	-	-	ARNT	No	No
Peak_13324	chr1	150974858	150975602	-	-	0.898228	1.659	CERS2	No	No
Peak_7269	chr1	151005298	151007191	0.809928	2.00305	-	-	MINDY1	No	NA
Peak_7595	chr1	151145590	151147419	-	-	0.728093	1.35637	SEMA6C	No	NA
Peak_19121	chr1	151158310	151158962	-	-	0.881708	1.97788	TNFAIP8L2-SCNM1	No	NA
Peak_232	chr1	151165191	151167324	-	-	1.02524	2.93228	LYSMD1	No	Yes
Peak_8341	chr1	151539642	151541692	-	-	-0.751518	1.37893	TUFT1	No	Yes
Peak_23940	chr1	151838421	151840374	-0.989959	1.86841	-	-	C2CD4D	No	No
Peak_9109	chr1	151992105	151993911	-	-	1.08974	3.27717	S100A10	No	Yes
Peak_15764	chr1	152109989	152111719	-1.34644	2.22289	-	-	TCHH	No	NA
Peak_17775	chr1	152188779	152189580	-1.81638	1.88313	-	-	FLG-AS1	No	No
Peak_10670	chr1	153544522	153546236	-0.61134	1.51566	-	-	S100A4	No	Yes
Peak_20065	chr1	153627325	153627626	-	-	2.06294	2.89725	S100A13	No	Yes
Peak_22162	chr1	153633377	153633842	-	-	0.80545	2.32527	CHTOP	No	No
Peak_6513	chr1	153658337	153659779	0.84764	2.11856	-	-	SNAPIN	No	NA
Peak_16929	chr1	153697917	153698706	-	-	1.78117	4.55573	MIR8083	No	NA
Peak_4793	chr1	153920212	153922526	-0.906404	1.7657	-0.681682	1.42337	GATAD2B	No	Yes
Peak_1683	chr1	153923129	153924306	0.78268	1.80794	-	-	LOC101928059	No	NA
Peak_5570	chr1	153944675	153946734	-0.967554	1.37181	-1.29004	2.56757	DENND4B	Yes	No
Peak_7122	chr1	154220831	154222709	-	-	-0.784446	1.39592	UBAP2L	No	NA
Peak_1330	chr1	154271841	154273579	-	-	-0.844765	1.71905	HAX1	Yes	Yes
Peak_6821	chr1	154325539	154329328	-0.59131	1.44845	-	-	ATP8B2	No	NA
Peak_11051	chr1	154352225	154353375	-1.32669	2.00305	-1.03634	1.50373	ATP8B2	No	NA
Peak_47447	chr1	154403583	154403758	-1.18137	1.35947	-1.25839	1.63163	IL6R	Yes	Yes
Peak_32382	chr1	154501902	154502561	-	-	1.39368	1.84778	TDRD10	No	No
Peak_38835	chr1	154747835	154748322	-1.25609	1.76558	-	-	KCNN3	Yes	NA
Peak_21035	chr1	154760311	154761032	-1.34491	1.69813	-	-	KCNN3	Yes	NA
Peak_2285	chr1	154951786	154956867	-	-	0.409873	1.33456	PBXIP1	Yes	Yes
Peak_20757	chr1	154970781	154971298	-	-	1.37247	3.0272	SHC1	Yes	No
Peak_19153	chr1	154999664	155000609	-1.88284	1.47194	-1.70525	1.5003	ZBTB7B	No	NA
Peak_11626	chr1	155062884	155064531	-1.14774	2.77041	-	-	EFNA3	No	Yes
Peak_11982	chr1	155126647	155127742	-	-	1.43752	2.34334	EFNA1	No	No
Peak_8500	chr1	155127830	155131207	-	-	1.45019	2.0271	EFNA1	No	No
Peak_8014	chr1	155134968	155136567	-	-	1.31196	1.88913	SLC50A1	No	Yes
Peak_2675	chr1	155139627	155140882	-	-	1.19828	1.66474	DPM3	No	Yes
Peak_1698	chr1	155308716	155310263	0.907307	1.41351	0.986647	1.73986	FDPS	No	Yes
Peak_2707	chr1	155687831	155690076	-	-	0.726024	1.74238	YY1AP1	No	Yes
Peak_740	chr1	155933514	155935177	-	-	0.68519	1.64754	KHDC4	No	NA
Peak_3728	chr1	155974090	155979918	-0.542652	1.37491	-	-	ARHGEF2-AS2	No	NA
Peak_2195	chr1	156019902	156021424	0.633093	1.34371	-	-	LOC105371729	No	NA
Peak_19239	chr1	156076402	156077143	-	-	0.687472	1.34682	MEX3A	No	Yes
Peak_3844	chr1	156114111	156116316	-	-	1.21644	1.63219	LMNA	Yes	Yes
Peak_20278	chr1	156116402	156116857	0.747708	1.47156	0.825778	1.92523	LMNA	Yes	Yes
Peak_29047	chr1	156154496	156154975	-	-	0.927426	1.38345	SEMA4A	Yes	Yes
Peak_43870	chr1	156214190	156214424	-	-	0.963747	2.15557	PMF1	No	NA
Peak_14202	chr1	156291203	156291941	-	-	0.880296	1.74855	SMG5	Yes	NA
Peak_16606	chr1	156369069	156369693	-	-	1.11257	1.75514	RHBG	No	NA
Peak_24121	chr1	156502249	156503770	-	-	0.61984	1.44253	MEF2D	Yes	Yes
Peak_20373	chr1	156706274	156706822	-1.92051	1.52247	-	-	CRABP2	No	Yes
Peak_23082	chr1	156741400	156741870	0.795985	1.45911	-	-	MRPL24	No	Yes
Peak_18961	chr1	156746757	156747179	-	-	1.31788	2.36894	HDGF	No	Yes
Peak_20099	chr1	156813367	156814408	-	-	0.592725	1.35285	SH2D2A	Yes	Yes
Peak_26563	chr1	156817090	156817393	1.31136	2.07682	-	-	SH2D2A	Yes	Yes
Peak_33528	chr1	158676036	158676275	-	-	1.56492	1.35569	SPTA1	No	Yes
Peak_27161	chr1	159008529	159008800	0.991044	1.72773	0.926835	1.8559	IFI16	No	Yes
Peak_845	chr1	159921389	159926504	-0.472131	1.50451	-	-	TAGLN2	No	No
Peak_9267	chr1	160097544	160098636	-	-	0.836663	1.87746	IGSF8	Yes	NA
Peak_8296	chr1	160205401	160206301	-	-	1.59236	2.46581	PEA15	No	Yes
Peak_3217	chr1	160284126	160285577	1.01248	1.34953	-	-	DCAF8	No	NA
Peak_27292	chr1	160437840	160438682	-	-	0.752681	1.72862	VANGL2	Yes	No
Peak_35420	chr1	160540507	160540885	-	-	-3.2299	3.26312	LOC105371468	No	NA
Peak_16979	chr1	160711237	160711787	-	-	1.47255	1.80182	CD48	Yes	Yes
Peak_8118	chr1	161037890	161039276	-0.846455	1.72913	-	-	TSTD1	No	Yes
Peak_5539	chr1	161067646	161070279	-0.683056	1.84515	-	-	ARHGAP30	No	Yes
Peak_5383	chr1	161158892	161160517	-	-	0.733977	1.89846	USP21	No	NA
Peak_1543	chr1	161176284	161178025	-	-	0.542689	1.30999	B4GALT3	No	Yes
Peak_1890	chr1	161201661	161203315	0.872199	2.42063	1.01543	4.20071	NDUFS2	Yes	Yes
Peak_14117	chr1	161227557	161228240	-1.23644	1.59488	-	-	TOMM40L	No	No
Peak_2437	chr1	161398850	161400801	0.568632	1.34149	0.902523	2.7344	CFAP126	No	NA
Peak_17637	chr1	161727190	161727795	-1.80317	2.30374	-2.69004	5.20831	FCRLB	No	Yes
Peak_1397	chr1	162497154	162498961	-	-	-1.06482	2.76117	UHMK1	No	No
Peak_26603	chr1	164562221	164563247	-	-	-2.25222	6.40427	PBX1	Yes	No
Peak_19078	chr1	164625118	164625617	-	-	-1.47773	2.3049	PBX1	Yes	No
Peak_24290	chr1	165424258	165424550	-	-	-1.89594	2.26385	RXRG	Yes	NA
Peak_4682	chr1	165827482	165829756	-	-	-1.03231	2.31872	TMCO1	No	No
Peak_14394	chr1	167328648	167329663	-	-	-1.14617	3.04404	POU2F1	No	Yes
Peak_15113	chr1	167439057	167439938	-	-	0.951373	3.0058	CD247	Yes	Yes
Peak_6159	chr1	167630215	167633478	-0.615264	1.48544	-	-	RCSD1	No	NA
Peak_4356	chr1	167713159	167715498	-0.772971	1.89571	-0.681223	1.67763	MPZL1	No	No
Peak_8494	chr1	167720885	167723266	-	-	-1.17123	3.26614	MPZL1	No	No
Peak_28468	chr1	168227127	168227459	-	-	-0.726671	1.53917	SFT2D2	No	No
Peak_36265	chr1	168342926	168343135	-1.91697	1.63843	-1.77359	1.76969	MIR557	No	NA
Peak_19042	chr1	169309217	169309935	-	-	-1.98856	2.2852	NME7	No	No
Peak_9046	chr1	169426966	169427890	-	-	-1.24026	1.34785	CCDC181	Yes	No
Peak_26968	chr1	169706589	169707536	-	-	0.831748	1.4122	SELL	Yes	Yes
Peak_30876	chr1	172381039	172381335	-1.20283	1.38796	-1.21863	1.73986	DNM3	No	No
Peak_30706	chr1	172746168	172746400	-	-	-1.54942	1.35982	FASLG	Yes	No
Peak_7728	chr1	173202102	173206319	-	-	-1.00279	2.2857	TNFSF4	No	Yes
Peak_12151	chr1	173206788	173207766	-1.19178	2.37464	-1.85603	5.70445	TNFSF4	No	Yes
Peak_25271	chr1	173865912	173866124	-	-	-1.28972	1.80047	GAS5	No	No
Peak_2998	chr1	173866204	173869604	-0.718559	1.3937	-1.09407	2.75857	GAS5	No	No
Peak_13108	chr1	174874334	174875016	-	-	1.34747	1.57611	RABGAP1L	No	No
Peak_20066	chr1	174938445	174938955	-1.2243	1.55933	-1.16867	1.60145	RABGAP1L-AS1	No	NA
Peak_25631	chr1	178192726	178193075	-	-	-1.61897	2.49753	RASAL2	Yes	No
Peak_974	chr1	178541687	178543699	-1.00394	1.67552	-	-	C1orf220	No	Yes
Peak_8442	chr1	179025822	179027423	0.750346	1.41961	-	-	FAM20B	No	Yes
Peak_4732	chr1	179293162	179294882	-	-	-0.772897	1.93411	SOAT1	No	NA
Peak_4155	chr1	179876286	179878237	0.781526	1.97807	-	-	TOR1AIP2	No	No
Peak_605	chr1	179953579	179956868	0.471929	1.53717	-	-	CEP350	Yes	NA
Peak_8002	chr1	180154866	180156127	0.576011	1.3238	-	-	QSOX1	No	No
Peak_28929	chr1	181088126	181088554	1.11538	1.85689	0.854015	1.49863	IER5	No	Yes
Peak_31059	chr1	181099615	181099924	-1.07746	1.63942	-1.5702	3.65914	IER5	No	Yes
Peak_20969	chr1	181128849	181129335	-1.11282	1.43039	-1.02023	1.58966	IER5	No	Yes
Peak_25736	chr1	182259512	182259809	-2.53262	3.11162	-2.18272	3.37534	LINC01344	No	Yes
Peak_15416	chr1	182614512	182616172	-1.31722	3.80419	-0.943333	1.75936	LINC01686	No	NA
Peak_7123	chr1	183472461	183473901	-0.995563	1.35136	-	-	SMG7	Yes	No
Peak_3620	chr1	184385945	184389688	-0.551965	1.42522	-	-	C1orf21	No	Yes
Peak_26782	chr1	184456134	184456334	-	-	-1.95632	1.38075	C1orf21	No	Yes
Peak_1851	chr1	185045411	185047523	-	-	-0.928252	2.09972	RNF2	Yes	No
Peak_2743	chr1	185315305	185317369	1.1282	1.74526	-	-	IVNS1ABP	No	NA
Peak_225	chr1	186373371	186377087	-	-	-1.17803	1.96854	ODR4	No	NA
Peak_17642	chr1	186618414	186618978	-	-	-1.50031	2.18461	PTGS2	Yes	Yes
Peak_33597	chr1	186679311	186679491	1.18348	1.88567	-	-	PTGS2	Yes	Yes
Peak_71	chr1	186828563	186831153	-	-	-1.09453	1.51665	PLA2G4A	No	Yes
Peak_6819	chr1	197773028	197776092	-	-	-0.567477	1.52099	DENND1B	No	Yes
Peak_23392	chr1	198174345	198174901	-1.54898	3.06962	-0.93657	1.88009	NEK7	No	No
Peak_27376	chr1	198179677	198180114	-	-	-1.3759	1.96682	NEK7	No	No
Peak_20759	chr1	198929965	198930644	-	-	-1.36426	1.7083	MIR181A1HG	Yes	Yes
Peak_19106	chr1	198932322	198933301	-	-	-1.13763	1.93611	MIR181A1HG	Yes	Yes
Peak_3114	chr1	198933528	198937880	-	-	-1.7257	5.18143	MIR181A1HG	Yes	Yes
Peak_30880	chr1	200242639	200243001	-	-	1.0177	1.57359	LINC00862	No	NA
Peak_26755	chr1	201282992	201283568	-1.51701	1.64549	-	-	PKP1	No	Yes
Peak_22267	chr1	201480280	201480516	-	-	0.998347	2.06859	PHLDA3	No	Yes
Peak_14837	chr1	201480640	201482268	-1.50748	3.07283	-0.900918	1.50414	CSRP1	No	No
Peak_9740	chr1	201739505	201740956	-1.15297	2.23973	-	-	NAV1	No	No
Peak_19175	chr1	201888506	201889346	-	-	0.868073	1.60433	SHISA4	No	Yes
Peak_7448	chr1	202142728	202145715	-0.731476	1.44894	-	-	ARL8A	No	Yes
Peak_11225	chr1	202158735	202161649	-0.972886	4.18277	-0.652928	1.91353	PTPN7	Yes	No
Peak_1379	chr1	202348663	202350098	0.926345	1.61644	-	-	PPP1R12B	Yes	Yes
Peak_29670	chr1	202615777	202616112	-	-	-2.00217	2.0993	SYT2	No	Yes
Peak_5026	chr1	202805046	202809184	-0.521493	1.46384	-0.951966	4.39011	KDM5B	Yes	No
Peak_6844	chr1	202966368	202967291	-	-	1.00513	3.36276	CYB5R1	No	NA
Peak_11438	chr1	202967409	202968971	-1.42843	2.61305	-0.932589	1.51567	CYB5R1	No	NA
Peak_16585	chr1	203075417	203076456	-1.15881	1.41533	-	-	PPFIA4	No	Yes
Peak_5540	chr1	203626120	203630345	-0.895062	1.90627	-	-	ATP2B4	Yes	Yes
Peak_2494	chr1	203795552	203797639	-	-	-0.659861	1.38508	ZC3H11A	No	NA
Peak_2773	chr1	204515886	204517902	0.630124	2.10315	0.476446	1.34375	MDM4	Yes	Yes
Peak_22290	chr1	205440931	205441301	-1.50374	1.80583	-1.37878	2.09596	MIR135B	No	NA
Peak_28283	chr1	205678240	205678627	-	-	1.02452	1.60524	SLC45A3	No	Yes
Peak_3355	chr1	206557139	206559770	-0.65554	1.71066	-0.7367	1.92523	RASSF5	Yes	NA
Peak_25317	chr1	206575364	206575613	-	-	-1.63034	1.67561	RASSF5	Yes	NA
Peak_129	chr1	207049660	207051747	0.531344	1.43911	-	-	YOD1	No	Yes
Peak_21367	chr1	207669169	207670008	-	-	1.09632	1.38557	CR1L	No	Yes
Peak_33880	chr1	207923991	207924213	-	-	-2.77518	2.48276	CD34	Yes	No
Peak_14411	chr1	207958679	207960066	-0.633551	1.62604	-0.633969	1.39615	LINC02767	No	NA
Peak_15626	chr1	207962902	207963667	-	-	1.30573	3.37482	LINC02767	No	NA
Peak_17338	chr1	208086398	208086921	-1.39957	1.65817	-1.21827	1.82798	LOC105372887	No	NA
Peak_12633	chr1	209756053	209757794	-	-	-0.804577	1.42556	TRAF3IP3	No	Yes
Peak_14327	chr1	211579485	211580084	-	-	1.60679	2.21736	SLC30A1	No	No
Peak_217	chr1	212034320	212037243	-	-	-1.03542	1.44456	INTS7	No	NA
Peak_28772	chr1	212186716	212186983	-	-	-0.800123	1.34208	LINC02608	No	NA
Peak_3356	chr1	212413689	212415315	-	-	0.549649	1.34406	PACC1	No	NA
Peak_12480	chr1	212558093	212559496	-	-	0.706415	1.88466	ATF3	Yes	No
Peak_25902	chr1	212951549	212951818	-	-	1.58948	2.10639	VASH2	No	Yes
Peak_9857	chr1	218344850	218347896	-0.886551	1.34183	-	-	TGFB2	No	No
Peak_14191	chr1	218351169	218351799	-	-	-1.50408	2.10038	TGFB2	No	No
Peak_2883	chr1	220089131	220090660	0.709006	1.63062	-	-	BPNT1	Yes	Yes
Peak_20253	chr1	220887648	220888135	-1.35688	1.89563	-	-	HLX	Yes	NA
Peak_13074	chr1	220893745	220894563	-1.38192	1.87637	-	-	HLX	Yes	NA
Peak_25343	chr1	221712988	221713520	-	-	-1.28401	2.55026	DUSP10	Yes	Yes
Peak_9447	chr1	222618044	222619360	1.07305	1.86531	1.10881	2.54366	MIA3	Yes	NA
Peak_5968	chr1	223843976	223845958	0.612529	1.92725	-	-	TP53BP2	Yes	NA
Peak_8955	chr1	223846058	223847141	1.18984	3.13033	1.22825	3.5378	TP53BP2	Yes	NA
Peak_13728	chr1	223992924	223993898	-	-	0.838588	1.33812	SEPTIN7P13	No	NA
Peak_7750	chr1	224182328	224184583	0.565095	2.2421	-	-	DEGS1	No	No
Peak_7305	chr1	224434649	224435813	-1.71699	1.42334	-1.79377	1.97788	CNIH3	No	No
Peak_3736	chr1	225425207	225429064	-	-	-0.829096	2.00664	LBR	No	No
Peak_21768	chr1	225810817	225811247	-	-	1.88129	3.39764	EPHX1	Yes	No
Peak_19481	chr1	225999740	226000462	-1.41253	1.95923	-0.940848	1.3562	SDE2	No	Yes
Peak_31292	chr1	226350256	226350808	-0.860499	1.41914	-	-	PARP1	Yes	Yes
Peak_9405	chr1	226702829	226704085	0.75033	1.71066	0.922769	3.05885	ITPKB-IT1	No	Yes
Peak_14683	chr1	227541820	227542760	-0.961445	1.54178	-	-	ZNF678	No	No
Peak_12182	chr1	227887218	227888157	-1.62362	3.0939	-	-	MIR5008	No	NA
Peak_35000	chr1	228085059	228085546	-	-	0.662237	1.44634	ARF1	Yes	Yes
Peak_4871	chr1	228140126	228142137	-	-	0.83247	2.87299	GUK1	No	Yes
Peak_20383	chr1	228213940	228214456	-	-	0.953283	2.35566	OBSCN-AS1	No	NA
Peak_21771	chr1	228276259	228276666	-	-	1.12996	1.95599	OBSCN	Yes	NA
Peak_25414	chr1	229280627	229280836	-	-	-1.48339	2.98172	RAB4A	No	No
Peak_6300	chr1	230066086	230066891	-	-	-0.979402	1.81962	GALNT2	No	No
Peak_31448	chr1	231036323	231036497	-1.37109	1.68292	-1.7719	3.37398	FAM89A	No	Yes
Peak_13113	chr1	231040363	231041232	-1.66489	1.57281	-	-	FAM89A	No	Yes
Peak_34155	chr1	232725834	232726372	-1.12477	1.32067	-1.47742	2.57236	LINC01745	No	NA
Peak_2885	chr1	232950021	232951743	-	-	-0.837346	1.93726	NTPCR	No	Yes
Peak_8932	chr1	233294923	233296298	-1.31951	1.34626	-	-	PCNX2	Yes	NA
Peak_22248	chr1	234962559	234963022	-1.11502	1.31349	-2.12586	3.83791	LOC101927851	No	NA
Peak_15772	chr1	236064091	236065627	-	-	1.74155	2.61124	NID1	Yes	Yes
Peak_26668	chr1	236415936	236416313	-	-	-1.02179	1.74491	EDARADD	Yes	Yes
Peak_3086	chr1	239385668	239389103	-	-	-0.732753	1.53953	CHRM3	No	NA
Peak_19587	chr1	239457710	239458545	-1.65988	1.31721	-	-	CHRM3	No	NA
Peak_33298	chr1	240493177	240493448	-1.98224	1.37417	-	-	FMN2	Yes	Yes
Peak_230	chr1	241638747	241640407	-	-	-1.07679	2.12073	CHML	No	Yes
Peak_9121	chr1	244460898	244461928	-	-	0.617851	1.36124	CATSPERE	No	NA
Peak_5419	chr1	244652955	244655226	-	-	-0.817263	2.10897	DESI2	No	Yes
Peak_11097	chr1	244729389	244730874	-0.768269	1.30237	-	-	DESI2	No	Yes
Peak_14949	chr1	244815553	244816391	0.651824	1.68654	-	-	COX20	No	Yes
Peak_9598	chr1	244969375	244970595	1.32644	1.69915	-	-	EFCAB2	No	No
Peak_17433	chr1	245156703	245157364	-1.31394	1.34149	-	-	KIF26B	No	No
Peak_20154	chr1	245166351	245166955	-	-	1.46736	2.84039	KIF26B	No	No
Peak_18097	chr1	246573463	246573812	-1.30792	2.22755	-1.11493	1.93414	CNST	No	NA
Peak_34491	chr1	246577210	246577552	-1.36336	1.67189	-1.53216	2.77837	CNST	No	NA
Peak_5159	chr1	246723591	246725730	0.652964	1.98426	-	-	SCCPDH	No	No
Peak_21049	chr1	247110799	247112327	-0.922252	1.77286	-	-	LINC02897	No	NA
Peak_20387	chr1	247127690	247128146	-	-	-1.48594	1.98879	LINC02897	No	NA
Peak_25911	chr1	247360072	247360495	-	-	1.15772	1.71972	ZNF496	No	No
Peak_35424	chr1	247540310	247541052	-	-	1.41043	2.50069	OR2C3	Yes	NA
Peak_13927	chr1	247548420	247550316	1.2316	1.76877	1.44288	3.43341	GCSAML	Yes	Yes
Peak_37778	chr1	247551076	247551376	-	-	1.79792	2.73016	GCSAML	Yes	Yes
Peak_45138	chr1	247642042	247642300	-	-	1.51747	1.52002	LOC102724446	No	NA
Peak_21050	chr1	247906445	247906871	-1.65928	2.13391	-1.22724	1.96371	OR2W3	Yes	NA
Peak_9106	chr1	248906757	248907432	-	-	1.0454	1.66262	PGBD2	Yes	Yes
Peak_15400	chr2	263592	264587	-	-	0.916691	1.51155	SH3YL1	No	Yes
Peak_17543	chr2	467685	469039	-	-	1.84249	2.55967	LINC01874	No	NA
Peak_19687	chr2	3536038	3536952	-	-	1.16827	2.40227	RNASEH1	No	Yes
Peak_16565	chr2	5725794	5726561	-	-	-1.72565	1.32526	LOC112268411	No	NA
Peak_21467	chr2	6933975	6934356	-1.40044	1.4478	-1.44432	1.63916	RNF144A	No	Yes
Peak_36210	chr2	7007617	7008191	-0.942067	1.30564	-	-	RNF144A	No	Yes
Peak_18566	chr2	7430704	7431607	-	-	0.782159	1.8359	LOC100506274	No	NA
Peak_26642	chr2	7899418	7900039	-	-	-1.39351	1.56083	LOC101929551	No	NA
Peak_12769	chr2	9205835	9206653	-1.1693	2.29353	-0.855248	1.61253	ASAP2	No	No
Peak_19367	chr2	10042768	10043125	-	-	1.96058	1.35415	KLF11	No	No
Peak_26184	chr2	10057274	10057733	-0.81159	1.30864	-	-	KLF11	No	No
Peak_7632	chr2	10302827	10305209	-	-	0.710221	1.63346	HPCAL1	No	Yes
Peak_25819	chr2	10382180	10383214	-0.820123	2.45751	-0.690095	1.73699	HPCAL1	No	Yes
Peak_17165	chr2	11129640	11130656	-1.07388	1.78488	-0.766559	1.30672	FLJ33534	No	NA
Peak_25331	chr2	11326568	11326923	-1.45628	1.91396	-1.32694	1.93726	ROCK2	No	No
Peak_17638	chr2	11719242	11719884	-	-	-1.3575	1.37266	LOC101929752	No	NA
Peak_4189	chr2	11746620	11749486	-0.507444	1.37106	-	-	LPIN1	Yes	No
Peak_36091	chr2	11830557	11830908	-	-	-1.24348	1.39823	LOC105373430	No	NA
Peak_4465	chr2	15591123	15592858	-	-	0.955436	1.66474	DDX1	Yes	Yes
Peak_9051	chr2	18559196	18561134	-	-	-0.944459	1.9306	RDH14	No	No
Peak_30693	chr2	20348527	20348755	-	-	0.873711	2.06337	PUM2	Yes	Yes
Peak_13172	chr2	20446260	20448410	-	-	1.86407	5.7235	RHOB	Yes	Yes
Peak_7549	chr2	20650313	20652016	-	-	0.675946	2.36713	HS1BP3	No	No
Peak_16469	chr2	24009655	24011090	-	-	0.906234	1.833	MFSD2B	Yes	No
Peak_16684	chr2	24048955	24050562	-	-	0.890734	2.61861	FKBP1B	No	NA
Peak_1540	chr2	24075177	24076740	-	-	-0.927993	1.56555	FAM228B	No	Yes
Peak_6043	chr2	24083337	24085678	-	-	0.529878	1.58338	TP53I3	No	No
Peak_3764	chr2	24358670	24361261	-0.469081	1.34942	-	-	ITSN2	No	Yes
Peak_19592	chr2	24886391	24887141	-	-	0.810653	1.94592	ADCY3	Yes	NA
Peak_23056	chr2	25132107	25132421	-1.54622	1.52181	-	-	EFR3B	No	Yes
Peak_20539	chr2	25250736	25251134	-1.06398	1.99395	-	-	DNMT3A	Yes	Yes
Peak_13382	chr2	25251214	25252272	-1.6403	2.42917	-0.989412	1.45647	DNMT3A	Yes	Yes
Peak_24869	chr2	25252427	25252955	-	-	0.810225	1.51533	DNMT3A	Yes	Yes
Peak_23765	chr2	25592134	25592506	-	-	-1.041	1.70963	DTNB	Yes	Yes
Peak_22369	chr2	25821983	25822958	0.714596	1.52247	-	-	ASXL2	Yes	No
Peak_33863	chr2	26741360	26741687	-1.76833	1.31584	-	-	SLC35F6	No	NA
Peak_16626	chr2	26971039	26971569	-1.6194	2.637	-	-	MAPRE3	No	Yes
Peak_20061	chr2	27078439	27079018	-	-	1.07579	1.30242	EMILIN1	Yes	No
Peak_26833	chr2	27081431	27081866	-	-	-1.80788	1.90955	EMILIN1	Yes	No
Peak_11494	chr2	27086783	27087470	-	-	1.06254	1.50409	KHK	Yes	Yes
Peak_18846	chr2	27264047	27265269	-1.42219	1.33892	-	-	SLC30A3	No	Yes
Peak_25056	chr2	27946532	27946974	-	-	-1.39775	2.68175	MIR4263	No	NA
Peak_14929	chr2	29114712	29115673	-	-	0.778488	1.76571	CLIP4	No	Yes
Peak_23766	chr2	37013395	37013582	-	-	1.35548	1.9273	HEATR5B	No	Yes
Peak_350	chr2	37082914	37085373	0.592398	1.79096	-	-	GPATCH11	No	No
Peak_28807	chr2	37582804	37583081	-1.21575	1.53705	-1.41829	2.53659	LOC105374464	No	NA
Peak_38725	chr2	37892211	37892724	-1.17211	1.84571	-	-	LINC00211	No	No
Peak_6931	chr2	38600816	38603804	0.592614	1.31201	-	-	HNRNPLL	No	Yes
Peak_2857	chr2	39435134	39438488	-	-	0.487989	1.30999	MAP4K3-DT	No	NA
Peak_26210	chr2	42048176	42048835	-	-	1.35099	1.46065	PKDCC	No	Yes
Peak_1863	chr2	42359305	42361540	-	-	-1.90696	3.97245	COX7A2L	No	No
Peak_11305	chr2	42568717	42569595	-	-	0.883238	1.48362	MTA3	No	Yes
Peak_31182	chr2	42827814	42828156	-	-	1.02303	1.62452	HAAO	No	Yes
Peak_19914	chr2	42975265	42975710	-	-	1.10012	1.95815	LINC01819	No	NA
Peak_936	chr2	43218820	43228658	-0.542576	1.49904	-0.750192	2.07478	LINC01126	No	No
Peak_23767	chr2	43831586	43831884	-1.57355	1.36211	-	-	ABCG8	Yes	NA
Peak_23978	chr2	44778931	44779240	-2.00287	1.78787	-	-	CAMKMT	No	No
Peak_35529	chr2	45263406	45263627	-1.5278	1.51348	-	-	LINC01121	No	No
Peak_14637	chr2	45567242	45568631	-	-	-1.13658	3.18829	SRBD1	No	No
Peak_60032	chr2	46015809	46016196	-0.816796	1.43866	-1.16592	2.76559	PRKCE	Yes	Yes
Peak_27118	chr2	46350310	46350684	-0.971437	1.3508	-1.14166	1.96711	EPAS1	Yes	Yes
Peak_42026	chr2	46569309	46569595	-	-	-2.28505	2.77725	RHOQ	No	No
Peak_4605	chr2	46615403	46618385	-	-	-0.905661	2.36833	PIGF	No	NA
Peak_2982	chr2	46914436	46917105	0.510875	1.31305	-	-	TTC7A	No	Yes
Peak_4015	chr2	46941199	46943371	-	-	-0.552292	1.46706	TTC7A	No	Yes
Peak_13850	chr2	47783923	47784951	-	-	0.580745	1.31627	MSH6	Yes	Yes
Peak_26982	chr2	48343953	48344701	0.879608	1.31056	-	-	FOXN2	Yes	No
Peak_3902	chr2	53766996	53768682	-	-	-1.32177	1.92685	GPR75-ASB3	No	No
Peak_25701	chr2	54422052	54422254	-	-	-1.52206	2.02304	SPTBN1	Yes	No
Peak_561	chr2	54557265	54561625	-	-	-1.00158	2.1918	SPTBN1	Yes	No
Peak_25151	chr2	54673212	54673964	-	-	0.760357	2.06251	SPTBN1	Yes	No
Peak_12972	chr2	54708586	54709838	-0.921862	1.78787	-	-	EML6	Yes	No
Peak_49869	chr2	55046824	55047138	0.863033	1.65295	-	-	RTN4	No	Yes
Peak_2198	chr2	55047365	55051791	-	-	-0.569757	2.39651	RTN4	No	Yes
Peak_20858	chr2	55051964	55052884	-1.05955	1.96743	-1.20567	3.05273	RTN4	No	Yes
Peak_44030	chr2	55111439	55111635	0.810977	1.48453	-	-	RTN4	No	Yes
Peak_13948	chr2	55133397	55134053	-0.974853	1.60533	-	-	RTN4	No	Yes
Peak_10200	chr2	58045670	58047948	0.437363	1.41351	-	-	LOC107984043	No	NA
Peak_6111	chr2	58427063	58428605	-	-	-1.40671	1.46723	LINC01122	No	No
Peak_44582	chr2	60383578	60384085	1.60899	1.85393	1.53713	1.80632	MIR4432HG	No	NA
Peak_28460	chr2	60530784	60531374	-	-	1.12718	1.97558	BCL11A	No	Yes
Peak_37774	chr2	60531770	60531947	-	-	1.33071	3.64939	BCL11A	No	Yes
Peak_847	chr2	60553899	60556263	-	-	-1.96376	2.39116	BCL11A	No	Yes
Peak_33745	chr2	60796780	60796941	-	-	-1.57109	2.16666	PAPOLG	Yes	Yes
Peak_4510	chr2	61469253	61470790	0.597322	1.36432	-	-	USP34	Yes	Yes
Peak_33358	chr2	61534928	61535404	-	-	-1.02401	1.4658	XPO1	Yes	No
Peak_3395	chr2	61694022	61695565	-0.763137	1.95485	-	-	FAM161A	No	Yes
Peak_26211	chr2	63047455	63048078	-1.08422	1.34149	-	-	EHBP1-AS1	No	NA
Peak_2135	chr2	63840081	63843722	0.847296	2.38609	-	-	UGP2	Yes	No
Peak_24469	chr2	64204193	64204514	-	-	0.829208	1.35532	LINC00309	No	NA
Peak_27191	chr2	64260627	64261171	-	-	-0.955744	1.35239	LOC100507006	No	NA
Peak_12698	chr2	64454099	64455139	-	-	1.26399	3.31859	LGALSL	No	No
Peak_8628	chr2	64609473	64610201	-0.952458	1.63386	-0.892555	1.78911	LINC02579	No	NA
Peak_25248	chr2	64636619	64637385	-0.928273	3.56149	-0.888621	2.17808	LOC105374775	No	NA
Peak_5745	chr2	64652112	64653896	-	-	-1.5222	1.38995	SERTAD2	No	Yes
Peak_6533	chr2	64766733	64769014	-1.36241	2.04883	-1.35608	3.15166	SERTAD2	No	Yes
Peak_21627	chr2	64859866	64860354	-1.7762	3.0618	-	-	LINC01800	No	NA
Peak_7865	chr2	65055276	65057782	-	-	-0.821079	1.74874	LOC107984063	No	NA
Peak_23129	chr2	65301167	65301624	-0.952046	1.83512	-1.13184	2.24812	SPRED2	No	Yes
Peak_6045	chr2	65435440	65437169	-	-	-1.10948	1.47525	LOC105369168	No	NA
Peak_1589	chr2	66431897	66442249	-0.801134	1.76714	-	-	MEIS1-AS2	No	No
Peak_13093	chr2	66442417	66447431	-0.742	1.97778	-	-	MEIS1	Yes	No
Peak_3550	chr2	66574987	66579849	-1.26838	1.82711	-0.931598	1.37571	LINC01798	No	NA
Peak_9494	chr2	66580447	66584435	-1.37665	2.77159	-0.854702	1.40157	LINC01798	No	NA
Peak_4088	chr2	68249681	68252585	-	-	-1.21694	2.80302	PPP3R1	Yes	NA
Peak_1758	chr2	68252685	68253887	-	-	-2.21152	1.61489	PPP3R1	Yes	NA
Peak_26212	chr2	68318411	68318678	-	-	1.67806	2.49716	CNRIP1	No	No
Peak_12402	chr2	68318834	68320615	-	-	1.09707	2.96533	CNRIP1	No	No
Peak_20144	chr2	68362222	68362692	-1.57455	2.30628	-2.01152	4.08318	PLEK	No	Yes
Peak_2156	chr2	68465996	68467424	-	-	-1.4653	1.35383	FBXO48	No	No
Peak_5990	chr2	68734341	68738612	-	-	-1.08718	3.72068	ARHGAP25	No	Yes
Peak_29209	chr2	69582214	69582466	-1.8179	2.30628	-1.85797	2.44095	AAK1	No	Yes
Peak_25294	chr2	69582660	69583094	-	-	-1.60747	1.59018	AAK1	No	Yes
Peak_11869	chr2	69913927	69914735	1.55302	2.34525	1.19529	1.42	MXD1	No	Yes
Peak_14587	chr2	70084993	70086982	-	-	0.808944	2.373	ASPRV1	No	No
Peak_10628	chr2	70257780	70258978	-	-	1.1683	2.25013	PCYOX1	No	NA
Peak_22836	chr2	72144619	72145427	-1.99728	1.64292	-	-	CYP26B1	No	NA
Peak_21191	chr2	72295373	72295932	-	-	-2.00769	1.92826	EXOC6B	Yes	No
Peak_13695	chr2	73284429	73285351	-1.73424	1.98788	-1.53332	2.3253	FBXO41	No	Yes
Peak_17047	chr2	74031880	74032551	-1.17014	1.59508	-1.36984	2.92561	TET3	No	Yes
Peak_18564	chr2	74032691	74033181	-1.31922	3.4982	-1.24221	4.13657	TET3	No	Yes
Peak_14349	chr2	74414774	74416158	-0.924671	2.77041	-	-	C2orf81	No	No
Peak_21925	chr2	74440647	74440970	-	-	1.32649	1.828	RTKN	No	No
Peak_15285	chr2	74502412	74503647	-	-	1.07805	1.47136	LBX2-AS1	No	NA
Peak_583	chr2	74506851	74508426	-	-	0.883796	3.38547	PCGF1	No	Yes
Peak_10718	chr2	74548425	74550326	-	-	0.547868	1.34682	DOK1	No	Yes
Peak_30601	chr2	74833466	74833840	0.884261	1.32625	-	-	HK2	Yes	Yes
Peak_9397	chr2	74834060	74836840	-0.748201	1.32926	-1.05722	2.31872	HK2	Yes	Yes
Peak_14123	chr2	74958141	74958949	-	-	0.843816	1.39136	POLE4	Yes	Yes
Peak_16231	chr2	74959006	74959458	0.863847	1.97807	-	-	POLE4	Yes	Yes
Peak_18186	chr2	84880098	84881081	-1.78288	1.63848	-	-	TRABD2A	No	No
Peak_5249	chr2	84904650	84907790	-	-	-0.605026	1.41945	LOC105374836	No	NA
Peak_30081	chr2	85134509	85135003	-1.43028	2.06091	-1.01774	1.47604	TCF7L1	No	Yes
Peak_1608	chr2	85324921	85329147	0.823489	4.86245	-	-	TGOLN2	Yes	Yes
Peak_2241	chr2	85353576	85355862	0.663391	2.0279	-	-	RETSAT	No	No
Peak_25367	chr2	85408410	85409130	-	-	-1.12804	1.63453	CAPG	No	NA
Peak_9884	chr2	85576972	85579926	-1.0849	4.03631	-0.866464	2.83421	VAMP8	No	Yes
Peak_13707	chr2	85583979	85585772	-	-	1.3081	4.73314	VAMP5	No	Yes
Peak_6086	chr2	85887662	85890095	-	-	0.66829	1.50414	ST3GAL5-AS1	No	NA
Peak_18970	chr2	95345329	95346254	-2.21943	1.42868	-	-	KCNIP3	Yes	NA
Peak_19380	chr2	96116548	96117482	-1.67847	1.32142	-	-	ADRA2B	No	NA
Peak_18850	chr2	96145620	96146276	-1.72415	4.65171	-1.22869	2.69078	DUSP2	Yes	Yes
Peak_3397	chr2	96207074	96209746	0.646374	2.00305	-	-	STARD7-AS1	No	Yes
Peak_16566	chr2	96485847	96486919	-	-	0.882621	1.70485	NEURL3	No	NA
Peak_30427	chr2	96554310	96554900	-0.96818	1.36029	-	-	ARID5A	No	Yes
Peak_6122	chr2	96760873	96764800	-0.726504	2.87009	-	-	CNNM4	No	Yes
Peak_10280	chr2	96816209	96818243	-	-	0.838295	1.96968	CNNM3	No	No
Peak_2453	chr2	97644952	97647221	-	-	0.48828	1.50873	COX5B	No	Yes
Peak_28415	chr2	98082114	98082324	-	-	-1.8028	1.38118	VWA3B	Yes	NA
Peak_8005	chr2	98729661	98730992	1.11299	2.84309	-	-	MGAT4A	No	Yes
Peak_14189	chr2	101473705	101475267	-1.01636	2.70458	-1.24213	3.63959	RFX8	No	Yes
Peak_16575	chr2	102142213	102143229	0.917853	1.41017	1.26317	3.33303	IL1R1	Yes	NA
Peak_15277	chr2	102250955	102251767	-1.65494	2.96946	-	-	IL1RL1	No	No
Peak_4710	chr2	102735847	102737750	0.780331	2.30735	-	-	TMEM182	No	Yes
Peak_5702	chr2	105327637	105329526	-1.28589	2.64065	-	-	TGFBRAP1	Yes	Yes
Peak_7396	chr2	105397959	105399303	-	-	0.702277	1.31409	FHL2	No	Yes
Peak_28313	chr2	105797111	105797560	-1.40307	2.54452	-1.17142	1.78433	NCK2	No	No
Peak_17928	chr2	106065061	106066343	-1.14909	2.33301	-	-	ECRG4	No	NA
Peak_3703	chr2	108534394	108535784	0.80176	1.81197	-	-	LIMS1	No	Yes
Peak_12502	chr2	109031240	109032594	-1.48854	4.40707	-	-	EDAR	No	No
Peak_36204	chr2	109335691	109335911	-2.78212	4.86118	-1.96479	3.76709	MIR4266	No	NA
Peak_18648	chr2	111118306	111119796	-1.53081	5.28785	-0.708873	1.51151	BCL2L11	Yes	No
Peak_26911	chr2	111698902	111699378	-1.94155	2.21994	-2.12222	3.55075	MIR4435-2HG	Yes	Yes
Peak_38229	chr2	112001426	112001874	-	-	-1.93663	2.71999	MERTK	Yes	No
Peak_18983	chr2	112137854	112138501	-	-	1.04434	1.53349	FBLN7	No	Yes
Peak_7633	chr2	112274813	112275429	-	-	1.09307	1.43108	ZC3H6	No	No
Peak_3527	chr2	112480633	112483415	0.757086	1.57087	-	-	TTL	Yes	No
Peak_6674	chr2	112583567	112585666	0.506078	1.43538	-	-	CHCHD5	No	No
Peak_26187	chr2	112674433	112674704	-	-	-1.14814	1.5295	SLC20A1	No	Yes
Peak_4697	chr2	112763723	112765732	0.815317	2.86627	0.746432	1.85723	CKAP2L	Yes	Yes
Peak_32118	chr2	112832244	112832568	-1.22535	1.3896	-1.24045	1.87844	IL1B	Yes	Yes
Peak_19368	chr2	113156877	113157287	1.12658	1.58763	1.07891	1.659	PSD4	No	Yes
Peak_17535	chr2	113390013	113390516	-2.3189	1.43377	-2.67972	2.41353	LOC101927400	No	NA
Peak_9801	chr2	113583369	113584169	-1.67133	1.40205	-1.35264	1.3456	MIR1302-3	No	NA
Peak_5552	chr2	117813917	117815647	-	-	-1.44771	1.59018	DDX18	No	Yes
Peak_38719	chr2	117815735	117815987	-	-	-1.06048	1.57637	DDX18	No	Yes
Peak_28151	chr2	118223764	118224744	-1.47203	1.69103	-	-	THORLNC	No	NA
Peak_13170	chr2	119544031	119544915	-1.32535	1.53827	-	-	CFAP221	Yes	Yes
Peak_14652	chr2	120176715	120177941	-1.25541	2.61863	-0.790652	1.58142	EPB41L5	No	Yes
Peak_4806	chr2	120251916	120254398	-	-	0.717833	2.22864	RALB	No	No
Peak_356	chr2	121735351	121736932	-	-	-1.00115	2.06862	NIFK	No	Yes
Peak_15561	chr2	121737171	121737603	-	-	1.14789	2.10952	TSN	No	Yes
Peak_30643	chr2	122660901	122661697	-	-	-1.90286	3.0061	LOC105373593	No	NA
Peak_20215	chr2	126776451	126776693	-1.56463	1.51897	-	-	GYPC	No	No
Peak_30511	chr2	127093773	127093943	-1.19079	1.8731	-	-	BIN1	Yes	No
Peak_19906	chr2	127218807	127219640	-2.04581	1.82547	-	-	CYP27C1	Yes	NA
Peak_21916	chr2	127408251	127408688	-	-	1.27549	1.41191	PROC	Yes	No
Peak_7733	chr2	127700697	127702790	0.500969	1.38093	0.688022	2.2109	SFT2D3	No	NA
Peak_14738	chr2	127884474	127885356	1.12291	3.37906	0.808759	1.94229	AMMECR1L	No	NA
Peak_26190	chr2	128279866	128280594	-1.20725	2.64919	-1.0484	2.3971	HS6ST1	No	Yes
Peak_23751	chr2	128901557	128902610	-	-	1.40718	1.38927	LINC01854	No	NA
Peak_21547	chr2	129161111	129161408	-2.21764	1.54896	-	-	LINC01854	No	NA
Peak_16376	chr2	129877837	129878302	-	-	1.22136	2.69004	LOC105373616	No	NA
Peak_12965	chr2	130797470	130798620	-1.40743	1.34942	-	-	ARHGEF4	No	NA
Peak_30043	chr2	132267901	132268217	-2.07276	1.817	-	-	ANKRD30BL	Yes	NA
Peak_38568	chr2	133560569	133560829	-	-	-2.83879	3.11145	NCKAP5	No	No
Peak_3691	chr2	135051748	135053749	0.590669	1.74112	-	-	RAB3GAP1	No	No
Peak_30551	chr2	135743893	135744309	-1.40538	2.15696	-1.0745	1.81962	UBXN4	No	No
Peak_4196	chr2	135984114	135986293	-0.798133	1.55169	-0.870642	2.16989	DARS1-AS1	No	NA
Peak_2071	chr2	138501859	138504822	-0.861456	1.82696	-	-	SPOPL	No	Yes
Peak_25406	chr2	143110714	143110994	-	-	-2.53116	1.5469	ARHGAP15	Yes	Yes
Peak_25340	chr2	143133069	143133426	0.947468	1.55222	0.812447	1.38899	ARHGAP15	Yes	Yes
Peak_22251	chr2	143139765	143140646	-	-	1.15762	1.51155	ARHGAP15	Yes	Yes
Peak_31175	chr2	143148658	143149116	-	-	0.85119	1.8009	ARHGAP15	Yes	Yes
Peak_22546	chr2	144379662	144380314	-	-	0.94763	2.13028	ZEB2	Yes	Yes
Peak_40194	chr2	144513343	144513592	-	-	1.22451	1.31455	ZEB2	Yes	Yes
Peak_2244	chr2	144517022	144520447	-1.90968	2.44556	-2.35128	4.4022	ZEB2-AS1	No	No
Peak_11740	chr2	149329405	149331469	-1.20915	1.88132	-	-	LYPD6	No	NA
Peak_12656	chr2	151287439	151289078	0.467115	1.79737	-	-	NMI	No	Yes
Peak_7881	chr2	151289206	151290581	-	-	-1.34974	1.42686	NMI	No	Yes
Peak_22193	chr2	151637228	151637831	-	-	-1.81043	3.36891	NEB	Yes	No
Peak_2646	chr2	151826717	151829077	0.623259	2.13881	-	-	ARL5A	No	Yes
Peak_28735	chr2	152166885	152167626	-1.04266	1.77784	-1.14746	2.66937	STAM2	Yes	Yes
Peak_8064	chr2	156435195	156437600	-0.860919	1.82303	-	-	GPD2	No	NA
Peak_23513	chr2	157837693	157838462	-	-	1.2068	2.47569	ACVR1	Yes	No
Peak_6529	chr2	158457098	158459116	1.21544	2.5697	1.13693	1.96978	PKP4	Yes	No
Peak_34287	chr2	159146968	159147699	-1.03699	1.73422	-	-	TANC1	No	No
Peak_7816	chr2	159514853	159517076	-	-	-1.73344	3.03527	BAZ2B	Yes	Yes
Peak_27334	chr2	159753949	159754490	-	-	-1.00752	2.43309	MARCHF7	No	NA
Peak_4592	chr2	159903077	159905419	-0.581588	1.83238	-0.684992	2.10158	LY75-CD302	Yes	No
Peak_29375	chr2	160427996	160428285	-1.64827	2.10315	-2.13845	3.19927	RBMS1	No	Yes
Peak_9323	chr2	160492008	160494020	1.28914	2.76314	0.804177	1.34726	RBMS1	No	Yes
Peak_15717	chr2	161136884	161137360	-1.29967	2.02012	-1.13363	2.132	TANK	No	No
Peak_20050	chr2	161414238	161415064	-1.6837	1.98932	-	-	TBR1	No	NA
Peak_16146	chr2	161500920	161501531	-	-	-1.49884	1.44154	AHCTF1P1	No	NA
Peak_115	chr2	162315708	162319639	-	-	-0.528186	1.87825	GCA	No	Yes
Peak_29110	chr2	164797561	164798073	-	-	-1.17242	1.57294	COBLL1	Yes	No
Peak_10679	chr2	165793119	165795119	-0.984385	2.26334	-	-	GALNT3	No	Yes
Peak_25614	chr2	167196291	167197301	-	-	-1.32305	1.71061	XIRP2	Yes	NA
Peak_12764	chr2	167292209	167293923	-2.22654	2.61305	-	-	B3GALT1	Yes	Yes
Peak_15437	chr2	168490111	168491480	-	-	-1.40571	2.93228	CERS6	No	Yes
Peak_28737	chr2	169715595	169715816	-	-	1.05229	1.42686	KLHL23	No	No
Peak_14070	chr2	170928356	170929012	1.04108	3.95051	0.903054	2.66937	GORASP2	No	Yes
Peak_8383	chr2	170973608	170974402	-	-	0.804006	1.90561	GORASP2	No	Yes
Peak_4426	chr2	171521684	171524781	-0.530688	1.76829	-0.760123	3.74959	CYBRD1	No	No
Peak_3528	chr2	171893210	171894953	0.477899	1.42568	-	-	SLC25A12	No	No
Peak_22315	chr2	172103055	172103431	-2.05775	1.34237	-	-	DLX2-DT	No	NA
Peak_14741	chr2	174326304	174327171	-1.72307	1.71363	-	-	LINC01305	No	Yes
Peak_17037	chr2	174593186	174594326	-	-	-1.35855	3.03214	WIPF1	No	Yes
Peak_5637	chr2	174595255	174598459	-	-	-0.739607	2.41619	WIPF1	No	Yes
Peak_11916	chr2	174632738	174635206	-0.648585	2.07319	-0.571071	1.97409	WIPF1	No	Yes
Peak_15836	chr2	176140379	176140995	-1.87299	1.93697	-1.3043	1.45935	HOXD-AS2	No	NA
Peak_10562	chr2	177147957	177149126	-1.21105	1.52181	-1.15698	1.63572	LOC107985965	No	NA
Peak_39999	chr2	177352628	177353314	-0.987769	1.40623	-1.84517	4.45843	LOC100130691	No	NA
Peak_1307	chr2	181456380	181461986	-0.907586	1.44705	-1.08464	2.16061	ITGA4	Yes	Yes
Peak_44018	chr2	181465890	181466108	-	-	1.06874	1.47112	ITGA4	Yes	Yes
Peak_22096	chr2	182866266	182867616	-1.59407	2.41412	-0.977564	1.51785	FRZB	No	No
Peak_5199	chr2	184596523	184601285	-	-	-1.22071	4.10498	LOC105373780	No	NA
Peak_5939	chr2	186693566	186695808	-1.41791	3.51576	-0.910169	1.99403	FAM171B	No	No
Peak_10896	chr2	186848585	186849763	-1.11049	1.81759	-	-	ZSWIM2	Yes	NA
Peak_27154	chr2	186889094	186889545	-2.14814	3.6925	-1.50034	2.70211	ZSWIM2	Yes	NA
Peak_28868	chr2	187264096	187264599	-	-	1.44875	1.62022	CALCRL	Yes	No
Peak_2993	chr2	187552492	187555043	-	-	-1.34556	1.77559	TFPI	No	Yes
Peak_32068	chr2	189575237	189575444	1.4334	2.28071	-	-	SLC40A1	No	NA
Peak_7635	chr2	190179811	190182382	-0.675892	1.82811	-	-	C2orf88	No	Yes
Peak_30830	chr2	190184033	190184703	-1.09698	1.44792	-	-	C2orf88	No	Yes
Peak_10402	chr2	190627630	190628634	-1.00347	1.42104	-	-	NAB1	No	NA
Peak_7845	chr2	190647832	190648918	-	-	1.01664	2.93648	NAB1	No	NA
Peak_397	chr2	191013136	191014964	0.841854	1.99862	-	-	STAT1	Yes	No
Peak_25774	chr2	191052055	191052260	-	-	-1.86338	1.82604	STAT4	No	Yes
Peak_18188	chr2	191571054	191571597	-	-	-1.50311	1.54468	NABP1	No	Yes
Peak_15457	chr2	193187857	193188647	-	-	-1.20582	1.61527	PCGEM1	No	NA
Peak_29323	chr2	196268435	196268767	-	-	-2.64771	2.90006	HECW2-AS1	No	NA
Peak_22341	chr2	196459471	196459809	-1.9894	1.48214	-1.74077	1.6187	HECW2	No	Yes
Peak_11742	chr2	196592418	196593970	-1.11206	1.32214	-	-	HECW2	No	Yes
Peak_21466	chr2	196987951	196988407	-	-	-1.31537	1.71289	ANKRD44	No	Yes
Peak_25291	chr2	197198786	197199542	-1.06669	1.76618	-1.21407	2.97427	ANKRD44	No	Yes
Peak_23095	chr2	197255708	197256422	-1.5314	1.90504	-1.16834	1.65785	ANKRD44-IT1	No	Yes
Peak_29586	chr2	197293344	197293825	-1.77145	2.44519	-1.68995	2.63187	ANKRD44-IT1	No	Yes
Peak_14	chr2	197432951	197436264	0.618791	1.39674	-	-	SF3B1	Yes	Yes
Peak_4217	chr2	200585502	200586719	-	-	1.17588	2.35671	AOX1	No	NA
Peak_53395	chr2	200694596	200694867	1.77153	1.80583	1.67696	1.91068	AOX3P-AOX2P	No	NA
Peak_324	chr2	200860801	200865110	0.699216	1.49376	-	-	CLK1	No	Yes
Peak_21920	chr2	200866973	200867519	-	-	-0.756444	1.69569	CLK1	No	Yes
Peak_4161	chr2	201232912	201236557	-0.543612	1.98426	-0.811265	4.20071	CASP8	Yes	Yes
Peak_25616	chr2	201260036	201260438	-1.86403	2.2195	-1.78449	2.2503	CASP8	Yes	Yes
Peak_12852	chr2	201260482	201261299	-	-	-0.90262	2.12811	CASP8	Yes	Yes
Peak_7636	chr2	202032068	202033622	-0.912395	1.60119	-	-	FZD7	Yes	NA
Peak_480	chr2	202265326	202268128	-	-	-1.0364	2.3253	NOP58	No	No
Peak_5744	chr2	203327551	203329660	-0.80949	1.38894	-0.839181	1.81315	ABI2	No	No
Peak_25699	chr2	204967424	204967952	-1.36696	2.06051	-1.98029	4.41937	PARD3B	No	No
Peak_32866	chr2	205684885	205685145	-1.78395	1.38746	-	-	NRP2	Yes	No
Peak_18841	chr2	205685607	205686959	-1.24897	1.32699	-	-	NRP2	Yes	No
Peak_17302	chr2	206800645	206801101	-	-	-1.73723	1.44267	CPO	No	NA
Peak_34292	chr2	207107723	207108161	-1.27987	2.52539	-1.34214	3.12005	MIR2355	No	NA
Peak_14124	chr2	207143340	207144253	-	-	-0.832229	1.42398	KLF7	No	Yes
Peak_35521	chr2	207150286	207150639	-1.14403	1.78774	-1.76696	4.27347	KLF7	No	Yes
Peak_4427	chr2	207162842	207166206	0.525735	1.30678	-	-	MYOSLID	No	NA
Peak_7862	chr2	207166292	207167836	-	-	-0.664848	1.50251	MIR7845	No	NA
Peak_20676	chr2	207766109	207767388	-	-	1.30219	4.10498	FZD5	No	Yes
Peak_22205	chr2	208406729	208407222	-1.857	1.30399	-	-	PTH2R	No	NA
Peak_18206	chr2	209423398	209423834	-1.26921	1.58589	-	-	MAP2	No	No
Peak_20982	chr2	213104058	213104829	-1.00687	1.767	-	-	IKZF2	Yes	No
Peak_28602	chr2	213119105	213119587	-1.47318	1.80285	-	-	IKZF2	Yes	No
Peak_1310	chr2	213148085	213151677	-1.09093	1.89316	-1.27831	3.01892	IKZF2	Yes	No
Peak_2730	chr2	213283520	213285253	-	-	-0.785335	1.56211	SPAG16-DT	No	NA
Peak_35039	chr2	216006294	216006827	-1.27057	3.10841	-0.931512	1.9775	MREG	No	No
Peak_26961	chr2	217903948	217904161	-	-	1.80127	2.23022	TNS1	No	Yes
Peak_31081	chr2	217905117	217905542	-1.00727	1.70115	-	-	TNS1	No	Yes
Peak_24442	chr2	217943548	217944097	-	-	1.94547	2.18531	TNS1	No	Yes
Peak_10139	chr2	218009331	218011567	-1.01711	2.05358	-	-	TNS1	No	Yes
Peak_22368	chr2	218257540	218257855	-	-	-1.01271	1.4658	GPBAR1	No	No
Peak_17539	chr2	218387227	218387761	-	-	0.952216	3.43617	SLC11A1	Yes	No
Peak_23756	chr2	218395734	218395975	-	-	1.09061	1.76918	CTDSP1	Yes	Yes
Peak_27857	chr2	218781926	218782657	-	-	1.38514	1.8525	CYP27A1	No	No
Peak_30050	chr2	219057559	219058137	-1.45702	1.89316	-1.1017	1.40351	MIR3131	No	NA
Peak_10081	chr2	219207180	219208146	-	-	0.884263	2.28062	ZFAND2B	No	Yes
Peak_16683	chr2	219217938	219219510	-	-	0.936129	1.38204	ABCB6	Yes	Yes
Peak_12824	chr2	219252547	219255096	-0.995929	1.74735	-0.889004	1.62749	TUBA4A	Yes	No
Peak_17540	chr2	222305175	222306505	-1.40064	1.33928	-1.4661	1.81058	CCDC140	No	NA
Peak_4408	chr2	224585673	224586864	-	-	-1.64026	2.02304	CUL3	No	No
Peak_35159	chr2	226423599	226423970	-	-	-1.84591	2.1592	MIR5702	No	NA
Peak_30513	chr2	230124861	230125140	-1.55482	1.95952	-1.91378	3.45119	LOC107985997	No	NA
Peak_6984	chr2	230415634	230418920	-	-	-0.668172	1.86982	SP100	No	Yes
Peak_55606	chr2	230714791	230715110	1.11865	3.08481	-	-	CAB39	No	No
Peak_7079	chr2	230864892	230867418	-0.761025	1.57281	-	-	ITM2C	No	No
Peak_12971	chr2	231052472	231053336	-	-	-0.868662	1.34031	PSMD1	Yes	Yes
Peak_22827	chr2	231395397	231395672	-	-	1.66484	2.03039	B3GNT7	Yes	Yes
Peak_15562	chr2	231411848	231412508	-1.42703	1.40915	-	-	B3GNT7	Yes	Yes
Peak_16149	chr2	231661952	231662946	-	-	0.602233	1.8219	PTMA	Yes	NA
Peak_2579	chr2	231960848	231962464	-	-	0.623303	1.67698	DIS3L2	Yes	Yes
Peak_4676	chr2	233853359	233855266	0.934921	2.70919	-	-	HJURP	Yes	Yes
Peak_10278	chr2	234494827	234496674	-1.2559	3.0591	-	-	ARL4C	No	Yes
Peak_9868	chr2	234950826	234951800	-1.86028	3.64712	-1.43403	2.90147	SH3BP4	No	No
Peak_11440	chr2	236536925	236539205	-0.776567	1.57869	-0.691287	1.6434	ACKR3	No	Yes
Peak_11493	chr2	236928486	236929025	-	-	-1.5398	2.20438	LOC93463	No	NA
Peak_26518	chr2	237291357	237291937	-1.48658	1.38753	-1.56633	1.7417	LOC105373953	No	NA
Peak_23287	chr2	237617242	237617486	-1.46314	1.51827	-1.66509	2.24002	LRRFIP1	No	Yes
Peak_15941	chr2	237673271	237674321	-0.961064	1.64143	-	-	LRRFIP1	No	Yes
Peak_28580	chr2	237678181	237678376	-1.53122	1.60969	-1.9059	2.86399	LRRFIP1	No	Yes
Peak_2182	chr2	237692164	237695728	-	-	-0.970969	1.76527	LRRFIP1	No	Yes
Peak_17935	chr2	238203861	238204108	1.82858	3.51752	1.5448	2.71003	ILKAP	Yes	Yes
Peak_27050	chr2	239230423	239230900	-0.800619	1.64132	-	-	HDAC4	No	Yes
Peak_20173	chr2	239252864	239253537	-1.47504	3.36415	-1.48875	3.60956	HDAC4	No	Yes
Peak_19105	chr2	239267297	239267559	-1.25883	2.50627	-1.24469	2.00406	HDAC4	No	Yes
Peak_24443	chr2	239319278	239319588	1.04049	1.50154	-	-	HDAC4	No	Yes
Peak_23169	chr2	240557825	240558160	-	-	1.35666	2.49222	ANKMY1	Yes	Yes
Peak_17172	chr2	240997962	240999196	-	-	1.68932	3.53375	SNED1	No	Yes
Peak_19375	chr2	241036152	241037035	-1.03319	1.6542	-	-	SNED1	No	Yes
Peak_12888	chr2	241272939	241273525	0.641963	1.42831	-	-	HDLBP	No	Yes
Peak_29589	chr2	241355159	241355429	1.30155	2.8808	1.83899	7.85127	FARP2	No	No
Peak_22830	chr2	241540825	241541145	-	-	0.891513	1.51144	BOK	No	Yes
Peak_4067	chr2	241685714	241687638	0.944168	1.831	-	-	DTYMK	No	Yes
Peak_7088	chr3	3126234	3128105	-	-	0.505332	1.44132	IL5RA	No	Yes
Peak_13250	chr3	4350970	4351836	-	-	-1.30118	2.52063	SETMAR	No	No
Peak_3583	chr3	4491764	4496479	-0.50189	1.4051	-0.684809	2.57674	ITPR1-DT	No	NA
Peak_16032	chr3	4504062	4505296	-0.898979	3.10214	-	-	ITPR1	Yes	NA
Peak_28509	chr3	4751732	4752034	-1.28245	1.36903	-	-	EGOT	No	Yes
Peak_23807	chr3	4867950	4868387	1.26735	3.26127	1.20964	2.85374	BHLHE40-AS1	No	NA
Peak_17335	chr3	4981289	4982015	-	-	1.36097	2.5436	BHLHE40-AS1	No	NA
Peak_19405	chr3	5026553	5027057	-2.07952	1.40472	-	-	BHLHE40-AS1	No	NA
Peak_2365	chr3	5187563	5189505	0.819142	2.2143	-	-	EDEM1	Yes	No
Peak_42139	chr3	7307044	7307531	-1.20776	1.30507	-	-	GRM7	No	NA
Peak_30741	chr3	8342161	8342357	-	-	1.60113	1.71292	LOC107986010	No	NA
Peak_40847	chr3	8623220	8623556	-1.57567	1.70262	-	-	SSUH2	No	No
Peak_10364	chr3	9749321	9751247	-	-	0.668378	1.86332	OGG1	No	No
Peak_4324	chr3	9843148	9844601	0.800847	2.59347	0.673149	2.05654	RPUSD3	No	No
Peak_14765	chr3	9914913	9916186	-	-	1.44789	2.60473	IL17RC	No	NA
Peak_16260	chr3	10142492	10143269	0.520741	1.48261	-	-	VHL	Yes	Yes
Peak_27062	chr3	11140286	11140496	-2.33706	1.68037	-	-	HRH1	No	NA
Peak_13594	chr3	12796225	12797080	-1.37532	1.87637	-	-	CAND2	Yes	Yes
Peak_14757	chr3	12868035	12869054	-1.57957	2.3067	-	-	LINC02022	No	NA
Peak_30127	chr3	12876246	12876514	-	-	0.988483	1.34563	LINC02022	No	NA
Peak_13102	chr3	12966757	12967668	-	-	1.18224	1.79991	IQSEC1	No	NA
Peak_24606	chr3	13648040	13648379	-	-	-2.39353	1.96206	LINC00620	No	NA
Peak_21731	chr3	13894919	13895473	-1.03407	1.66154	-	-	WNT7A	No	No
Peak_43156	chr3	13933175	13933510	-1.58941	2.02926	-	-	FGD5P1	No	NA
Peak_4913	chr3	14946271	14947595	-	-	-1.46991	1.55966	FGD5-AS1	No	No
Peak_1487	chr3	15792183	15798311	-0.505094	1.91098	-0.676589	2.77137	ANKRD28	No	Yes
Peak_8689	chr3	15860014	15861316	-	-	-0.976868	2.42176	ANKRD28	No	Yes
Peak_31024	chr3	16481363	16481757	-1.49868	1.76066	-1.15508	1.36881	RFTN1	Yes	Yes
Peak_3401	chr3	18422365	18426951	-	-	-1.03726	3.10515	SATB1	Yes	Yes
Peak_1093	chr3	18442514	18445252	-	-	-1.47496	3.81304	SATB1-AS1	No	Yes
Peak_9008	chr3	20038515	20040297	-1.26907	2.14188	-1.30483	2.77367	KAT2B	Yes	No
Peak_11802	chr3	23202356	23204111	-	-	1.0591	2.35318	UBE2E2-DT	No	NA
Peak_34137	chr3	23324924	23325218	-1.99318	1.34302	-3.28488	3.30177	UBE2E2	No	Yes
Peak_22085	chr3	23671763	23672274	-0.868522	1.30596	-	-	UBE2E1	No	No
Peak_7550	chr3	23809769	23811668	-0.523422	1.7136	-	-	UBE2E1	No	No
Peak_37679	chr3	23829821	23830179	-	-	-1.89271	2.70507	UBE2E1	No	No
Peak_667	chr3	23915217	23919317	-	-	-0.492176	1.65295	NKIRAS1	No	No
Peak_10717	chr3	24521043	24522833	-1.47025	4.82221	-1.17774	3.9019	THRB-AS1	No	Yes
Peak_22498	chr3	24588589	24589761	-1.31241	2.18721	-	-	THRB-AS1	No	Yes
Peak_15357	chr3	24677822	24678590	-1.78801	3.37324	-2.21784	5.74563	RARB	Yes	No
Peak_2288	chr3	25661690	25665951	-0.765922	1.52529	-0.88795	2.01497	MIR4442	No	NA
Peak_13912	chr3	25783613	25784371	-	-	-1.1235	1.54859	NGLY1	Yes	Yes
Peak_23515	chr3	28916721	28917221	-1.23807	1.90627	-	-	RBMS3	No	NA
Peak_39311	chr3	30435755	30436259	-	-	-1.34185	2.85935	LINC01985	No	NA
Peak_28238	chr3	30604549	30604876	-	-	-1.05617	2.79042	TGFBR2	Yes	Yes
Peak_29362	chr3	30631734	30631990	-	-	-0.999177	1.69163	TGFBR2	Yes	Yes
Peak_42171	chr3	30658422	30658761	-	-	-1.40593	1.56885	TGFBR2	Yes	Yes
Peak_31026	chr3	31213954	31214467	-1.7663	1.51876	-2.6695	3.74564	MIR466	No	NA
Peak_8880	chr3	31530611	31532467	-	-	-0.884488	2.43493	STT3B	No	No
Peak_3164	chr3	31532527	31537192	-	-	-1.55842	6.99769	STT3B	No	No
Peak_25592	chr3	32321262	32321513	-1.29	1.34795	-	-	CMTM7	No	Yes
Peak_803	chr3	33438258	33441820	0.692777	1.34471	-	-	UBP1	No	No
Peak_6123	chr3	33716820	33719191	-	-	-0.866205	1.67561	CLASP2	No	NA
Peak_2391	chr3	33797841	33799690	-	-	-0.817197	1.38583	PDCD6IP	Yes	No
Peak_23184	chr3	36876619	36876869	-	-	-1.56742	2.71003	TRANK1	No	No
Peak_23216	chr3	37072626	37073162	-	-	-1.12291	2.29948	LRRFIP2	No	No
Peak_6526	chr3	39151015	39153657	0.837453	2.22998	1.00365	2.26776	CSRNP1	No	No
Peak_23317	chr3	39250311	39250607	-	-	-2.02697	1.32151	LOC102724104	No	NA
Peak_3875	chr3	41198343	41199949	-0.906852	1.34183	-1.17489	2.60985	CTNNB1	Yes	NA
Peak_26501	chr3	41419666	41420033	-1.37492	1.58606	-	-	ULK4	Yes	Yes
Peak_1515	chr3	41960786	41962863	-0.823187	1.41284	-0.722984	1.36417	ULK4	Yes	Yes
Peak_38261	chr3	42082049	42082494	-	-	-0.657556	1.3533	TRAK1	Yes	No
Peak_12782	chr3	42501416	42502826	-1.54086	2.49593	-	-	VIPR1	No	No
Peak_12823	chr3	42905613	42907276	-0.65046	1.64115	-	-	ZNF662	No	No
Peak_12413	chr3	42978800	42980067	-	-	-0.763333	1.34871	GASK1A	No	NA
Peak_2324	chr3	43286142	43289514	1.06563	2.1816	0.997574	2.2469	SNRK	No	Yes
Peak_27428	chr3	43769287	43769813	1.32257	2.16821	1.32044	2.19268	ABHD5	No	Yes
Peak_4434	chr3	44337534	44339883	0.799318	1.36221	-	-	TCAIM	No	No
Peak_896	chr3	44974404	44977478	0.618572	1.73989	-	-	EXOSC7	No	Yes
Peak_2275	chr3	45688161	45689138	-	-	-1.77433	1.34031	SACM1L	Yes	No
Peak_5008	chr3	45689248	45691529	-	-	-1.13127	2.45899	SACM1L	Yes	No
Peak_30505	chr3	46701352	46701733	-1.74607	2.1105	-	-	TMIE	No	No
Peak_27479	chr3	47117701	47118037	-	-	-1.50874	1.82673	SETD2	Yes	Yes
Peak_3877	chr3	47512382	47514059	-	-	0.587066	1.38048	ELP6	No	Yes
Peak_15301	chr3	48504218	48504939	-	-	1.16577	2.00817	SHISA5	No	NA
Peak_19509	chr3	48560714	48561200	-1.42412	1.42726	-	-	PFKFB4	Yes	Yes
Peak_15586	chr3	49132807	49134056	-	-	1.55823	1.56067	LAMB2	Yes	No
Peak_13190	chr3	49276453	49277614	-	-	0.707293	1.44639	C3orf62	No	Yes
Peak_5333	chr3	49339140	49340738	0.669451	1.50698	-	-	USP4	No	Yes
Peak_334	chr3	50236102	50239260	-	-	0.935043	1.81058	GNAI2	No	Yes
Peak_7388	chr3	50320338	50322346	-	-	0.936517	3.47899	HYAL2	No	NA
Peak_12447	chr3	50338530	50341636	-	-	-0.868992	3.45954	RASSF1	No	Yes
Peak_46445	chr3	50605837	50606327	-	-	0.798217	1.7341	MAPKAPK3	No	Yes
Peak_42152	chr3	50607797	50608099	-	-	1.28824	4.01671	MAPKAPK3	No	Yes
Peak_7016	chr3	50608914	50612744	-	-	0.690444	2.3351	CISH	No	Yes
Peak_2757	chr3	50617150	50618725	-0.745876	1.57974	-1.09718	4.09917	MAPKAPK3	No	Yes
Peak_27481	chr3	50624215	50624758	-1.56627	2.75205	-1.37888	3.00528	MAPKAPK3	No	Yes
Peak_12299	chr3	51942233	51943134	-	-	1.06534	1.42556	PARP3	No	NA
Peak_22887	chr3	51955865	51956715	-	-	0.889634	1.71733	GPR62	No	No
Peak_39868	chr3	52498473	52498770	-1.54827	2.37476	-	-	STAB1	No	Yes
Peak_19407	chr3	52532581	52533652	-1.18725	2.23053	-0.79426	1.42349	NT5DC2	No	No
Peak_4761	chr3	52704587	52707181	-	-	1.18496	3.76891	SPCS1	Yes	No
Peak_1794	chr3	53890558	53891973	0.861341	1.34183	-	-	SELENOK	No	NA
Peak_30500	chr3	56895121	56895409	-0.930173	1.34123	-0.765839	1.36142	ARHGEF3	No	Yes
Peak_13305	chr3	57078131	57079304	-1.47752	1.8731	-	-	ARHGEF3	No	Yes
Peak_16316	chr3	57164369	57165411	-1.66528	1.31567	-	-	IL17RD	No	No
Peak_7645	chr3	57691209	57693531	-	-	-0.604887	1.57433	DENND6A-DT	No	NA
Peak_34139	chr3	57998627	57998840	-	-	-1.64739	2.59471	FLNB	Yes	No
Peak_1186	chr3	58008383	58010110	-	-	1.72556	1.69219	FLNB	Yes	No
Peak_29337	chr3	58074397	58074777	-1.71592	3.215	-2.16548	5.63263	FLNB	Yes	No
Peak_21580	chr3	58898973	58899788	-1.97308	1.84272	-	-	CFAP20DC	No	NA
Peak_29101	chr3	62445279	62445959	-	-	-1.49701	1.51119	CADPS	Yes	No
Peak_11564	chr3	63913008	63913579	-	-	0.918867	1.36124	ATXN7	Yes	Yes
Peak_26989	chr3	63960124	63960898	-1.48502	1.64203	-1.44862	1.78433	ATXN7	Yes	Yes
Peak_9900	chr3	63967193	63970469	-0.833178	2.15696	-0.816461	2.37104	ATXN7	Yes	Yes
Peak_39471	chr3	65356603	65356956	-1.59762	1.85625	-	-	MAGI1	Yes	Yes
Peak_40636	chr3	65759121	65759394	-	-	-1.91677	2.27843	MAGI1-AS1	No	NA
Peak_26884	chr3	67655529	67655903	-	-	-1.35484	2.73836	SUCLG2-DT	No	NA
Peak_10292	chr3	69012627	69014440	-	-	0.722319	2.06862	EOGT	No	Yes
Peak_5645	chr3	69079056	69080441	-	-	-0.94274	2.28834	UBA3	No	Yes
Peak_31377	chr3	69091457	69091911	-1.03867	1.61979	-1.107	2.26776	ARL6IP5	Yes	Yes
Peak_20869	chr3	69092448	69092876	-1.0281	1.72921	-1.45129	3.2729	ARL6IP5	Yes	Yes
Peak_22286	chr3	69324649	69324937	-	-	-1.60808	2.65739	FRMD4B	Yes	Yes
Peak_5234	chr3	69384134	69386860	-1.38401	2.7527	-1.16718	2.00226	FRMD4B	Yes	Yes
Peak_7165	chr3	69738490	69740671	-	-	0.939005	1.38346	MITF	No	No
Peak_29472	chr3	71066143	71066380	0.930151	1.43402	-	-	FOXP1	Yes	Yes
Peak_21027	chr3	71303576	71304697	-	-	-0.710301	1.51258	FOXP1	Yes	Yes
Peak_33867	chr3	71387794	71388561	-	-	-0.764747	1.71147	FOXP1	Yes	Yes
Peak_31537	chr3	71402797	71403124	-	-	-0.944599	1.51151	FOXP1	Yes	Yes
Peak_24233	chr3	71429030	71429309	1.28605	1.51628	1.72274	2.75695	FOXP1	Yes	Yes
Peak_18526	chr3	71455562	71456734	-0.709088	2.40923	-0.839775	2.26102	FOXP1	Yes	Yes
Peak_25584	chr3	71542273	71542878	-0.930526	1.95949	-1.40806	4.79467	MIR1284	No	NA
Peak_3404	chr3	71576615	71584005	-1.01609	6.19609	-1.271	8.34781	LOC105377155	No	NA
Peak_6001	chr3	71584178	71585828	-	-	-1.06192	2.76421	FOXP1	Yes	Yes
Peak_32334	chr3	71586239	71586651	-	-	-1.5646	1.96371	FOXP1	Yes	Yes
Peak_25813	chr3	71702053	71702768	-1.11536	1.34149	-1.11928	1.72542	FOXP1	Yes	Yes
Peak_8485	chr3	71723696	71725327	-	-	-1.36186	1.86734	EIF4E3	No	No
Peak_16290	chr3	71725516	71725990	0.901623	1.63859	-	-	EIF4E3	No	No
Peak_30538	chr3	72177366	72178013	-0.95315	1.69806	-	-	LINC00870	No	Yes
Peak_35311	chr3	72289311	72289718	-1.19268	2.14455	-	-	LINC00877	No	No
Peak_7739	chr3	81760262	81762364	0.813364	1.57281	-	-	GBE1	No	No
Peak_8394	chr3	86990209	86992060	-	-	-0.917712	1.33832	VGLL3	No	NA
Peak_14867	chr3	87996840	87997670	-	-	-1.25278	1.51444	CGGBP1	No	No
Peak_20101	chr3	88030139	88030775	-	-	-1.16878	1.70889	CGGBP1	No	No
Peak_14381	chr3	88031427	88032513	-	-	-1.23425	1.80182	CGGBP1	No	No
Peak_1180	chr3	88057295	88062009	-	-	-0.641414	1.71606	ZNF654	No	Yes
Peak_13391	chr3	93841509	93841881	-1.43353	1.63843	-1.66248	2.72515	PROS1	Yes	Yes
Peak_353	chr3	94061928	94064173	-	-	-0.639485	1.85269	DHFR2	No	NA
Peak_901	chr3	97763903	97765427	-1.15552	1.3133	-	-	ARL6	No	No
Peak_4385	chr3	98901887	98902751	-	-	-1.19304	1.81774	LOC105374002	No	NA
Peak_20659	chr3	100047746	100048064	-1.88445	3.17146	-1.24588	1.98879	FILIP1L	Yes	NA
Peak_28233	chr3	100073417	100074484	-1.08005	2.26162	-0.879973	1.66109	FILIP1L	Yes	NA
Peak_27408	chr3	100602865	100603662	-	-	-0.948462	2.73465	ADGRG7	No	NA
Peak_25464	chr3	101379963	101380303	-	-	-1.32367	1.38118	SENP7	No	No
Peak_16351	chr3	101848738	101849271	-	-	1.30115	1.40768	NFKBIZ	No	Yes
Peak_6390	chr3	107429387	107432756	-0.689532	1.32033	-	-	LINC01990	No	NA
Peak_3612	chr3	108088628	108091049	-	-	-1.2511	2.82798	CD47	Yes	Yes
Peak_20205	chr3	108091171	108091770	0.982398	2.62898	0.94169	1.35952	CD47	Yes	Yes
Peak_29077	chr3	108125192	108125612	-	-	-0.884873	1.46363	LINC01215	No	No
Peak_5381	chr3	108221098	108223461	-	-	-0.742258	2.1701	IFT57	No	No
Peak_39014	chr3	108546427	108546773	-	-	-1.36003	3.262	MYH15	No	NA
Peak_35704	chr3	111911539	111911711	-1.56894	2.3058	-1.15365	1.69052	PHLDB2	No	NA
Peak_21365	chr3	111913154	111914195	-1.37431	2.87941	-1.30791	4.07706	PHLDB2	No	NA
Peak_23003	chr3	113748778	113749193	-	-	-1.07471	1.66679	ATP6V1A	Yes	No
Peak_11921	chr3	114453968	114455665	-0.766337	1.64653	-	-	ZBTB20	No	Yes
Peak_6783	chr3	115145630	115146936	-	-	-1.44632	3.09904	ZBTB20	No	Yes
Peak_13309	chr3	115512450	115514039	-1.01295	1.55257	-1.2944	2.77137	GAP43	No	Yes
Peak_7860	chr3	115657951	115659270	-0.97995	1.39061	-	-	GAP43	No	Yes
Peak_11087	chr3	119809583	119810681	-0.887463	1.48235	-	-	NR1I2	No	Yes
Peak_7593	chr3	120347751	120350621	-	-	-0.797256	2.23465	LRRC58-DT	No	NA
Peak_11792	chr3	121659940	121661235	-	-	-0.652269	1.66561	HCLS1	Yes	Yes
Peak_29601	chr3	121837619	121837935	1.2976	2.69048	-	-	EAF2	No	Yes
Peak_40317	chr3	122077868	122078161	-	-	-0.897385	1.3562	CD86	Yes	Yes
Peak_24594	chr3	122233218	122233788	-1.61408	1.46637	-1.62632	2.13097	CASR	No	NA
Peak_6655	chr3	122577334	122578697	-0.989583	1.56785	-1.20918	2.23688	PARP15	No	Yes
Peak_39015	chr3	122975106	122975458	-1.61534	1.95485	-	-	SEMA5B	Yes	NA
Peak_23236	chr3	123618434	123618878	-1.4526	2.86627	-1.81228	4.33652	MYLK	No	No
Peak_15852	chr3	123884445	123884964	-1.41126	1.48682	-	-	MYLK	No	No
Peak_2455	chr3	123960298	123961883	0.834091	1.32071	-	-	CCDC14	No	No
Peak_3163	chr3	124729778	124731440	-	-	-0.678108	1.4886	UMPS	No	Yes
Peak_19668	chr3	124834975	124835740	-	-	-1.00681	1.79367	ITGB5	No	Yes
Peak_21024	chr3	125051568	125052636	-	-	-1.01923	1.64599	HEG1	No	No
Peak_32978	chr3	126287555	126288160	-1.82895	2.29606	-	-	KLF15	Yes	Yes
Peak_27917	chr3	126355911	126356636	-	-	2.1422	3.19909	KLF15	Yes	Yes
Peak_10222	chr3	126474341	126476048	0.930666	1.80042	0.797208	1.59644	ZXDC	Yes	Yes
Peak_11008	chr3	126476243	126476806	-	-	1.04243	1.71005	ZXDC	Yes	Yes
Peak_15695	chr3	126523573	126525193	-	-	1.26375	2.96533	CHST13	No	Yes
Peak_15018	chr3	127547940	127548577	-1.55338	1.78298	-1.14635	1.57698	LINC02034	No	NA
Peak_31993	chr3	127820540	127820853	-	-	1.72751	3.2268	MGLL	Yes	Yes
Peak_26589	chr3	127820941	127821453	-	-	1.14709	1.73523	MGLL	Yes	Yes
Peak_13637	chr3	127823350	127823779	-	-	0.911738	1.92812	MGLL	Yes	Yes
Peak_5754	chr3	128483371	128493235	-1.06339	5.38386	-	-	GATA2-AS1	No	No
Peak_17563	chr3	128493291	128494054	-1.08597	1.64053	-	-	GATA2	Yes	No
Peak_15019	chr3	128607858	128608524	1.1681	1.95988	1.34756	2.27158	RPN1	No	NA
Peak_8543	chr3	129119549	129121750	-	-	1.50309	2.69004	RAB43	No	NA
Peak_1887	chr3	129248583	129250768	0.844633	3.27915	0.798798	2.92606	COPG1	No	Yes
Peak_28487	chr3	131386552	131387441	-1.9137	2.70146	-1.21642	1.82798	NUDT16	No	NA
Peak_466	chr3	132658989	132661787	0.952663	1.85925	-	-	UBA5	No	Yes
Peak_20988	chr3	133572569	133573243	-1.49631	1.33839	-1.88999	2.45677	CDV3	No	No
Peak_14644	chr3	133926962	133928285	-0.659401	1.31661	-	-	C3orf36	No	NA
Peak_9982	chr3	134249302	134250602	-	-	-0.939092	1.3831	RYK	No	No
Peak_20788	chr3	134373547	134374011	-	-	1.78669	2.04105	AMOTL2	No	No
Peak_22478	chr3	134406419	134407103	-1.33662	1.61019	-	-	MIR4788	No	NA
Peak_3112	chr3	134484529	134487697	-	-	-0.608129	1.84301	ANAPC13	No	No
Peak_10514	chr3	136750188	136751780	-	-	-0.972995	1.488	STAG1	No	Yes
Peak_17708	chr3	136758363	136758694	-1.88028	3.26258	-2.20621	5.66886	STAG1	No	Yes
Peak_6370	chr3	136818262	136820705	-1.11911	2.99952	-	-	SLC35G2	No	No
Peak_20919	chr3	138200129	138200488	-2.20558	2.85409	-1.49	2.14371	ARMC8	No	Yes
Peak_7270	chr3	138328629	138330297	-	-	-1.03641	2.21766	NME9	No	Yes
Peak_3499	chr3	139388450	139390465	-	-	0.816674	2.13982	COPB2-DT	No	NA
Peak_8952	chr3	139677091	139678040	-1.45529	2.25269	-	-	NMNAT3	No	NA
Peak_24472	chr3	141558272	141558570	-	-	-2.48833	3.19489	RASA2	No	No
Peak_836	chr3	141738196	141739795	-	-	-1.40173	2.04057	GRK7	No	No
Peak_5469	chr3	142026529	142028852	-	-	-1.1945	2.71003	TFDP2	No	No
Peak_26274	chr3	142963005	142963277	-	-	1.93783	2.24594	PAQR9-AS1	No	No
Peak_10631	chr3	143119740	143121390	-1.19008	1.9657	-	-	CHST2	No	Yes
Peak_20112	chr3	143977377	143977953	-	-	-1.85202	3.19918	DIPK2A	Yes	NA
Peak_28747	chr3	148867128	148867358	-	-	1.71433	2.08926	CPA3	No	Yes
Peak_37834	chr3	149507757	149507994	-	-	-1.25461	1.62001	TM4SF4	No	NA
Peak_25199	chr3	149532615	149533039	-1.24921	2.14953	-1.09425	2.38671	WWTR1	Yes	NA
Peak_33947	chr3	150605699	150606453	-0.912897	2.40962	-1.38572	5.72868	SELENOT	No	NA
Peak_38733	chr3	151023558	151023721	1.75817	3.16486	-	-	CLRN1	No	NA
Peak_4297	chr3	152202607	152205891	-1.36442	4.5217	-1.2077	3.04404	MBNL1	No	No
Peak_26590	chr3	152218331	152218897	-	-	1.19139	1.61259	MBNL1	No	No
Peak_5283	chr3	152242930	152247468	-1.21397	4.25093	-	-	MBNL1	No	No
Peak_1030	chr3	152268877	152273230	-0.694043	1.77071	-	-	MBNL1-AS1	No	Yes
Peak_29332	chr3	152298565	152298804	-	-	1.40882	2.11942	MBNL1	No	No
Peak_25255	chr3	152376522	152376826	-1.23132	2.20114	-1.29287	2.22453	TMEM14EP	No	NA
Peak_17044	chr3	152472080	152472691	-	-	-1.39859	2.43309	MBNL1	No	No
Peak_4024	chr3	152834239	152837399	0.595441	1.85689	0.794359	1.92812	P2RY1	No	Yes
Peak_23492	chr3	156484180	156484797	-	-	-1.56946	1.40955	KCNAB1	No	No
Peak_22225	chr3	156606882	156607148	0.997787	1.95658	-	-	SSR3	No	Yes
Peak_22120	chr3	156643401	156643935	1.02626	1.75783	-	-	TIPARP	No	No
Peak_352	chr3	157157784	157161391	0.911944	2.46268	0.759499	1.54675	CCNL1	Yes	Yes
Peak_8140	chr3	159839435	159841549	-	-	-1.02507	2.97012	SCHIP1	No	Yes
Peak_25663	chr3	159844198	159844692	-1.03971	2.25612	-	-	SCHIP1	No	Yes
Peak_9112	chr3	159988316	159990443	-0.581156	1.50384	-	-	IL12A	No	Yes
Peak_361	chr3	160398443	160404856	-	-	-0.727085	3.17617	TRIM59-IFT80	No	NA
Peak_12472	chr3	161104332	161105680	0.633002	1.91873	0.658841	2.16666	NMD3	No	Yes
Peak_267	chr3	167733435	167736788	-	-	-0.975147	2.50888	PDCD10	No	Yes
Peak_26788	chr3	168612616	168613170	-	-	1.379	1.3562	MIR551B	No	NA
Peak_34560	chr3	169142451	169142769	-	-	-2.3944	5.03123	MECOM	Yes	Yes
Peak_2266	chr3	169143326	169147918	-1.33199	2.37756	-1.33558	3.07085	MECOM	Yes	Yes
Peak_26737	chr3	169158951	169159216	-	-	-1.43581	2.373	MECOM	Yes	Yes
Peak_35051	chr3	169250080	169250528	-	-	-1.19316	1.69886	MECOM	Yes	Yes
Peak_20733	chr3	169348634	169349862	-1.55554	2.91833	-1.29549	2.00592	MECOM	Yes	Yes
Peak_22467	chr3	169354235	169355365	-1.73161	1.54218	-1.66456	1.64475	MECOM	Yes	Yes
Peak_6050	chr3	169659798	169662881	-1.53062	2.95662	-	-	MECOM	Yes	Yes
Peak_17565	chr3	169666248	169666993	-1.48475	2.07715	-1.50314	2.77137	MECOM	Yes	Yes
Peak_6237	chr3	169811335	169814145	-	-	-0.562334	1.47525	LRRC34	No	Yes
Peak_8730	chr3	170221802	170223640	-1.06002	1.38894	-	-	PRKCI	Yes	No
Peak_15732	chr3	170418242	170419466	-0.895577	1.58048	-	-	CLDN11	Yes	Yes
Peak_4991	chr3	171458175	171461927	-1.23388	2.54194	-0.911714	1.71872	LOC102724479	No	NA
Peak_24393	chr3	172107301	172107550	-	-	-1.11299	1.68511	FNDC3B	Yes	Yes
Peak_22177	chr3	172520202	172520934	-	-	2.21405	5.46847	TNFSF10	Yes	Yes
Peak_28878	chr3	173548058	173548587	-	-	-1.93367	2.13097	NLGN1	Yes	NA
Peak_20856	chr3	174156163	174156575	-	-	-2.20492	1.32801	NLGN1	Yes	NA
Peak_3294	chr3	174439603	174442385	-	-	-0.731729	2.1472	NAALADL2	No	Yes
Peak_37835	chr3	177145235	177145596	-1.65105	2.53366	-1.74565	4.08718	TBL1XR1	Yes	NA
Peak_21229	chr3	177359459	177359981	-	-	2.05467	3.0058	LINC00501	No	No
Peak_25442	chr3	177647486	177647844	-1.00122	1.6177	-	-	LINC00578	No	NA
Peak_14761	chr3	179260836	179261436	0.636014	1.77657	0.778282	2.72321	KCNMB3	No	Yes
Peak_14762	chr3	179346326	179346757	-	-	-1.07304	1.60241	MFN1	Yes	NA
Peak_2457	chr3	179346798	179348745	-	-	-1.73671	3.12005	MFN1	Yes	NA
Peak_10959	chr3	179652092	179653034	-1.0346	1.50322	-1.35602	3.0058	USP13	No	Yes
Peak_17195	chr3	180679221	180680283	-1.96912	1.48549	-	-	CCDC39	No	No
Peak_1514	chr3	180912069	180914485	0.569141	1.31881	-	-	FXR1	No	No
Peak_22530	chr3	181265907	181266400	-	-	-2.10175	1.53055	SOX2-OT	No	NA
Peak_599	chr3	182792492	182793417	0.989679	2.48438	-	-	ATP11B-DT	No	NA
Peak_2531	chr3	182793478	182795561	-1.68939	2.65207	-1.31127	2.3205	ATP11B	No	No
Peak_662	chr3	184016850	184018630	-	-	0.558812	1.44215	ABCC5	No	No
Peak_5208	chr3	184174798	184176936	-	-	0.666578	2.18852	AP2M1	No	Yes
Peak_11908	chr3	184314789	184315802	-	-	1.33598	1.58136	EIF4G1	Yes	No
Peak_27922	chr3	184315880	184316186	-	-	1.41622	4.04141	EIF4G1	Yes	No
Peak_10811	chr3	184710791	184712848	-0.841475	1.99141	-	-	LOC107986163	No	NA
Peak_2816	chr3	184811818	184813304	-	-	0.99537	2.03125	VPS8	No	Yes
Peak_7989	chr3	185363082	185364019	-	-	-1.55877	2.30039	MAP3K13	No	Yes
Peak_7349	chr3	185822035	185825050	-	-	-0.999594	1.48969	IGF2BP2	Yes	No
Peak_23	chr3	185932122	185938109	-1.30132	2.61778	-1.16799	2.20112	TRA2B	Yes	No
Peak_18181	chr3	185938204	185938529	0.919826	1.63062	-	-	TRA2B	Yes	No
Peak_5370	chr3	186929949	186933590	-	-	0.559274	1.98659	ST6GAL1	Yes	NA
Peak_10290	chr3	188154182	188155050	-	-	0.701674	1.32801	LPP	Yes	Yes
Peak_35292	chr3	188359382	188359710	-	-	-0.87009	1.42513	LPP	Yes	Yes
Peak_26279	chr3	194141732	194142302	1.45942	1.98788	2.02606	3.26747	HES1	Yes	Yes
Peak_16252	chr3	194203519	194204598	-0.730455	1.58606	-	-	LINC02036	No	NA
Peak_19548	chr3	194205910	194206626	-1.36914	2.54452	-0.920106	1.66474	LINC02036	No	NA
Peak_19537	chr3	194315135	194315818	-1.28774	1.40684	-	-	LINC00887	No	NA
Peak_19506	chr3	194324025	194324551	-1.2268	1.95485	-	-	LINC00887	No	NA
Peak_27064	chr3	194396364	194396890	-1.08009	1.34825	-	-	ATP13A3	Yes	No
Peak_19513	chr3	194397030	194398553	-0.92023	1.74922	-0.784453	1.60498	ATP13A3	Yes	No
Peak_37161	chr3	195892971	195893281	-	-	1.03561	1.51724	TNK2	Yes	Yes
Peak_10712	chr3	195906354	195909575	-	-	-0.497474	1.30389	TNK2-AS1	No	Yes
Peak_3402	chr3	196079692	196083037	0.655435	2.75261	0.644922	1.61265	TFRC	Yes	Yes
Peak_23215	chr3	196631890	196632522	-1.98833	2.07907	-1.8561	2.39116	LINC01063	No	Yes
Peak_3979	chr3	196638530	196642867	-0.757783	3.521	-0.634079	1.80626	NRROS	No	Yes
Peak_18874	chr3	197028625	197030208	-0.87362	1.77846	-	-	MELTF	No	NA
Peak_6133	chr3	197749055	197751837	0.70259	1.88313	-	-	FYTTD1	No	No
Peak_21665	chr3	197878270	197878891	-0.889668	1.31584	-	-	LRCH3	No	Yes
Peak_20347	chr4	121014	121486	-	-	1.17343	1.36044	ZNF718	No	Yes
Peak_8396	chr4	472863	474545	0.617208	1.30507	-	-	ZNF721	No	No
Peak_30580	chr4	915195	915939	-1.87913	5.1807	-2.09482	6.99769	GAK	No	Yes
Peak_19951	chr4	984826	985335	-	-	1.10992	1.44718	DGKQ	No	Yes
Peak_12984	chr4	1248890	1250298	-	-	1.03383	4.2715	LOC105374346	No	NA
Peak_22892	chr4	1309344	1310079	-	-	0.728018	1.82507	MAEA	No	No
Peak_13801	chr4	1683153	1684322	-	-	-0.719339	1.31012	FAM53A	No	No
Peak_13500	chr4	1723516	1724085	-	-	1.04781	3.76634	TACC3	No	No
Peak_21967	chr4	1724445	1724805	-	-	0.880509	1.5469	TACC3	No	No
Peak_34435	chr4	1725500	1725780	-	-	0.958736	1.82973	TACC3	No	No
Peak_8077	chr4	2535008	2536362	-1.05863	1.34501	-	-	FAM193A	No	Yes
Peak_19944	chr4	2763727	2764688	-	-	0.830968	1.52792	TNIP2	No	No
Peak_22453	chr4	2811918	2812640	-1.16909	1.44894	-	-	SH3BP2	No	Yes
Peak_16494	chr4	3037867	3038715	-1.13451	4.13183	-0.633722	1.6483	HTT	Yes	Yes
Peak_33426	chr4	3082797	3082978	-	-	1.24248	2.15872	HTT	Yes	Yes
Peak_11503	chr4	3291722	3292848	-	-	1.38586	1.96208	RGS12	No	No
Peak_18610	chr4	3385264	3385722	-	-	0.849088	1.64807	RGS12	No	No
Peak_24368	chr4	3388781	3389662	-0.728759	1.43102	-	-	RGS12	No	No
Peak_8233	chr4	3531215	3533087	-	-	0.777653	2.46392	LRPAP1	No	No
Peak_19214	chr4	4502741	4503412	-	-	-0.913168	1.43648	STX18-IT1	No	No
Peak_27350	chr4	5866194	5866406	-	-	-2.73225	2.69428	CRMP1	No	No
Peak_6216	chr4	6908742	6911090	0.672165	1.45468	1.13407	3.50461	TBC1D14	No	NA
Peak_7038	chr4	6987179	6988116	-	-	1.02725	1.8219	TBC1D14	No	NA
Peak_10473	chr4	7043574	7044552	1.03677	2.18582	1.05276	2.3279	TADA2B	No	Yes
Peak_11504	chr4	7068365	7069275	-1.65514	1.73428	-	-	GRPEL1	No	Yes
Peak_11044	chr4	8198758	8201631	-0.618548	2.05358	-	-	SH3TC1	No	No
Peak_21470	chr4	8201696	8202225	-	-	-0.857809	2.1399	SH3TC1	No	No
Peak_27949	chr4	9380965	9381349	-	-	1.05182	1.41459	LOC105369250	No	NA
Peak_8920	chr4	10114923	10116948	-	-	0.601856	1.9224	WDR1	No	No
Peak_17742	chr4	10456303	10457020	-	-	0.678581	1.42951	ZNF518B	No	Yes
Peak_21965	chr4	13074797	13075205	-2.06006	1.86887	-1.70608	1.8192	RAB28	No	Yes
Peak_5396	chr4	13483271	13485299	-	-	0.769592	1.35123	RAB28	No	Yes
Peak_24920	chr4	13547120	13547849	-1.72801	1.76717	-	-	NKX3-2	No	No
Peak_26540	chr4	13981332	13982123	-1.14442	1.40651	-	-	LOC107986182	No	NA
Peak_27201	chr4	14111774	14112299	-	-	-1.32404	1.56519	LINC01085	No	NA
Peak_6724	chr4	15652709	15655427	-	-	-0.939706	1.7303	FBXL5	No	Yes
Peak_17722	chr4	15755912	15756414	-2.09973	1.68949	-2.24203	2.368	CD38	Yes	Yes
Peak_7132	chr4	15777761	15780280	-	-	-0.735835	1.87835	CD38	Yes	Yes
Peak_33478	chr4	16077956	16078636	-	-	0.925342	1.4117	PROM1	Yes	No
Peak_1936	chr4	16081563	16084881	-0.818115	1.8731	-0.957205	3.0992	PROM1	Yes	No
Peak_4657	chr4	16226658	16229236	-	-	-1.30768	4.48365	TAPT1	No	Yes
Peak_16377	chr4	16231784	16232629	-1.20762	2.05754	-	-	TAPT1	No	Yes
Peak_29148	chr4	16952480	16952952	-2.66748	2.78964	-2.11689	2.61925	LDB2	No	No
Peak_33022	chr4	17781488	17781891	-	-	1.15958	1.4485	FAM184B	No	NA
Peak_3229	chr4	18019970	18023237	-	-	-1.0386	2.13932	LCORL	No	Yes
Peak_29476	chr4	20418629	20419287	-	-	-1.77716	1.69804	SLIT2-IT1	No	NA
Peak_22384	chr4	23292158	23292480	-	-	1.16103	1.31339	LOC105374524	No	NA
Peak_24391	chr4	25843632	25844010	-	-	0.793251	1.49244	SEL1L3	No	NA
Peak_8638	chr4	25861353	25862889	-	-	-1.82343	3.51823	SMIM20	No	Yes
Peak_2921	chr4	26582968	26585024	-	-	-0.816423	1.47658	TBC1D19	No	NA
Peak_20326	chr4	26886070	26886363	-	-	-1.10512	1.38326	STIM2	Yes	No
Peak_4025	chr4	37825366	37828014	-	-	-0.793459	2.54246	PGM2	No	Yes
Peak_24093	chr4	38177066	38177433	-1.89948	2.47143	-1.47771	2.03856	TBC1D1	Yes	Yes
Peak_9549	chr4	38855895	38856959	-	-	-1.28063	1.89678	TLR6	Yes	NA
Peak_19194	chr4	39029957	39031740	-	-	-1.40906	3.65269	TMEM156	No	No
Peak_15306	chr4	39031935	39032461	-	-	-1.57747	1.84174	TMEM156	No	No
Peak_8546	chr4	39044808	39046479	0.708967	1.40544	-	-	KLHL5	No	Yes
Peak_32005	chr4	39946271	39946671	-0.66552	1.378	-0.696899	1.66132	PDS5A	Yes	No
Peak_33583	chr4	40193673	40193895	-	-	1.11445	2.94435	RHOH	Yes	NA
Peak_27202	chr4	40194808	40194979	-	-	0.784868	1.35976	RHOH	Yes	NA
Peak_15104	chr4	40856613	40857419	-	-	-1.02216	1.33832	APBB2	No	NA
Peak_14832	chr4	41256570	41258318	-1.64503	4.39143	-	-	UCHL1-DT	No	NA
Peak_9502	chr4	41359878	41362043	-1.24672	2.87042	-0.990324	2.12191	LIMCH1	No	Yes
Peak_29381	chr4	41362088	41362346	-1.47867	2.76606	-1.15839	1.99403	LIMCH1	No	Yes
Peak_24219	chr4	42396609	42397282	-1.69136	2.13508	-1.25409	1.78731	SHISA3	No	NA
Peak_8626	chr4	42657238	42658488	-0.937593	1.30237	-1.35031	2.71757	ATP8A1	No	Yes
Peak_5242	chr4	44677605	44679860	-	-	-0.835103	1.78261	YIPF7	No	NA
Peak_13458	chr4	47836131	47838191	-1.07171	1.59279	-0.840913	1.36153	CORIN	No	No
Peak_10538	chr4	48016133	48017817	-	-	1.12659	2.18248	CNGA1	No	No
Peak_29001	chr4	48490006	48490680	-1.21343	1.31038	-	-	ZAR1	No	Yes
Peak_23258	chr4	48899379	48899687	-1.15884	1.90013	-0.926882	1.54221	OCIAD2	No	Yes
Peak_17400	chr4	52051124	52052510	-2.13085	3.51752	-	-	SPATA18	No	NA
Peak_26758	chr4	53012390	53013118	-1.17121	1.35415	-	-	LOC101928658	No	NA
Peak_401	chr4	53364627	53366951	-0.779875	1.52824	-0.929614	2.59056	SCFD2	No	No
Peak_14627	chr4	53592724	53593630	-1.17864	3.10669	-	-	LNX1-AS2	No	No
Peak_17401	chr4	54226989	54228255	-1.33689	1.4475	-	-	PDGFRA	Yes	No
Peak_12129	chr4	54539368	54540127	-1.20835	1.78011	-	-	LINC02260	No	NA
Peak_35573	chr4	54661346	54661555	-	-	1.51843	2.25552	KIT	Yes	Yes
Peak_6558	chr4	55947069	55950576	-	-	-0.761026	1.85549	LOC105377663	No	NA
Peak_4143	chr4	56907896	56910482	-	-	-1.40966	2.98657	REST	No	Yes
Peak_13901	chr4	59818377	59819233	-	-	-1.54754	1.52937	LINC02429	No	NA
Peak_16687	chr4	64158610	64158976	-	-	-2.14477	1.30286	TECRL	No	No
Peak_5845	chr4	67543343	67546298	-0.552101	1.56387	-1.07762	3.9806	CENPC	No	No
Peak_15643	chr4	67558514	67559364	-	-	-2.38102	3.78981	STAP1	No	No
Peak_1277	chr4	70992944	70997806	-	-	-0.579545	2.65513	DCK	Yes	No
Peak_26305	chr4	73181299	73181513	-	-	-1.82532	2.96262	ANKRD17	Yes	NA
Peak_5961	chr4	73222430	73223205	-	-	-1.63753	1.38624	ANKRD17	Yes	NA
Peak_19227	chr4	73223252	73223707	-	-	-1.3746	1.46386	ANKRD17	Yes	NA
Peak_20085	chr4	73998152	73998830	-	-	1.12041	1.87138	CXCL5	Yes	NA
Peak_2644	chr4	74037678	74039794	-1.33999	3.76459	-0.979646	2.562	CXCL3	No	No
Peak_13428	chr4	74326904	74330972	-	-	1.26159	5.15924	EPGN	No	No
Peak_29339	chr4	74353671	74354705	-	-	0.98779	1.58009	EREG	No	No
Peak_5128	chr4	74363946	74368577	-	-	1.0132	2.16127	EREG	No	No
Peak_41415	chr4	75698760	75698925	-	-	-1.13805	1.33709	G3BP2	No	Yes
Peak_4762	chr4	75939576	75941486	-0.676337	1.34014	-	-	NAAA	No	Yes
Peak_8234	chr4	77073040	77075381	-	-	-0.778118	1.77472	CCNI	No	Yes
Peak_29480	chr4	77735152	77735418	-	-	-1.1643	2.61364	CNOT6L	No	No
Peak_26502	chr4	80058053	80058763	-	-	-1.00956	1.92392	ANTXR2	No	No
Peak_2765	chr4	80069998	80073951	-	-	-0.864514	3.51061	ANTXR2	No	No
Peak_14185	chr4	80077834	80079843	0.894537	2.64065	-	-	ANTXR2	No	No
Peak_2629	chr4	80183475	80186405	-	-	1.01918	2.39973	PRDM8	No	Yes
Peak_18587	chr4	80196506	80197497	-	-	1.10082	2.12811	PRDM8-AS1	No	NA
Peak_28324	chr4	81204803	81205015	-	-	1.58854	1.41713	PRKG2	Yes	NA
Peak_31480	chr4	81505601	81506048	-1.59968	1.68292	-2.09556	3.24641	RASGEF1B	Yes	No
Peak_30761	chr4	81648734	81649162	-1.57342	1.77286	-1.30126	1.75425	RASGEF1B	Yes	No
Peak_1188	chr4	82370752	82375933	-	-	-0.595653	1.51271	HNRNPD-DT	No	NA
Peak_4706	chr4	83112343	83115233	-0.976429	1.5021	-1.35884	2.86115	PLAC8	Yes	Yes
Peak_22086	chr4	84497996	84498772	-2.46035	1.60205	-	-	NKX6-1	No	NA
Peak_15375	chr4	84582205	84582748	-1.36206	1.37903	-	-	CDS1	No	Yes
Peak_24171	chr4	86960759	86961599	-1.41711	3.51752	-1.43826	4.61882	AFF1	Yes	No
Peak_11881	chr4	88158101	88159450	1.02878	1.74482	-	-	ABCG2	Yes	NA
Peak_3443	chr4	88282663	88285671	-	-	-0.804199	1.92234	PPM1K-DT	No	NA
Peak_24396	chr4	88613381	88613930	-	-	-1.31024	2.43068	HERC3	No	Yes
Peak_13929	chr4	89055548	89057649	-1.1123	1.4887	-1.26492	2.23688	FAM13A	No	No
Peak_16055	chr4	89298922	89299686	-	-	-1.52194	1.89993	GPRIN3	No	No
Peak_6378	chr4	89894367	89899928	-1.08568	2.18609	-	-	MMRN1	No	Yes
Peak_5621	chr4	90126558	90129706	-	-	-0.849961	1.7951	CCSER1	Yes	No
Peak_2845	chr4	94207116	94209074	-	-	-0.7667	1.58992	SMARCAD1-DT	No	NA
Peak_22592	chr4	94520080	94520630	-1.21331	1.65125	-2.11712	5.29961	PDLIM5	No	Yes
Peak_16361	chr4	98352452	98353215	-1.24554	2.77246	-1.15023	3.10515	RAP1GDS1	Yes	No
Peak_412	chr4	98927699	98930617	-	-	-0.888489	1.70464	EIF4E	No	Yes
Peak_15112	chr4	100895424	100896107	-	-	-1.09958	1.55137	LINC01218	No	NA
Peak_28926	chr4	101288800	101289081	-	-	-2.14395	1.93726	MIR1255A	No	NA
Peak_34159	chr4	101306405	101306708	-1.18374	1.64115	-1.03255	1.60524	MIR1255A	No	NA
Peak_10781	chr4	101790383	101791631	-1.18282	1.31162	-	-	BANK1	No	Yes
Peak_17312	chr4	102560088	102560609	-0.96108	1.486	-1.37262	3.57983	NFKB1	Yes	Yes
Peak_9103	chr4	103099060	103099972	-	-	1.48422	1.87425	BDH2	Yes	No
Peak_2407	chr4	103197264	103199174	1.09944	4.41525	-	-	CENPE	Yes	Yes
Peak_8	chr4	105144976	105149268	-	-	-0.576249	2.84038	TET2	Yes	Yes
Peak_9104	chr4	105713927	105714653	-1.58237	1.7693	-2.11739	3.52447	GSTCD	Yes	No
Peak_25809	chr4	105895751	105896718	-1.7671	1.34015	-	-	INTS12	No	Yes
Peak_14565	chr4	107799911	107800336	-	-	-1.65245	2.20033	SGMS2	Yes	No
Peak_15423	chr4	108167087	108169276	-1.48027	1.39451	-	-	LEF1	Yes	Yes
Peak_24028	chr4	109046489	109047159	-1.67129	1.83456	-	-	COL25A1	Yes	No
Peak_22173	chr4	109302151	109302968	-1.96548	1.63859	-	-	COL25A1	Yes	No
Peak_3814	chr4	109559488	109561777	-1.07479	2.75261	-	-	MCUB	No	NA
Peak_7160	chr4	109701468	109704350	-0.69369	1.94194	-	-	CASP6	No	NA
Peak_27934	chr4	110622860	110623316	-2.12048	1.84297	-	-	PITX2	No	NA
Peak_19941	chr4	112145011	112145262	-	-	1.03508	2.60765	FAM241A	No	NA
Peak_12414	chr4	112515041	112516011	-1.81499	1.54427	-	-	NEUROG2-AS1	No	NA
Peak_19221	chr4	113978973	113980179	-1.91908	2.18747	-	-	ARSJ	No	No
Peak_33664	chr4	116925802	116926258	-2.14548	1.43822	-	-	LOC107986306	No	NA
Peak_10327	chr4	117085032	117086032	-1.85135	2.40962	-	-	TRAM1L1	No	No
Peak_15404	chr4	118888468	118889270	-	-	-1.24382	2.05654	SYNPO2	Yes	NA
Peak_1467	chr4	119211438	119214209	-	-	-0.78386	1.93473	LOC101929762	No	NA
Peak_25073	chr4	123257703	123258024	-	-	-1.64748	2.22113	SPRY1	No	No
Peak_5933	chr4	123396221	123400950	-0.911924	1.98484	-	-	SPRY1	No	No
Peak_26288	chr4	123443876	123444678	-1.76812	3.09305	-1.48319	3.4141	SPRY1	No	No
Peak_25776	chr4	123744947	123745404	-1.25719	1.69813	-	-	LINC01091	No	No
Peak_3901	chr4	124710272	124712729	-	-	-1.1095	2.76559	ANKRD50	No	NA
Peak_10170	chr4	127781456	127783619	-	-	0.726827	1.88689	HSPA4L	No	Yes
Peak_26289	chr4	127963964	127964295	-	-	0.698304	1.48341	MFSD8	No	NA
Peak_17032	chr4	138241880	138242364	0.830269	1.49821	-	-	SLC7A11	No	Yes
Peak_15480	chr4	139266332	139267050	-	-	-0.979438	1.61884	MGARP	No	No
Peak_29201	chr4	139455263	139455586	1.03311	2.04684	-	-	RAB33B	No	Yes
Peak_33580	chr4	140070452	140070795	-	-	-1.03749	1.51258	LOC101927516	No	NA
Peak_26707	chr4	140095071	140096054	-1.42774	3.02537	-0.921922	1.659	LOC101927516	No	NA
Peak_24015	chr4	140243156	140243768	-1.17133	1.96433	-	-	SCOC	No	Yes
Peak_28323	chr4	140567679	140568233	-1.61205	1.85373	-	-	UCP1	No	NA
Peak_2140	chr4	141635772	141637661	-0.795308	1.89299	-	-	IL15	Yes	No
Peak_1985	chr4	142844396	142847860	-1.12795	2.2421	-	-	INPP4B	Yes	No
Peak_1120	chr4	145097037	145100056	-	-	-0.769662	1.51151	ANAPC10	No	Yes
Peak_258	chr4	145937685	145939423	-1.28431	1.83655	-1.65485	3.12005	ZNF827	No	Yes
Peak_18489	chr4	147057337	147057982	-	-	-0.995231	1.97436	LOC105377476	No	NA
Peak_14159	chr4	148216895	148217649	-1.31038	1.31946	-1.23333	1.66865	NR3C2	Yes	No
Peak_25393	chr4	148375937	148376539	-	-	-2.27964	2.38671	NR3C2	Yes	No
Peak_831	chr4	151011631	151016849	-0.602315	3.22529	-0.611495	2.73679	LRBA	Yes	No
Peak_465	chr4	151099040	151101835	-	-	-0.735394	2.87357	RPS3A	Yes	No
Peak_11761	chr4	151407904	151409021	-1.06362	1.32897	-	-	FHIP1A-DT	No	NA
Peak_25557	chr4	153138771	153139238	-1.16402	1.3133	-	-	TRIM2	No	No
Peak_27482	chr4	153256958	153257577	-1.64758	3.76459	-0.861964	1.61265	TRIM2	No	No
Peak_29474	chr4	155638988	155639376	-	-	-1.70877	1.75454	GUCY1A1	No	NA
Peak_5274	chr4	155666280	155669242	-1.42369	3.37906	-1.2469	2.86845	GUCY1A1	No	NA
Peak_30795	chr4	157220401	157220782	-1.81541	1.34149	-	-	GRIA2	No	No
Peak_22228	chr4	158599086	158599490	-1.60567	2.12791	-	-	RXFP1	Yes	No
Peak_2882	chr4	158722218	158723983	-	-	0.756142	1.80182	PPID	Yes	Yes
Peak_35062	chr4	158810134	158810631	-1.50095	3.51754	-1.52932	4.32318	FNIP2	No	No
Peak_22158	chr4	159041421	159042440	-1.07886	1.50293	-	-	C4orf45	No	No
Peak_20335	chr4	159179509	159180534	-0.647807	1.41533	-	-	RAPGEF2	No	NA
Peak_23467	chr4	159206351	159206699	-	-	-0.848034	1.54468	RAPGEF2	No	NA
Peak_15680	chr4	159400701	159401747	-	-	-1.08263	1.9686	RAPGEF2	No	NA
Peak_1436	chr4	163493670	163496266	-	-	-0.625559	1.60563	TMA16	No	Yes
Peak_13276	chr4	163549869	163550707	-1.45932	1.51566	-	-	TMA16	No	Yes
Peak_1894	chr4	168317717	168319653	-	-	-0.755615	1.59408	DDX60	Yes	Yes
Peak_30557	chr4	168421641	168421953	-1.06473	1.38038	-	-	DDX60L	Yes	Yes
Peak_12093	chr4	168831473	168833405	-1.28665	2.14953	-	-	PALLD	Yes	Yes
Peak_16278	chr4	168877435	168878142	-1.09609	2.0574	-0.779295	1.35976	PALLD	Yes	Yes
Peak_13651	chr4	169079630	169080813	-0.716466	1.96712	-0.970958	4.25357	CBR4	No	Yes
Peak_32260	chr4	169292513	169292721	1.25398	1.64423	1.09127	1.56067	SH3RF1	No	Yes
Peak_6968	chr4	170025656	170027236	1.08428	1.31451	1.30467	1.95795	MFAP3L	No	No
Peak_15077	chr4	171812293	171814137	-	-	1.14417	1.99845	GALNTL6	No	NA
Peak_2558	chr4	177440802	177443305	-	-	-0.785484	2.74372	AGA	Yes	No
Peak_36001	chr4	181971327	181971759	-	-	-1.75225	1.77788	TEMN3-AS1	No	NA
Peak_25334	chr4	182139689	182139968	-1.77373	1.35862	-1.50221	1.3562	TENM3-AS1	No	NA
Peak_11387	chr4	183407279	183407820	-	-	-2.58766	2.12469	CDKN2AIP	No	NA
Peak_4062	chr4	183443273	183446856	0.444674	1.32918	-	-	CDKN2AIP	No	NA
Peak_23516	chr4	183455415	183456051	-1.16687	1.78787	-	-	CDKN2AIP	No	NA
Peak_41287	chr4	183765422	183765952	-	-	1.55948	2.819	STOX2	Yes	Yes
Peak_21970	chr4	183906562	183907445	-1.44212	2.12791	-	-	STOX2	Yes	Yes
Peak_8905	chr4	184028191	184029325	-1.38667	3.22786	-1.23489	3.70845	STOX2	Yes	Yes
Peak_17023	chr4	184039890	184040619	-1.53294	2.51153	-1.22927	2.22742	STOX2	Yes	Yes
Peak_26747	chr4	184534855	184535094	-1.77567	2.70757	-1.80775	3.10129	LINC02427	No	NA
Peak_3359	chr4	184536564	184538555	0.812153	2.02484	0.640067	1.42725	LINC02427	No	NA
Peak_21971	chr4	185127448	185128062	-1.47976	1.33299	-	-	SLC25A4	No	Yes
Peak_21972	chr4	185128288	185129225	-1.2512	2.44556	-0.709784	1.30321	SLC25A4	No	Yes
Peak_18394	chr4	185470609	185471062	-	-	1.31829	1.30744	CCDC110	No	No
Peak_8597	chr5	891635	893620	0.62965	1.89769	0.562532	1.69569	BRD9	Yes	Yes
Peak_29064	chr5	5494478	5494702	-2.29527	1.78787	-	-	ICE1	No	No
Peak_306	chr5	10248910	10252009	-	-	0.598038	1.9643	ATPSCKMT	No	NA
Peak_9107	chr5	10441095	10442811	-1.2255	1.71578	-	-	ROPN1L-AS1	No	NA
Peak_24930	chr5	10445198	10445642	0.653296	1.53287	-	-	ROPN1L	No	Yes
Peak_15029	chr5	10562978	10564204	-	-	1.17166	3.63275	ANKRD33B	No	Yes
Peak_16320	chr5	10761468	10762112	-1.19215	1.90322	-	-	DAP	No	Yes
Peak_13261	chr5	14010894	14012231	-1.24273	1.74657	-1.72397	3.55889	DNAH5	Yes	NA
Peak_28529	chr5	14675567	14676119	-0.712544	1.36719	-	-	OTULIN	No	NA
Peak_28530	chr5	14676299	14676730	-1.39725	2.24775	-1.6623	3.88893	OTULIN	No	NA
Peak_7817	chr5	31638197	31640581	-0.907239	1.85307	-	-	PDZD2	Yes	Yes
Peak_9709	chr5	32020205	32020660	-	-	-0.875975	1.51606	PDZD2	Yes	Yes
Peak_10297	chr5	32311320	32313012	-	-	1.02287	3.15591	MTMR12	No	NA
Peak_4283	chr5	32585438	32587331	-	-	-0.614402	1.34157	SUB1	No	Yes
Peak_2862	chr5	32708735	32716602	-1.19553	5.63532	-1.19365	6.2289	NPR3	No	No
Peak_22195	chr5	32725748	32726722	-1.65624	1.43243	-1.93751	2.32488	NPR3	No	No
Peak_1199	chr5	33439472	33442297	-	-	-0.712818	1.84588	TARS1-DT	No	NA
Peak_31832	chr5	33737082	33737336	-	-	-1.6635	1.84053	ADAMTS12	Yes	No
Peak_668	chr5	34929533	34931275	-	-	-0.912363	1.54859	DNAJC21	No	Yes
Peak_30780	chr5	35664613	35664907	-1.6784	1.32292	-	-	SPEF2	Yes	No
Peak_1309	chr5	36150590	36153183	-	-	-0.762548	1.54735	SKP2	Yes	Yes
Peak_23004	chr5	36242607	36243147	1.23717	2.2902	1.53173	4.70135	NADK2	No	No
Peak_5786	chr5	36605900	36607597	-1.28293	2.40819	-0.947876	1.97	SLC1A3	No	Yes
Peak_138	chr5	36874489	36879415	-	-	-0.943326	2.96533	NIPBL	Yes	No
Peak_35585	chr5	37552744	37553244	-	-	-1.42512	1.6384	WDR70	No	No
Peak_22122	chr5	39076960	39077674	-1.53016	1.88172	-1.60873	2.68216	RICTOR	Yes	No
Peak_15942	chr5	39274606	39275534	-	-	-1.12278	1.96968	FYB1	Yes	NA
Peak_2668	chr5	40678089	40684044	-0.742016	3.54505	-	-	PTGER4	No	Yes
Peak_1605	chr5	40833256	40835970	0.413629	1.34072	-	-	RPL37	Yes	No
Peak_2631	chr5	41869132	41871217	-	-	0.474476	1.4103	OXCT1-AS1	No	Yes
Peak_32012	chr5	42591113	42591379	-	-	-1.20924	1.38899	GHR	Yes	NA
Peak_3227	chr5	43018797	43020895	-	-	-1.01569	1.85026	LOC105374748	No	NA
Peak_4439	chr5	43037281	43043600	0.540891	1.92893	-	-	LOC153684	No	NA
Peak_30197	chr5	43063942	43064185	0.657349	1.38346	-	-	LOC100506639	No	NA
Peak_413	chr5	43064422	43068898	0.515715	2.02611	-	-	LOC100506639	No	NA
Peak_6346	chr5	50665937	50668968	-1.60861	6.19609	-1.2126	5.84645	PARP8	Yes	Yes
Peak_29038	chr5	50711511	50712058	-	-	-0.957586	1.51271	PARP8	Yes	Yes
Peak_14340	chr5	52944953	52945533	-	-	-1.05503	1.80116	ITGA1	Yes	No
Peak_7529	chr5	54517676	54519217	-	-	0.544947	1.457	SNX18	Yes	No
Peak_48474	chr5	54646268	54646941	-1.31856	2.84262	-1.28515	3.37684	LOC105378969	No	NA
Peak_15440	chr5	54883368	54884089	-1.00975	1.49589	-	-	ESM1	Yes	No
Peak_14827	chr5	55173408	55173958	-	-	-1.79244	1.39207	CDC20B	No	NA
Peak_29252	chr5	55821849	55822166	-1.79996	1.8257	-	-	IL31RA	No	NA
Peak_21726	chr5	56050672	56051195	-	-	-2.20798	1.31851	LOC105378976	No	NA
Peak_23493	chr5	56838661	56838965	-	-	-1.03974	1.35087	MAP3K1	Yes	Yes
Peak_2298	chr5	59037153	59040881	-1.03529	5.44433	-1.29239	8.69382	PDE4D	Yes	Yes
Peak_24156	chr5	59296832	59297387	0.993729	1.32625	-	-	PDE4D	Yes	Yes
Peak_11323	chr5	61625241	61627164	-1.09457	3.27452	-	-	C5orf64	No	NA
Peak_5696	chr5	62578694	62583230	-0.747924	2.31512	-0.640664	1.9121	LRRC70	No	Yes
Peak_1297	chr5	65479873	65483801	-	-	-1.14226	1.3493	ADAMTS6	No	No
Peak_7438	chr5	67003555	67008092	-0.621957	1.86887	-0.618686	1.99389	MAST4-AS1	No	No
Peak_44839	chr5	67215830	67216000	-	-	1.33938	1.35976	CD180	Yes	Yes
Peak_29643	chr5	67360171	67360565	-1.65094	2.15024	-1.29263	1.99585	LOC101928858	No	NA
Peak_20863	chr5	68240192	68240739	-	-	-1.63283	1.96968	PIK3R1	Yes	Yes
Peak_20742	chr5	68255367	68256136	-	-	-0.658934	1.59512	PIK3R1	Yes	Yes
Peak_12818	chr5	68287897	68289194	-	-	1.07859	2.59056	PIK3R1	Yes	Yes
Peak_5127	chr5	69042901	69043776	0.905443	1.61598	-	-	LINC02198	No	NA
Peak_13252	chr5	72556134	72557601	-1.09631	2.14455	-	-	LINC02056	No	NA
Peak_3480	chr5	72815566	72818367	-	-	-0.745598	1.35045	TNPO1	No	Yes
Peak_2186	chr5	72847848	72849978	-	-	-1.06024	2.90508	TNPO1	No	Yes
Peak_4766	chr5	74684850	74686597	-	-	-0.667429	1.72463	HEXB	No	No
Peak_28157	chr5	75558990	75559508	-	-	-1.66088	1.75936	POLK	No	No
Peak_4919	chr5	76714520	76718145	-	-	-0.704757	1.92234	F2R	Yes	NA
Peak_1663	chr5	76818255	76821539	-0.967334	3.21137	-	-	F2RL1	No	Yes
Peak_1563	chr5	76951748	76956528	-0.976954	4.35054	-0.537753	1.45378	CRHBP	No	Yes
Peak_32270	chr5	76958344	76958838	-	-	1.00538	1.84377	CRHBP	No	Yes
Peak_4432	chr5	77490647	77492563	-	-	-1.147	2.33688	WDR41	No	No
Peak_10167	chr5	77774792	77776897	0.728533	1.77071	-	-	TBCA	No	Yes
Peak_25668	chr5	77972038	77972780	-1.9584	3.51752	-1.24357	2.35686	LOC101929154	No	NA
Peak_1135	chr5	78293603	78296121	-1.06655	1.5596	-1.0387	2.03437	AP3B1	No	No
Peak_1203	chr5	78507390	78511027	-0.479199	1.36211	-0.605149	1.94852	LHFPL2	No	Yes
Peak_6222	chr5	79235292	79239007	-0.620245	1.88636	-	-	JMY	Yes	No
Peak_24197	chr5	80754851	80755872	-0.846803	1.42427	-1.10186	2.82243	MSH3	Yes	No
Peak_25712	chr5	81233085	81233837	-1.22549	2.05458	-1.03689	1.92726	CKMT2	Yes	No
Peak_5531	chr5	81748361	81750468	-0.679115	1.77928	-0.863332	3.22879	SSBP2	No	No
Peak_13808	chr5	81751490	81752291	-	-	0.780375	1.41736	SSBP2	No	No
Peak_3659	chr5	81970717	81971871	-1.43719	1.86633	-1.41615	2.3253	ATG10	No	Yes
Peak_33963	chr5	87340639	87340890	-2.34844	1.77955	-2.34	2.21429	RASA1	Yes	NA
Peak_8802	chr5	88502243	88503369	-	-	-1.26568	1.33543	LINC02060	No	NA
Peak_22377	chr5	88784868	88785258	-	-	1.2962	2.113	MEF2C	Yes	No
Peak_21247	chr5	88785802	88786306	-	-	1.20896	1.6997	MEF2C	Yes	No
Peak_30764	chr5	88836462	88836827	-	-	1.30595	2.40633	MEF2C	Yes	No
Peak_9199	chr5	88888880	88890882	-1.08797	1.44922	-	-	MEF2C-AS1	No	NA
Peak_29236	chr5	91469209	91469759	-	-	-1.54358	2.63187	LOC107986434	No	NA
Peak_22400	chr5	95027584	95028010	-1.57953	2.08101	-1.71513	3.26353	MCTP1	No	Yes
Peak_44108	chr5	95406551	95406920	-	-	-2.01006	1.75625	FAM81B	No	No
Peak_13283	chr5	95619524	95620792	-1.0511	1.78774	-1.13589	2.32234	GPR150	No	Yes
Peak_22257	chr5	95620942	95621851	-0.905096	1.34014	-	-	GPR150	No	Yes
Peak_28566	chr5	95622384	95622685	-	-	-1.3054	1.3948	GPR150	No	Yes
Peak_13027	chr5	95834248	95835317	-	-	-0.855593	1.64663	LINC01554	No	No
Peak_4333	chr5	95959779	95961868	0.800203	1.81933	-	-	ELL2	No	NA
Peak_18602	chr5	96816314	96817596	-1.12305	2.3705	-1.10829	2.99382	ERAP1	No	Yes
Peak_1498	chr5	96875835	96878036	-	-	-0.794633	1.75936	ERAP2	No	Yes
Peak_2065	chr5	96933023	96938061	-	-	-0.976925	4.11501	LNPEP	No	Yes
Peak_16598	chr5	99027109	99027791	-	-	-1.1914	1.52798	CHD1	Yes	No
Peak_16224	chr5	100731707	100732209	-	-	-1.1943	1.30384	MIR548P	No	NA
Peak_907	chr5	100900931	100905073	-	-	-1.2519	1.66452	ST8SIA4	Yes	Yes
Peak_5337	chr5	102754064	102756586	-0.863069	1.3598	-	-	PAM	No	Yes
Peak_6250	chr5	108727028	108729318	-	-	-0.51847	1.45293	LINC01023	No	Yes
Peak_1730	chr5	111755552	111758584	-	-	-0.82619	2.10041	NREP	Yes	Yes
Peak_3234	chr5	112707060	112709038	0.508215	1.45265	-	-	APC	Yes	No
Peak_2077	chr5	112976133	112978513	0.462841	1.55257	-	-	DCP2	No	Yes
Peak_1861	chr5	115541375	115544870	0.925768	2.16738	-	-	FEM1C	No	Yes
Peak_23820	chr5	116576394	116576758	-1.80929	1.76618	-	-	SEMA6A-AS2	No	NA
Peak_7866	chr5	117454786	117455891	-1.49383	1.89563	-1.28283	1.74791	LINC00992	No	NA
Peak_12660	chr5	119355088	119356822	0.708109	3.40377	-	-	TNFAIP8	No	No
Peak_6116	chr5	121961009	121963587	-	-	-1.28867	3.26312	SRFBP1	No	NA
Peak_269	chr5	122775018	122777450	-	-	-0.763135	2.28475	SNX2	No	No
Peak_27000	chr5	124057010	124057455	-1.65249	2.01202	-1.41406	2.00605	LOC101927397	No	NA
Peak_20132	chr5	124649927	124650466	-1.67457	1.36385	-	-	ZNF608	Yes	No
Peak_14910	chr5	124651356	124652518	-	-	-1.40277	2.22996	ZNF608	Yes	No
Peak_21528	chr5	124735121	124735790	-0.76643	1.50811	-0.852616	1.68034	ZNF608	Yes	No
Peak_16645	chr5	125200384	125201160	-1.30195	2.14188	-	-	LOC101927421	No	NA
Peak_53151	chr5	125205826	125206166	-1.76004	2.21268	-1.65948	2.55825	LOC101927421	No	NA
Peak_48359	chr5	125485049	125485301	-1.93885	1.89563	-1.51939	1.8348	LINC02240	No	NA
Peak_25500	chr5	126353960	126354413	-	-	-1.96632	2.20112	GRAMD2B	No	NA
Peak_2694	chr5	126777136	126779423	-	-	-0.951982	1.88242	LMNB1	Yes	Yes
Peak_20817	chr5	126987670	126988775	-1.08242	1.51897	-	-	MARCHF3	No	NA
Peak_3694	chr5	127517570	127518889	-	-	-0.969125	1.74743	PRRC1	No	Yes
Peak_14186	chr5	130836635	130837198	-	-	-1.72162	1.57078	LOC107986449	No	NA
Peak_28753	chr5	131253010	131253313	-	-	-1.35495	2.09121	CDC42SE2	No	Yes
Peak_26312	chr5	131266323	131266760	0.59302	1.5755	-	-	CDC42SE2	No	Yes
Peak_28646	chr5	131515180	131515548	-	-	-1.72022	2.50634	RAPGEF6	Yes	No
Peak_40042	chr5	131545846	131546294	-	-	-1.25792	1.35932	RAPGEF6	Yes	No
Peak_15097	chr5	131546942	131548482	-0.734567	1.63417	-1.42109	5.03141	RAPGEF6	Yes	No
Peak_24397	chr5	131747412	131747969	-1.22359	1.5972	-2.10645	4.06937	FNIP1	No	No
Peak_469	chr5	131794612	131797071	-	-	-0.840358	2.07395	RAPGEF6	Yes	No
Peak_38080	chr5	132420514	132421223	-	-	-1.12439	1.75368	IRF1-AS1	No	NA
Peak_26821	chr5	132456356	132456614	-	-	-1.25264	1.34375	RAD50	No	No
Peak_3226	chr5	132487449	132490834	-	-	-0.921546	2.73909	IRF1	Yes	Yes
Peak_9371	chr5	132496218	132497493	-	-	0.852273	1.65128	IRF1	Yes	Yes
Peak_20582	chr5	132746893	132747691	-1.25531	1.41351	-	-	CCNI2	No	NA
Peak_26313	chr5	132819433	132820021	-1.68006	2.90327	-1.24175	2.31463	SHROOM1	No	Yes
Peak_19952	chr5	132822902	132823375	-1.53478	2.87009	-	-	SHROOM1	No	Yes
Peak_31238	chr5	134545179	134545564	-0.892124	1.33493	-1.24435	2.35686	JADE2	No	Yes
Peak_20741	chr5	135359445	135361359	0.441541	1.3376	-	-	MACROH2A1	No	NA
Peak_29239	chr5	135372800	135373228	-1.62785	2.92935	-1.49498	3.26614	MACROH2A1	No	NA
Peak_6392	chr5	135395793	135400645	-	-	-0.480724	1.67261	MACROH2A1	No	NA
Peak_25666	chr5	136080046	136080535	-1.50903	1.69177	-	-	VTRNA2-1	Yes	No
Peak_6516	chr5	136131987	136134008	-0.988348	1.35302	-	-	SMAD5	Yes	No
Peak_33955	chr5	137563867	137564717	-1.23275	1.65125	-	-	SPOCK1	No	NA
Peak_35652	chr5	137734046	137734496	-1.50603	1.99862	-	-	KLHL3	No	No
Peak_27299	chr5	138240826	138241135	-2.19004	1.73572	-2.31292	2.26049	CDC23	No	Yes
Peak_20925	chr5	138610853	138611858	-1.132	2.38536	-	-	CTNNA1	No	Yes
Peak_10178	chr5	139272575	139274756	-0.927925	2.16821	-	-	SNHG4	No	Yes
Peak_7848	chr5	139480507	139482957	-0.590957	1.31372	-	-	STING1	Yes	NA
Peak_19213	chr5	139637553	139638734	-	-	0.967077	1.39136	CXXC5	Yes	No
Peak_27206	chr5	139658866	139659612	-	-	0.861107	1.75717	CXXC5	Yes	No
Peak_18159	chr5	139670167	139671133	-1.37338	5.82619	-0.885447	2.42519	CXXC5	Yes	No
Peak_23823	chr5	139697608	139697967	-1.25775	1.60415	-	-	PSD2	No	NA
Peak_12448	chr5	139711505	139712224	-1.69802	3.38145	-	-	PSD2	No	NA
Peak_24256	chr5	139903685	139904539	-1.61757	1.48453	-	-	NRG2	Yes	No
Peak_33956	chr5	140116201	140116580	-	-	-1.22397	1.74023	PURA	No	No
Peak_13646	chr5	140145951	140146590	-1.6115	2.02484	-	-	LOC101929719	No	NA
Peak_26748	chr5	140180959	140181456	1.10121	1.44178	-	-	CYSTM1	No	Yes
Peak_8951	chr5	140639372	140640308	-	-	0.676439	1.35368	TMCO6	No	No
Peak_19028	chr5	140711331	140711665	-	-	-1.9624	2.04309	VTRNA1-1	No	NA
Peak_19954	chr5	140926707	140927405	-1.7128	1.34014	-	-	PCDHAC1	Yes	NA
Peak_17311	chr5	141382605	141383247	-	-	-1.9689	1.30999	PCDHGA7	Yes	No
Peak_12130	chr5	141475517	141477270	-1.05721	1.34795	-	-	PCDHGC3	No	Yes
Peak_31200	chr5	141484462	141484701	-	-	-1.45864	1.73931	PCDHGC4	No	Yes
Peak_28701	chr5	141491970	141492876	-1.43669	2.71786	-	-	PCDHGC5	No	Yes
Peak_11808	chr5	141512405	141514071	-0.941758	1.73869	-	-	PCDHGC4	No	Yes
Peak_16025	chr5	142324149	142325374	-	-	1.94667	1.75054	SPRY4-AS1	No	NA
Peak_22469	chr5	143222471	143223176	-1.6706	6.19609	-1.51159	6.50259	ARHGAP26	Yes	Yes
Peak_33455	chr5	143352901	143353272	-	-	-0.780133	1.57818	NR3C1	Yes	No
Peak_18160	chr5	143353693	143354492	-0.970163	2.12323	-1.05774	3.15436	NR3C1	Yes	No
Peak_4675	chr5	143401282	143403804	1.11823	2.2195	-	-	NR3C1	Yes	No
Peak_9535	chr5	143434932	143435652	-	-	-1.40413	1.73449	NR3C1	Yes	No
Peak_23419	chr5	148401960	148402249	-	-	-0.993044	1.62429	FBXO38	Yes	No
Peak_29342	chr5	148808882	148809091	-	-	-1.22011	1.33569	ADRB2	Yes	Yes
Peak_6512	chr5	148825619	148827210	0.801195	1.78576	-	-	ADRB2	Yes	Yes
Peak_348	chr5	150409717	150412966	-0.75863	1.30828	-1.03264	2.50523	CD74	Yes	Yes
Peak_14588	chr5	150656090	150656690	-1.12474	1.49823	-	-	MYOZ3	No	Yes
Peak_25711	chr5	150781547	150782106	0.667676	1.39298	0.777519	1.83736	SMIM3	No	No
Peak_16295	chr5	151020175	151021252	-	-	-1.10781	1.65802	GPX3	Yes	No
Peak_22486	chr5	151086506	151087251	-0.68123	1.41351	-	-	TNIP1	Yes	No
Peak_23219	chr5	151150167	151150921	-	-	-1.52269	3.65761	ANXA6	No	Yes
Peak_7221	chr5	151222245	151224558	-	-	-0.683486	1.64702	CCDC69	No	Yes
Peak_16253	chr5	154405027	154405722	-1.20427	1.3294	-	-	GALNT10	No	No
Peak_30944	chr5	154654369	154654654	-	-	1.16238	1.85691	MIR1303	No	NA
Peak_3107	chr5	154856995	154861602	-	-	-0.517553	1.4	FAXDC2	No	NA
Peak_46453	chr5	157108911	157109142	-	-	-1.74833	1.8508	HAVCR2	Yes	Yes
Peak_14352	chr5	157670502	157671836	-1.0312	1.66087	-	-	C5orf52	No	NA
Peak_28432	chr5	158642650	158642851	-2.27542	1.65711	-2.15315	1.9121	EBF1	Yes	NA
Peak_18131	chr5	159106554	159106967	-2.01248	1.76618	-	-	LINC02202	No	NA
Peak_969	chr5	160417809	160420285	0.603942	2.22755	-	-	SLU7	No	NA
Peak_6835	chr5	160467892	160472104	-0.848776	3.78785	-	-	MIR3142HG	No	NA
Peak_22393	chr5	163508873	163509742	0.890591	2.82961	-	-	MAT2B	No	No
Peak_10683	chr5	166983159	166984112	-	-	-2.48087	2.19357	LINC01947	No	NA
Peak_9747	chr5	169636621	169638342	-	-	0.790717	1.6762	DOCK2	Yes	Yes
Peak_41065	chr5	169648684	169649108	0.991186	1.98788	1.14336	2.26671	DOCK2	Yes	Yes
Peak_40453	chr5	169650878	169651538	-	-	0.857589	1.96955	DOCK2	Yes	Yes
Peak_21631	chr5	170278832	170279447	-1.25741	1.33362	-	-	LCP2	Yes	Yes
Peak_20170	chr5	170389043	170389715	-	-	0.986112	1.38641	KCNIP1-OT1	No	NA
Peak_18094	chr5	172174937	172176023	-1.80871	3.64712	-1.86224	4.21668	STK10	No	Yes
Peak_25061	chr5	172185566	172186002	0.709301	1.53922	0.783187	1.70385	STK10	No	Yes
Peak_26321	chr5	172701493	172701939	-1.56863	2.04301	-1.65997	2.93648	LOC107986479	No	NA
Peak_1126	chr5	172768356	172771257	-	-	0.852401	1.77992	DUSP1	Yes	Yes
Peak_26653	chr5	173327142	173327741	-1.67912	1.34942	-	-	STC2	No	Yes
Peak_6289	chr5	173917676	173919028	-0.939019	2.24366	-1.3194	4.52765	CPEB4	No	No
Peak_12238	chr5	176364920	176366565	-	-	0.503552	1.36289	ARL10	No	Yes
Peak_51282	chr5	176531252	176531520	-	-	0.747273	1.52673	RNF44	No	Yes
Peak_10476	chr5	176542340	176544356	-1.05476	2.02572	-	-	CDHR2	No	NA
Peak_24940	chr5	177132846	177133515	-	-	2.49332	2.71864	NSD1	Yes	Yes
Peak_5285	chr5	177302725	177304940	-	-	0.690761	2.34071	PRELID1	No	Yes
Peak_11737	chr5	177426708	177428795	-0.635593	1.34149	-	-	GRK6	Yes	No
Peak_7942	chr5	177453875	177456460	-	-	-1.03299	1.95621	DBN1	Yes	No
Peak_7790	chr5	177552999	177554480	-	-	0.728179	1.52645	FAM193B	No	No
Peak_18122	chr5	178627258	178627678	0.835458	1.34268	-	-	CLK4	No	Yes
Peak_31602	chr5	180085166	180085584	-1.3095	1.56718	-	-	RNF130	No	Yes
Peak_14034	chr5	181187418	181188171	-	-	0.828772	1.42725	LINC01962	No	NA
Peak_3658	chr5	181245316	181247470	0.532803	1.53705	0.602108	1.87867	CTC-338M12.4	No	Yes
Peak_36097	chr6	298624	298853	-1.27401	2.53366	-1.23082	3.14073	DUSP22	No	No
Peak_18897	chr6	1604273	1605489	-1.83847	3.05605	-	-	FOXCUT	No	NA
Peak_14102	chr6	1624369	1625623	-1.31687	1.88996	-	-	GMDS	Yes	No
Peak_4182	chr6	2765445	2769462	-0.686621	3.1145	-1.28734	6.35673	WRNIP1	No	NA
Peak_13904	chr6	2769505	2770740	-	-	-0.791652	1.51067	WRNIP1	No	NA
Peak_40216	chr6	2820022	2820456	-1.26703	1.83238	-1.54425	3.49032	SERPINB1	No	Yes
Peak_44117	chr6	2835689	2835990	0.90359	2.14455	0.99328	2.43068	SERPINB1	No	Yes
Peak_2480	chr6	2838189	2842598	-0.921557	6.19609	-0.70774	3.25589	SERPINB1	No	Yes
Peak_23960	chr6	2876236	2876755	-	-	1.36485	2.20796	SERPINB9P1	No	Yes
Peak_14178	chr6	3022950	3024500	-	-	-0.841003	2.7147	LOC101927759	No	NA
Peak_20596	chr6	3053850	3054252	-	-	1.38	1.61265	RIPK1	Yes	No
Peak_30218	chr6	3229731	3229991	-1.66723	1.85925	-1.18638	1.5467	LOC100422781	No	NA
Peak_16274	chr6	3355498	3356031	0.950762	1.64143	1.26692	2.98577	SLC22A23	No	No
Peak_25370	chr6	3742787	3743282	1.02722	1.44894	1.2537	1.98659	PXDC1	No	No
Peak_6662	chr6	4777148	4778172	-	-	-0.808094	1.68111	CDYL	No	Yes
Peak_14040	chr6	5084189	5086012	-0.926203	1.68271	-	-	PPP1R3G	No	NA
Peak_20844	chr6	5850762	5851698	-1.56136	1.98484	-	-	NRN1	No	No
Peak_20092	chr6	6687290	6687673	1.29893	3.40377	1.12878	2.42964	LOC101928047	No	NA
Peak_25836	chr6	6724358	6725156	-	-	0.803838	1.7417	LOC101928047	No	NA
Peak_39086	chr6	6943037	6943192	-2.1753	1.67417	-	-	LOC105374904	No	NA
Peak_10789	chr6	7052487	7053342	-	-	-0.782835	1.94592	RREB1	No	Yes
Peak_3160	chr6	7106577	7109986	-1.05616	2.80626	-1.08491	3.26647	RREB1	No	Yes
Peak_36239	chr6	7112453	7112999	-	-	-1.05623	1.40967	RREB1	No	Yes
Peak_19728	chr6	7141271	7141796	1.10497	1.87265	1.14707	2.60473	RREB1	No	Yes
Peak_23143	chr6	7145589	7146932	-0.724937	2.45338	-0.888909	2.77848	RREB1	No	Yes
Peak_2129	chr6	8434609	8436100	-	-	0.633478	1.33812	LOC100506207	No	NA
Peak_27351	chr6	8731855	8732328	-	-	-1.75103	1.4422	LOC100506207	No	NA
Peak_14632	chr6	8743152	8743759	-	-	-1.55685	1.56555	LOC100506207	No	NA
Peak_25421	chr6	10147178	10147595	-	-	-1.86224	1.96371	OFCC1	No	NA
Peak_18894	chr6	10416873	10417373	-1.77667	1.31528	-	-	TFAP2A	No	Yes
Peak_19113	chr6	12483609	12484075	-1.30934	2.19508	-1.68023	3.39383	LINC02530	No	NA
Peak_10375	chr6	13013002	13014629	-	-	0.800755	2.01533	PHACTR1	Yes	NA
Peak_7833	chr6	13272624	13275798	0.567958	2.05358	0.530318	1.72862	TBC1D7-LOC100130357	No	NA
Peak_28249	chr6	13395620	13395914	-	-	0.799824	1.49643	GFOD1	No	No
Peak_28810	chr6	13484662	13484944	-	-	1.06574	2.11838	GFOD1	No	No
Peak_8549	chr6	13484993	13487675	-	-	0.955542	1.97441	GFOD1-AS1	No	No
Peak_11434	chr6	14211293	14212000	-	-	1.30204	4.13825	LINC01108	No	No
Peak_30209	chr6	14857451	14857707	-	-	1.1749	2.24663	LOC105374945	No	NA
Peak_24158	chr6	15017226	15017674	-	-	1.0413	1.7847	LOC105374945	No	NA
Peak_15593	chr6	15244157	15245191	0.543476	1.34336	0.579524	1.63411	JARID2	Yes	Yes
Peak_10788	chr6	15248873	15250200	-	-	-0.808134	1.37824	JARID2	Yes	Yes
Peak_35593	chr6	15250290	15250453	-0.945718	1.56745	-0.94592	1.72862	JARID2	Yes	Yes
Peak_28650	chr6	15308187	15308580	-	-	-1.51268	1.956	JARID2	Yes	Yes
Peak_31833	chr6	15398492	15399140	-0.830816	1.43377	-0.784154	1.63109	JARID2	Yes	Yes
Peak_30951	chr6	15403886	15404487	-1.01704	2.14455	-1.06867	2.18112	JARID2	Yes	Yes
Peak_27447	chr6	16236904	16237398	-	-	-0.911356	1.5375	GMPR	No	Yes
Peak_5816	chr6	16238083	16240054	-1.00673	1.46298	-	-	GMPR	No	Yes
Peak_12636	chr6	16699871	16701330	-	-	-0.643519	1.77174	ATXN1	Yes	Yes
Peak_25382	chr6	16704217	16704802	-0.818683	1.85604	-	-	ATXN1	Yes	Yes
Peak_16373	chr6	16712097	16713620	-0.738193	2.20468	-0.764009	2.46764	ATXN1	Yes	Yes
Peak_40336	chr6	17869466	17869925	-0.960268	1.96415	-	-	KIF13A	Yes	NA
Peak_25503	chr6	17962387	17962707	-0.920693	1.64118	-0.717666	1.3348	KIF13A	Yes	NA
Peak_22425	chr6	17984432	17985576	-	-	0.884381	1.55129	KIF13A	Yes	NA
Peak_21994	chr6	19837847	19838844	-1.88276	1.41351	-	-	LOC105374959	No	NA
Peak_21339	chr6	20564615	20564995	-1.88128	1.42614	-3.78641	4.37492	CDKAL1	No	No
Peak_531	chr6	21593234	21599438	-	-	-0.991465	2.29459	LOC107986579	No	NA
Peak_6347	chr6	21664205	21667893	-0.94158	2.00305	-	-	CASC15	No	No
Peak_23991	chr6	22929189	22929485	-1.1978	1.37009	-1.34309	2.25473	LOC102724736	No	NA
Peak_8787	chr6	24721321	24722207	-	-	1.00964	1.7303	LINC02828	No	NA
Peak_108	chr6	24774311	24776797	0.858158	2.78964	0.698949	2.29941	GMNN	Yes	Yes
Peak_36235	chr6	24909418	24909751	-	-	0.769277	2.03484	RIPOR2	No	NA
Peak_14169	chr6	24910095	24911996	-	-	1.10855	4.56132	RIPOR2	No	NA
Peak_40887	chr6	24951210	24951607	0.744048	1.54255	-	-	RIPOR2	No	NA
Peak_29263	chr6	24952006	24952587	1.16426	2.06073	-	-	RIPOR2	No	NA
Peak_8291	chr6	25135647	25139459	-	-	-0.466108	1.39903	CMAHP	No	Yes
Peak_27981	chr6	25164760	25165058	-	-	1.0358	1.75846	CMAHP	No	Yes
Peak_7584	chr6	25991712	25993353	-	-	-1.06277	1.40351	H1-1	No	NA
Peak_6525	chr6	26043870	26046386	0.963112	1.79395	-	-	H3C3	No	NA
Peak_3578	chr6	26155330	26160597	-0.589356	1.59796	-	-	H1-4	No	NA
Peak_9217	chr6	26240009	26241551	0.732317	1.68388	0.687098	1.32919	H4C6	No	NA
Peak_8282	chr6	26321644	26322797	-	-	-1.90735	3.26614	LOC101928743	No	NA
Peak_1028	chr6	26401790	26403490	0.656108	1.81687	-	-	BTN3A1	No	Yes
Peak_21654	chr6	26441469	26442276	-	-	-0.810355	1.35162	BTN3A3	No	Yes
Peak_18035	chr6	26520438	26520769	-	-	1.01603	1.89846	HCG11	No	No
Peak_19423	chr6	26613754	26614769	-1.59465	1.68972	-	-	LOC105374989	No	NA
Peak_26342	chr6	26957413	26957666	-	-	1.38813	1.3336	LINC00240	No	No
Peak_10684	chr6	27138908	27140501	-1.12429	1.77657	-	-	H4C9	No	NA
Peak_1262	chr6	27144486	27146924	-	-	-0.870124	1.36289	H2BC12	No	NA
Peak_11239	chr6	27312096	27313046	-1.80444	1.37047	-	-	POM121L2	No	NA
Peak_4957	chr6	27502210	27503750	-1.50661	2.20468	-1.58626	2.60985	LOC105375001	No	NA
Peak_4078	chr6	27693544	27695030	0.989389	1.73306	-	-	LINC01012	No	No
Peak_3919	chr6	27808448	27811756	-0.866943	1.61644	-	-	H3C10	No	NA
Peak_10385	chr6	27814628	27815937	0.619679	1.57432	0.818677	1.99629	H2AC14	No	NA
Peak_7827	chr6	27824358	27825671	-	-	-1.05266	1.65325	H4C11	No	NA
Peak_18104	chr6	27890163	27891830	0.984201	4.47182	0.896352	2.93246	H3C12	No	NA
Peak_27001	chr6	28215531	28215825	-	-	1.14084	1.95645	TOB2P1	No	Yes
Peak_1447	chr6	28398938	28400556	-0.840398	1.49393	-	-	ZSCAN12	No	Yes
Peak_18416	chr6	33508907	33509579	0.820749	1.4972	1.13805	3.01158	GGNBP1	No	No
Peak_17588	chr6	33592901	33593733	-1.0104	1.54426	-	-	LINC00336	No	NA
Peak_21999	chr6	33633147	33633656	-1.05599	1.40504	-	-	ITPR3	Yes	Yes
Peak_7019	chr6	33710688	33712131	0.610469	1.40665	-	-	UQCC2	No	Yes
Peak_17589	chr6	34235638	34236766	-1.45647	2.24532	-	-	HMGA1	Yes	Yes
Peak_179	chr6	34886912	34891062	-0.685288	1.98976	-1.00831	4.4892	ANKS1A	Yes	No
Peak_32277	chr6	35311396	35311735	-	-	-1.47197	1.61495	DEF6	Yes	No
Peak_19202	chr6	35727476	35728090	1.84864	1.89769	2.81535	5.31056	FKBP5	Yes	NA
Peak_14813	chr6	36024097	36024920	-	-	0.765946	2.16666	SLC26A8	No	Yes
Peak_22913	chr6	36032326	36032847	-2.42735	2.77159	-2.5556	3.67698	MAPK14	Yes	Yes
Peak_22244	chr6	36038359	36038828	-1.15932	1.34736	-1.04178	1.37132	MAPK14	Yes	Yes
Peak_39082	chr6	36197709	36198034	0.966986	1.51071	-	-	BRPF3	No	No
Peak_24085	chr6	37177482	37177881	-1.05437	1.50316	-	-	PIM1	Yes	Yes
Peak_50353	chr6	38443504	38443665	-1.49086	1.89209	-2.05303	3.88661	BTBD9-AS1	No	No
Peak_10478	chr6	38702268	38703170	0.678318	1.34488	0.841521	2.12558	GLO1	Yes	Yes
Peak_16904	chr6	39227432	39229950	0.706834	1.86841	0.893684	1.737	KCNK5	Yes	Yes
Peak_24457	chr6	40719800	40720103	-1.67169	1.45265	-	-	LOC101929535	No	NA
Peak_19428	chr6	41545560	41546240	-1.54177	1.95022	-	-	FOXP4-AS1	No	Yes
Peak_9901	chr6	41560223	41561572	-0.735561	2.06076	-	-	FOXP4	No	No
Peak_22329	chr6	41938421	41939648	-0.702963	1.817	-1.0759	3.44073	CCND3	Yes	No
Peak_513	chr6	42563554	42566361	-	-	-0.674887	1.56216	UBR2	Yes	NA
Peak_14777	chr6	42960122	42961276	-	-	1.0222	2.31149	GNMT	No	Yes
Peak_6637	chr6	43052909	43054384	-	-	0.587437	1.31124	CUL7	No	Yes
Peak_8624	chr6	43170233	43171271	-	-	1.16601	2.37343	SRF	No	Yes
Peak_20598	chr6	43174415	43174656	-	-	1.9468	1.53432	SRF	No	Yes
Peak_18418	chr6	43510075	43510715	-	-	1.14501	2.65293	LRRC73	No	Yes
Peak_5286	chr6	43629234	43630533	-	-	0.816337	1.48562	GTPBP2	No	Yes
Peak_18064	chr6	43645473	43645961	-	-	1.03524	1.54527	RSPH9	No	No
Peak_2276	chr6	43686740	43688523	-	-	-0.763339	1.77788	MRPS18A	No	Yes
Peak_37306	chr6	43772119	43772490	-	-	1.14364	2.37194	VEGFA	Yes	Yes
Peak_12063	chr6	44237445	44238321	-	-	1.12835	1.66506	SLC29A1	No	Yes
Peak_5379	chr6	44262784	44265628	-1.03677	2.52369	-	-	NFKBIE	No	No
Peak_4663	chr6	44386752	44389314	0.548142	1.87405	-	-	CDC5L	No	No
Peak_18985	chr6	45323409	45324210	-	-	-1.47492	2.39226	RUNX2	Yes	Yes
Peak_5628	chr6	45419179	45422734	-1.1375	1.55222	-1.31355	2.3163	RUNX2	Yes	Yes
Peak_4038	chr6	45422789	45425675	-0.896493	1.68134	-1.1894	2.75306	RUNX2	Yes	Yes
Peak_28498	chr6	52377740	52378009	-	-	-1.8753	2.17122	PAQR8	No	NA
Peak_8630	chr6	52575756	52577054	0.453853	1.37392	0.597987	2.09261	TRAM2-AS1	No	NA
Peak_8901	chr6	52577176	52578093	-1.78815	2.35944	-1.12105	1.51067	TRAM2-AS1	No	NA
Peak_4798	chr6	53346647	53349875	-	-	-0.912954	2.23132	ELOVL5	Yes	Yes
Peak_11582	chr6	53359473	53360131	-	-	1.88362	1.82544	ELOVL5	Yes	Yes
Peak_6660	chr6	56842619	56843698	-1.29842	1.97299	-0.84467	1.35976	DST	Yes	No
Peak_4315	chr6	57221106	57223332	-	-	-0.882431	1.48679	RAB23	No	Yes
Peak_8859	chr6	63571742	63574736	-	-	0.781944	1.93549	PTP4A1	Yes	Yes
Peak_1607	chr6	63635050	63638007	-	-	-0.938855	1.4886	PHF3	Yes	No
Peak_6284	chr6	68633872	68635012	-1.67279	1.43866	-	-	ADGRB3-DT	No	NA
Peak_712	chr6	70412445	70414912	-0.807577	1.73572	-0.870525	2.36335	FAM135A-AS1	No	NA
Peak_10715	chr6	71287903	71290375	-	-	-0.738036	2.45677	OGFRL1	No	Yes
Peak_9720	chr6	71419694	71421433	-	-	1.29812	2.19869	LINC00472	No	NA
Peak_20906	chr6	73180827	73181229	-	-	1.75215	1.42554	KCNQ5-AS1	No	Yes
Peak_3345	chr6	73652525	73655374	-	-	-1.63792	4.20071	SLC17A5	No	NA
Peak_4557	chr6	73695108	73698156	-0.897277	2.71316	-	-	CD109-AS1	No	NA
Peak_20719	chr6	75935085	75935693	-1.7759	1.69712	-	-	IMPG1	No	No
Peak_10687	chr6	77367945	77369378	-2.89983	2.49593	-1.56162	1.30374	HTR1B	No	NA
Peak_4558	chr6	81749645	81754247	-	-	-1.20214	2.59176	LOC105377871	No	NA
Peak_28901	chr6	81766606	81767135	-	-	-2.28168	2.04715	TENT5A	No	NA
Peak_18567	chr6	81808776	81809718	-	-	-1.16002	1.67224	LINC01526	No	NA
Peak_5068	chr6	83064830	83065924	-	-	-1.24274	2.22496	UBE3D	No	No
Peak_27133	chr6	83511993	83512391	-	-	-1.79828	1.3075	PRSS35	No	NA
Peak_495	chr6	83858820	83861343	-	-	-1.29852	4.45587	CYB5R4	No	No
Peak_67	chr6	84226665	84228363	0.826353	1.49579	-	-	CEP162	No	No
Peak_22426	chr6	87645074	87645690	-1.13205	1.38746	-1.00898	1.33803	ORC3	No	Yes
Peak_24377	chr6	89073019	89073468	-	-	-1.3483	1.47658	PNRC1	No	Yes
Peak_730	chr6	89081724	89084317	-	-	0.884322	1.95508	PNRC1	No	Yes
Peak_9526	chr6	89116944	89118477	-1.18284	2.22095	-	-	SRSF12	No	Yes
Peak_6705	chr6	89145360	89147693	-0.672298	1.5178	-0.845017	2.45677	LOC101929004	No	NA
Peak_13284	chr6	89356742	89358127	-	-	-0.86294	1.47782	UBE2J1	No	Yes
Peak_9508	chr6	89410559	89413743	-	-	-0.881304	3.74084	RRAGD	No	Yes
Peak_12418	chr6	89433102	89434224	-0.924575	1.64563	-	-	ANKRD6	No	Yes
Peak_15968	chr6	90284092	90286070	-0.873934	1.95274	-1.06601	2.71757	LOC105377891	No	NA
Peak_11078	chr6	90610095	90611766	-1.35731	1.31127	-	-	MAP3K7	Yes	Yes
Peak_1716	chr6	95576120	95577456	-	-	-2.21885	1.53723	MANEA-DT	No	NA
Peak_4573	chr6	96924578	96925587	-	-	-1.71795	3.0651	KLHL32	Yes	Yes
Peak_27993	chr6	99603541	99603971	-1.99057	1.86887	-	-	PRDM13	No	NA
Peak_13086	chr6	100228519	100229484	-0.964014	1.89316	-1.21474	3.16025	SIM1	No	NA
Peak_25784	chr6	105880014	105880636	-	-	-2.09374	2.29885	LOC105377923	No	NA
Peak_10171	chr6	106509604	106514275	-1.08367	2.63534	-0.848556	1.69283	CRYBG1	No	NA
Peak_31747	chr6	106519219	106519597	-	-	-1.43103	2.39774	CRYBG1	No	NA
Peak_751	chr6	108294167	108295954	0.581632	1.80075	-	-	AFG1L	No	NA
Peak_18407	chr6	108560845	108561387	-	-	3.40188	1.89436	FOXO3	Yes	Yes
Peak_9014	chr6	108561449	108563567	-	-	0.744203	3.21252	FOXO3	Yes	Yes
Peak_28469	chr6	108798253	108798770	-0.850255	1.35482	-	-	LINC00222	No	No
Peak_2151	chr6	109007489	109010549	-	-	-1.09234	4.31568	SESN1	No	Yes
Peak_452	chr6	109091859	109096687	-0.79508	1.73431	-1.18242	3.76319	SESN1	No	Yes
Peak_35398	chr6	109304299	109304523	-	-	-1.7681	1.67494	CCDC162P	No	NA
Peak_609	chr6	109375564	109384080	-	-	-0.643028	2.83421	CD164	No	No
Peak_14341	chr6	109515691	109516372	-	-	-1.0348	1.517	AK9	No	Yes
Peak_1004	chr6	109690048	109692003	-	-	-1.16763	1.45366	AK9	No	Yes
Peak_6688	chr6	110039536	110040486	-1.25685	1.67818	-1.22124	2.18081	LOC107986631	No	NA
Peak_23313	chr6	110399654	110400298	-	-	1.5364	3.35815	DDO	No	No
Peak_2584	chr6	110813512	110816594	-	-	-0.71113	1.55966	CDK19	No	No
Peak_2491	chr6	110873457	110880494	-0.63706	3.66974	-0.874353	7.08929	AMD1	Yes	No
Peak_5136	chr6	110981091	110983272	-	-	-0.826019	1.45366	RPF2	No	Yes
Peak_29204	chr6	111760117	111760463	-	-	0.834607	1.56555	FYN	Yes	Yes
Peak_13858	chr6	112253596	112254796	-	-	1.511	2.74573	LAMA4	No	NA
Peak_22231	chr6	112880083	112880435	-	-	1.0205	1.32465	LOC107986636	No	NA
Peak_19739	chr6	113872983	113873650	-	-	-1.04834	1.34293	MROCKI	No	NA
Peak_8698	chr6	116369872	116372067	-0.80068	1.34149	-	-	DSE	Yes	Yes
Peak_2232	chr6	116667457	116668900	-	-	-1.3718	1.627	ZUP1	No	NA
Peak_5965	chr6	116680530	116681088	-	-	-0.719422	1.45428	KPNA5	No	Yes
Peak_2585	chr6	116681135	116683124	-0.564135	1.4266	-1.46629	7.39839	KPNA5	No	Yes
Peak_26597	chr6	118187156	118187765	-	-	-1.64689	1.32552	SLC35F1	No	No
Peak_7532	chr6	118649938	118651652	-	-	-1.02669	1.70496	CEP85L	No	No
Peak_22325	chr6	118864212	118865295	-	-	-0.7176	2.0202	ASF1A	No	No
Peak_2008	chr6	123802282	123807302	-	-	-0.882603	1.56589	NKAIN2	No	NA
Peak_25320	chr6	125811070	125811402	-	-	-1.00352	1.35021	NCOA7	No	Yes
Peak_5010	chr6	125956106	125958734	-	-	-0.694424	2.23035	HINT3	No	No
Peak_23541	chr6	126171027	126171496	-	-	-1.89575	1.49386	LOC101928096	No	NA
Peak_19563	chr6	129490618	129491120	-1.55444	1.48082	-1.38668	1.67658	LAMA2	Yes	Yes
Peak_8125	chr6	130365002	130367557	-1.08963	1.81197	-	-	TMEM200A	No	NA
Peak_5089	chr6	131134669	131136704	-	-	-0.62894	1.49863	AKAP7	No	No
Peak_26890	chr6	131199999	131200203	-1.59986	1.49285	-	-	AKAP7	No	No
Peak_25823	chr6	132131046	132131380	-	-	-1.49278	1.88816	LINC01013	No	NA
Peak_20089	chr6	132713665	132714375	1.3999	2.15883	-	-	VNN1	Yes	No
Peak_5353	chr6	133951288	133954232	-	-	-0.739127	1.32377	TBPL1	No	Yes
Peak_2192	chr6	135179926	135184882	-1.19174	1.9957	-1.63311	4.34951	MYB	Yes	No
Peak_15657	chr6	135184958	135186476	0.786274	1.78011	1.06359	3.52999	MYB	Yes	No
Peak_19515	chr6	135880145	135881009	-0.864228	1.63343	-1.50642	5.20831	LOC101928373	No	NA
Peak_15463	chr6	136783712	136785995	-0.568235	1.90267	-0.798813	2.69394	LOC101928429	No	NA
Peak_5836	chr6	136821798	136823491	-	-	0.533929	1.35298	PEX7	No	Yes
Peak_20210	chr6	136889857	136890159	-	-	-1.47232	2.0147	SLC35D3	No	NA
Peak_18895	chr6	136920744	136922824	-1.15085	1.91098	-	-	SLC35D3	No	NA
Peak_28893	chr6	137870608	137871040	-	-	1.02899	1.6775	TNFAIP3	Yes	Yes
Peak_30949	chr6	138455728	138456074	-1.30587	2.56051	-	-	MIR3145	No	NA
Peak_3775	chr6	139027446	139030853	-	-	-0.683421	2.17457	ABRACL	No	Yes
Peak_24038	chr6	139131761	139132149	-	-	-1.48669	2.6181	HECA	No	Yes
Peak_23222	chr6	139290608	139291275	-	-	-1.43883	1.44272	TXLNB	No	No
Peak_34829	chr6	140897886	140898161	-1.80363	1.39152	-	-	LOC102723724	No	NA
Peak_60979	chr6	141254177	141254560	-1.33745	1.71366	-1.05118	1.3336	LOC105378029	No	NA
Peak_18062	chr6	141483375	141484295	-1.45238	1.69639	-	-	LOC105378029	No	NA
Peak_28158	chr6	142029998	142030678	-2.07379	2.19242	-	-	GJE1	No	NA
Peak_14675	chr6	142381482	142384167	-0.949382	1.30195	-1.22415	2.72093	ADGRG6	No	NA
Peak_24083	chr6	142384501	142384884	-	-	-1.74845	2.5436	ADGRG6	No	NA
Peak_20090	chr6	142902675	142902937	-1.66892	1.59436	-2.30282	2.95792	HIVEP2	No	Yes
Peak_3276	chr6	142943687	142948354	-	-	-1.14729	2.84729	HIVEP2-DT	No	NA
Peak_24157	chr6	143554874	143555457	-	-	-1.31098	1.91509	PHACTR2-AS1	No	NA
Peak_6286	chr6	144149767	144152057	-	-	0.580731	1.8009	STX11	Yes	Yes
Peak_10516	chr6	144215575	144217287	0.611869	1.37181	-	-	STX11	Yes	Yes
Peak_14633	chr6	144334397	144334874	-	-	-1.04575	2.68577	UTRN	No	Yes
Peak_18539	chr6	144582991	144583731	-1.61193	4.86118	-1.68061	4.36996	UTRN	No	Yes
Peak_7946	chr6	145734266	145737133	-	-	-0.617002	1.76553	EPM2A	Yes	Yes
Peak_12460	chr6	146544793	146546322	-	-	-1.108	1.98879	RAB32	No	Yes
Peak_13430	chr6	146598728	146599506	-	-	0.787011	1.50347	ADGB-DT	No	NA
Peak_33589	chr6	148557653	148558104	-1.74469	2.42063	-2.8165	5.39391	SASH1	No	Yes
Peak_2596	chr6	149317857	149321796	-0.594869	2.31196	-	-	TAB2	Yes	No
Peak_4521	chr6	149749342	149750975	0.920898	1.89316	0.870273	1.67763	NUP43	No	Yes
Peak_14290	chr6	149922466	149923646	-1.22598	1.39305	-	-	RAET1G	No	No
Peak_23841	chr6	151681645	151682066	-0.928326	1.44982	-1.65281	3.37834	ESR1	Yes	NA
Peak_13943	chr6	151690358	151691832	-0.993333	2.27923	-1.32368	3.34465	ESR1	Yes	NA
Peak_19581	chr6	151764405	151764971	-	-	-1.03702	1.54527	ESR1	Yes	NA
Peak_21574	chr6	151808412	151808837	-1.48389	1.30697	-	-	ESR1	Yes	NA
Peak_15967	chr6	152462574	152463302	-	-	-1.57639	3.4141	SYNE1	Yes	Yes
Peak_33418	chr6	152485832	152486098	-	-	-1.05855	1.68259	SYNE1	Yes	Yes
Peak_31749	chr6	152704989	152705580	-	-	-1.30663	1.75904	MYCT1	No	NA
Peak_24476	chr6	152974591	152975683	0.747643	1.90394	-	-	FBXO5	Yes	Yes
Peak_2371	chr6	153001235	153004007	-	-	-0.610748	1.30297	MTRF1L	No	Yes
Peak_22560	chr6	154508560	154509256	1.04805	2.75182	1.15584	3.69163	CNKSR3	No	Yes
Peak_40612	chr6	156013422	156013817	-1.67435	1.52181	-	-	MIR1202	No	NA
Peak_24275	chr6	156634929	156635405	-0.734868	1.34149	-	-	LOC105378073	No	NA
Peak_3828	chr6	156777853	156783214	-	-	-1.38855	3.46124	MIR4466	No	NA
Peak_6634	chr6	157020250	157022153	-	-	-1.17411	1.60524	ARID1B	Yes	Yes
Peak_11506	chr6	157273787	157275561	-0.950735	2.77356	-0.54819	1.30672	TMEM242	No	No
Peak_26556	chr6	158026043	158026799	-	-	-0.745932	1.43039	SYNJ2	Yes	No
Peak_7850	chr6	158559448	158561890	-	-	0.490995	1.78594	TMEM181	No	No
Peak_53233	chr6	158686359	158686959	-1.32012	1.32897	-	-	SYTL3	No	Yes
Peak_25785	chr6	159168730	159169170	-	-	1.78457	1.97208	FNDC1	Yes	Yes
Peak_31860	chr6	159983199	159983577	-	-	-1.52517	1.55788	IGF2R	Yes	Yes
Peak_20887	chr6	161235949	161236359	-0.77293	1.30399	-	-	AGPAT4	No	No
Peak_20145	chr6	162706165	162706749	-	-	-1.37447	1.33412	PACRG	No	NA
Peak_13301	chr6	162726691	162728528	-	-	-0.971435	2.74025	PACRG	No	NA
Peak_35694	chr6	164396608	164396968	-1.59058	1.64563	-1.8155	2.40227	MEAT6	No	NA
Peak_22457	chr6	165634005	165634665	-1.67778	2.10729	-1.71877	2.32725	PDE10A	No	NA
Peak_35597	chr6	166439929	166440438	-1.52049	2.46827	-1.23531	1.7325	RPS6KA2	No	Yes
Peak_21554	chr6	166657137	166657994	-	-	-1.05483	2.18461	RPS6KA2	No	Yes
Peak_9506	chr6	166955411	166957434	-1.17893	2.10004	-1.02617	1.8964	RNASET2	No	NA
Peak_24095	chr6	167047669	167048152	-1.16196	1.39516	-	-	CEP43	No	NA
Peak_22385	chr6	167699132	167700012	-0.977335	1.71366	-	-	LINC02487	No	NA
Peak_26716	chr6	167833269	167833518	-1.83638	1.34795	-2.80897	2.9828	AFDN	Yes	NA
Peak_21486	chr7	366041	366677	-	-	-1.19436	1.75007	LOC442497	No	NA
Peak_30256	chr7	815703	816162	-1.94929	2.61062	-1.51123	1.58055	SUN1	No	Yes
Peak_22024	chr7	953660	954116	-	-	1.23696	2.51875	ADAP1	No	Yes
Peak_17592	chr7	1043641	1044469	-	-	1.11406	2.98577	GPR146	No	Yes
Peak_17593	chr7	1055059	1056619	-0.755386	1.43347	-	-	GPR146	No	Yes
Peak_20191	chr7	1506716	1507188	-1.81167	1.73512	-1.57417	1.65697	INTS1	No	NA
Peak_18913	chr7	2037829	2038478	-	-	-0.583007	1.40351	MAD1L1	Yes	NA
Peak_13204	chr7	2313680	2314450	-	-	0.952737	1.46696	SNX8	No	Yes
Peak_17218	chr7	2406521	2406968	-2.59327	4.654	-2.50182	6.06898	CHST12	No	Yes
Peak_28652	chr7	2738373	2738625	-1.3387	1.32926	-	-	GNA12	Yes	No
Peak_31220	chr7	2757432	2757721	-0.7673	1.33213	-	-	GNA12	Yes	No
Peak_19978	chr7	4144502	4145349	-1.69745	1.37417	-	-	LOC105375131	No	NA
Peak_12632	chr7	4724602	4726054	0.962863	2.55537	1.43243	4.67635	FOXK1	No	Yes
Peak_23861	chr7	4809115	4809573	-1.59789	1.4192	-	-	RADIL	Yes	Yes
Peak_24976	chr7	5296975	5297309	-1.45161	1.30477	-	-	SLC29A4	No	NA
Peak_12468	chr7	5396343	5397270	-	-	-0.847595	2.14371	TNRC18	Yes	Yes
Peak_2108	chr7	5417324	5423870	-0.694903	2.93373	-	-	TNRC18	Yes	Yes
Peak_2376	chr7	5424220	5431006	-0.97082	2.87511	-0.784694	2.27257	LOC100129484	No	NA
Peak_23435	chr7	6228514	6228845	-2.45007	2.7981	-2.1882	3.08829	CYTH3	No	No
Peak_8103	chr7	6728892	6730716	-0.763713	1.53827	-	-	PMS2CL	No	No
Peak_8322	chr7	7761487	7762975	-	-	-1.79438	5.39391	UMAD1	No	Yes
Peak_32055	chr7	7867900	7868382	-1.4936	1.85784	-1.82547	3.53375	GLCCI1-DT	No	NA
Peak_3221	chr7	7967433	7971402	-	-	-0.782139	1.90268	GLCCI1-DT	No	NA
Peak_25453	chr7	7989503	7990266	-0.998966	1.78787	-1.40283	3.45605	GLCCI1	No	NA
Peak_4095	chr7	8260564	8262857	-	-	-0.633737	1.51912	ICA1-AS1	No	NA
Peak_35617	chr7	9938212	9938704	-	-	-1.5983	1.30125	LOC105375146	No	NA
Peak_7586	chr7	11830607	11832645	-	-	-1.01033	1.72542	THSD7A	No	No
Peak_19716	chr7	16563202	16563667	-1.12059	1.97831	-1.6477	5.04043	SOSTDC1	No	Yes
Peak_1862	chr7	16644127	16647972	-0.548903	1.35161	-0.492955	1.4062	BZW2	No	Yes
Peak_4771	chr7	16753242	16755385	-	-	-0.709905	1.51724	TSPAN13	No	Yes
Peak_15377	chr7	17401557	17402003	-	-	-1.30652	1.37132	LINC02888	No	NA
Peak_12866	chr7	18289899	18291582	-1.31599	1.89509	-1.40215	2.79042	LOC107986698	No	NA
Peak_31865	chr7	20164540	20164745	-	-	-2.25117	1.45671	MACC1	No	No
Peak_31400	chr7	22147161	22147503	-	-	-1.03632	1.72542	RAPGEF5	No	No
Peak_18079	chr7	22727024	22727606	-	-	-1.24023	1.3046	IL6	Yes	Yes
Peak_16690	chr7	22853710	22854020	-0.907205	1.34014	-	-	SNHG26	No	NA
Peak_7139	chr7	22854140	22855666	-	-	-0.857315	2.78175	SNHG26	No	NA
Peak_16599	chr7	23345698	23347945	-0.591683	1.73572	-0.551982	1.7303	IGF2BP3	Yes	Yes
Peak_11773	chr7	24653236	24654043	-	-	-2.01835	2.57541	PALS2	No	NA
Peak_1373	chr7	25123803	25126141	-	-	-0.538662	1.30835	CYCS	Yes	Yes
Peak_15908	chr7	25496466	25496962	-	-	1.06684	1.91715	LOC646588	No	NA
Peak_48391	chr7	25895129	25895484	-1.73027	2.3992	-2.23145	4.4892	MIR148A	No	NA
Peak_18959	chr7	25951501	25952152	1.19922	2.38754	1.08023	1.93393	MIR148A	No	NA
Peak_16847	chr7	26101003	26102095	-1.35652	1.54326	-1.6882	3.11294	NFE2L3	No	No
Peak_9249	chr7	26151495	26154574	-0.512627	1.81197	-	-	NFE2L3	No	No
Peak_21685	chr7	26155957	26156305	-1.0148	1.81614	-	-	NFE2L3	No	No
Peak_180	chr7	26196809	26204890	-0.445233	1.35415	-0.826182	3.50317	CBX3	No	Yes
Peak_27080	chr7	26279364	26279533	-	-	-0.939074	1.33812	SNX10	No	No
Peak_20341	chr7	26369757	26370523	-	-	-1.66738	3.07157	SNX10	No	No
Peak_5371	chr7	26374003	26377548	-	-	-0.705393	1.62542	SNX10-AS1	No	NA
Peak_37948	chr7	26685383	26685658	-	-	-1.12855	1.8408	LINC02860	No	NA
Peak_18182	chr7	26856036	26856863	-	-	-1.61829	1.91509	SKAP2	No	NA
Peak_3608	chr7	26863550	26865457	-	-	-1.39301	1.60148	SKAP2	No	NA
Peak_25082	chr7	27130348	27130836	-	-	1.99316	1.87425	HOXA4	No	No
Peak_21271	chr7	27142392	27143640	-	-	1.6062	1.75869	HOXA5	Yes	No
Peak_2333	chr7	27147985	27153542	-1.10031	3.75656	-	-	HOXA-AS3	No	No
Peak_6498	chr7	27154111	27161532	-1.14896	4.64087	-	-	HOXA7	Yes	No
Peak_3937	chr7	27161729	27170031	-1.18162	6.01493	-1.12509	2.46764	HOXA10-AS	No	Yes
Peak_7660	chr7	27170085	27174938	-0.915552	2.17658	-	-	HOXA9	Yes	Yes
Peak_29644	chr7	28330199	28330404	-	-	-1.76535	1.52792	CREB5	No	NA
Peak_29066	chr7	28685219	28685595	-1.83766	1.91013	-2.13992	3.157	CREB5	No	NA
Peak_20135	chr7	28955545	28957366	-0.899307	1.95658	-	-	TRIL	No	NA
Peak_7246	chr7	29194309	29196948	-1.28181	2.2435	-	-	CHN2	No	Yes
Peak_39443	chr7	29337178	29337858	-1.11539	1.91867	-1.05623	2.13985	CHN2	No	Yes
Peak_5226	chr7	29562996	29566941	-0.740129	1.67189	-	-	PRR15-DT	No	NA
Peak_9743	chr7	29985502	29986113	0.97714	1.70115	-	-	FKBP14-AS1	No	NA
Peak_5762	chr7	29988325	29989811	-1.1164	1.74482	-	-	FKBP14-AS1	No	NA
Peak_19441	chr7	32762088	32763288	-1.03296	1.78203	-	-	DPY19L1P1	No	No
Peak_9177	chr7	32956896	32958200	-	-	0.79078	1.63443	FKBP9	No	Yes
Peak_31222	chr7	35692705	35693396	0.580955	1.83512	-	-	HERPUD2	No	Yes
Peak_6105	chr7	37340728	37343431	-0.994115	4.55586	-1.33477	7.66915	ELMO1	Yes	Yes
Peak_3973	chr7	37349716	37354243	-0.358117	1.6505	-	-	ELMO1	Yes	Yes
Peak_29398	chr7	37408521	37408778	-1.36719	1.38796	-1.51917	1.84792	ELMO1	Yes	Yes
Peak_31781	chr7	37421178	37421472	-	-	-1.53375	1.78435	ELMO1	Yes	Yes
Peak_11911	chr7	37683339	37685723	-1.13071	1.73572	-	-	GPR141	No	Yes
Peak_23262	chr7	38102685	38102995	-2.0095	1.38796	-	-	STARD3NL	No	No
Peak_11399	chr7	39130398	39131815	-1.31578	1.89563	-	-	POU6F2	No	Yes
Peak_491	chr7	39565514	39567115	-	-	-1.11451	1.35637	YAE1-DT	No	NA
Peak_20723	chr7	42227734	42228472	-2.35803	2.8808	-1.18461	1.39408	GLI3	Yes	No
Peak_19979	chr7	42238079	42238521	-2.25007	2.40923	-1.29863	1.51785	GLI3	Yes	No
Peak_25063	chr7	44039242	44039448	-	-	1.7341	1.56555	LINC00957	No	NA
Peak_16849	chr7	44104337	44104959	-1.24553	1.40883	-	-	AEBP1	No	Yes
Peak_6994	chr7	44489183	44491498	-	-	-0.691124	1.4232	NUDCD3	No	No
Peak_4924	chr7	44795847	44798312	-	-	-0.642139	1.3562	LOC105375260	No	NA
Peak_37849	chr7	44844984	44845209	-	-	-0.914294	1.37279	H2AZ2	No	NA
Peak_2672	chr7	44845300	44848205	-	-	-1.20717	4.35602	H2AZ2	No	NA
Peak_15935	chr7	44977598	44979062	-1.02535	2.69026	-1.1579	4.10498	MYO1G	Yes	Yes
Peak_10518	chr7	44985267	44987306	-1.05825	4.39219	-0.656889	1.96371	SNHG15	No	Yes
Peak_2813	chr7	45110645	45112558	-	-	-0.707727	1.87138	TBRG4	No	Yes
Peak_21472	chr7	47494286	47494741	-0.696117	1.34825	-	-	TNS3	No	Yes
Peak_5902	chr7	47580564	47582826	-0.711362	1.525	-0.679441	1.44823	TNS3	No	Yes
Peak_9992	chr7	47991648	47992435	-1.94753	3.40905	-1.53396	3.19537	SUN3	No	No
Peak_17599	chr7	48035461	48036380	-	-	1.19226	1.3636	C7orf57	No	Yes
Peak_15322	chr7	48088380	48089053	-	-	1.62577	2.10161	UPP1	No	No
Peak_1555	chr7	50303473	50309539	0.686463	3.15557	0.714124	3.16959	IKZF1	Yes	Yes
Peak_8131	chr7	50791407	50793462	-	-	0.796953	1.51065	GRB10	Yes	No
Peak_17631	chr7	51315472	51316809	-1.63479	1.31598	-	-	COBL	Yes	No
Peak_2544	chr7	54757848	54760085	0.595317	1.96879	-	-	SEC61G-DT	No	NA
Peak_12847	chr7	54773844	54774375	-	-	-1.72943	2.46764	SEC61G	No	Yes
Peak_4799	chr7	63899644	63901575	-1.04209	1.52335	-	-	LINC02848	No	NA
Peak_4200	chr7	63924853	63927255	-1.19848	2.17831	-0.901527	1.67504	LOC105375318	No	NA
Peak_9908	chr7	64306436	64308251	-0.809594	1.95658	-	-	ZNF736	No	No
Peak_1846	chr7	64902567	64904263	0.69504	1.45762	-	-	ZNF273	No	NA
Peak_2468	chr7	65005578	65007265	-	-	-0.929737	1.52092	ERV3-1-ZNF117	No	NA
Peak_12420	chr7	65251683	65252785	-1.09655	1.31076	-	-	LOC105375334	No	NA
Peak_7663	chr7	66075349	66076990	-	-	0.680543	1.30384	ASL	No	Yes
Peak_23226	chr7	66206717	66208095	-0.944517	2.71316	-1.00272	3.28767	TPST1	No	NA
Peak_24542	chr7	66281718	66282065	-1.12375	1.69639	-1.45029	2.57161	TPST1	No	NA
Peak_6946	chr7	66681220	66683160	0.888582	2.68631	0.649064	1.54735	RABGEF1	Yes	Yes
Peak_9355	chr7	69596904	69598040	-	-	-0.904887	1.42022	CT66	No	NA
Peak_3778	chr7	69598416	69601029	-1.35126	1.67189	-	-	AUTS2	Yes	Yes
Peak_11741	chr7	69824172	69825053	-	-	-1.04698	1.99403	AUTS2	Yes	Yes
Peak_30821	chr7	70006013	70006632	-1.28659	1.72657	-	-	AUTS2	Yes	Yes
Peak_6960	chr7	73577584	73579491	-	-	0.476406	1.51293	TBL2	No	Yes
Peak_8406	chr7	74209936	74211624	-0.780653	1.68	-0.789864	1.97944	LAT2	Yes	Yes
Peak_7365	chr7	74289467	74291213	-1.04251	3.22444	-0.841322	2.83421	CLIP2	No	Yes
Peak_16509	chr7	74480242	74481159	-	-	0.757213	1.57983	GTF2IRD1	Yes	Yes
Peak_10974	chr7	75639314	75640315	-1.04676	1.82459	-	-	HIP1	No	No
Peak_18433	chr7	76379645	76380647	-	-	0.878253	3.2456	SSC4D	No	Yes
Peak_6689	chr7	77198736	77200730	-	-	-0.894951	3.262	FGL2	No	Yes
Peak_4925	chr7	79451448	79455008	-	-	-0.950149	1.57895	MAGI2-AS3	No	No
Peak_1234	chr7	80134825	80137269	-1.1397	2.75261	-1.25666	3.5149	GNAI1	Yes	No
Peak_14871	chr7	80137333	80138197	-	-	-1.22526	4.74378	GNAI1	Yes	No
Peak_21555	chr7	87039157	87039748	-	-	-1.46509	1.42519	ELAPOR2	No	NA
Peak_781	chr7	87218377	87221096	-	-	-0.627063	1.32377	TMEM243	No	Yes
Peak_4529	chr7	87599317	87601449	-1.46697	2.18892	-1.54125	2.9693	ABCB1	Yes	No
Peak_35616	chr7	87873895	87874430	-	-	-1.02042	1.35748	DBF4	No	Yes
Peak_27140	chr7	88045485	88045864	1.0911	1.54218	-	-	ADAM22	Yes	Yes
Peak_3906	chr7	88218294	88221547	-	-	-0.698047	1.65697	SRI	No	Yes
Peak_18434	chr7	90210956	90212418	-1.45928	1.385	-	-	STEAP2-AS1	No	NA
Peak_25169	chr7	90700992	90701341	-	-	-1.54781	1.41491	CDK14	No	Yes
Peak_2734	chr7	92244548	92247820	-	-	-0.913307	1.67372	ANKIB1	Yes	NA
Peak_22235	chr7	92695473	92696282	1.13018	2.45751	1.36643	3.9444	CDK6	Yes	Yes
Peak_23047	chr7	92717858	92718918	0.655558	2.02499	1.33613	6.99769	CDK6	Yes	Yes
Peak_26727	chr7	92754811	92755161	-2.25647	3.66974	-1.55599	2.31311	CDK6	Yes	Yes
Peak_27360	chr7	92828220	92828564	-	-	-1.35697	1.47288	CDK6	Yes	Yes
Peak_1442	chr7	92829352	92836380	-0.86286	4.39219	-1.59761	16.9808	CDK6	Yes	Yes
Peak_23869	chr7	93043339	93043589	-1.789	1.45824	-	-	SAMD9	Yes	Yes
Peak_15907	chr7	93889869	93891119	-1.23914	1.33607	-	-	TFPI2-DT	No	NA
Peak_17309	chr7	94160942	94161418	-	-	-2.06684	1.80182	LOC107986820	No	NA
Peak_19445	chr7	94394631	94395276	-2.10344	2.21012	-1.49188	1.89493	COL1A2	Yes	No
Peak_35082	chr7	94395347	94395569	-	-	-1.83772	1.90258	COL1A2-AS1	No	NA
Peak_13402	chr7	98281762	98282964	1.09626	2.40923	0.968126	2.66179	BRI3	No	NA
Peak_28028	chr7	98283907	98284342	-	-	1.31822	5.01203	BRI3	No	NA
Peak_16654	chr7	99379213	99381518	-0.740094	2.10724	-0.683022	2.38671	ARPC1B	No	Yes
Peak_13607	chr7	99392643	99393615	0.550309	1.34795	1.10652	7.17103	ARPC1B	No	Yes
Peak_4211	chr7	99557543	99559938	-	-	-0.682419	2.77137	TMEM225B	No	NA
Peak_4107	chr7	99616219	99617926	0.834566	1.90394	0.735796	2.01317	ZSCAN25	No	NA
Peak_14413	chr7	99929079	99929746	-1.22889	1.66466	-	-	GJC3	No	Yes
Peak_35079	chr7	100041041	100041501	-2.02933	2.5234	-1.86519	3.0272	ZSCAN21	No	No
Peak_4316	chr7	100476286	100479864	-0.733279	2.63534	-0.692341	2.39116	TSC22D4	No	No
Peak_11388	chr7	100582472	100584391	-	-	-0.603601	1.35123	FBXO24	No	No
Peak_2374	chr7	100584487	100586248	-	-	-1.35552	1.84773	FBXO24	No	No
Peak_22917	chr7	100605224	100605905	-2.1321	2.69858	-1.18772	1.63453	PCOLCE	No	Yes
Peak_6942	chr7	100705366	100707038	-	-	1.14921	2.11071	POP7	No	Yes
Peak_14296	chr7	100852234	100853545	-1.16835	1.90726	-1.46726	3.35304	SLC12A9-AS1	No	NA
Peak_11328	chr7	101235657	101238571	-0.57925	1.66872	-	-	CLDN15	No	No
Peak_3324	chr7	101243804	101245493	-	-	0.822112	2.23853	FIS1	No	Yes
Peak_17779	chr7	101740880	101741533	-1.15765	2.40962	-1.08216	2.84728	CUX1	Yes	Yes
Peak_12065	chr7	101743184	101744307	-	-	0.657536	1.30823	CUX1	Yes	Yes
Peak_10638	chr7	101816575	101818544	-1.09373	2.56256	-1.47926	5.39391	CUX1	Yes	Yes
Peak_14128	chr7	101856090	101857101	-	-	-1.28157	2.66896	CUX1	Yes	Yes
Peak_26357	chr7	101913646	101914304	-1.10206	2.30797	-1.39506	2.70021	CUX1	Yes	Yes
Peak_21356	chr7	102140995	102141576	-1.41935	2.84117	-1.08567	1.72202	CUX1	Yes	Yes
Peak_16339	chr7	102284734	102285659	-1.35913	2.62159	-0.86312	1.38156	SH2B2	Yes	Yes
Peak_16503	chr7	102285759	102286726	-1.40289	1.63086	-	-	SH2B2	Yes	Yes
Peak_23100	chr7	104857617	104858057	-	-	-2.19565	1.70544	LHFPL3-AS1	No	NA
Peak_11258	chr7	105677575	105679711	-0.548182	1.38746	-	-	ATXN7L1	Yes	Yes
Peak_23052	chr7	106071100	106071915	-1.16069	1.52247	-	-	SYPL1	No	NA
Peak_23447	chr7	106108424	106109400	-0.640806	1.53827	-	-	SYPL1	No	NA
Peak_5672	chr7	106109537	106112348	-	-	-0.897069	3.35304	SYPL1	No	NA
Peak_35295	chr7	106731561	106731855	-	-	-2.25426	2.5514	CTB-30L5.1	No	Yes
Peak_1376	chr7	106864665	106867171	-1.21986	1.98788	-1.30518	2.87357	PIK3CG	Yes	No
Peak_15346	chr7	107660594	107662190	-1.10533	1.62368	-	-	SLC26A4-AS1	No	NA
Peak_2386	chr7	107742820	107745493	-	-	-0.630904	1.34934	CBLL1-AS1	No	NA
Peak_5429	chr7	107890409	107892555	-	-	-0.743143	2.16197	DLD	No	Yes
Peak_17216	chr7	108454657	108456526	-2.09258	1.94237	-	-	NRCAM	Yes	No
Peak_18110	chr7	111238570	111239332	-	-	-1.4316	2.77707	LRRN3	Yes	Yes
Peak_38017	chr7	111986728	111987080	-	-	-1.1616	1.50418	DOCK4	Yes	No
Peak_25507	chr7	111987368	111987723	-1.57863	1.4937	-2.014	2.25767	DOCK4	Yes	No
Peak_2622	chr7	112788815	112790968	-	-	-0.754237	1.50347	TMEM168	Yes	No
[truncated: 2,819 more rows]
