# Supplementary material for: Classification of Acute Myeloid Leukemia by Cell-Free DNA 5-Hydroxymethylcytosine
Source: Genes (Basel). 2023 May 28;14(6):1180. doi: 10.3390/genes14061180 (PMC10298116; doi:10.3390/genes14061180)
Supplement: Supplementary file 1 [file genes-14-01180-s001.zip › Table S5 Signaling pathways with differentially hydroxymethylated regions.xlsx]

## Sheet: Sheet1
Pathway ID	-Log10(FDR) C2 vs C1	Ratio C2 vs C1	-Log10(FDR) C3 vs C1	Ratio C3 vs C1
STAT3 Pathway	2.28	0.163	2.17	0.185
Cell Cycle Control of Chromosomal Replication	-	-	1.32	0.196
Relaxin Signaling	-	-	3.37	0.206
GP6 Signaling Pathway	1.97	0.157	3.09	0.213
CDX Gastrointestinal Cancer Signaling Pathway	2.88	0.158	1.57	0.153
G Beta Gamma Signaling	1.42	0.14	1.39	0.163
PAK Signaling	-	-	2.6	0.205
Chronic Myeloid Leukemia Signaling	7.15	0.194	7.51	0.227
Gα12/13 Signaling	-	-	2.82	0.203
Sumoylation Pathway	1.63	0.155	4.1	0.252
CLEAR Signaling Pathway	2.27	0.133	4.62	0.193
GPCR-Mediated Integration of Enteroendocrine Signaling Exemplified by an L Cell	1.37	0.16	-	-
Docosahexaenoic Acid (DHA) Signaling	-	-	1.54	0.237
Inhibition of Angiogenesis by TSP1	-	-	1.81	0.265
P2Y Purigenic Receptor Signaling Pathway	2.35	0.165	3.11	0.211
NAD Signaling Pathway	-	-	1.9	0.172
April Mediated Signaling	2.12	0.238	1.68	0.238
GM-CSF Signaling	-	-	2.27	0.229
Prostate Cancer Signaling	1.83	0.158	1.89	0.184
FLT3 Signaling in Hematopoietic Progenitor Cells	2.38	0.195	2.69	0.232
Role of Tissue Factor in Cancer	3.24	0.198	4.38	0.25
PTEN Signaling	2.34	0.159	5.74	0.252
NRF2-mediated Oxidative Stress Response	-	-	1.35	0.143
DNA Methylation and Transcriptional Repression Signaling	2.8	0.188	2.84	0.214
Role of Osteoblasts, Osteoclasts and Chondrocytes in Rheumatoid Arthritis	2.71	0.149	2.55	0.171
Type II Diabetes Mellitus Signaling	1.76	0.144	-	-
Ovarian Cancer Signaling	-	-	2.39	0.184
Regulation Of The Epithelial Mesenchymal Transition By Growth Factors Pathway	-	-	2.75	0.182
Mouse Embryonic Stem Cell Pluripotency	1.59	0.154	-	-
IL-6 Signaling	-	-	2.39	0.194
Thyroid Cancer Signaling	-	-	1.54	0.19
Apelin Endothelial Signaling Pathway	2.89	0.177	4.09	0.227
Cardiac β-adrenergic Signaling	-	-	1.33	0.15
Endocannabinoid Cancer Inhibition Pathway	3.86	0.197	6.78	0.272
Salvage Pathways of Pyrimidine Ribonucleotides	2.1	0.175	1.98	0.196
Role Of Osteoclasts In Rheumatoid Arthritis Signaling Pathway	1.64	0.12	3.34	0.172
Myelination Signaling Pathway	3.37	0.147	4.16	0.18
IL-17A Signaling in Fibroblasts	-	-	1.95	0.263
IL-9 Signaling	1.69	0.229	1.33	0.229
HGF Signaling	1.83	0.152	3.83	0.227
FAT10 Cancer Signaling Pathway	1.34	0.18	2.79	0.28
G-Protein Coupled Receptor Signaling	2.8	0.117	7.51	0.175
IL-3 Signaling	2.17	0.19	2.5	0.228
RANK Signaling in Osteoclasts	2.02	0.176	4.1	0.264
Sperm Motility	1.65	0.125	3.08	0.175
α-Adrenergic Signaling	1.71	0.156	3.01	0.22
Role of NFAT in Cardiac Hypertrophy	1.51	0.125	3.45	0.188
Coronavirus Pathogenesis Pathway	-	-	1.73	0.157
Multiple Sclerosis Signaling Pathway	1.36	0.122	3.53	0.189
Macrophage Alternative Activation Signaling Pathway	3.13	0.163	2.19	0.168
Leptin Signaling in Obesity	-	-	1.38	0.184
Tumor Microenvironment Pathway	-	-	1.76	0.162
HER-2 Signaling in Breast Cancer	2.92	0.154	2.35	0.167
Cholecystokinin/Gastrin-mediated Signaling	3.91	0.218	5.46	0.269
Autophagy	-	-	3.75	0.194
Ceramide Degradation	1.36	0.429	-	-
Role of OCT4 in Mammalian Embryonic Stem Cell Pluripotency	1.51	0.196	-	-
Coronavirus Replication Pathway	-	-	1.9	0.244
Hepatic Fibrosis Signaling Pathway	3.86	0.144	5.25	0.18
Cancer Drug Resistance By Drug Efflux	1.36	0.172	1.89	0.224
NF-κB Activation by Viruses	1.87	0.179	2.21	0.218
Virus Entry via Endocytic Pathways	-	-	1.99	0.186
Neurotrophin/TRK Signaling	-	-	1.9	0.205
WNT/Ca+ pathway	1.37	0.167	-	-
Role Of Chondrocytes In Rheumatoid Arthritis Signaling Pathway	-	-	3.08	0.206
Ephrin A Signaling	-	-	1.4	0.213
Fc Epsilon RI Signaling	-	-	2.88	0.212
Tight Junction Signaling	-	-	1.54	0.156
Role of Macrophages, Fibroblasts and Endothelial Cells in Rheumatoid Arthritis	3.08	0.142	3.11	0.166
Synaptogenesis Signaling Pathway	-	-	2.15	0.152
RHOA Signaling	1.55	0.145	2.04	0.185
Superpathway of Inositol Phosphate Compounds	1.33	0.12	1.41	0.145
Endocannabinoid Developing Neuron Pathway	-	-	4.12	0.236
Pyridoxal 5'-phosphate Salvage Pathway	2.09	0.2	-	-
VEGF Signaling	-	-	2.5	0.212
Thrombopoietin Signaling	1.83	0.19	2.31	0.238
S100 Family Signaling Pathway	1.93	0.106	-	-
Semaphorin Signaling in Neurons	1.58	0.18	5.29	0.344
Gαs Signaling	2.29	0.167	4.16	0.238
IL-15 Production	1.34	0.138	2.35	0.195
Basal Cell Carcinoma Signaling	2.12	0.194	-	-
GADD45 Signaling	1.95	0.2	5.39	0.35
Ephrin B Signaling	2.48	0.208	3.75	0.278
Huntington's Disease Signaling	1.73	0.124	2.53	0.163
Apelin Adipocyte Signaling Pathway	-	-	1.35	0.174
PI3K/AKT Signaling	2.73	0.155	3.54	0.195
IL-33 Signaling Pathway	1.46	0.129	1.57	0.156
Pulmonary Fibrosis Idiopathic Signaling Pathway	2.43	0.132	2.85	0.163
ILK Signaling	2.71	0.154	4.65	0.214
Molecular Mechanisms of Cancer	8.18	0.173	9.39	0.211
TWEAK Signaling	3.37	0.324	1.59	0.243
CD40 Signaling	3.08	0.239	2.09	0.224
Sonic Hedgehog Signaling	1.5	0.226	-	-
HOTAIR Regulatory Pathway	2.25	0.153	3.04	0.196
PEDF Signaling	1.37	0.155	2.57	0.226
Caveolar-mediated Endocytosis Signaling	-	-	1.72	0.2
Toll-like Receptor Signaling	1.58	0.167	1.31	0.179
Chemokine Signaling	-	-	1.47	0.185
Agrin Interactions at Neuromuscular Junction	-	-	2.33	0.232
MYC Mediated Apoptosis Signaling	1.34	0.18	2.35	0.26
ERB2-ERBB3 Signaling	-	-	1.54	0.2
Glioma Invasiveness Signaling	-	-	3.69	0.274
fMLP Signaling in Neutrophils	3.86	0.206	3.56	0.221
Aryl Hydrocarbon Receptor Signaling	2.88	0.17	2.11	0.176
Synaptic Long Term Potentiation	1.59	0.144	1.54	0.167
Regulation of Actin-based Motility by Rho	-	-	3.74	0.235
Polyamine Regulation in Colon Cancer	1.65	0.186	1.84	0.22
Hereditary Breast Cancer Signaling	-	-	1.71	0.169
Tumoricidal Function of Hepatic Natural Killer Cells	-	-	1.67	0.292
Axonal Guidance Signaling	2.1	0.116	4.4	0.165
Actin Nucleation by ARP-WASP Complex	1.37	0.151	4.31	0.269
GNRH Signaling	2.24	0.147	3.34	0.194
Opioid Signaling Pathway	2.59	0.139	4.54	0.193
IL-17A Signaling in Airway Cells	2	0.194	1.77	0.209
Apelin Muscle Signaling Pathway	-	-	1.35	0.208
Role of IL-17F in Allergic Inflammatory Airway Diseases	1.84	0.213	2.15	0.255
CXCR4 Signaling	3.37	0.179	5.8	0.244
ERK5 Signaling	-	-	1.76	0.203
cAMP-mediated signaling	-	-	3.79	0.191
4-1BB Signaling in T Lymphocytes	1.74	0.235	-	-
Angiopoietin Signaling	-	-	1.98	0.211
Cyclins and Cell Cycle Regulation	-	-	1.33	0.176
RAR Activation	3.31	0.166	2.32	0.171
Neuropathic Pain Signaling In Dorsal Horn Neurons	1.96	0.168	-	-
Lymphotoxin β Receptor Signaling	1.48	0.182	1.35	0.2
UVA-Induced MAPK Signaling	2.07	0.173	2.22	0.204
Erythropoietin Signaling Pathway	3.36	0.175	2.77	0.186
CCR3 Signaling in Eosinophils	2.88	0.179	2.21	0.187
Ephrin Receptor Signaling	2.7	0.153	5.71	0.228
Th1 and Th2 Activation Pathway	1.34	0.128	2.68	0.186
RAN Signaling	-	-	1.84	0.353
Renal Cell Carcinoma Signaling	-	-	2.16	0.215
Gap Junction Signaling	1.63	0.131	1.48	0.152
IL-7 Signaling Pathway	2.57	0.205	4.16	0.282
Glioblastoma Multiforme Signaling	3.31	0.175	2.46	0.181
HMGB1 Signaling	1.66	0.138	4.1	0.216
Wound Healing Signaling Pathway	1.37	0.119	-	-
RHOGDI Signaling	1.77	0.132	2.56	0.173
Role of MAPK Signaling in Inhibiting the Pathogenesis of Influenza	-	-	1.54	0.19
TGF-β Signaling	1.84	0.167	1.74	0.188
Role of NANOG in Mammalian Embryonic Stem Cell Pluripotency	1.31	0.137	-	-
Corticotropin Releasing Hormone Signaling	2.04	0.151	2.09	0.178
Ceramide Signaling	-	-	1.94	0.198
Aldosterone Signaling in Epithelial Cells	1.76	0.14	-	-
Hepatic Cholestasis	2.46	0.152	1.87	0.162
Cell Cycle: G1/S Checkpoint Regulation	-	-	1.72	0.206
VEGF Family Ligand-Receptor Interactions	-	-	1.94	0.202
Retinoic acid Mediated Apoptosis Signaling	1.61	0.183	2.5	0.25
Mechanisms of Viral Exit from Host Cells	-	-	1.36	0.22
mTOR Signaling	-	-	3.82	0.196
Th2 Pathway	1.7	0.146	1.87	0.175
TNFR1 Signaling	2.87	0.255	3.15	0.294
Signaling by Rho Family GTPases	2.44	0.139	4.78	0.199
Regulation of the Epithelial-Mesenchymal Transition Pathway	-	-	1.54	0.154
Role of JAK2 in Hormone-like Cytokine Signaling	1.87	0.194	1.36	0.194
Regulation of Cellular Mechanics by Calpain Protease	-	-	3.34	0.244
Sphingosine-1-phosphate Signaling	3.69	0.208	5.8	0.275
IL-8 Signaling	3.14	0.162	4.55	0.21
UVC-Induced MAPK Signaling	-	-	1.54	0.216
MIF-mediated Glucocorticoid Regulation	-	-	1.67	0.25
Glycogen Biosynthesis II (from UDP-D-Glucose)	1.36	0.429	-	-
iNOS Signaling	1.47	0.191	-	-
ERK/MAPK Signaling	-	-	3.79	0.195
ID1 Signaling Pathway	2.22	0.144	5.74	0.229
IGF-1 Signaling	-	-	2.53	0.21
Granzyme B Signaling	-	-	1.95	0.375
Regulation Of The Epithelial Mesenchymal Transition In Development Pathway	2.87	0.207	-	-
AMPK Signaling	3.86	0.169	4.12	0.194
Thrombin Signaling	3.69	0.169	4.5	0.204
PDGF Signaling	-	-	1.52	0.184
Protein Kinase A Signaling	3.57	0.141	7.51	0.202
IL-1 Signaling	2.46	0.188	3.01	0.229
Ribonucleotide Reductase Signaling Pathway	3.06	0.171	6.02	0.247
Cardiac Hypertrophy Signaling	1.58	0.123	6.25	0.218
Pyroptosis Signaling Pathway	-	-	1.32	0.172
3-phosphoinositide Biosynthesis	-	-	1.33	0.146
Small Cell Lung Cancer Signaling	3.37	0.219	2.64	0.219
CREB Signaling in Neurons	1.93	0.11	1.8	0.132
IL-17 Signaling	-	-	1.97	0.166
LPS-stimulated MAPK Signaling	1.93	0.176	1.9	0.2
Fcγ Receptor-mediated Phagocytosis in Macrophages and Monocytes	1.91	0.17	4.25	0.266
HIF1α Signaling	-	-	2.47	0.173
Human Embryonic Stem Cell Pluripotency	1.57	0.129	1.41	0.149
Ferroptosis Signaling Pathway	-	-	1.32	0.159
Growth Hormone Signaling	2.88	0.225	1.9	0.211
Sirtuin Signaling Pathway	-	-	2.48	0.16
Oxytocin In Brain Signaling Pathway	-	-	1.45	0.151
Insulin Secretion Signaling Pathway	2.78	0.143	3.08	0.173
EGF Signaling	1.44	0.179	1.98	0.232
Endothelin-1 Signaling	1.71	0.134	1.98	0.165
Role Of Osteoblasts In Rheumatoid Arthritis Signaling Pathway	2.54	0.143	2.53	0.168
Pancreatic Adenocarcinoma Signaling	2.88	0.183	2.23	0.19
TREM1 Signaling	-	-	1.94	0.208
B Cell Activating Factor Signaling	2.07	0.233	2	0.256
Acute Myeloid Leukemia Signaling	2.7	0.198	2.91	0.231
Role of RIG1-like Receptors in Antiviral Innate Immunity	1.51	0.196	-	-
ERBB Signaling	-	-	2.8	0.226
Adrenomedullin signaling pathway	2.03	0.141	3.31	0.191
Acute Phase Response Signaling	-	-	1.4	0.151
Colorectal Cancer Metastasis Signaling	2.8	0.144	7.19	0.225
Circadian Rhythm Signaling	2.42	0.138	1.57	0.146
VDR/RXR Activation	4.37	0.269	2.21	0.218
Reelin Signaling in Neurons	-	-	2.07	0.181
Oxytocin Signaling Pathway	2.34	0.135	3.01	0.17
Osteoarthritis Pathway	3.86	0.169	3.54	0.186
Non-Small Cell Lung Cancer Signaling	2.23	0.181	3.1	0.234
Estrogen Receptor Signaling	2.38	0.125	2.08	0.144
Insulin Receptor Signaling	-	-	3.11	0.207
RAC Signaling	1.7	0.146	4.25	0.234
Melanocyte Development and Pigmentation Signaling	-	-	2.53	0.214
BER (Base Excision Repair) Pathway	-	-	1.95	0.25
Leukocyte Extravasation Signaling	2.42	0.15	4.12	0.207
Melanoma Signaling	-	-	1.97	0.24
Protein Ubiquitination Pathway	-	-	1.47	0.143
Iron homeostasis signaling pathway	1.67	0.145	2.07	0.181
PPAR Signaling	2.36	0.178	-	-
IL-23 Signaling Pathway	-	-	1.45	0.217
eNOS Signaling	-	-	1.75	0.167
Neurovascular Coupling Signaling Pathway	1.74	0.129	-	-
TNFR2 Signaling	1.44	0.219	-	-
Role of IL-17A in Arthritis	1.74	0.193	2.7	0.263
p38 MAPK Signaling	1.66	0.15	1.43	0.167
Breast Cancer Regulation by Stathmin1	1.83	0.109	1.98	0.135
Glioma Signaling	1.52	0.144	2.27	0.192
Cardiac Hypertrophy Signaling (Enhanced)	3.46	0.131	5.94	0.175
Pulmonary Healing Signaling Pathway	2.03	0.141	2.51	0.176
Gαi Signaling	-	-	1.99	0.179
Semaphorin Neuronal Repulsive Signaling Pathway	-	-	3.61	0.213
JAK/STAT Signaling	1.73	0.171	2.69	0.232
Th1 Pathway	-	-	1.87	0.18
Paxillin Signaling	-	-	3.82	0.243
Phagosome Formation	-	-	1.92	0.131
PFKFB4 Signaling Pathway	-	-	2.08	0.25
Natural Killer Cell Signaling	-	-	3.34	0.192
IL-2 Signaling	-	-	2	0.226
Role of JAK1 and JAK3 in γc Cytokine Signaling	-	-	1.37	0.188
Unfolded protein response	-	-	1.41	0.178
Germ Cell-Sertoli Cell Junction Signaling	-	-	5.33	0.235
Actin Cytoskeleton Signaling	2.1	0.135	3.52	0.184
Melatonin Signaling	1.48	0.167	2.17	0.222
NGF Signaling	1.4	0.142	2.79	0.208
MSP-RON Signaling In Cancer Cells Pathway	3.24	0.186	3.11	0.207
TR/RXR Activation	2.95	0.214	1.64	0.19
Clathrin-mediated Endocytosis Signaling	-	-	2.23	0.168
Gαq Signaling	4.37	0.2	6.02	0.247
Death Receptor Signaling	2.8	0.198	3.75	0.25
ERBB4 Signaling	-	-	1.72	0.206
Neuregulin Signaling	-	-	1.78	0.179
Apoptosis Signaling	1.87	0.163	2.26	0.202
14-3-3-mediated Signaling	1.47	0.142	1.95	0.181
Oncostatin M Signaling	2.07	0.233	1.62	0.233
UVB-Induced MAPK Signaling	1.61	0.192	1.49	0.212
Macrophage Classical Activation Signaling Pathway	-	-	1.5	0.153
p53 Signaling	3.01	0.204	3.62	0.245
Hypoxia Signaling in the Cardiovascular System	2.99	0.224	1.98	0.211
Renin-Angiotensin Signaling	1.88	0.157	3.07	0.215
Apelin Cardiomyocyte Signaling Pathway	2.7	0.192	2.18	0.202
IL-10 Signaling	2.25	0.156	-	-
Integrin Signaling	2.88	0.156	8.35	0.259
Production of Nitric Oxide and Reactive Oxygen Species in Macrophages	1.36	0.126	2.29	0.173
Role of MAPK Signaling in Promoting the Pathogenesis of Influenza	-	-	2.15	0.193
Xenobiotic Metabolism General Signaling Pathway	-	-	1.67	0.168
Factors Promoting Cardiogenesis in Vertebrates	3.34	0.183	1.39	0.157
Senescence Pathway	2.59	0.137	6.04	0.207
PPARα/RXRα Activation	2.37	0.149	3.46	0.195
Epithelial Adherens Junction Signaling	2.7	0.166	4.22	0.223
WNT/β-catenin Signaling	1.51	0.132	-	-
Prolactin Signaling	1.87	0.168	3.06	0.232
Sertoli Cell-Sertoli Cell Junction Signaling	-	-	2.29	0.17
Induction of Apoptosis by HIV1	1.74	0.185	1.54	0.2
D-myo-inositol (1,4,5)-trisphosphate Degradation	-	-	1.38	0.312
